# Supplementary material for: Development of mammalian cell logic gates controlled by unnatural amino acids
Source: PubMed Central journal article supplement (PMC9017196; doi:10.1016/j.crmeth.2021.100073), 2021-09-16
Supplement: mmc1.pdf [file mmc1.pdf]

**Cell Reports Methods, Volume 1**

**Supplemental information**

**Development of mammalian cell logic gates  
controlled by unnatural amino acids**

**Emily M. Mills, Victoria L. Barlow, Arwyn T. Jones, and Yu-Hsuan Tsai**

## Table of Contents

|                                                                                                                                                             |    |
|-------------------------------------------------------------------------------------------------------------------------------------------------------------|----|
| 1. Supplementary Figures .....                                                                                                                              | 2  |
| Figure S1. Production of eGFP(150XXXX) using different Pyl tRNA variants. Related to Figure 2. ....                                                         | 2  |
| Figure S2. Utilisation of TyrRS*/tRNA <sub>CUA</sub> as the second orthogonal pair. Related to Figure 3. ....                                               | 3  |
| Figure S3. Incorporation of AzF and BockK into a single eGFP using Tyr tRNA <sub>CUA</sub> and Pyl tRNA <sub>UCCU(EV2)</sub> . Related to STAR Methods..... | 4  |
| Figure S4. Logic gate vector specificity test. Related to Figure 4.....                                                                                     | 5  |
| 2. Methods S1 .....                                                                                                                                         | 6  |
| 2.1 Table S1. Primers used in this study. Related to STAR methods. ....                                                                                     | 6  |
| 2.2 Working vector sequences. Related to STAR methods. ....                                                                                                 | 7  |
| 2.2.1 Vector 1: Pyl tRNA <sub>CUA</sub> (U25C).....                                                                                                         | 7  |
| 2.2.2 Vector 55: 4x(Tyr tRNA <sub>CUA</sub> ) TyrRS* mCherry-P2A-TAG-sGFP(1-10).....                                                                        | 8  |
| 2.2.3 Vector 56: 4x(Pyl tRNA <sub>UCCU(EV2)</sub> ) PylIRS mCherry-P2A-AGGA-sGFP(11) .....                                                                  | 11 |
| 2.2.4 Vector 57: 4x(Tyr tRNA <sub>CUA</sub> ) TyrRS* sGFP(1-10)-TAG-sGFP(11).....                                                                           | 13 |
| 2.2.5 Vector 58: Pyl tRNA <sub>CUA</sub> (U25C) PylIRS mCherry-P2A-eGFP(150TAG) .....                                                                       | 15 |
| 2.2.6 Vector 59: Pyl tRNA <sub>UCUA</sub> PylIRS mCherry-P2A-eGFP(150TAGA) .....                                                                            | 17 |
| 2.2.7 Vector 60: Pyl tRNA <sub>UCUA(EV1)</sub> PylIRS mCherry-P2A-eGFP(150TAGA) .....                                                                       | 19 |
| 2.2.8 Vector 61: Pyl tRNA <sub>UCUA(EV2)</sub> PylIRS mCherry-P2A-eGFP(150TAGA) .....                                                                       | 21 |
| 2.2.9 Vector 62: Pyl tRNA <sub>CUAG</sub> PylIRS mCherry-P2A-eGFP(150CTAG) .....                                                                            | 23 |
| 2.2.10 Vector 63: Pyl tRNA <sub>CUAG(EV1)</sub> PylIRS mCherry-P2A-eGFP(150CTAG).....                                                                       | 25 |
| 2.2.11 Vector 64: Pyl tRNA <sub>UCCU</sub> PylIRS mCherry-P2A-eGFP(150AGGA) .....                                                                           | 27 |
| 2.2.12 Vector 65: Pyl tRNA <sub>UCCU(EV1)</sub> PylIRS mCherry-P2A-eGFP(150AGGA) .....                                                                      | 29 |
| 2.2.13 Vector 66: Pyl tRNA <sub>UCCU(EV2)</sub> PylIRS mCherry-P2A-eGFP(150AGGA) .....                                                                      | 31 |
| 2.2.14 Vector 67: Pyl tRNA <sub>ACUA</sub> PylIRS mCherry-P2A-eGFP(150TAGT) .....                                                                           | 33 |
| 2.2.15 Vector 68: Pyl tRNA <sub>CCUA</sub> PylIRS mCherry-P2A-eGFP(150TAGG) .....                                                                           | 35 |
| 2.2.16 Vector 69: Pyl tRNA <sub>GCUA</sub> PylIRS mCherry-P2A-eGFP(150TAGC) .....                                                                           | 37 |
| 2.2.17 Vector 71: Tyr tRNA <sub>CUA</sub> TyrRS* mCherry-P2A-eGFP(150TAG).....                                                                              | 39 |
| 2.2.18 Vector 73: 4x(Pyl tRNA <sub>UCCU(EV2)</sub> ) PylIRS mCherry-P2A-eGFP(150AGGA) .....                                                                 | 41 |
| 2.2.19 Vector 74: 4x(Tyr tRNA <sub>CUA</sub> ) TyrRS* mCherry-P2A-eGFP(150TAG).....                                                                         | 43 |

# 1. Supplementary Figures

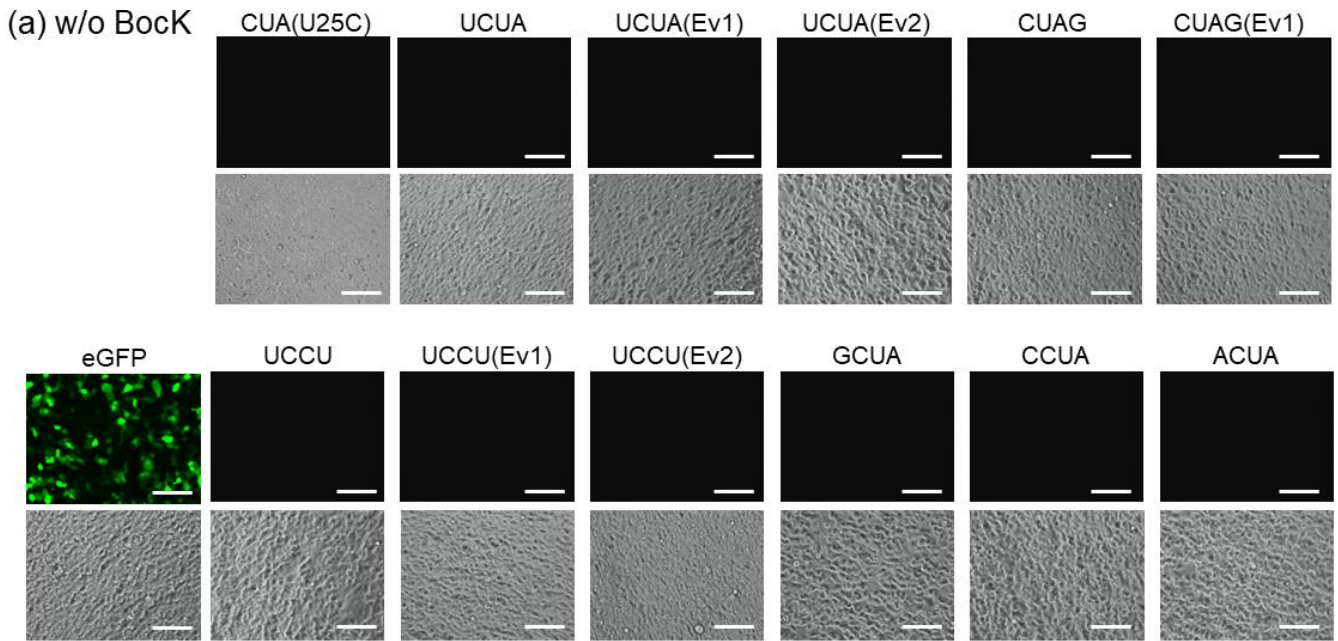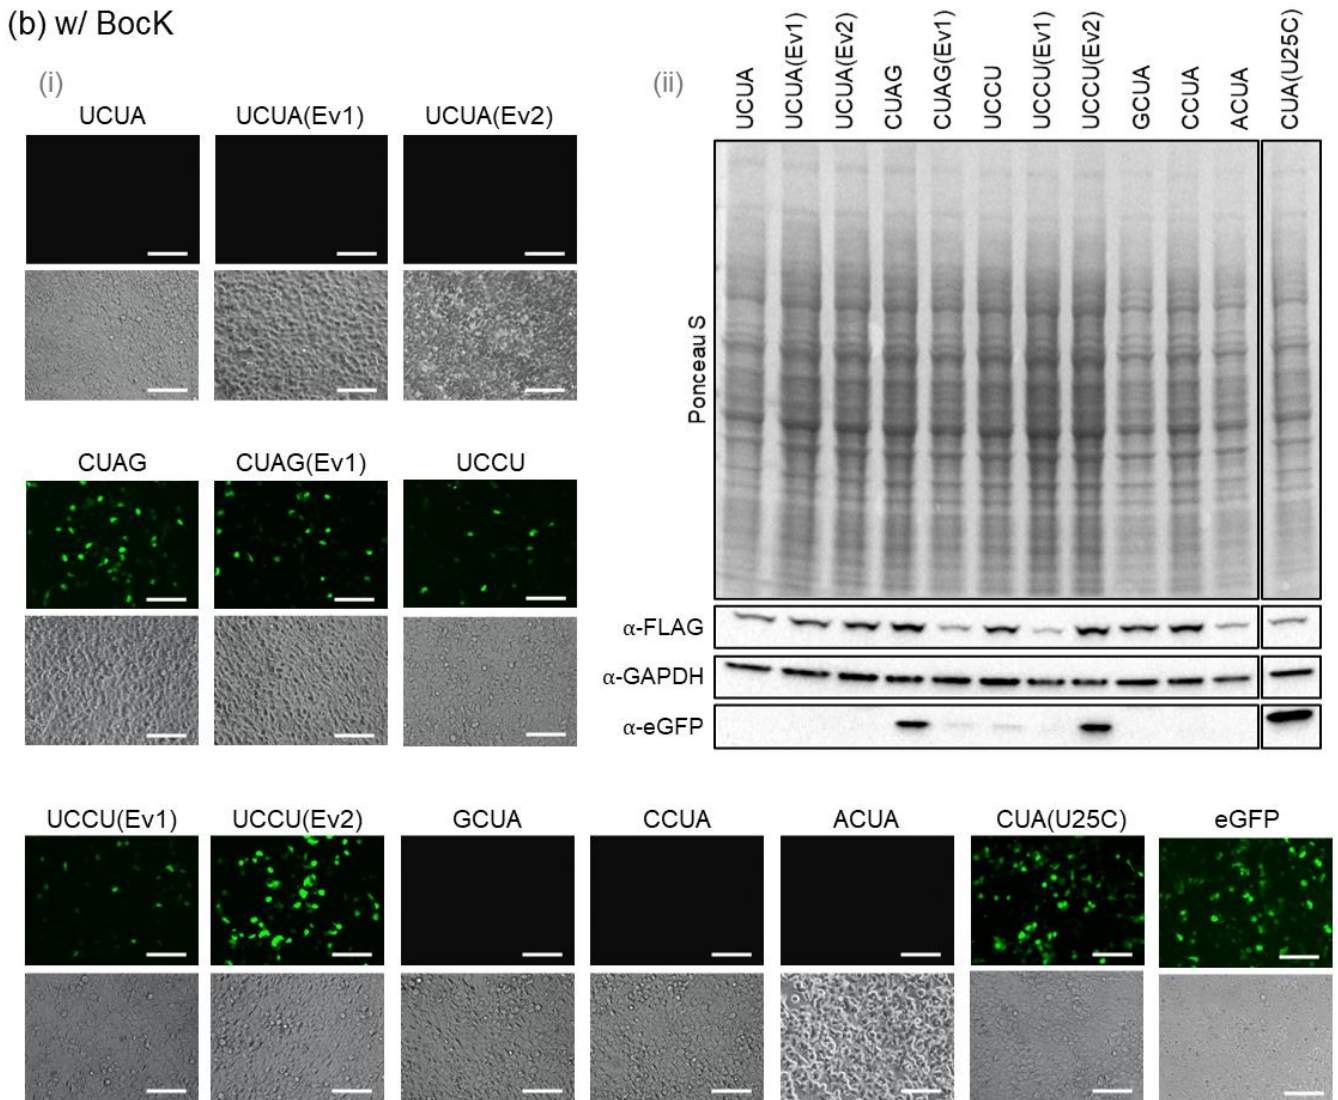

**Figure S1. Production of eGFP(150XXXX) using different Pyl tRNA variants.** Related to Figure 2. HEK293 cells were transiently transfected with the designated evaluation vector encoding the wild-type *M. mazei* PylRS, a Pyl tRNA variant and an eGFP reporter with the appropriate quadruplet codon at the position for the 150<sup>th</sup> amino acid residue in the absence (a) or presence (b) of 1 mM BocK for 24 h. No GFP fluorescence was detected for any of the variants when BocK was not supplemented. Transfection with a vector carrying the wild-type eGFP was used as the positive control. Bright field images show cell confluency in each condition. All images are 223  $\mu\text{m}$   $\times$  167  $\mu\text{m}$ , scale bars denote 50  $\mu\text{m}$ . Immunoblotting with  $\alpha$ -FLAG and  $\alpha$ -GFP antibodies were used to detect PylRS and full-length eGFP, respectively. An irrelevant lane was digitally deleted from the blot and is indicated by the gap between ACUA and CUA(U25C).

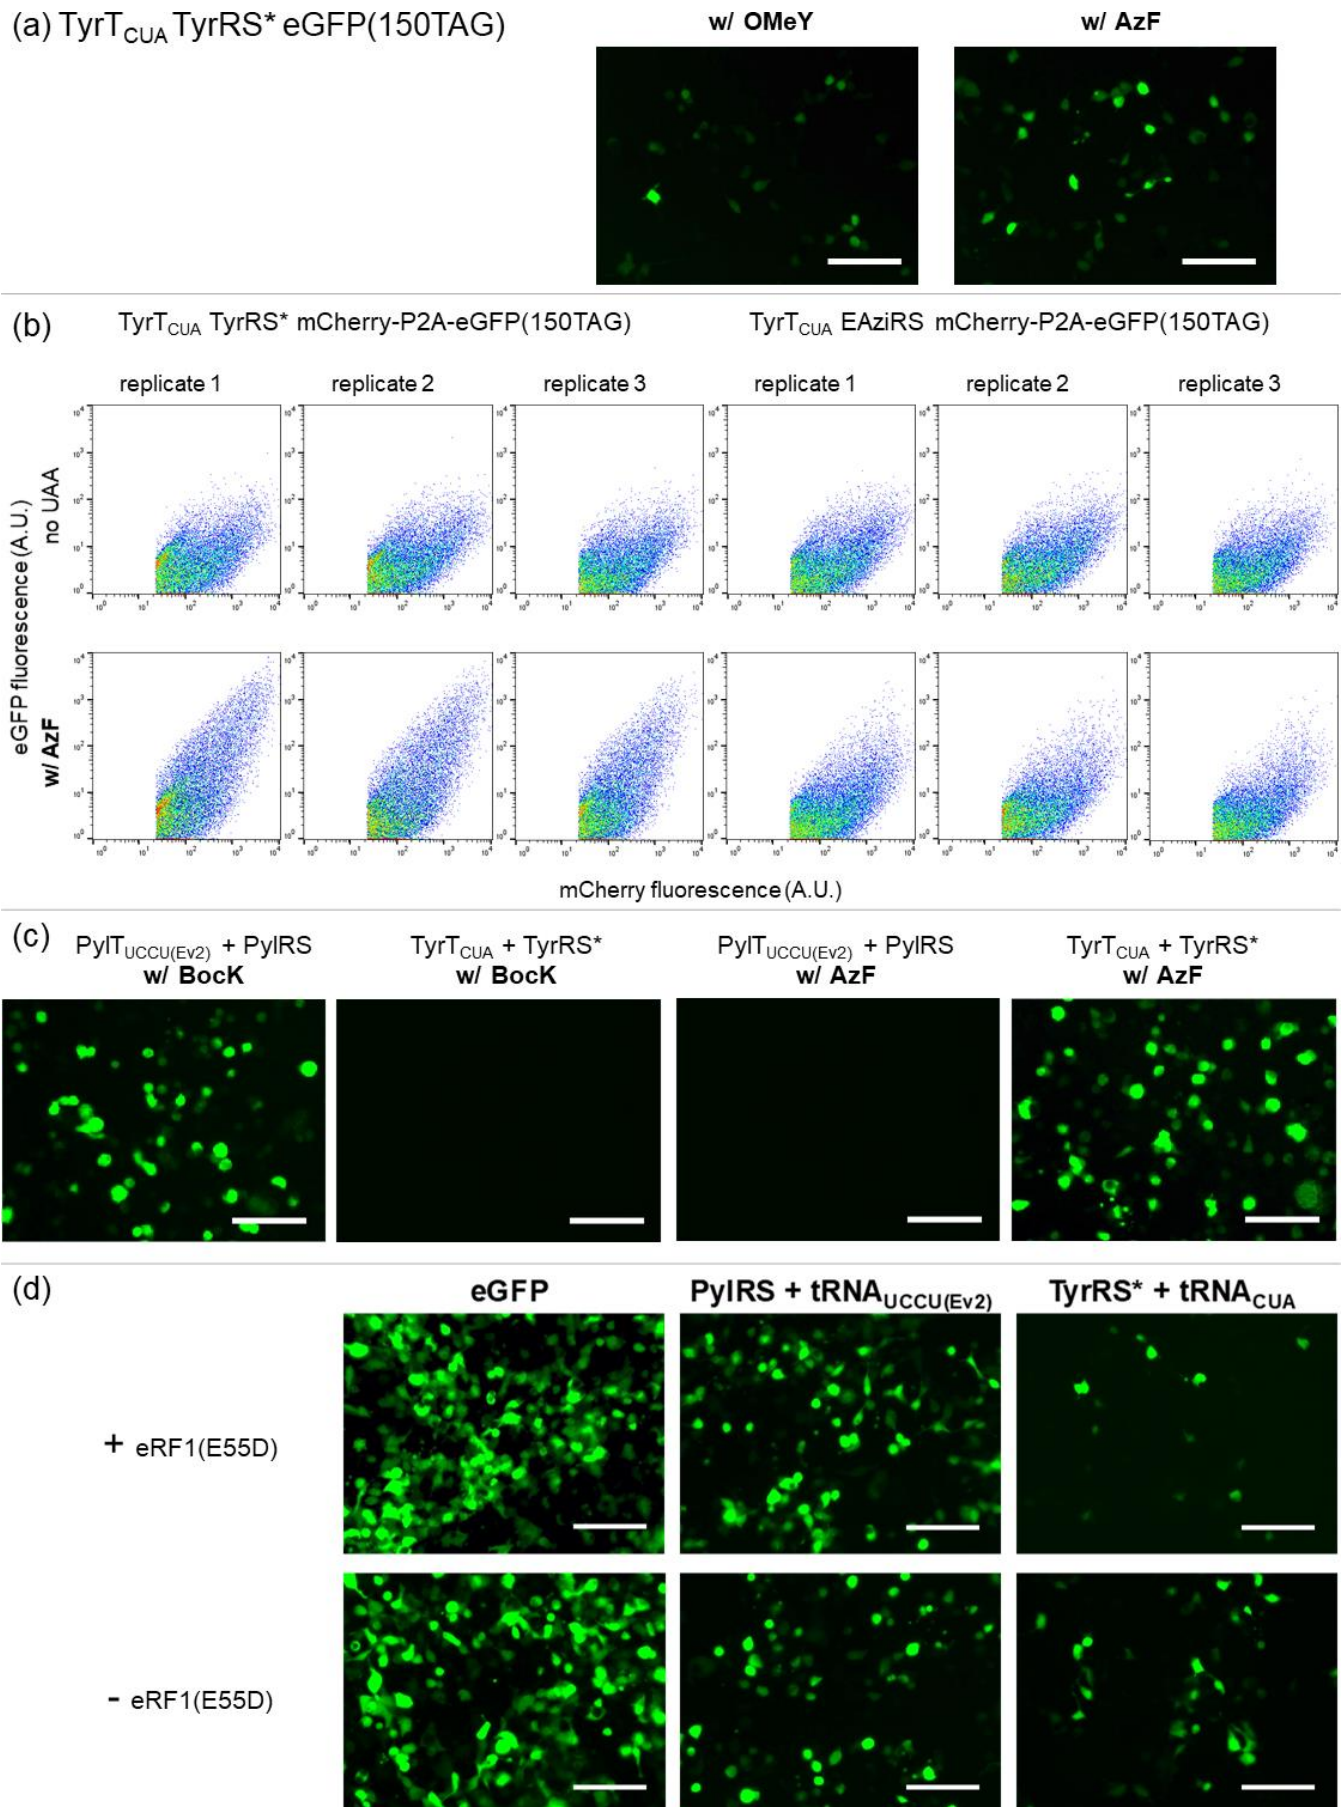

**Figure S2. Utilisation of TyrRS\*/tRNA<sub>CUA</sub> as the second orthogonal pair. Related to Figure 3.** (a) Incorporation of OMeY and AzF into eGFP(150TAG) with TyrRS\*. Fluorescence microscopy images of OMeY and AzF incorporation into the 150<sup>th</sup> amino acid position of eGFP demonstrate higher levels of eGFP fluorescence when AzF is incorporated. (b) Flow cytometry analysis of incorporation of AzF into eGFP(150TAG) by TyrRS\* or EAziRS. HEK293 cells transfected with TyrT<sub>CUA</sub> TyrRS\* mCherry-P2A-eGFP(150TAG) or TyrT<sub>CUA</sub> EAziRS mCherry-P2A-eGFP(150TAG) were incubated in the absence or presence of AzF for 48 hours before flow cytometry analysis. Events were gated for HEK293 cells and to exclude doublets. Cells were then gated to include only transfected (i.e. mCherry positive) cells. Fluorescence intensities are given in arbitrary units (A.U.). Three biological replicates for each condition are shown. The mean fluorescence intensities were used to calculate the incorporation efficiency as per the equation in Figure 2. The incorporation efficiency is 8% ± 2% for TyrT<sub>CUA</sub> TyrRS\* mCherry-P2A-eGFP(150TAG), and 0.6% ± 0.3% for TyrT<sub>CUA</sub> EAziRS mCherry-P2A-eGFP(150TAG). (c) Orthogonality of tRNA/aaRA pairs. HEK293 cells transfected with PyIRS/tRNA<sub>UCCU(EV2)</sub> or TyrRS\*/tRNA<sub>CUA</sub> reporter vector and incubated for 24 hours in the presence of AzF or BockK, respectively. Fluorescent eGFP was only

detected when the aaRS/tRNA pairs were in the presence of their cognate unnatural amino acid depicting mutual orthogonality of the pairs. (d) Impact of eRF1(E55D) on incorporation efficiency of TyrRS\*/tRNA<sub>CUA</sub> or PylRS/tRNA<sub>UCCU(EV2)</sub>. No substantial increase in eGFP fluorescence was observed. eRF1(E55D) was also expressed alongside wildtype eGFP as a control. All fluorescent images are 223 μm × 167 μm, scale bars denote 50 μm.

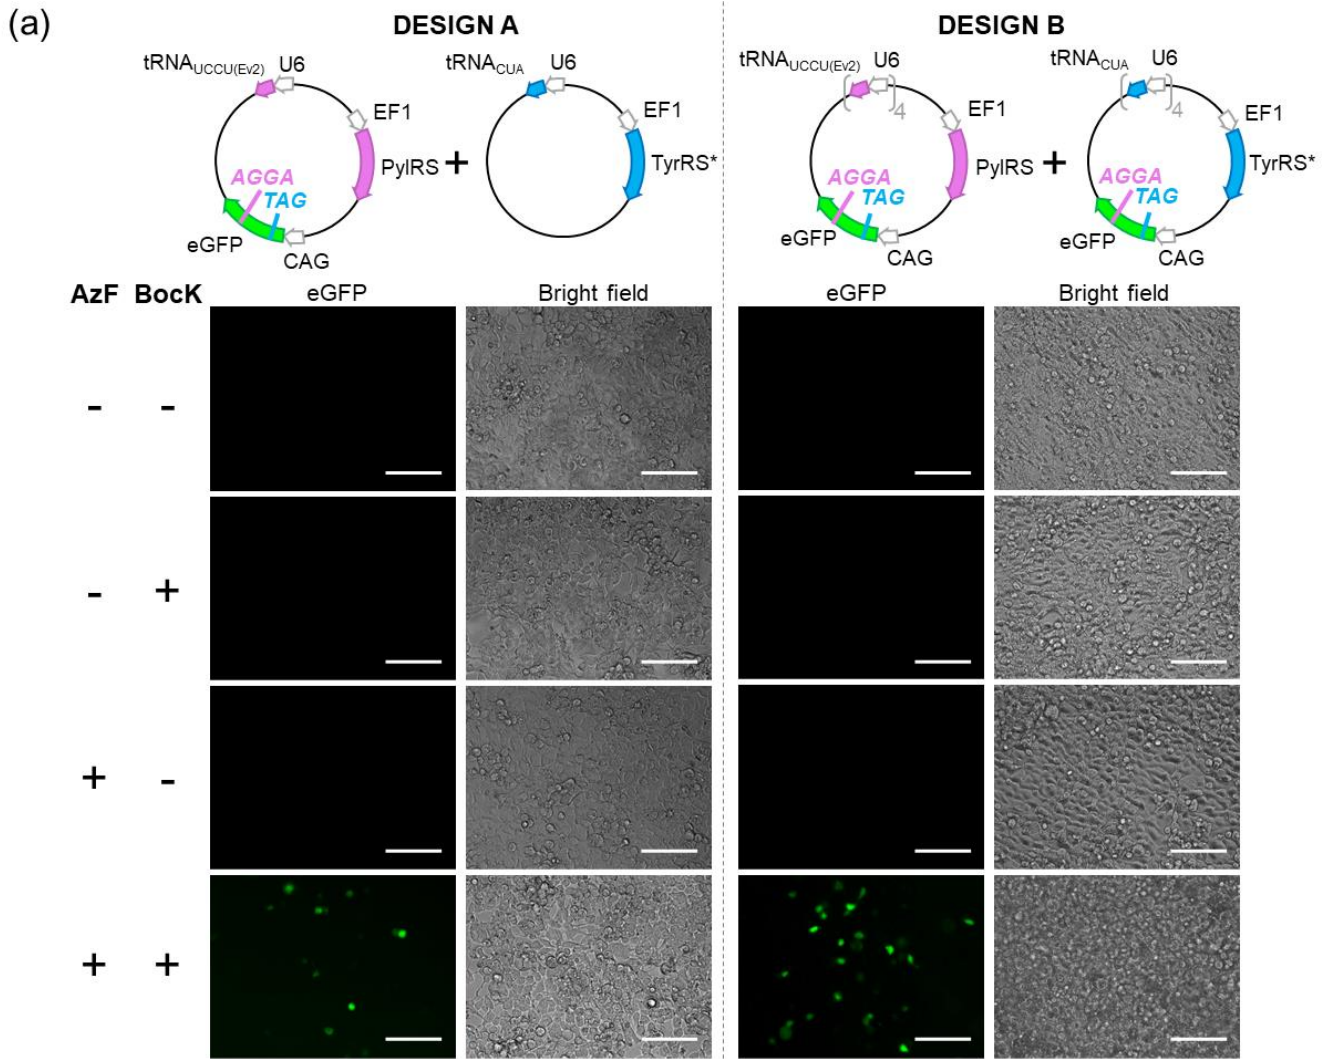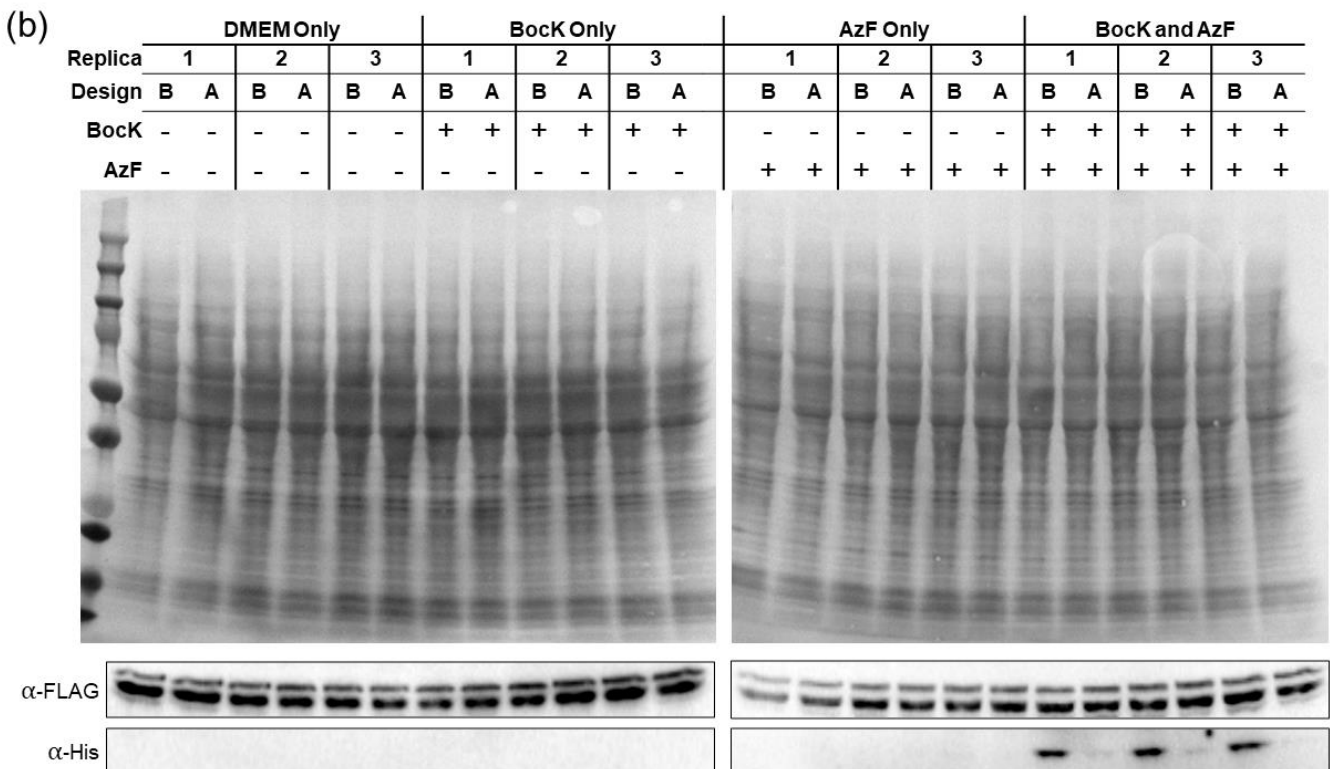

**Figure S3. Incorporation of AzF and BocK into a single eGFP using Tyr tRNA<sub>CUA</sub> and Pyl tRNA<sub>UCCU(EV2)</sub>. Related to STAR Methods.** (a) AzF was incorporated at the 40<sup>th</sup> residue of the mutant eGFP using amber suppression and BocK was incorporated into the 150<sup>th</sup> residue of the eGFP mutant using AGGA suppression. Double incorporation was investigated with two experimental designs: Design A comprised of a single reporter gene and tRNA for respective pairs, Design B an attempt at optimisation with increased tRNA and reporter copy number. eGFP fluorescence was only detected when cells were supplemented with both AzF and

BocK, Design B demonstrated higher levels of eGFP fluorescence. (b) Western blot of Design A vs Design B with three biological replicates of 4 conditions: (1) no unnatural amino acid, (2) BocK only, (3) AzF only and (4) BocK and AzF. Full length eGFP was only detected when both unnatural amino acids are supplemented, with Design B yielding substantially higher eGFP band intensity. All fluorescent images are 223  $\mu\text{m} \times 167 \mu\text{m}$ , scale bars denote 50  $\mu\text{m}$ .

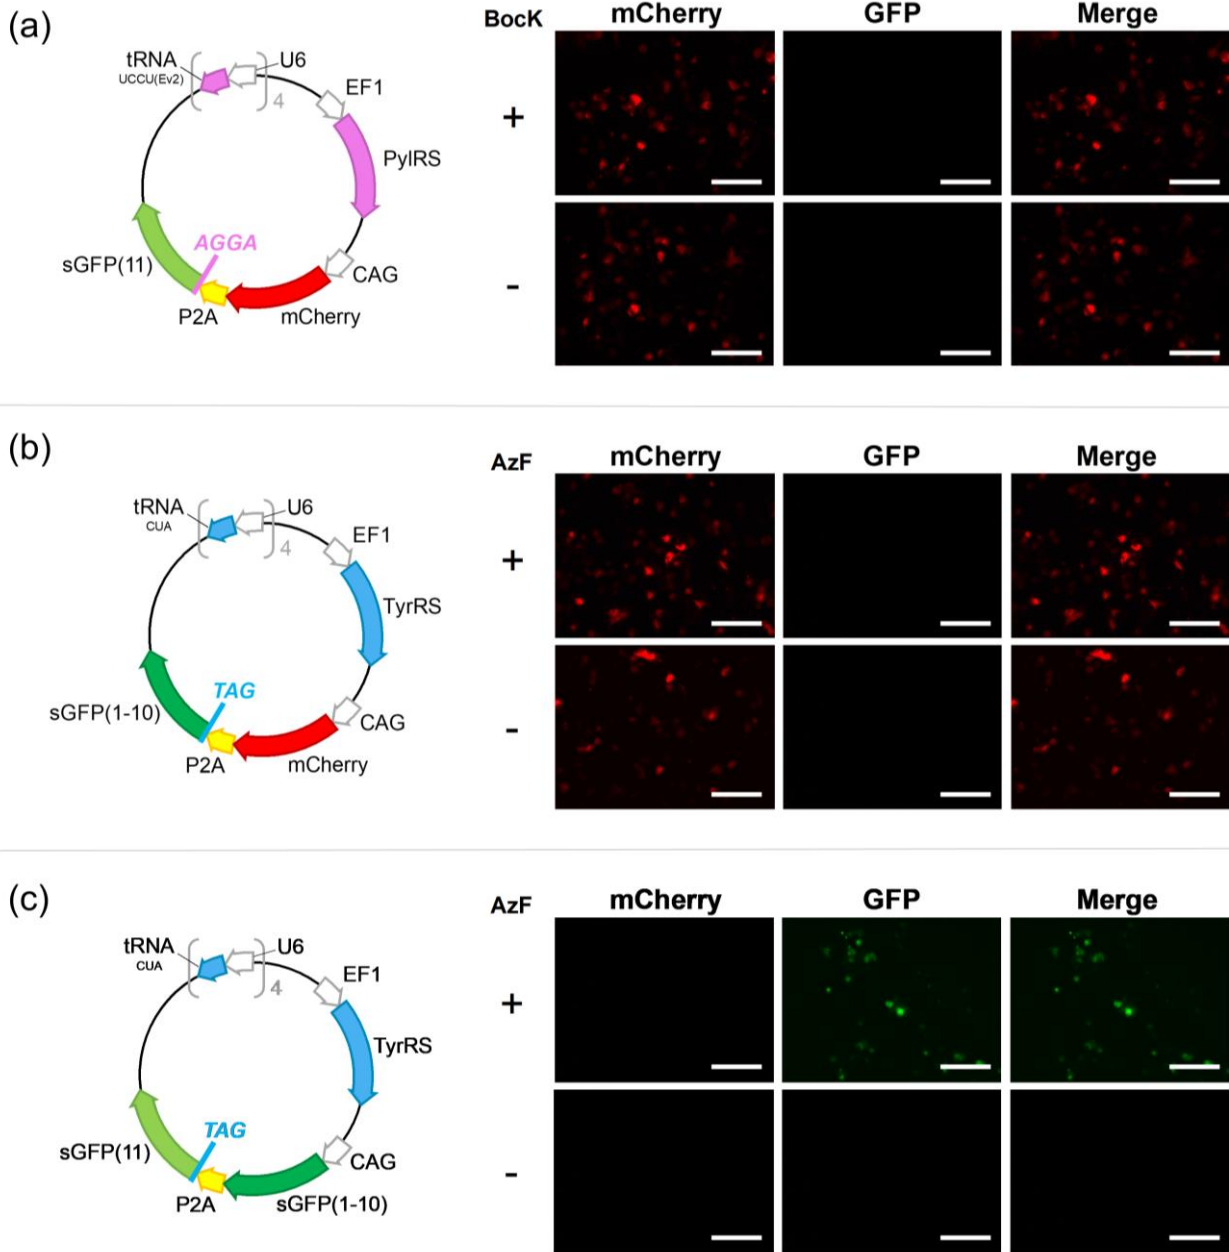

**Figure S4. Logic gate vector specificity test. Related to Figure 4.** (a-c) Individual transfection of logic gate vectors in the presence (+) or absence (-) of their respective unnatural amino acid (BocK or AzF) at 1 mM. All images depicted are 223  $\mu\text{m} \times 167 \mu\text{m}$ , scale bars denote 50  $\mu\text{m}$ .

## 2. Methods S1

**2.1 Table S1. Primers used in this study. Related to STAR methods.**

| Primer ID | Primer sequence (5'-3')                                                           |
|-----------|-----------------------------------------------------------------------------------|
| Primer 1  | GGGGGATACGGGGAAAAGGCCTAAAAACCGCACTTGTCCGAAAC                                      |
| Primer 2  | GGTCAGGGCTGGGGCAGAGGCTTGCACAGGGGCAGACATG                                          |
| Primer 3  | ATCATGGCTGATAAGCAGAAGAAC                                                          |
| Primer 4  | CGTTCTTCTGCTTATCAGCCATGATATAGACTCTAGTGGCTGTTGTAGTTGACTCCAGCTTG                    |
| Primer 5  | CGTTCTTCTGCTTATCAGCCATGATATAGACTCTAGTGGCTGTTGTAGTTGACTCCAGCTTG                    |
| Primer 6  | CGTTCTTCTGCTTATCAGCCATGATATAGACTCTGTGGCTGTTGTAGTTGACTCCAGCTTG                     |
| Primer 7  | CGTTCTTCTGCTTATCAGCCATGATATAGACTCTAGTGGCTGTTGTAGTTGACTCCAGCTTG                    |
| Primer 8  | CGTTCTTCTGCTTATCAGCCATGATATAGACTCTAGTGGCTGTTGTAGTTGACTCCAGCTTG                    |
| Primer 9  | CGTTCTTCTGCTTATCAGCCATGATATAGACTCTAGTGGCTGTTGTAGTTGACTCCAGCTTG                    |
| Primer 10 | TTCGATCTACATGATCAGGTTTCCGGTG                                                      |
| Primer 11 | ACCTGATCATGTAGATCGAATGGACTTCTAAATCCGTTCCAGCCGGGTTAGATTCC                          |
| Primer 12 | ACCTGATCATGTAGATCGAATGGGCTTCTAATCTCGTTCCAGCCGGGTTAGATTCC                          |
| Primer 13 | ACCTGATCATGTAGATCGAATGGGCTTCTAATCCGTTCCAGCCGGGTTAGATTCC                           |
| Primer 14 | ACCTGATCATGTAGATCGAATGGACTCTAGAATCCGTTCCAGCCGGGTTAGATTCC                          |
| Primer 15 | ACCTGATCATGTAGATCGAATGGCCTCTAGAATCCGTTCCAGCCGGGTTAGATTCC                          |
| Primer 16 | ACCTGATCATGTAGATCGAATGGACTTCTAATCCGTTCCAGCCGGGTTAGATTCC                           |
| Primer 17 | ACCTGATCATGTAGATCGAATCCTCTTCTAATAGTTCCAGCCGGGTTAGATTCC                            |
| Primer 18 | ACCTGATCATGTAGATCGAAGGGGCTTCTATCCGTTCCAGCCGGGTTAGATTCC                            |
| Primer 19 | ACCTGATCATGTAGATCGAATGGACTACTAAATCCGTTCCAGCCGGGTTAGATTCC                          |
| Primer 20 | ACCTGATCATGTAGATCGAATGGACTGCTAAATCCGTTCCAGCCGGGTTAGATTCC                          |
| Primer 21 | ACCTGATCATGTAGATCGAATGGACTCCTAAATCCGTTCCAGCCGGGTTAGATTCC                          |
| Primer 22 | GAAAAGGAGGCTACATGCAAATATTAATAAATGGTGGGGGAAGGATTGCAACCTTC                          |
| Primer 23 | ACCGGAGCGATCGCAACCGGTCGGGCAGGAAGAGGGCCTATTTCCAT                                   |
| Primer 24 | ACTTACGCTTGCCACCATGGCTAGCGACTACAAGGACGACGACGACAAGGCAAGCAGTAACCTGATTAACAATTGCAAGAG |
| Primer 25 | TCCACCACACTGGACTAGTGGATCCTTATCATTAAACGGGCCCTTCCAGCAAATC                           |
| Primer 26 | GGGGGATACGGGGAAAAGGCCTCTTAAGAAAACCGCACTTGTC                                       |
| Primer 27 | GTAACGGCCACAAGTTCGTCGATTGGGCAGGAAGAGGGCCTATTTCC                                   |
| Primer 28 | TCGACGAACCTTGTGGCCGTTTACCCTCTTAAGAAAACCGCACTTGTC                                  |
| Primer 29 | CTGGTGGAGAACTTGCCGAATTGGGCAGGAAGAGGGCCTATTTCC                                     |
| Primer 30 | TTCGGCAAGTTCTCCACCAGCCTCTTAAGAAAACCGCACTTGTC                                      |
| Primer 31 | AGTGC GGTTTTTCTTAAGAGGTTGGGCAGGAAGAGGGCCTATTTCC                                   |
| Primer 32 | GGATACGGGGAAAAGGAGGCCTACATGC                                                      |
| Primer 33 | GTAACGGCCACAAGTTCGTCGATTGGGCAGGAAGAGGGCCTATTTCC                                   |
| Primer 34 | TCGACGAACCTTGTGGCCGTTTACCATGCAAATATTAATAAATGGTGGGGGAAG                            |
| Primer 35 | CTGGTGGAGAACTTGCCGAATTGGGCAGGAAGAGGGCCTATTTCC                                     |

|           |                                                                                             |
|-----------|---------------------------------------------------------------------------------------------|
| Primer 36 | AATTCGGCAAGTTCTCCACCAGACATGCAAATATTAATAAATGGTGGGGGAAG                                       |
| Primer 37 | TTTTAATATTTGCATGTAGGGGGCAGGAAGAGGGCCTATTC                                                   |
| Primer 38 | AGGGTCAGCTTGCCCTAGGTGGCATCG                                                                 |
| Primer 39 | TCGGCATGGACGAGCTGTACAAGCATCATCACCATCACCCTAAGCTGCCTATCAGAAG                                  |
| Primer 40 | ATGCCACCTAGGGCAAGCTGACCTGAAGTTC                                                             |
| Primer 41 | TTGTACAGCTCGTCCATGCCGAGAG                                                                   |
| Primer 42 | AGAACCTGGACCTGGACAAAAG TCGTAGTCCAAAGGAGAAGAAGCTGTTTACCGGTGTTG                               |
| Primer 43 | TCCCCATAATTTTTGGCAGAGGGAAAAAGATCTC                                                          |
| Primer 44 | GAGAACCCTGGACCTGGACAAAAGTCGAGGACGTGAC CACATGGTCTTCATG                                       |
| Primer 45 | TTTTTGGCAGAGGGAAA AAGATCTCACATG                                                             |
| Primer 46 | TTCAGCTGCTGAAACAGGCTGGCGACGTGGAAGAGAACCCTGGACCTGGACAAAAGTCGTAGCGTGACCACATGGTCTTCATG         |
| Primer 47 | TTTTTGGCAGAGGGAAAAAGATCTCACATG                                                              |
| Primer 48 | TGTCTCATATTTTTGGCAAAGAATTCATGTCCAAAGGAGAAGAAGCTGTTTACC                                      |
| Primer 49 | TTCTCTCCACGTCGCCAGCCTGTTTCAGCAGGCTGAAATGGTGGCGCCTCCAGACGCTTTTTTCATTTGGATCTTTGCTCAGGACTGTTTG |
| Primer 50 | AGCAAGGGCGAGGAGCTG                                                                          |
| Primer 51 | TGTCCCCATAATTTTTGGCAGAGGGAAAAAGATCTTTACTTGTACAGCTCGTCCATGCCGAGAG                            |
| Primer 52 | GTCTCATCATTTTTGGCAAAGAATTCGCCACCATGGTGAGCAAGGGCGAG                                          |
| Primer 53 | AACAGCTCCTCGCCTTGCTCACCGACTTTTGTCCAGGTCCAGG                                                 |
| Primer 54 | TGCCGCCAGAACACAGCTGAAGC                                                                     |
| Primer 55 | GAGTGCATCGGGCCTTGC                                                                          |
| Primer 56 | CGCAAGGCCGATCGACTCCTGTGTGGCTTCGATCCTACCGCTGAC                                               |
| Primer 57 | ACTATAACCCTGCAGCAGGTTG                                                                      |
| Primer 58 | ACCTGCTGCAGGTTATAGTGCCGCTGTGCCAACAAACAGTACGGTGTGGTGC                                        |
| Primer 59 | TCCACCACACTGGACTAGTGATCCTTATCATTAAACGGGCCCTTCCAGC                                           |

## 2.2 Working vector sequences. Related to STAR methods.

Vector 1 has **kanamycin** resistance; all other vectors have **ampicillin** resistance. Gene sequences are colour-coded using the following: **U6 promoter**, **PyIT** (anticodon **highlighted**), **EF1 promoter**, **PyIRS**, **CAG promoter and chimeric intron**, **eGFP** (150<sup>th</sup> codon **highlighted**), **TyrT** (anticodon **highlighted**), **TyrRS**, **mCherry**, linker, **P2A**, **sGFP(1-10)**, **sGFP(11)7x** (AGGA/TAG codon **highlighted**)

### 2.2.1 Vector 1: Pyl tRNA<sup>CUA(U25C)</sup>

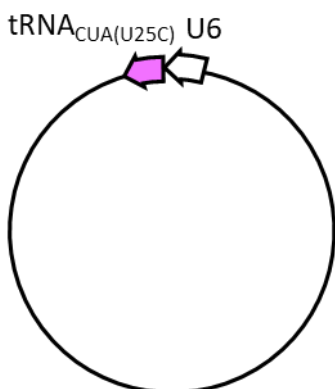



CTAAATTGTAAGCGTTAATATTTTTGTTAAAATTCGCGTAAATTTTTGTTAAATCAGCTCATTTTTTAACCAATAGGCCGAAATCGGC  
 AAAATCCCTTATAAATCAAAGAATAGACCGAGATAGGGTTGAGTGGCCGCTACAGGGCGCTCCCATTGCGCATTAGGCTGCG  
 CAACTGTTGGGAAGGGCGTTTTCGGTGCGGGCCTTTCGCTATTACGCCAGCTGGCGAAAAGGGGGATGTGCTGCAAGGCGATTA  
 AGTTGGGTAACGCCAGGGTTTTCCAGTCACGACGTTGTAACGACGGCCAGTGAGCGCGACGTAATACGACTCACTATAGGG  
 CGAATTGAAGGAAGGCCGTCAAGGCCGCATAGGCCTCTTAAGAAAAACCGCACTTGTCC**CGAAACCCCGGGAATCTAACCCGG**  
**CTGAACGGATTAGAGTCCGTTGATCTACATGATCAGGTTTCC**GGTGTTC**GTCC**TTTCCACAAGATATATAAAGCCAAGAAAT  
 CGAAACTTTTCAAGTTACGGTAAGCATATGATAGTCCATTTTAAAACATAATTTTAAAACCTGCAAACCTACCCAAGAAATTTACTT  
 TCTACGTCACGTATTTTGTACTAATATCTTTGTGTTTACAGTCAAATTAATTTCTAATTTATCTCTCTAACAGCCTTGATATGATGCG  
 AAATATGAAGGAATCATGGGAAATAGGCCCTTTCCTGCCCCAACCGGTTGCGATCGCTCCGGTGCCCGTCACT**GGGCAGAGCG**  
**CACATCGCCACAGTCCCGGAGAAGTTGGGGGGAGGGGTGCGCAATTGAACGGGTGCCTAGAGAAGGTGGCGCGGGGTAAC**  
**TGGGAAAGTGATGTCGTGACTGGCTCCGCCTTTTTCCCGAGGGTGGGGGAGAACCCTATATAAGTGCAGTAGTCGCCCGTGAAC**  
**GTTCTTTTTCCGAACGGGTTTGGCGCCAGAACACAG**CTGAAGCTTCGAGGGGCTCGCATCTCTCCTTACAGCGCCCGCCGCT  
 ACCTGAGGCCGCATCCACGCGGTTGAGTCGCGTTCGCGCCTCCCGCCTGTTGGTGCCTCTGAACTGCGTCCGCGCTCA  
 GGTAAGTTTAAAGCTCAGGTCGAGACCGGGCCTTTGTCCGGCGCTCCCTTGGAGCCTACCTAGACTCAGCCGGCTCTCCACGC  
 TTTGCCTGACCCTGCTTGTCAACTCTACGTCTTTGTTTCTGTTCTGCGCCGTTACAGATCCAAGCTGTGACCGGGCGC  
 TACTCTACAGATAGCGTTTAAACTTACGCTTGCCACCATGGCTAGCGCGGCCGACAGTACCAGGAAAGCGGAGCTACTAATTCAG  
 CCTGCTGAAGCAGGCTGGAGACCTGGAGGAGAACCCTGGACCTGACAAGAAGCCCTGAACACCCTGATCAGCGCCACAGGA  
 CTGTGGATGCCAGAACCAGCACCATCCACAAGATCAAGCACCACGAGGTGTCCCGTCCAAAATCTACATCGAGATGGCCTGC  
 GGCGATCACCTGGTCTCAACAACAGCAGAAGCAGCCGGACAGCCAGAGCCCTGCGGCACCACAAGTACAGAAAGACCTGCAA  
 GCGGTGCAGAGTGTCCGACGAGGACCTGAACAAGTTCTGACCAAGGCCAACGAGGACCAGACCAGCGTGAAAGTGAAGGTG  
 GTGTCCGCCCCACCCGGACCAAGAAAGCCATGCCAAAGAGCGTGGCCAGAGCCCCAACGCCCTGGAAAACACCGAAGCCG  
 CTCAGGCCAGCCAGCGGCAGCAAGTTCAGCCCCGCCATCCCCGTGTCTACCCAGGAAAGCGTACAGCGTCCCCGCCAGCGT  
 GTCCACCAGCATCTAGCATCTCAACCGGCCACAGCTTCTGCCCTGGTCAAGGGCAACACCAACCCCATCACCAGCATGTC  
 TGCCCTGTGACGGCCTCTGGCCCTCATGGCCTTCTTCTTCACTGCCCGCTTTCCAGTCCGGAAACCTGTCTGCCAGTGCAT  
 TAACATGGTCATAGCTGTTTCTTGCATATTGGGCGCTCTCCGCTTCTCGCTCACTGACTCGCTGCGCTCGGTGCTTGGGTA  
 AAGCCTGGGGTGCCTAATGAGCAAAAGGCCAGCAAAAGGCCAGGAACCGTAAAAAGGCCGCTTGTGCGGTTTTTCCATAGG  
 CTCCGCCCCCTGACGAGCATCACAAAATCGACGCTCAAGTCAGAGGTGGCGAAAACCCGACAGGACTATAAAGATAACCAGGC  
 GTTCCCCCTGGAAGCTCCCTCGTGCCTCTCCTGTTCCGACCCTGCCGCTTACCCGATACCTGTCCGCCTTCTCCCTTCGGG  
 AAGCGTGGCGCTTTCTCATAGCTCAGCTCAGCTGATAGGTATCTCAGTTCGGTGTAGGTGTCGCTCCAAGCTGGCTGTGCACGA  
 ACCCCCCGTTACGCCGACCCTGCGCTTATCCGGTAACTATCGTCTTGAGTCCAACCCGGTAAGACACGACTTATCGCCACT  
 GGCAGCAGCCACTGGTAACAGGATTAGCAGAGCGAGGTATGTAGGCGGTGCTACAGAGTCTTGAAGTGGTGGCCTAACTACG  
 GCTACACTAGAAGAAGTATTTGGTATCTGCGCTCTGCTGAAGCCAGTTACCTTCGAAAAAGAGTTGGTAGCTCTTGATCCGG  
 CAAACAAACCACCGCTGGTAGCGGTGGTTTTTTTTGTTTGAAGCAGCAGATTACGCGCAGAAAAAAGGATCTCAAGAAGATCTT  
 TTGATCTTTTCTACGGGCTGACGCTCAGTGGAAACGAAAACCTCAGTTAAGGGATTTTGGTCTAGATTATCAAAAAGGATCTT  
 CACCTAGATCTTTTTAAATTAATAAAGTTTAAATCAATCTAAAGTATATAGTAAACTTGGTCTGACAGTTATTAGAAAAAT  
 TCATCCAGCAGACGATAAAACGCAATACGCTGGCTATCCGGTGCCGCAATGCCATACAGCACCAGAAAACGATCCGCCATTCCG  
 CCGCCAGTTCTTCCGCAATATACGGGTGGCCAGCGCAATATCCTGATAACGATCCGCCACGCCAGACGGCCGCAATCAATA  
 AAGCCGCTAAAACGGCCATTTTCCACCATAATGTTCCGGCAGGCACGCATCACCATGGGTACCACCAGATCTTCGCCATCCGGC  
 ATGCTCGCTTTCAGACGCGCAACAGCTCTGCCGTGCCAGGCCCTGATGTTCTTATCCAGATCATCTGATCCACCAGGCC  
 GCTTCCATACGGGTACGCGCACGTTCAATACGATGTTTCGCTGATGATCAAAACGGACAGGTCCGCCGGTCCAGGGTATGCAGA  
 CGACGCATGGCATCCGCCATAATGCTCACTTTTTCTGCCGGCGCCAGATGGCTAGACAGCAGATCCTGACCCGGCACTTCGCC  
 AGCAGCAGCCAATCACGGCCGCTTCGGTACCACATCCAGCACCAGCCGCACACGGAACACCCGGTGGTGGCCAGCCAGCTCA  
 GACGCGCCGCTTTCATCCTGCAGCTCGTTACGCGCACCGCTCAGATCGGTTTTTCAAAACAGCACCAGGACGCCCTGCGCGCTC  
 AGACGAAACACCCGCCGATCAGAGCAGCCAATGGTCTGCTGCGCCCAATCATAGCCAAACAGACGTTCCACCCACGCTGCCGG  
 GCTACCCGATGCAGGCCATCTGTTCAATCACTCTTCTTTTCAATATTATTGAAGCATTATCAGGGTATTGTCTCATGAG  
 CGGATACATATTTGAATGTATTTAGAAAAATAAACAAAATAGGGGTTCCAGCGCACATTTCCCCGAAAAGTGCCAC

**2.2.2 Vector 55: 4x(Tyr tRNA<sub>CUA</sub>) TyrRS\* mCherry-P2A-TAG-sGFP(1-10)**

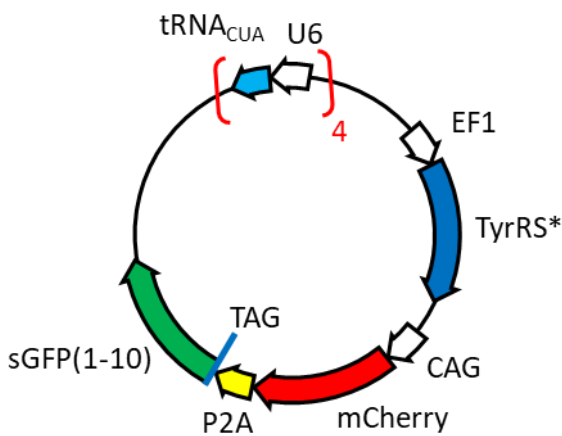

ACTCTTCTTTTTCAATATTATTGAAGCATTATCAGGGTTATTGTCTCATGAGCGGATACATATTTGAATGTATTAGAAAAATAA  
 CAAATAGGGGTTCCGCGCACATTTCCCCGAAAAGTGCCACCTAAATTGTAAGCGTTAATATTTTTGTTAAAATTCGCGTAAATTTTT  
 GTTAAATCAGCTCATTTTTTAACCAATAGGCCGAAATCGGCAAAATCCCTTATAAATCAAAGAATAGACCGAGATAGGGTTGAGT  
 GTTGTCCAGTTTGAACAAGAGTCCACTATTAAAGAACGTGGACTCCAACGTCAAAGGGCGAAAAACCGTCTATCAGGGCGAT  
 GGCCACTACGTGAACCATACCCTAATCAAGTTTTTTGGGGTTCGAGGTGCCGTAAGCACTAAATCGGAACCCCTAAAGGGAGC  
 CCCCATTAGAGCTTGACGGGGAAAGCCGGCGAACGTGGCGAGAAAGGAAGGAAGAAAGCGAAAGGAGCGGGCGCTAGGG  
 CGCTGGCAAGTGTAGCGGTACGCTGCGCGTAACCACCACACCCGCGCCTTAATGCGCCGCTACAGGGCGCGTCCCATTCC



CACCCGCGGACATCCCCGACTACTTGAAGCTGTCTTCCCCGAGGGCTTCAAGTGGGAGCGCGTGATGAACTTCGAGGACG  
GCGGCGTGGTGACCGTGACCCAGGACTCTCCCTGCAGGACGGCGAGTTTCATCTACAAGGTGAAGCTGCGCGGCACCAACT  
TCCCCTCCGACGGCCCCGTAATGCAGAAAGAAGACCATGGGCTGGGAGGCCTCCTCCGAGCGGATGTACCCCGAGGACGGCG  
CCCTGAAGGGCGAGATCAAGCAGAGGCTGAAGCTGAAGGACGGCGGCCACTACGACGCTGAGGTCAAGACCACCTACAAG  
GCCAAGAAGCCCGTGACGCTGCCCGGCGCCTACAACGTCAACATCAAGTTGGACATCACCTCCCACAACGAGGACTACACC  
ATCGTGAACAGTACGAACGCGCCGAGGGCCGCACTCCACCGCGGCATGGACGAGCTGTACGCGTCTGGAGGCGCCAC  
CAATTTACGCTGTGAACAGGCTGGCGACGTGGAAGAGAACCCTGGACCTGGACAAAAGTCGTAGTCCAAAGGAGAAGA  
ACTGTTACCCGGTGTGGCCAAATTTGGTTGAACTCGATGGTGATGTCAACGGACATAAGTTCTCAGTGAGAGGCGAAGGAG  
AAGGTGACGCCACCATTGAAAATTGACTCTTAAATTCATCTGTACTACTGGTAAACTTCTGTACCATGGCCGACTCTCGTAA  
CAACGCTTACGTACGGAGTTCAGTGCTTTTCGAGATACCCAGACCATATGAAAAGACATGACTTTTTTAAGTCGGCTATGCCTG  
AAGGTTACGTGCAAGAAAGAACAATTTTCGTTCAAAGATGATGAAAATATAAAACTAGAGCAGTTGTTAAATTTGAAGGAGAT  
ACTTTGGTTAACCGCATTGAAGTGAAGGAACAGATTTAAAGAAGATGGTAATATTCTTGGACACAACCTCGAATACAATTT  
AATAGTAAACGTATACACTGCTGATAAGCAAAAAGACGGAAATTAAGCGAATTTACAGACATGCCATAATGTAGAAGA  
TGGCAGTGTCAACTTGCCGACCATTACCAACAAAACACCCCTATTGGAGACGGTCCGGTACTTCTTCTGATAATCACTACCT  
CTCAACACAACAGTCTGAGCAAAGATCCAAATGAAAAATGA GAATTCCTCCTCAGGTGCAGGCTGCCTATCAGAAAGTGG  
TGGCTGGTGTGGCCAATGCCCTGGCTCACAATACTACTGAGATCTTTTTCCCTCTGCCAAAATATGGGGACATCATGAAGCC  
CCTTGAGCATCTGACTTCTGGCTAATAAAGGAAATTTATTTTCATTGCAATAGTGTGTTGGAATTTTTGTGTCTCTCACTCGGAAG  
GACATATGGGAGGGGTCGACAATCAACCTCTGGATTACAAAATTTGTGAAAGATTGACTGGTATTCTTAACATATGTTCTCCTTTT  
ACGCTATGTGGATACGCTGCTTTAATGCCCTTTGTATCATGCGTTAACTAAACTTTGTTTATTGCAGCTTATAATGTTTACAAATAAG  
CAATAGCATCACAATTTTACAATAAAGCAATTTTTTCACTGCATTCTAGTTGTGGTTTGTCCAACTCATCAATGTATCTTATCAT  
GTCTGGAATTGACTCAAATGATGTCAATTAGTCTATCAGAAGCTATCTGGTCTCCCTTCCGGGGGACAAGACATCCCTGTTTAATA  
TTTAAACAGCAGTGTTCCAAACCTGGGTTCTTATATCCCTTGCTCTGGTCAACCAGGTTGCAGGGTTTCTGTCTCACAGGAAC  
GAAGTCCCTAAGAAACAGTGGCAGCCAGGTTAGCCCCGAATTGACTGGATTCTTTTTAGGGCCCATTGGTATGGCTTTTT  
CCCCGTATCCCCCAGGTGTCTGCAGGCTCAAAGAGCAGCGAGAACGTTTCAGAGGAAAGCGATCCCGTCCACCTTCCCGT  
GCCCGGGCTGTCCCCGCACGCTGCCGGCTCGGGGATGCGGGGGGAGCGCCGACCGGAGCGGAGCCCCGGGCGGCTCGCT  
GCTGCCCCCTAGCGGGGAGGGACGTAATTACATCCCTGGGGGCTTTGGGGGGGGCTGTCCCTGATATCTATAACAAGAAAA  
TATATATAATAAGTTATCACGTAAGTAGAACATGAAATAACAATATAATTATCGTATGAGTTAAATCTTAAAAGTCACGTAAGA  
TAATCATGCGTCATTTTACTCACGCGGTCGTTATAGTTCAAATCAGTGACACTTACCGCATTGACAAGCAGCCCTACGGGAG  
CTCAAAGCGCGACTGAGATGTCTAAATGCACAGCAGCGGATTCCGCTATTTAGAAAGAGAGACAAATTTTCAAGAATGCAT  
GCGTCAATTTTACGACACTATCTTTCTAGGGTTAATCTAGCTGCATCAGGATCATATCGTCGGGCTTTTTTCCGGCTCAGTCAT  
CGCCCAAGCTGGCGCTATCTGGGCATCGGGGAGGAAGAAGCCCGTGCCTTTTCCCGCAGGTTGAAGCGGCATGGAAAGAGTT  
TGCCGAGGATGACTGCTGCTGCATTGACGTTGAGCGAAAACGCACGTTTACCATGATGATTCGGGAAGGTGTGGCCATGCACGC  
CTTTAACGGTGAACCTGTTTCGTTTACGGCCACCTGGGATACCAAGTTCGTCGCGGCTTTTCCGGACACAGTTCGGATGGTCAGCCC  
GAAGCGCATCAGCAACCCGAACAATACCGGCGACAGCCGAACTGCCGTGCCGGTGTGCAGATTAATGACAGCGGTGCGGCG  
CTGGGATATTACGTCAGCGAGGACGGGTATCTTGGCTGGATGCCGCAGAAATGGACATGGATACCCCGTGAGTTACCCCGCGG  
GCGCGCTTGGCGTAATCATGGTCATAGCTGTTTCTGTGAAATTTGTTATCCGCTCACAATCCACACAACATACGAGCCGGAA  
GCATAAAGTGTAAAGCCTGGGGTGCCTAATGAGTGAGCTAACTCACATTAATTGCGTTGCGCTCACTGCCCGCTTTCCAGTCGG  
GAAACCTGTGCTGCCAGCTGCATTAATGAATCGGCCAACGCGCGGGGAGAGGCGGTTTGCATTTGGGCGCTCTTCCGCTTCC  
TCGCTCACTGACTCGCTGCGCTCGGTCGTTCCGCTGCGGCGAGCGGTATCAGCTCACTCAAAGGCGGTAATACGGTTATCCAC  
AGAATCAGGGGATAACGCAGGAAAGAACATGTGAGCAAAAAGCCAGCAAAAAGCCAGGAACCGTAAAAAGCCCGCTTGGCTGG  
CGTTTTTCCATAGGCTCCGCCCCCTGACGAGCATCACAATAATCGACGCTCAAGTCAGAGGTGGCGAAACCCGACAGGACTAT  
AAAGATACCAGGCGTTTCCCCTGGAAGCTCCCTCGTGCCTCTCCTGTTCCGACCCTGCCGCTTACCGGATACCTGTCCGCCT  
TTCTCCCTTCGGGAAGCGTGGCGCTTTCTCATAGCTCACGCTGTAGGTATCTCAGTTCGGTGTAGGTGCTTCCGCTCCAAGCTGG  
GCTGTGTGCACGAACCCCGGTTACGCCCGACCGCTGCGCCTTATCCGGTAACTATCGTCTTGTAGTCCAACCCGTAAGACACG  
ACTTATCGCCACTGGCAGCAGCCACTGGTAACAGGATTAGCAGAGCGAGGTATGTAGGCGGTGCTACAGAGTTCTTGAAGTGGT  
GGCCTAACTACGGCTACACTAGAAGGACAGTATTTGGTATCTGCGCTCTGCTGAAGCCAGTTACCTTCGGAAAAAGAGTTGGTA  
GCTCTTGATCCGGCAAACAACCCAGGCTGGTAGCGGTGGTTTTTTTTGTTTGAAGCAGCAGATTACGCGCAGAAAAAAGGAT  
CTCAAGAAGATCCTTTGATCTTTTCTACGGGGTCTGACGCTCAGTGAACGAAAACCTCACGTTAAGGGATTTTGGTCAAGATT  
ATCAAAAAGGATCTTACCTAGATCCTTTTAAATTAATAAAGTAAATCAATCTAAAGTATATATGAGTAAACTTGGTCTGAC  
AGTTACCAATGCTTAATCAGTGAGGCACCTATCTCAGCGATCTGTCTATTTTCGTTCCATCCATAGTTGCCTGACTCCCCGCTCGTGA  
GATAACTACGATACGGGAGGGCTTACCATCTGGCCCCAGTGTGCAATGATACCCGCGAGACCCACGCTCACCGGCTCCAGATTT  
ATCAGCAATAAACAGCCAGCCGGAAGGGCCGAGCGCAGAAGTGGTCTGCAACTTTATCCGCTCCATCCAGTCTATTAATTG  
TTGCCGGGAAGCTAGAGTAAGTAGTTCCGCCAGTTAATAGTTTGCACAACGTTGTTGCCATTGCTACAGGCATCGTGGTGTACCG  
CTCGTCTTTGGTATGGCTTCAATCAGCTCCGGTCCCAACGATCAAGGCGAGTTACATGATCCCCCATGTTGTGAAAAAAGCG  
GTTAGCTCCTTCGGTCTCCGATCGTTGTCAAGTAAGTTGGCCGAGTGTATCACTCATGGTTATGGCAGCACTGCATAATT  
CTCTTACTGTCAATGCCATCCGTAAGATGCTTTTTCTGTGACTGGTGAGTACTCAACCAAGTCACTTCTGAGAATAGTGTATGCGGCG  
ACCGAGTTGCTCTTGGCCGGCTCAATACGGGATAATACCGCGCCACATAGCAGAACTTTAAAAGTGTCTCATCATTGAAAACGT  
TCTTCCGGGGCAAAAACCTCAAGGATCTTACCGCTGTTGAGATCCAGTTCGATGTAACCCACTCGTGCACCCAACTGATCTTCCAG  
CATTTTTACTTTACCAGCGTTTCTGGGTGAGCAAAAACAGGAAGGCAAAATGCCGCAAAAAGGGAATAAGGGCGACACGGA  
AATGTTGAATACTCAT

2.2.3 Vector 56: 4x(Pyl tRNA<sub>UCCU(Ev2)</sub>) PylRS mCherry-P2A-AGGA-sGFP(11)

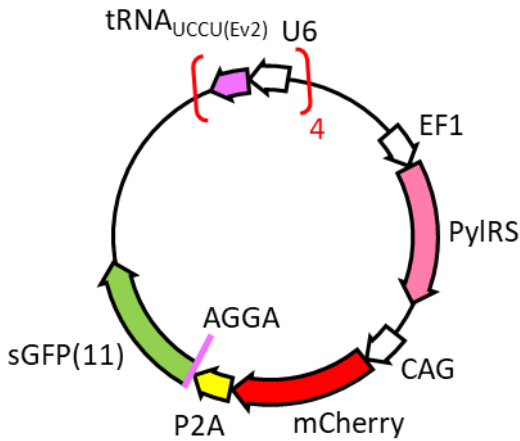

ACTCTTCCTTTTTCAATATTATTGAAGCATTATCAGGGTTATTGTCTCATGAGCGGATACATATTTGAATGTATTTAGAAAAATAA  
CAAATAGGGGTTCCGCGCACATTTCCCGGAAAAGTGCCACCTAAATTGTAAGCGTTAATATTTTGTAAAATTCGCGTTAAATTTTT  
GTTAAATCAGCTCATTTTTTAACCAATAGGCCGAAATCGGCAAAATCCCTTATAAATCAAAGAATAGACCGAGATAGGGTTGAGT  
GTTGTTCCAGTTTGAACAAGATCCACTATTAAGAACGTGGACTCCAACGTCAAAGGGCGAAAAACCGTCTATCAGGGCGAT  
GGCCACTACGTGAACCATCACCTAATCAAGTTTTTGGGGTCGAGGTGCCGTAAAGCACTAAATCGGAACCCCTAAAGGGAGC  
CCCCGATTTAGAGCTTGACGGGGAAAAGCCGGCGAACGTGGCGAGAAAAGGAAGGAAAGAAAAGCGAAAAGGAGCGGGCGCTAGGG  
CGCTGGCAAGTGTAGCGGTACGCTGCGCGTAACCACCACACCCGCCGCGCTTAATGCGCCGCTACAGGGCGCGTCCCATT  
GCCATTGAGGCTGCGCAACTGTTGGGAAGGGCGATCGGTGCGGGCCTCTTCGCTATTACGCCAGCTGGCGAAAGGGGGATGT  
GCTGCAAGGCGATTAAGTTGGGTAACGCCAGGGTTTTCCAGTCACGACGTTGTA AAAACGACGGCCAGTGAGCGCGCCTCGTT  
CATTACGTTTTTGAACCCGTGGAGACGGGCAGACTCGCGGTGCAAAATGTGTTTTACAGCGTGATGGAGCAGATGAAGATGCT  
CGACACGCTGCAGAACACGAGCTAGATTAACCTAGAAAAGATAATCATATTGTACGTACGTTAAAGATAATCATGCGTAAAATT  
GACGCATGTGTTTTATCGTCTGTATATCGAGGTTTTATTTAATTTGAATAGATATTAAGTTTTATTATTTACACTTACATACTA  
ATAATAAATTCAACAAACAATTTATTTATGTTATTTATTTATTA AAAAAAACA AAAA ACTCAAATTTCTTCTATAAAGTAACAAA  
TTATGAGGGACAGCCCCCCCCAAAGCCCCAGGGATGTAATTACGTCCCTCCCCCGCTAGGGGGCAGCAGCGAGCCGCCCG  
GGGCTCCGCTCCGGTCCGGCGCTCCCCCGCATCCCCGAGCCGGCAGCGTGCGGGGACAGCCCGGGCACGGGGAAGGTGG  
CACGGGATCGCTTTCTCTGACGCTTCTCGTGTCTTTGAGCCTGCAGACACCTGGGGGATACGGGAAAAGGCCTTTAA  
GAAAAACCGCACTTGTCCGGAAACCCCGGGAATCTAACCCGGCTGAAGCGGATAGGAAGCCCTTCGATCTACATGATCAGG  
TTTCCGGTGTTCGTCTTTCCACAAGATATATAAAGCCAAGAAATCGAAATACTTTCAAGTTACGGTAAGCATATGATAGTCCATT  
TAAAAACATAATTTAAAACTGCAAACCTACCAAGAAATTATTACTTTCTACGTACGATTTTTGTACTAATATCTTTGTGTTTACAG  
TCAAATTAATCTAATTTATCTCTAACAGCCTTGATATGCAATATGAAGGAATCATGGGAAATAGGCCCTTCTCCTGCC  
CAATCGACGAACCTTGCGCGTTTACCCTCTTAAGAAAAACCGCACTTGTCCGGAAACCCCGGGAATCTAACCCGGCTGAAGC  
GGATAGGAAGCCCTTCGATCTACATGATCAGGTTTCCGGTGTTCGTCTTTCCACAAGATATATAAAGCCAAGAAATCGAAAT  
ACTTTCAAGTTACGGTAAGCATATGATAGTCCATTTTAAAAACATAATTTAAAACTGCAAACCTACCAAGAAATTATTACTTTCTACG  
TCACGTATTTGTACTAATATCTTTGTGTTTACAGTCAAATTAATTCTAATTATCTCTAACAGCCTTGATCGTATATGCAAAT  
GAAGGAATCATGGGAAATAGGCCCTTCTCCTGCCAATTCGGCAAGTTCTCCACCAGCCTCTTAAGAAAAACCGCACTTGTCCG  
GAAACCCCGGGAATCTAACCCGGCTGAAGCGGATAGGAAGCCCTTCGATCTACATGATCAGGTTTCCGGTGTTCGTCTCTT  
CCACAAGATATATAAAGCCAAGAAATCGAAATACTTTCAAGTTACGGTAAGCATATGATAGTCCATTTTAAAAACATAATTTTAAAC  
TGCAAACCTACCAAGAAATTTACTTTCTACGTACGATTTTTGTACTAATATCTTTGTGTTTACAGTCAAATTAATTCTAATTATC  
TCTCTAACAGCCTTGATCGTATATGCAAATATGAAGGAATCATGGGAAATAGGCCCTTCTCCTGCCAACCTCTTAAGAAAAAC  
GCACTTGTCCCTAAAAACCGCACTTGTCCGGAAACCCCGGGAATCTAACCCGGCTGAAGCGGATAGGAAGCCCTTCGATCTA  
CATGATCAGGTTTCCGGTGTTCGTCTTTCCACAAGATATATAAAGCCAAGAAATCGAAATACTTTCAAGTTACGGTAAGCATAT  
GATAGTCCATTTTAAAAACATAATTTAAAACTGCAAACCTACCAAGAAATTATTACTTTCTACGTACGATTTTTGTACTAATATCT  
TGTGTTTACAGTCAAATTAATTCTAATTATCTCTAACAGCCTTGATCGTATATGCAAATATGAAGGAATCATGGGAAATAGGCC  
CTCTTCTGCCAACCGGTTGCGATCGCTCCGGTGCCGTCAGTGGGCAGAGCGCACATCGCCACAGTCCCGGAGAAGTTGG  
GGGGAGGGGTCCGCAATTGAACGGGTGCCTAGAGAAGGTGGCGCGGGGTAAACTGGGAAAGTGATGTCGTGACTGGCTCCG  
CCTTTTTCCCGAGGGTGGGGGAGAACCGTATATAAGTGCAGTAGTCGCCGTGAACGTTCTTTTTCGCAACGGGTTTTGCCGCCAG  
AACACAGCTGAAGCTTCGAGGGGCTCGCATCTCTCTTACGCGCCCGCCGCTACCTGAGGCCGCCATCCACGCCGGTTGA  
GTCGCGTTTCCGCTCCCGCCTGTGGTGCCTCCTGAACTGCGTCCGCCGCTAGGTAAGTTTAAAGCTCAGGTCGAGACCG  
GGCCTTTGTCCGGCGCTCCCTTGGAGCCTACCTAGACTCAGCCGGCTCTCCACGCTTTGCCTGACCCTGCTTGTCTCAACTCTAC  
GTCTTTGTTTCTGTTTCTGTTCTGCGCCGTTACAGATCCAAGCTGTGACCGCGCCTACTCTACAGATAGCGTTTAAACTTACGCT  
TGCCACCATTGGCTAGCGACTACAAGGACGACGACGACAAGGACAAGAAGCCCTGAACACCCTGATCAGCGCCACAGGACT  
GTGGATGTCCAGAACCAGCCATCCACAAGTCAAGCACCACGAGGTGTCCCGTCCAAAATCTACATCGAGATGGCCTGC  
GGCATCACCTGGTTCGCAACAACAGCAGAGCAGCGGACGAGGACCCCTGCGGCACCACAAGTACAGAAAGACCTGC  
AAGCGGTGCAGAGTGTCCGACGAGGACCTGAACAAGTTCTGACCAAGGCCAACGAGGACACGAGCCGTTGAAAGTGAAG  
GTGGTGTCCGCCCCACCCGGACCAAGAAAGCCATGCCAAGAGCGTGGCCAGAGCCCCAACGCCCTGGAAAACACCGAA  
GCCGCTCAGGCCAGCCAGCGGCAGCAAGTTAGCCCCGCCATCCCCGTGTCTACCAGGAAAGCGTCAGCGTCCCCGCC  
AGCGTGTCCACCAGCATCTAGCATCTCAACCCGGCCACAGCTTCTGCCCTGGTCAAGGGCAACACCAACCCCATCACCA  
GCTGTCTGCCCTGTGCAAGCTCTGCCGACCCCTGACCAAGTCCAGACCGACCGGCTGGAAGTCTCTCTGACCCCAA  
GGACGAGATCAGCCTGAACACGCGGAAGCCCTTCCGGAGCTGGAAGAGCAGCTGCTGAGCCGCGGAAGAAGGACCTCC  
AGCAAATCTACGCCGAGGAACGGGAGA ACTACCTGGGCAAGCTGGAAGAGAGATACCCGGTCTTCTGTTGACCGGGCT  
TCCTGGAATCAAGAGCCCATCCTGATCCCCCTGGAGTACATCGAGCGGATGGGCATCGACAACGACACCGAGCTGAGCA  
AGCAGATTTCCGGGTGGACAAGA ACTTCTGCCTGCGGCCATGCTGGCCCCAACCTGTACA ACTACCTGCGGAAACTGGA  
TCGCGCTCTGCCGACCCCATCAAGATTTTCGAGATCGGCCCTGCTACCGGAAAGAGAGCGGACGGCAAAGAGCACCTGGA  
AGAGTTTACAATGCTGAACTTTTGCAGATGGGCAGCGGCTGCACCAGAGAGA ACTGGAATCCATCATCACCAGACTTTCTGA

ACCACCTGGGGATCGACTTCAAGATCGTGGGCGACAGCTGCATGGTGTACGGCGACACCCTGGACGTGATGCACGGGACC  
TGAAGTGTCTAGCGCCGTCGTGGGACCCATCCCTCTGGACCGGAGTGGGCGATCGATAAGCCCTGGATCGGAGCCGGCT  
TCGGCCTGGAACGGCTGCTGAAAGTCAAGCAGACTTTAAGAACATCAAGCGGGCTGCCAGAAGCGAGAGCTACTACAACG  
GCATCAGCACCAACCTGTGATGATAAGGATCCACTAGTCCAGTGTGGTGAATTGACATTGATTATTGACTAGTTATTAATAGTA  
ATCAATTACGGGGTCATTAGTTTCATAGCCCATATATGGAGTTCGCGTACATAACTTACGGTAAATGGCCCCGCTGGCTGACCG  
CCCAACGACCCCCGCCATTGACGTCAATAATGACGTATGTTCCCATAGTAACGCCAATAGGGACTTTCATTGACGTCAATGGG  
TGGAGTATTACGGTAAACTGCCACTTGGCAGTACATCAAGTGTATCATATGCCAAGTACGCCCTTATTGACGTCAATGACGG  
TAAATGGCCCCGCTGGCATTATGCCAGTACATGACCTTATGGACTTTCTACTTGGCAGTACATCTACGTATTAGTCATCGCT  
ATTACCATGGTTCGAGGTGAGCCCCAGTTCTGCTTCACTCTCCCCATCTCCCCCCCCCTCCCCACCCCAATTTTGTATTTATTTAT  
TTTTTAATTATTTTGTGCAGCGATGGGGGCGGGGGGGGGGGGGGGCGCGCGCCAGGCGGGGCGGGGCGGGGCGAGGGGCGG  
GGCGGGGCGAGGCGGAGAGGTGCGGCGGCAGCCAATCAGAGCGGCGCGCTCCGAAAATTTCTTTTATGGCGAGGCGGGCGG  
CGGCGGCGGGCTATAAAAAAGCAAGCGCGGCGGGGAGTTCGCTTCCGCCCCGTGCCCGCTCCGCGC  
GCCTCGCGCGCCCGCCCGCTGACTGACCGCTTACTCCACAGGTGAGCGGGGCGGGACCGGCTTCTCTCCGGGCT  
GTAATTAGCGCTTGGTTAATGACGGCTCGTTTCTTTCTGTGGCTGCGTGAAGCCTTAAAGGGCTCCGGGAGGGCCCTTTGT  
GCGGGGGGGAGCGGCTCGGGGGGTGCGTGCCTGTGTGTGCGTGGGAGCGCCGCTGCGGCCCGCGCTGCCCGGCGG  
TGTGAGCGCTGCGGGCGCGGCGCGGGCTTTGTGCGCTCCGCTGTGCGCGAGGGGAGCGCGGCCGGGGCGGTGCCCG  
CGGTGCGGGGGGGCTGCGAGGGGAACAAAGGCTGCGTGCGGGGTGTGTGCGTGGGGGGGTGAGCAGGGGGGTGTGGCGCG  
GCGGTGCGGCTGTAACCCCCCTGCACCCCTCCCGAGTTGCTGAGCAGCGCCGCTTCCGGTGCGGGCTCCGATCG  
GGCGTGGCGGGGCTGCGCTGCCGGCGGGGGTGGCGCAGGTGGGGTGGCGGGGCGGGGCGGGCGCCCTCGGG  
CCGGGGAGGGCTCGGGGGAGGGGCGCGGCGGCCCGGAGCGCGGGCGGCTGTGAGGCGCGGCGAGCCGAGCCATTG  
CCTTTTATGTAATCGTGCAGAGGGCGCAGGGACTTCTTTGTCCAAATCTGTGCGGAGCCGAAATCTGGGAGGCGCGCC  
GCACCCCTCTAGCGGGCGCGGGGCGAAGCGGTGCGCGCCCGCAGGAAGGAAATGGGCGGGGAGGGCTTCTGTCGCTCG  
CCGCGCCCGCTCCCTTCTCCCTCTCCAGCTCGGGCTGTCGCGGGGGAGCGGCTGCTTCCGGGGGAGCGGGGCGAG  
GCGGGTTCCGCTTCTGCGTGTGACCGCGGCTCTAGAGCCTTCTGTAACCATGTTTCATGCTTCTTTTCTTCTTCTAGC  
CTGGCAACGTGCTGGTTATTGTGCTGTCTCATATTTGGCAAAGAATTCGCCACCATGGTGAGCAAGGGCGAGGAGGATAA  
CATGGCCATCATCAAGGAGTTCATGCGCTTCAAGGTGCACATGGAGGGCTCCGTGAACGGCCACGAGTTCGAGATCGAGGG  
CGAGGGCGAGGGCCGCCCTACGAGGGCACCCAGACCGCAAGCTGAAGGTGACCAAGGGTGGCCCCCTGCCCTTCGCT  
GGGACATCTGTCCCTCAGTTCATGTACGGCTCAAGGCTACGTGAAGCACCCCGCGACATCCCGACTACTTGAAGCT  
GTCCTTCCCGAGGGCTTCAAGTGGGAGCGCTGATGAACCTCGAGGACGGCGGCTGGTGACCGTACCCAGGACTCTC  
CCTGCAGGACGGCGAGTTCATCTACAAGGTGAAGCTGCGCGCACCAACTTCCCTCCGACGCCCCGTAATGCAGAAGAA  
GACCATGGGCTGGGAGGCTCCTCCGAGCGGATGTACCCGAGGACGGCGCCTGAAGGGCGAGATCAAGCAGAGGCTGA  
AGCTGAAGGACGGCGGCCACTACGACGCTGAGGTCAAGACCACCTACAAGGCCAAGAAGCCCGTGCAGCTGCCCGGCGCT  
ACAACGTCAACATCAAGTGGACATCACTCCACAACGAGGACTACACCTCGTGAACAGTACGAACCGCGCGAGGGCC  
GCCACTCCACCGGGCATGGACGAGCTGACGCTGAGGACTGACCAATTCAGCCTGTGAACAGGCTGGGAGG  
TGGAAAGAGAACCCTGGACCTGGACAAAAGTTCAGGACGCGACCAATTCAGCCTGTGAACAGGCTGGGAGG  
CAGGTGGCTCTGGAGGTAGAGATCATATGGTCTCCACGAATACGTTAACCGCCGAGGCATCACTGGCGGTAGTGGAGGACG  
CGACCATATGGTACTACATGAATATGTCAATGCAGCCGGAATAACCGGAGGGTCCGGAGGCCGGGATCACATGGTGTGCTGCAT  
GAGTATGTGAACGCGGGGGTATAACTGGTGGTTCGGGCGGACGAGACCATATGGTGTCTTACGAATACGTAACCGGACGT  
GGCATTACTGGCGGATCAGGTGGCAGGATCATGTTACTCCATGAGTACGTGAACGCTGCTGGAATCACAGGCGGTAGC  
GGCGGTCCGGACCATATGGTCTGCAGAAATATGTCAATGTCTGCGGATACCGGGCGCAAATTCATGTGA GAATTCACTCC  
TCAGGTGCAGGCTGCCTATCAGAAGGTGGTGGCTGGTGTGGCCAATGCCCTGGCTCACAAATACCACTGAGATCTTTTTCCCTC  
TGCCAAAATATGGGGACATCATGAAGCCCTTGAGCATCTGACTTCTGGCTAATAAAGGAAATTTATTTTCATTGCAATAGTGT  
GTTGGAATTTTTGTGTCTCTCACTCGGAAGGACATATGGGAGGGTTCGACAATCAACCTCTGGATTACAAAATTTGTGAAAGATT  
GACTGGTATTTAACTATGTTGCTCCTTTACGCTATGTGGATACGCTTTAATGCCTTTGTATCATGCGTTAACTAACTTGT  
TTATTCAGCTTATAATGGTTACAAATAAGCAATAGCATACAAATTTACAAATAAAGCATTTTTTCACTGCACTTAGTTGT  
GTTTGTCCAAACTCATCAATGTATCTTATCATGTCTGGAATTGACTCAAATGATGTCAATTAGTCTATCAGAAGTATCTGGTCTCC  
CTTCCGGGGGACAAGACATCCCTGTTAATATTTAAACAGCAGTGTCCCAAATGGGTTCTTATATCCCTTGTCTGGTCAACCA  
GGTTGCAGGGTTTCTGTCTCACAGGAACGAAGTCCCTAAAGAAACAGTGGCAGCCAGGTTAGCCCCGGAATTGACTGGATT  
CCTTTTTAGGGCCCATTGGTATGGCTTTTTCCCGTATCCCCCAGGTGCTGTGCAGGCTCAAAGAGCAGCGGAGAAGCGTTCAG  
AGGAAGCGATCCCGTCCACCTTCCCGTCCCGGGCTGTCGCCGACGCTGCCGCTCGGGGATCGGGGGGAGGCGCCG  
GACCGGAGCGGAGCCCCGGGCGGCTGCTGCTGCCCTAGCGGGGAGGGACGTAATTACATCCCTGGGGCTTTGGGGG  
GGGGCTGTCCCTGATATCTATAACAAGAAAATATATATAAAGTTATCACGTAAGTAGAATGAAATAACAATATAATTATCG  
TATGAGTTAAATCTTAAAGTACGTAAGATAATCATGCGTCAATTTGACTCACGCGGTGCTTATAGTTCAAATCAGTGACACT  
TACCGCATTGACAAGCACGCTCACGGGAGCTCCAAGCGGCGACTGAGATGTCTAAATGCACAGCGACGGATTTCGCGCTATTT  
AGAAAGAGAGAGCAATATTTCAAGAATGCATGCGTCAATTTACGCAGACTATCTTTAGGGTTAATCTAGCTGCATCAGGATCA  
TATCGTGGGTCTTTTTTCCGGCTCAGTCATCGCCCAAGCTGGCGTATCTGGGCATCGGGGAGGAAGAAGCCCGTGCCTTTTC  
CCGCGAGGTTGAAGCGGCATGGAAAGAGTTTCCGAGGATGACTGCTGCTGCATTGACGTTGAGCGAAAACGCACGTTTACCAT  
GATGATTCCGGGAAGGTGTGGCCATGCACGCCTTAAACGGTGAAGTTCGTTTACGGCCACCTGGGATACCAGTTCGTCGCGGCT  
TTTCCGGACACAGTTCGGATGGTCAGCCCGAAGCGCATCAGCAACCCGAACAATACCGGCGACCGCGAACTGCCGTGCCG  
GTGTGCAGATTAATGACAGCGGTGCGGCGCTGGGATATTACGTACGCGAGGACGGGTATCCTGGCTGGATGCCGCAGAAATGG  
ACATGGATACCCCGTGAATACCCGGCGGGCGCTGGCGTAATCATGGTCATAGCTGTTTCTGTGTGAAATTTTATCCCG  
TCACAATTTCCACACAACATACGAGCCGGAAGCATAAAGTGTAAAGCCTGGGGTGCCTAATGAGTGAGCTAACTCACATTAATTGC  
GTTGCGCTCACTGCCGCTTTCCAGTCCGGAAACCTGTCGTGCCAGCTGCATTAATGAATCGGCCAACGCGGGGAGAGGCG  
GTTTGCATTTGGGCGCTTCCGCTTCCCTGCTCACTGACTGCTGCGCTCGGTGCTTCCGCTGCGGCGAGCGGTATCAGCT  
CACTCAAAGGCGGTAATACGGTTATCCACAGAATCAGGGGATAACGCGAGGAAGAACATGTGAGCAAAGGCCAGCAAAAGGCC  
AGGACCGTAAAAGGCGCGTGTGGCTTTTTCCATAGGCTCCGCCCCCTGACGAGCATCACAAAATCGACGCTCAAGT  
CAGAGGCGGAAACCCGACAGGACTATAAAGATACCAGGCTTTCCCTCGGAAGCTCCCTCGTGCCTCTCCTGTTCCGAC  
CCTGCCGCTTACCGGATACCTGTCCGCTTTCTCCCTTCCGGAAGCGTGGCGCTTTCTCATAGCTCACGCTGTAGGTATCTCAG  
TTCGGTGTAGGTCGTTCCGCTCAAGCTGGGCTGTGTGCACGAACCCCGTTCCAGCCGACCGCTGCGCCTTATCCGTAACCT  
ATCGTCTTGAAGTCAACCCGGTAAGACACGACTTATCGCCACTGGCAGCAGCCACTGGTAACAGGATTAGCAGAGCGAGGTATG  
TAGGCGGTGCTACAGAGTTCTTGAAGTGGTGGCTAATACGCGCTACACTAGAAGGACAGTATTTGGTATCTGCGCTGCTGTA  
AGCCAGTTACCTTCGGAAGAGTTGGTAGCTTTGATCCGGCAAACAAACACCCTGGTGGTAGCGGTTTTTTTGTGAA  
GCAGCAGATTACGCGCAGAAAAAAGGATCTCAAGAAGATCCTTTGATCTTTTCTACGGGGTCTGACGCTCAGTGAACGAAAC  
TCACGTTAAGGGATTTTGGTCATGAGATTATCAAAAAGGATCTTACCTAGATCCTTTTAAATAAAAATGAAGTTTTAAATCAATC

TAAAGTATATATGAGTAACTTGGTCTGACAGTTACCAATGCTTAATCAGTGAGGCACCTATCTCAGCGATCTGTCTATTTTCGTTT  
 ATCCATAGTTGCCTGACTCCCCGCTCGTGTAGATAACTACGATACGGGAGGGCTTACCATCTGGCCCCAGTGCTGCAATGATACC  
 GCGAGACCCACGCTCACCGGCTCCAGATTTATCAGCAATAAACCCAGCCAGCCGGAAGGGCCGAGCGCAGAAGTGGTCCTGCAA  
 CTTTATCCGCTCCATCCAGTCTATTAATTGTTGCCGGAAGCTAGAGTAAGTAGTTCGCCAGTTAATAGTTTGGCAACGTTGTT  
 GCCATTGCTACAGGCATCGTGGTGTACAGCTCGTCTGTTGGTATGGCTTATTTCAGCTCCGTTCCCAACGATCAAGGCGAGTT  
 ACATGATCCCCCATGTTGTGCAAAAAAGCGGTTAGCTCCTTCGGTCTCCGATCGTTGTGAGAAGTAAGTTGGCCGAGTGTAT  
 CACTCATGGTTATGGCAGCACTGCATAATTCTTACTGTATGCCATCCGTAAGATGCTTTTCTGTGACTGGTGAAGTACTCAACC  
 AAGTCATTCTGAGAAATAGTGTATGCGGCGACCCAGTTGCTCTTGCCTGGCGTCAATACGGGATAATACCGCGCCACATAGCAGA  
 ACTTTAAAAGTGCTCATCATTGGAAAACGTTCTTCGGGGCGAAAACCTCTCAAGGATCTTACCGCTGTTGAGATCCAGTTGATGT  
 AACCCACTCGTGCACCCAAGTATCTTACGATCTTTTACTTTCACCAGCGTTTCTGGGTGAGCAAAAAACAGGAAGGCAAAATGC  
 CGCAAAAAAGGGAATAAGGGCGACACGGAAATGTTGAATACTCAT

2.2.4 Vector 57: 4x(Tyr tRNA<sub>CUA</sub>) TyrRS\* sGFP(1-10)-TAG-sGFP(11)

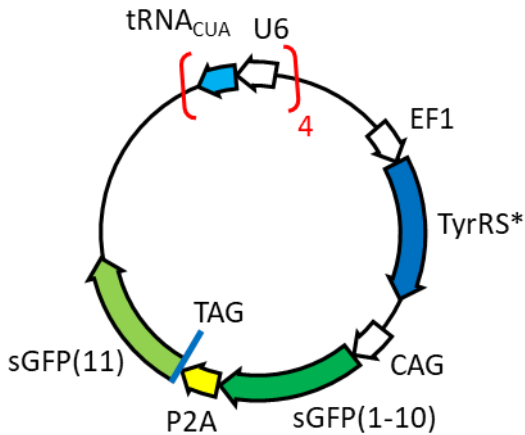

ACTCTTCCTTTTTCAATATTATTGAAGCATTATCAGGGTTATTGTCTCATGAGCGGATACATATTTGAATGTATTTAGAAAAATAA  
 CAAATAGGGGTTCCGCGCACATTTCCCGAAAAGTGCCACCTAAATGTAAGCGTAAATATTTGTTAAAATTCGCGTTAAATTTT  
 GTTAAATCAGCTCATTTTTTAAACCAATAGCCGAAATCGGCAAAATCCCTTATAAATCAAAGAATAGACCGAGATAGGGTTGAGT  
 GTTGTCCAGTTTGAACAAGAGTCCACTATTAAGAAGCTGGACTCCAACGTCAAAGGGCGAAAACCGTCTATCAGGGCGAT  
 GGCCCACTACGTGAACCATCACCTAATCAAGTTTTTTGGGGTCGAGGTGCCGTAAAGCACTAAATCGGAACCCATAAGGGGAGC  
 CCCCATTAGAGCTTGACGGGGAAGCCGGCGAACGTGGCGAGAAAGGAAGGGAAGAAAGCGAAAGGAGCGGGCGCTAGGG  
 CGCTGGCAAGTGTAGCGGTACGCTGCGGTAACCACCACACCCGCCGCTTAATGCGCCGTACAGGGCGCGTCCCATTC  
 GCCATTACGGCTGCGCAACTGTTGGGAAGGGCGATCGGTGCGGGCCTCTTCGCTATTACGCCAGCTGGCGAAAGGGGGATGT  
 GCTGCAAGGCGAATAAGTTGGGTAACGCCAGGGTTTTCCAGTACGACGTTGTA AACGACGGCCAGTGAGCGCGCCTCGTT  
 CATTACGTTTTTGAACCCGTGGAGGACGGGACGACTCGCGGTGCAAAATGTGTTTTACAGCGTGATGGAGCAGATGAAGATGCT  
 CGACACGCTGCAGAACCGCAGCTAGATTAACCTAGAAAGATAATCATTGTGACGTACGTTAAAGATAATCATGCGTAAAT  
 GACGCATGTGTTTTATCGTCTGTATATCGAGGTTATTTAATTTGAATAGATATTAAGTTTTATTATTTACACTTACATACTA  
 ATAATAAATTCAACAAACAATTTATTTATGTTTATTTATTTAATAAAAAACAAAACTCAAAATTTCTTCTATAAAGTAAACAACTT  
 TTATGAGGGACAGCCCCCCCCAAAGCCCCAGGGATGTAATTACGTCCCTCCCCCGTAGGGGGCAGCAGCGAGCCGCCCC  
 GGGCTCCGCTCCGGTCCGGCGCTCCCCCGCATCCCCGAGCCGGCAGCGTGCGGGGACAGCCGGGCACGGGGAAGGTGG  
 CACGGGATCGTTTTCTCTGAACGCTTCTCGCTGCTTTTGAGCCTGCAGACACCTGGGGGATACGGGGAAAAGGCCTTTAA  
 GAAAAACCGCACTTGTCTGGTGGGGGAAGGATTTCGAACCTTCGAAGTCTGTGACGGCAGATTAGAGTCTGCTCCCTTTGGCC  
 GCTCGGGAACCCACC GGTGTTTCGTCTTTCCACAAGATATATAAAGCCAAGAAATCGAAATACTTTCAAGTTACGGTAAGCAT  
 ATGATAGTCCATTTTAAACATAATTTTAAACTCGAAACTACCCAAGAAATATTACTTTCTACGTCACGATTTTTGTACTAATATC  
 TTTGTGTTACAGTCAAATTAATTCTAATCTCTCTAACAGCCTTGATATCGTATATGCAAAATGAAGGAATCATGGGAAATAGG  
 CCCTCTTCTGCCAATCGCAACTTGTGGCCGTTTACCTCTTAAAGAAAAACCGCACTTGTCTGGTGGGGGAAGGATTTCGAA  
 CCTTCGAAGTCTGTGACGGCAGATTAGAGTCTGCTCCCTTTGGCCGCTCGGGAACCCACC GGTGTTTCGTCTTTCCACA  
 GATATATAAAGCCAAGAAATCGAAATACTTTCAAGTTACGGTAAGCATATGATAGTCCATTTTAAACATAATTTTAAACTGCAAA  
 CTACCCAAGAAATTTACTTTCTACGTCACGATTTTTGTACTAATATCTTTGTGTTTACAGTCAAATTAATTCTAATTTATCTCTAA  
 CAGCCTTGATCGTATATGCAAAATGAAGGAATCATGGGAAATAGGCCCTTCTTCTGCCAATTCGGCAAGTTCTCCACCAGCC  
 TCTTAAGAAAAACCGCACTTGTCTGGTGGGGGAAGGATTTCGAACCTTCGAAGTCTGTGACGGCAGATTAGAGTCTGCTCCCT  
 TGGCCGCTCGGGAACCCACC GGTGTTTCGTCTTTCCACAAGATATATAAAGCCAAGAAATCGAAATACTTTCAAGTTACGGTA  
 AGCATATGATAGTCCATTTTAAACATAATTTTAAACTGCAAACTACCCAAGAAATTTACTTTCTACGTCACGATTTTTGTACTA  
 ATATCTTTGTGTTTACAGTCAAATTAATTCTAATTTATCTCTCTAACAGCCTTGATATCGTATATGCAAAATGAAGGAATCATGGGAA  
 ATAGGCCCTTCTTCTGCCAACCTCTTAAGAAAAACCGCACTTGTCTTAAACCGCACTTGTCTGGTGGGGGAAGGATTTCGA  
 ACCTTCGAAGTCTGTGACGGCAGATTAGAGTCTGCTCCCTTTGGCCGCTCGGGAACCCACC GGTGTTTCGTCTTTCCACA  
 AGATATATAAAGCCAAGAAATCGAAATACTTTCAAGTTACGGTAAGCATATGATAGTCCATTTTAAACATAATTTTAAACTGCAAA  
 ACTACCCAAGAAATTTACTTTCTACGTCACGATTTTTGTACTAATATCTTTGTGTTTACAGTCAAATTAATTCTAATTTATCTCTAA  
 ACAGCCTTGATCGTATATGCAAAATGAAGGAATCATGGGAAATAGGCCCTTCTTCTGCCAACCGGTTGCGATCGCTCCGGT  
 GCCCGTCAGTGGGACAGCGCACATCGCCACAGTCCCCGAGAAGTTGGGGGGAGGGGTGGGCAATTGAACGGGTGCTTAGA  
 GAAGTGGCGCGGGTAACTGGGAAAGTATGCTGTACTGGCTCCGCTTTTTCCGAGGGTGGGGGAGAACCCTATATA  
 AGTGCAGTAGTCGCCGTGAACGTTCTTTTTGCAACCGGTTTTGCCGCCAGAACACAGCTGAAGCTTCGAGGGGCTCGCATCTCT  
 CCTTACGCGCCCGCCCTACCTGAGGCCGCCATCCACGCCGTTGAGTCGCGTTCTGCCGCTCCCGCCTGTGGTGCCT  
 CCTGAAGTGCCTCCGCGTCTAGGTAAGTTTAAAGCTCAGGTCGAGACCGGCCCTTTGTCGGCGCTCCCTTGGAGCCTACCTA  
 GACTCAGCCGGCTCTCCACGCTTTGCCTGACCCTGCTTGTCTCAACTCTACGCTTTTGTCTTTCTGTTCTGCGCCGTACAG  
 ATCCAAGCTGTGACCGGCGCCTACTCTACAGATAGCGTTTAAACTTACGCTTGCCACCATGGCTAGCGACTACAAGGACGACG

ACGACAAGGCAAGCAGTAACCTTGATTAACAATTGCAAGAGCGGGGGCTGGTAGCCAGGTGACGGACGAGGAAGCGTTAG  
CAGAGCGACTGGCGCAAGGCCGATCGCACTCGTGTGGCTTCGATCTACCCTGACAGCTTGCATTTGGGGCATCTTGT  
CCATTGTTATGCCTGAAACGCTTCCAGCAGGCGGGCCACAAGCCGGTTGCGCTGGTAGGCGGCGGACGGGTCTGATTGGC  
GACCCGAGCTTCAAAGCTGCCGAGCGTAAGCTGAACACCGAAGAACTGTTCAAGGAGTGGGTGGACAAAATCCGTAAGCAG  
GTTGCCCGTTCCTCGATTCGACTGTGGAGAAAACCTCTGCTATCGCGCCAATAATTATGACTGGTTCGGCAATATGAATGT  
GCTGACCTTCTGCGCGATATTGGCAAACACTTCCGTTAACAGATGATCAACAAAAGAAGCGGTTAAGCAGCGTCTCAACC  
GTGAAGTACAGGGGATTCGTTCACTGAGTTTTCTACAACCTGCTGCAGGGTTATAGTATGGCCTGTTGAACAAACAGTAC  
AAGCGCAATAGGGACTTTCCATTGACGTCAATGGGTGGAGTATTTACGTTAAACTGCCACTTGGCAGTACATCAAGTGA  
TCAGGTGTTTGGCCTGACCGTCCGCTGATCACTAAAGCAGATGGCACCAAAATTTGGTAAAACCTGAAGGCGGGCAGTCTGG  
TTGGATCCGAAGAAAACAGCCCGTACAAATCTACCAGTCTGGATCAACACTGCGCGTCCGACGTTTACCCTTCTGAA  
GTTCTTCACTTTATGAGCATTGAAGAGTCAACGCCCTGGAAGAAGAAGATAAAAAACAGCGGTAAGCACCAGCGCGCCAG  
TATGTACTGGCGGAGGACTGCTGTTGTTACGGTGAAGAAGTTTACAGGCGGCAAAACGTTATCCGAATGCTGT  
TCAGCGGTTCTTTGAGTGCCTGAGTGAAGCGACTTCAAGACTGGCGCAGGACGGCGTACCGTGGTTGAGATGGAAAA  
GGGCGCAGACCTGATGCAGGCACTGGTCTGATTCTGAACTGCAACCTTCCGTTGGTCAAGCAGTAAAACCTATCGCCTCCAAT  
GCCATCACCATTAACGGTGA AAAACAGTCCGATCCTGAATACTTCTTTAAGAAGAAGATCGTCTGTTTGGTCTGTTTACCTTA  
CTGCGTCCGCGTAAAAAGAACTACTGCTGATTGCTGGAAGGGCCCGTTAATGATAAGGATCCACTAGTCCAGTGTGGTG  
GAATTGACATTGATTATTGACTAGTTATTAATAGTAATCAATTACGGGGTCAATTAGTTTCATAGCCCATATATGGAGTTCGCGGTTAC  
ATAACTTACGGTAAATGCCCGCCTGGCTGACCGCCCAACGACCCCGCCATTGACGTCAATAATGACGTATGTTCCCATAGT  
AACGCCAATAGGGACTTTCCATTGACGTCAATGGGTGGAGTATTTACGTTAAACTGCCACTTGGCAGTACATCAAGTGA  
ATGCCAAGTACGCCCCCTATTGACGTCAATGACGGTAAATGGCCCGCTGGCATTATGCCAGTACATGACCTTATGGGACTTTT  
CTACTTGGCAGTACATCTAGTATTAGTACATCGCTATTACCATGGTTCGAGGTGAGCCCACTTCTGCTTCACTTCCCATCTC  
CCCCCTCCCGCCCAATTTTGTATTTATTTTAAATTTTGTGACGCGATGGGGGCGGGGGGGGGGGGGGGGGGGGGGG  
CGCCAGGCGGGGCGGGCGGGGGCGAGGGGGCGGGGGCGGGGGCGAGGCGGAGAGGTGCGGGCGGACCCAATCAGAGCGCGCG  
GCTCCGAAAGTTTCTTTTATGGCGAGGCGGGCGGGCGGGCCCTATAAAAAAGCGAAGCGCGGGCGGGCGGGGAGTCTGCT  
GCGTTGCCCTTCCCGCTGCCCGCTCCGCGCGCCCTCGCGCGCCCGCCCGGCTCTGACTGACCGCGTTACTCCACAGG  
TGAGCGGGCGGGACGGCCCTTCTCCTCCGGGCTGTAATTAGCGCTTGGTTAATGACGGCTCGTTTCTTTTCTGTGGCTGCGTG  
AAAGCCTTAAAGGGCTCCGGGAGGGCCCTTTGTGCGGGGGGAGCGGCTCGGGGGGTGCGTGCCTGTGTGTGTGCGTGGG  
AGCGCGCGTGCAGCCCGCGCTGCCCGCGGCTGTGAGCGCTGCGGGCGCGGCGCGGGGCTTTGTGCGCTCCGCGTGTG  
GCGAGGGGAGCGCGGGCGGGGGCGGTGCCCGCGGTGCGGGGGGCTGCGAGGGGAACAAAGGCTGCGTGGGGGTGTG  
GCGTGGGGGGTGTAGCAGGGGGTGTGGGCGCGGCGGTGCGGCTGTAACCCCCCTGCACCCCCCTCCCGAGTTGCTGAG  
CACGGCCCCGCTTCCGGTGCAGGGGCTCCGTACGGGGCGTGGCGCGGGGCTCGCGTGCAGGGCGGGGGTGGCGGCAGGT  
GGGGGTGCCGGGCGGGCGGGGCCGCTCGGGCCGGGGAGGGCTCGGGGAGGGGCGCGGCGCCCGGAGCGCCGG  
CGGCTGTGCGAGGCGGGCGGCGAGCCATTGCCTTTATGGTAACTCGTGCAGAGGGGCGCAGGGACTTCCCTTTGTCCAAA  
TCTGTGCGGAGCCGAAATCTGGGAGCGCCGCCACCCCTTAGCGGGCGGGCGAAGCGGCTGCGCGCCGCGGAGG  
AGGAAATGGGCGGGGAGGGCCCTTCTGCGTGCCTGCGCGCCCGCTCCCTTCTCCCTTCCAGCCTCGGGGCTGTCGCGGG  
GGGACGGCTGCCTTCCGGGGGACGGGGCAGGGCGGGGTTCCGGCTTGTGGCGTGTGACCGCGGCTCTAGAGCCTCTGCTA  
ACCATGTTTCATGCCTTCTTCTTTTCCCTACAGCTCCTGGGCAACGTGCTGGTTATTGTGCTGTCTCATCATTTTGGCAAAGAATC  
GCCACCATGTCCAAGGAGAAGAACTGTTTACCGGTGTTGTGCCAATTTTGGTTGAACTCGATGGTGTATGCAACGGACATAA  
GTTCTCAGTGAGAGCGGAAGGAGAAGGTGACCGACCATTGAAATTTGACTCTTAAATTCATGCTACTACTGTTAACTC  
CTGACCATTGGCCACTCTGTAACAACGCTTACGTACGGAGTCAAGTCTTTTCGAGATACCAGACCATGAAAAGACAT  
GACTTTTTTAAGTCGGCTATGCCTGAAGGTTACGTGCAAGAAAGAACAATTTCTGTTCAAAGATGATGGAAAATATAAACTAG  
AGCAGTTGTTAAATTTGAAGGAGATACTTTGGTTAACCGCATTGAACTGAAAGGAACAGATTTTAAAGAAGATGGTAATATTCT  
TGGACACAAACTCGAATACAATTTAATAGTCATAACGTATACATCACTGCTGATAAGCAAAGAACGGAATTAAGCGAATT  
TCACAGTACGCCATAATGTAGAAGATGGCAGTGTCAACTTCCGACCATTAACAACAAACCCCTATTGGAGACGGTCCG  
GTACTTCTTCTGATAATCACTACTCTCAACGACAAACAGTCTGAGCAAAGATCCAAATGAAAAAGCGTCTGGAGGCGCCAC  
CAATTTACGCCTGCTGAAACAGGCTGGCGACGTGGAAGAGAACCCTGGACCTGGACAAAAGTCTGCGTACCACATGGT  
CTTCATGAGTATGTAATGCTGCTGGGATTACAGGTGGCTCTGGAGGTAGAGATCATATGGTTCTCCACGAATACGTTAACGC  
CGCAGGCATCACTGCGGTAGTGGAGGACGCGACCATATGGTACTACATGAATATGTAATGCAGCCGGAATAACCGGAGG  
GTCCGGAGCCGGGATCACATGGTGTGCATGAGTATGTAACGGCGGGGATAACTGGTGGGTGCGGGCGGACGAGACCA  
TATGGCTTCCAGCAATACGTAACCGCAGCTGACTTACTGGCGGATCAGGTGGCAGGGATCATGTTACTCATGAGTAC  
GTGAACGCTGCTGAAATCAGAGCGGTAGCGGCGGTGCGGACCATATGGTCTGCACGAATATGTAATGCTGCGGGTATCA  
CCGGCGGCAAAATTCATGTGA GAATTCACTCCTCAGGTGCAGGCTGCCTATCAGAAGGTGGTGGCTGGTGTGGCCAATGCCCTG  
GCTCACAAATACCACTGAGATCTTTTCCCTCTGCCAAAAATATGGGGACATCATGAAGCCCTTGGACATCTGACTTCTGGCTA  
ATAAAGGAAATTTATTTTCAATGCAATAGTGTGTTGGAATTTTTTGTGCTCTCACTCGGAAGGACATATGGGAGGGGTGCA  
CAACCTCTGGATTACAAAATTTGTGAAAGATTGACTGGTATTCTTAACTATGTTGCTCCTTTTACGCTATGTGGATACGCTGCTTTA  
ATGCCTTTGTATCATGCGTTAACTAACTTGTATTGACGCTTATAATGGTTACAAATAAAGCAATAGCATCACAAATTTACAAA  
TAAAGCATTTTTTCACTGCATTCTAGTTGTGGTTTTGTCCAACTCATCAATGTATCTTATCATGTCTGGAATTGACTCAAATGATG  
TCAATTAGTCTATCAGAAGCTATCTGGTCTCCCTTCCGGGGACAAGACATCCCTGTTTAAATTTAAACAGCAGTGTCCCAAAC  
TGGGTTCTTATATCCCTTGTCTGGTCAACCAGGTTGCAGGGTTTTCTGTCTCACAGGAACGAAGTCCCTAAAGAAACAGTGGC  
AGCCAGGTTAGCCCGGAATTGACTGGATTCTTTTTAGGGCCATTGGTATGGCTTTTTCCCGTATCCCCCAGGTGTCTG  
CAGGCTCAAAGAGCAGCGAGAAGCGTTACAGAGAAAAGCATCCCGTCCACCTTCCCGTCCCGGGCTGTCCCGCACGCT  
GCCGGCTCGGGGATGCGGGGGGAGCGCCGACCGGAGCGGACGCCCGGGCGGCTCGCTGCTGCCCTTAGCGGGGGAGGG  
ACGTAATTACATCCCTGGGGGCTTTGGGGGGGGGCTGTCCCTGATATCTATAACAAGAAAATATATATAATAAGTTATCACGTA  
AGTAGAACATGAAATAACAATATAATTATCGTATGAGTTAAATCTTAAAAGTACGTA AAAAGATAATCATGCGTCATTTTACTCAC  
GCGGTGCTTATAGTTCAAATCAGTGACACTTACCAGATTGACAAGCAGCGCTCACGGGAGCTCCAAGCGGGCAGTGAATGTC  
CTAAATGCACAGCAGCGATTCCGCTATTTAGAAAAGAGAGCAATATTTCAAAGATGCATGCGTCAATTTTACGCAGACTATC  
TTTTAGGGTTAATCTAGCTGCATCAGGATATCTGCGGCTTTTTCCGCTCAGTCACTGCCCAAGCTAGCGCTATCTGG  
GCATCGGGGAGGAAGAAGCCCGTGCCTTTTCCCGGAGGTTGAAGCGGCATGGAAGAAGTGTGGCAGGATGACTGCTGCTGC  
ATTGACGTTGAGCGAAAACGCACGTTTACCATGATGATTCCGGAAAGGTGTGGCCATGCACGCCTTAAACGGTGAACGTTTGGT  
CAGGCCACCTGGGATACCAGTTCGTGCGGGTTTTCCGGACACAGTTCCGGATGGTCAAGCCGAAAGCGCATCAGCAACCCGAA  
CAATACCGGCGACAGCCGGAATGCCGTGCCGGTGTGCAGATTAATGACAGCGGTGCGGGCGTGGGATTAACGTCACCGAG  
GACGGGTATCTGGTGGATGCCGAGAAATGGACATGGATACCCCGTGAGTTACCCGGCGGGCGGCTTGGCTAATCATG  
TCATAGCTGTTTCTGTGTGAAATTTGTTATCCGCTCACAATTCACACAACATACGAGCCGGAAGCATAAAGTGTAAAGCCTGGG  
GTGCTAATGAGTGAGCTAACTCACATTAATTGCGTTGCGCTCACTGCCCGCTTCCAGTCCGGAAACCTGTGCTGCCAGCTGC

ATTAATGAATCGGCCAACGCGCGGGGAGAGGCGGTTTGCATTTGGGCGCTCTTCCGCTTCTCGTCACTGACTCGTGCGC  
 TCGGTGCTTCGGCTGCGGCGAGCGGTATCAGCTCACTCAAAGGCGGTAATACGGTTATCCACAGAATCAGGGGATAACGCAGG  
 AAAGAACATGTGAGCAAAAAGGCCAGCAAAAAGGCCAGGAACCGTAAAAAGGCCGCGTTGCTGGCGTTTTTCCATAGGCTCCGCC  
 CCCCTGACGAGCATCAAAAAATCGACGCTCAAGTCAGAGGTGGCGAAACCCGACAGGACTATAAAGATACCAGGCGTTTCCCC  
 CTGGAAGCTCCCTCGTGCCTCTCCTGTTCCGACCCTGCCGTTACCGGATACCTGTCCGCTTTCTCCCTTCGGAAGCGTGG  
 CGTTTTCTCATAGCTCACGCTGTAGGTATCTCAGTTCCGTGTAGGTGCTTCGCTCCAAGCTGGGCTGTGTGCACGAACCCCCCG  
 TTCAGCCCAGCCGCTGCGCCTTATCCGGTAACATCGTCTTGTAGTCCAACCCCGTAAAGACACGACTTATCGCCACTGGCAGCAG  
 CCACTGGTAACAGGATTAGCAGAGCGAGGTATGTAGGCGGTGCTACAGAGTTCTTGAAGTGGTGGCCTAACTACGGCTACACTA  
 GAAGGACAGTATTTGGTATCTGCGCTCTGCTGAAGCCAGTTACCTTCGGAAGAGTTGGTAGCTCTTGATCCGGCAAAACAAAC  
 CACCGCTGGTAGCGGTGGTTTTTTTTGTTTGAAGCAGCAGATTACGCGCAGAAAAAAGGATCTCAAGAAGATCCTTTGATCTTT  
 TCTACGGGGTCTGACGCTCAGTGAACGAAAACCTCACGTTAAGGGATTTTTGGTCAATGAGATTATCAAAAAGGATCTTCACCTAGA  
 TCCTTTTAAATAAAAATGAAGTTTTAAATCAATCTAAAATATATAGTAACTTGGTCTGACAGTTACCAATGCTTAATCAGTGA  
 GGCACCTATCTCAGCGATCTGTCTATTTTCGTTTCATCCATAGTTGCCTGACTCCCCGTCGTGTAGATAACTACGATACGGGAGGGC  
 TTACCATCTGGCCCCAGTGTGCAATGATACCGCGAGACCCACGCTCACCGGCTCCAGATTTATCAGCAATAAACAGCCAGCC  
 GGAAGGGCCGAGCGCAGAAGTGGTCTGCAACTTTATCCGCTCCATCCAGTCTATTAATTGTTGCCGGAAGCTAGAGTAAGT  
 AGTTCGCCAGTTAATAGTTTGCACAACGTTGTTGCCATTGCTACAGGCATCGTGGTGTACGCTCGTCTGTTGGTATGGCTTCAT  
 TCAGTCCGGTTCACACGATCAAGGCGAGTTACATGATCCCCATGTTGTGCAAAAAAGCGGTTAGCTCCTTCGGTCTCCGA  
 TCGTTGTGAGAAGTAAGTTGGCCGAGTGTATCACTCATGGTTATGGCAGCACTGCATAATTCTTACTGTCATGCCATCCGTA  
 AGATGCTTTTTCTGTGACTGGTGAAGTACTCAACCAAGTCATTCTGAGAATAGTGTATGCGGCGACCGAGTTGGCTTTGCCCGGCGT  
 CAATACGGGATAATACCGCGCCACATAGCAGAAGTTAAAAGTGTCTCATATTGAAAACGTTCTTCGGGGCGAAAACCTCTCAAG  
 GATCTTACCGCTGTTGAGATCCAGTTTCGATGTAACCCACTCGTGCACCAACTGATCTTCAGCATCTTTACTTTACCCAGCGTTT  
 CTGGGTGAGCAAAAACAGGAAGGCAAAAATGCCGCAAAAAGGGGAATAAGGGCGACACGGAAATGTTGAATACTCAT

**2.2.5 Vector 58: Pyl tRNA<sub>CUA(U25C)</sub> PylRS mCherry-P2A-eGFP(150TAG)**

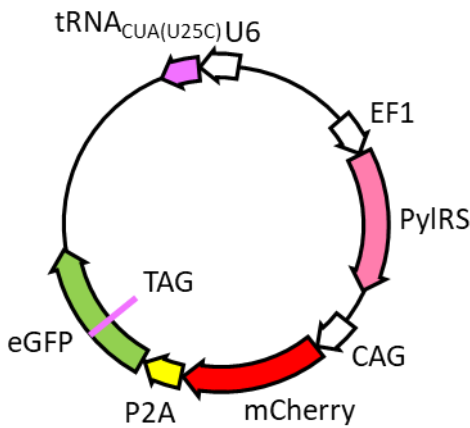

ACTCTTCCTTTTTCAATATTATTGAAGCATTATCAGGGTTATTGTCTCATGAGCGGATACATATTTGAATGTATTAGAAAAATAAA  
 CAAATAGGGGTTCCGCGCACATTTCCCCGAAAAGTGCCACCTAAATTGTAAGCGTTAATATTTTTGTTAAAATTCGCGTTAAATTTTT  
 GTTAAATCAGCTCATTTTTTAACCAATAGGCCGAAATCGGCAAAATCCCTTATAAATCAAAGAATAGACCGAGATAGGGTTGAGT  
 GTTGTCCAGTTTGGAAACAAGAGTCCACTATTAAGAACGTGGACTCCAACGTCAAAGGGCGAAAAACCGTCTATCAGGGCGAT  
 GGCCCACTACGTGAACCATACCCTAATCAAGTTTTTTGGGGTCGAGGTGCCGTAAGCACTAAATCGGAACCCCTAAAGGGAGC  
 CCCCATTAGAGCTTGACGGGGAAAGCCGGCGAACGTGGCGAGAAAGGAAGGGAAGAAAGCGAAAGGAGCGGGCGCTAGGG  
 CGCTGGCAAGTGTAGCGGTACGCTGCGCGTAACCACCACACCCGCGCGCTTAATGCGCCGCTACAGGGCGCGTCCCATTC  
 GCCATTCAGGCTGCGCAACTGTTGGGAAGGGCGATCGGTGCGGGCCTCTTCGCTATTACGCCAGCTGGCGAAAGGGGGATGT  
 GCTGCAAGCGGATTAAGTTGGTAAACGCCAGGGTTTTCCAGTACAGCGTTGTAACACGACGGCCAGTGAGCGCGCTCGTT  
 CATTACGTTTTTGAACCCGTGGAGGACGGGCAGACTCGCGGTGCAAAATGTGTTTTACAGCGTGTATGGAGCAGATGAAGATGCT  
 CGACACGCTGCAGAACACGCAGCTAGATTAACCCTAGAAAGATAATCATATTGTGACGTACGTTAAAGATAATCATGCGTAAAT  
 GACGCATGTGTTTTATCGTCTGTATATCGAGGTTATTTAATTTGAATAGATATTAAGTTTTATTATTTACACTTACATACTA  
 ATAATAAATTCAACAAACAATTTATTTATGTTTATTTATTTAATAAAAAACAAAACCTCAAAATTTCTTCTATAAAGTAAACAACTT  
 TTATGAGGGACAGCCCCCCCCAAAGCCCCAGGGATGTAATTACGTCCTCCCCGCTAGGGGGCAGCAGCGAGCCGCCCCG  
 GGGTCCGCTCCGGTCCGGCGCTCCCCCGCATCCCCGAGCCGGCAGCGTGCGGGGACAGCCCGGGCACGGGGAAGGTGG  
 CACGGGATCGCTTCTCTGAACGCTTCTCGCTGCTCTTTGAGCCTGCAGACACCTGGGGGGATACGGGGAAAAGGCCATAAAA  
 CCGCACTTGTCCGGAAACCCCGGGAATCTAACCCGGCTGAACGGATTAGAGTCCGTTTCGATCTACATGATCAGGTTCCGGT  
 GTTTCGTCCTTTCCACAAGATATAAAGCCAAGAAATCGAAATCTTTCAAGTTACGGTAAGCATATGATAGTCCATTTTAAACA  
 TAATTTAAAACGCAACTACCAAGAATTTACTTTCTACGTCACGTATTTTGTACTAATATCTTTGTGTTTACAGTCAAATTA  
 ATTCTAATATCTCTCTAACAGCCTTGATCGTATATGCAAAATGAAAGGAATCATGGGAAATAGGCCCTTCTCCGCAACCCGG  
 TTGCGATCGCTCCGGTGCCTGTCAGTGGGAGAGCGCACATCGCCACAGTCCCGGAGAAGTTGGGGGGAGGGGTGGCAAT  
 TGAACGGGTGCTAGAGAAGGTGGCGCGGGTAAACTGGGAAAGTGTGCTGTACTGGCTCCGCTTTTTCCGAGGGTGG  
 GGGAGAACCGTATATAAGTGCAGTAGTCCCGTGAACGTTCTTTTTGCAACGGGTTTGCCGCCAGAACACAGCTGAAGCTTCG  
 AGGGGCTCGCATCTCTCTTACGCGCCCCGCGCCCTACTGAGGCCGCTCCACGCGGTTGAGTGCCTGTTCCGCGCTC  
 CCGCTGTGGTGCCTCCTGAAGTGCCTCCGCGCTAGGTAAGTTTAAAGCTCAGGTCGAGACCCGGCCTTTGTCCGCGCTC  
 CTTGGAGCCTACCTAGACTCAGCCGGCTCTCCACGCTTTGCCTGACCCTGCTTGTCTCAACTTACGCTTTTGTCTTTCTG  
 TTCTGCGCGTTACAGATCCAAGCTGTGACCGCGCCTACTCTACAGATAGCGTTTAAACTTACGCTTGCACCATGGCTAGCG  
 ACTACAAGGACGACGACGACAAGGACAAGAAGCCCTGAACACCCTGATCAGCGCCACAGGACTGTGGATGTCCAGAACC  
 GCACCATCCAAAGATCAAGCACACGAGGTGTCCCGTCCAAAATCTACATCGAGATGGCTGCGCGCATCACCTGGTGTG  
 CAACAACAGCAGAAGCAGCCGACAGCCGCTGCGCCACCAAGTACAGAAAGCAAGCTGCAAGCGGTGCAGAGTGT  
 CCGACGAGGACTGAACAAGTTCTGACCAAGGCCAACGAGGACCAGCCGCTGAAAGTGAAGTGGTGGTCCGCCCCA  
 CCGGACCAAGAAAAGCCATGCCAAGAGCGTGGCCAGAGCCCCAAGCCCTGGAAAACACCGAAGCCGCTCAGGCCAG





CTCACATTAATTGCGTTGCGCTCACTGCCCGCTTTCCAGTCGGGAAACCTGTCGTGCCAGCTGCATTAATGAATCGGCCAACGC  
 GCGGGAGAGGCGGTTTGCATTGGGCGCTCTCCGCTTCTCGCTCACTGCTGCTGCGCTCGGTCGTTCCGGCTGCGGC  
 GAGCGGTATCAGCTCACTCAAAGGCGGTAATACGTTATCCACAGAATCAGGGGATAACGCAGGAAAGAACATGTGAGCAAAA  
 GCCAGCAAAAGGCCAGGAACCGTAAAAAGGCCGCGTTGCTGGCGTTTTTCCATAGGCTCCGCCCCCTGACGAGCATCACAAA  
 AATCGACGCTCAAGTCAGAGGTGGCGAAACCCGACAGGACTATAAAGATACCAGGCGTTTCCCCCTGGAAGCTCCCTCGTGCG  
 CTCTCCTGTTCCGACCCCTGCCGCTTACCGGATACCTGTCGCGCTTCTCCCTTCGGAAGCGTGGCGCTTTCTCATAGCTCAGC  
 CTGTAGGTATCTCAGTTCGGTGTAGGTCGTTCCGCTCCAAGCTGGGCTGTGTGCACGAACCCCGCTTACGCCGACCCGCTGCG  
 CCTTATCCGGTAACTATCGTCTTGGTCCAACCCGGTAAGACACGACTTATCGCCACTGGCAGCAGCCACTGGTAACAGGATTA  
 GCAGAGCGAGGTATGTAGGCGGTGCTACAGAGTTCTTGAAGTGGTGGCCTAACTACGGCTACACTAGAAGGACAGTATTTGGTA  
 TCTGCGCTCTGCTGAAGCCAGTTACCTTCGAAAAAGAGTTGGTAGCTCTTATCGCGCAAACAAACCACCGCTGGTAGCGGTG  
 GTTTTTTTGTGCAAGCAGCAGATTACGCGCAGAAAAAAGGATCTCAAGAAGATCCTTTGATCTTTTCTACGGGGTCTGACGCT  
 CAGTGAACGAAAACCTCACGTTAAGGGATTTTGGTCATGAGATTATCAAAAAGGATCTTACCTAGATCCTTTAAATTAATAAATG  
 AAGTTTTAAATCAATCTAAAGTATATAGTAAACTTGGTCTGACAGTTACCAATGCTTAATCAGTGAGGCACCTATCTCAGCGAT  
 CTGTCTATTTTCGTTTCATCCATAGTTGCCTGACTCCCCGCTGTGTAGATAACTACGATACGGGAGGGCTTACCATCTGGCCCCAGT  
 GCTGCAATGATACCGCGAGACCCACGCTCACCGGCTCCAGATTTATCAGCAATAAACAGCCAGCCGGAAGGGCCGAGCGCAG  
 AAGTGGTCTGCAACTTTATCCGCTCCATCCAGTCTATTAATTGTTGCCGGAAGCTAGAGTAAGTAGTTCGCCAGTTAATAGTT  
 TGCGCAACGTTGTTGCCATTGCTACAGGCATCGTGGTGTACGCTCGTCTGTTGGTATGGCTTCATTACAGCTCCGTTCCCAAC  
 GATCAAGGCGAGTTACATGATCCCCATGTTGTGCAAAAAAGCGTTAGCTCCTTCGGTCCCGATCGTTGTGAGAAGTAAGTT  
 GGCCGAGTGTATCACTCATGGTTATGGCAGCACTGCATAATTCTTACTGTGCATGCCATCCGTAAGATGCTTTTCTGTGACTG  
 GTGAGTACTCAACCAAGTCATTCTGAGAATAGTGTATGCGGCGACCGAGTTGCTCTTGGCCGCGTCAATACGGGATAATACCG  
 CGCCACATAGCAGAACCTTTAAAGTGTCTCATATTGAAAACGTTCTTCCGGGGCGAAAACCTCTCAAGGATCTTACCGCTGTTGAG  
 ATCCAGTTCGATGTAACCCACTCGTGCACCCAACTGATCTTACGATCTTTTACTTTACCCAGCGTTTCTGGGTGAGCAAAAAACA  
 GGAAGGCAAAATGCCGCAAAAAAGGAATAAGGGCGACACGGAAATGTTGAATACTCAT

2.2.6 Vector 59: Pyl tRNA<sub>UCUA</sub> PylRS mCherry-P2A-eGFP(150TAGA)

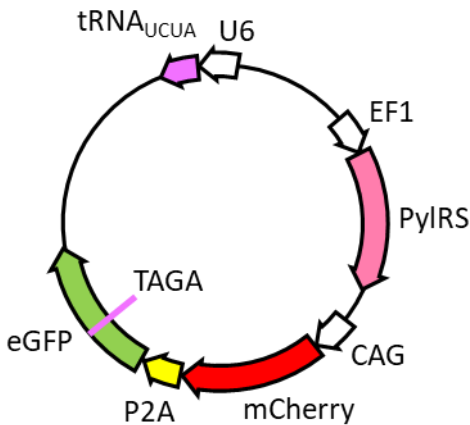

ACTCTTCCTTTTTCAATATTATTGAAGCATTATCAGGGTTATTGTCTCATGAGCGGATACATATTTGAATGTATTTAGAAAAATAA  
 CAAATAGGGGTTCCGCGCACATTTCCCGGAAAAGTGCCACCTAAATTTGTAAGCGTTAATATTTGTTAAAATTCGCGTTAAATTTTT  
 GTTAAATCAGCTCATTTTTTAACCATAAGCCGAAATCGGCAAAATCCCTTATAAAATCAAAAGAATAGACCGAGATAGGGTTGAGT  
 GTTGTCCAGTTTGAACAAGAGTCCACTATTAAGAACGTGGACTCCAACGTCAAAGGGCGAAAAACCGTCTATCAGGGCGAT  
 GGCCCACTACGTGAACCATCACCTAATCAAGTTTTTTGGGGTCGAGGTGCCGTAAGCACTAAATCGGAACCCCTAAAGGGAGC  
 CCCCATTAGAGCTTGACGGGGAAAGCCGGCGAACGTGGCGAGAAAGGAAGGGAAGAAAGCGAAAGGAGCGGGCGCTAGGG  
 CGCTGGCAAGTGTAGCGGTACGCTGCGCGTAACCACCACACCCGCGCGCTTAATGCGCCGCTACAGGGCGCGTCCCATTCC  
 GCCATTAGGTCGCAACTGTTGGGAAGGGCGATCGGTGCGGGCTCTTCGCTATTACGCCAGCTGGCGAAAGGGGGATGT  
 GCTGCAAGGCGATTAAGTTGGGTAACGCCAGGTTTTCCAGTACGACGTTGTAAAACGACGGCCAGTGAGCGCGCTCGTT  
 CATTACGTTTTTGAACCCGTGGAGGACGGGCAGACTCGCGGTGCAATGTGTTTTACAGCGTGATGGAGCAGATGAAGATGCT  
 CGACACGCTGCAGAACACGCAGCTAGATTAACCCTAGAAAGATAATCATATTGTGACGTACGTTAAAGATAATCATGCGTAAAT  
 GACGCATGTGTTTTATCGTCTGTATATCGAGGTTTTATTAATTTGAATAGATATTAAGTTTTATTATTTACACTTACATACTA  
 ATAATAAATTCACAAACAATTTATGTTTATTTATTTAATAAAAAACAAAAACTCAAAATTTCTTCTATAAAGTAACAAAACTT  
 TTATGAGGGACAGCCCCCCCCAAAGCCCCAGGGATGTAATTACGTCCCTCCCCGCTAGGGGGCAGCAGCGAGCCGCCCC  
 GGGCTCCGCTCCGGTCCGGCGCTCCCCCGCATCCCCGAGCCGGCAGCGTGGGGGACAGCCGGGCACGGGGAAGGTGG  
 CACGGGATCGCTTCTCTGAACGCTTCTCGCTGCTTTGAGCCTGCAGACACCTGGGGGATACGGGAAAAGGCCATAAAAA  
 CCGCACTTGTC**CGGAAACCCCGGAAATCTAACCCGGCTGAACGGATTAGAAAGTCCATTGATCTACATGATCAGGTTCCGG**  
 TGTTCC**GTCTTCCACAAGATATAAAGCCAAAGAAATCGAAATCTTCAAGTTACGGTAAGCATATGATAGTCCATTTAAAC**  
**ATAATTTAAAACCTGCAAACTACCCAAGAAATTAATCTTCTACGTCACGTAATTTGTACTAATATCTTTGTGTTTACAGTCAAAAT**  
**AATCTAATTATCTCTTAACAGCCTTGATCGTATATGCAAATATGAAGGAATCATGGGAAATAGGCCCTTCCCTGCCCAACCG**  
 GTTGCATCGCTCCGGTGCCCGTCAAGTGGGCAGAGCGCACATCGCCACAGTCCCGGAGAAGTTGGGGGGAGGGGTCCGGCAA  
 TTGAACGGGTGCCTAGAGAAGGTGGCGCGGGGTAAACTGGGAAAGTGATGTCGTGACTGGCTCCGCTTTTTCCCGAGGGTG  
 GGGGAGAACCCTATATAAGTGCAGTAGTCCCGGTGAACGTTCTTTTTCGCAACGGGTTTGCCGCCAGAACACAGCTGAAGCTT  
 GAGGGCTCGCATCTCTCTTACGCGCCGCCCTCACTGAGCCGCCATCCACGCCGTTGAGTCGCTTCTGCCGCT  
 CCCGCTGTGGTGCCTCCTGAACTGCGTCCGCTTAGGTAAGTTAAAGCTCAGGTCGAGACCCGGCTTTGTCCGGCGCT  
 CCCTTGAGCCTACCTAGACTCAGCCGGCTCTCCAGCTTTGCTGACCCTGCTTGCTCAACTCTACGCTTTGTTTCGTTTTCT  
 GTTCTGCGCGTTACAGATCCAAGCTGTGACCGGCGCTACTCTACAGATAGCGTTAAACTTACGCTTGCACC**ATGGCTAGC**  
**GACTACAAGGACGACGACGACAAGGACAAGAAGCCCTGAACACCCTGATCAGCGCCACAGGACTGTGGATGTCAGAAC**  
**GGCACCATCCACAAGATCAAGCACACGAGGTGTCGGTCCAAATCTACATCGAGATGGCTGCGCGCATCACCTGGTCTG**  
**TCAACAACAGCAGAAGCAGCCGACAGCCAGACGCTCGCGCAACCAAGTACAGAAAGACCTGCAAGCGGTGACAGTGT**  
**CCGACGAGGACCTGAACAAGTTCCTGACCAAGGCCAACGAGGACCAGACGCTGAAAGTGAAGGTGGTGTCCGCCCA**



GTGAAATTGTTATCCGCTCACAATTCCACACAACATACGAGCCGGAAGCATAAAGTGTAAGCCTGGGGTGCCTAATGAGTGAG  
 CTAACTCACATTAATTGCGTTGCGCTCACTGCCCGCTTTCCAGTCGGGAAACCTGTCGTGCCAGCTGCATTAATGAATCGGCCAA  
 CGCGCGGGGAGAGGGCGTTTTCGCTATTGGGCGCTCTTCCGCTTCCCTCGCTCACTGACTCGCTGCGCTCGGTTCGTTCCGGCTGCG  
 GCGAGCGGTATCAGCTCACTCAAAGGCGGTAATACGGTTATCCACAGAATCAGGGGATAACGCAGGAAAGAACATGTGAGCAAA  
 AGGCCAGCAAAAGGCCAGGAACCGTAAAAAGGCCGCGTTGCTGGCGTTTTTCCATAGGCTCCGCCCCCTGACGAGCATACA  
 AAAATCGACGCTCAAGTCAGAGGTGGCGAAACCCGACAGGACTATAAAGATACCAGGCGTTTTCCCCCTGGAAGCTCCCTCGTGC  
 GCTCTCCTGTTCCGACCCTGCCGCTTACCGGATACCTGTCCGCTTTCTCCCTTCGGGAAGCGTGGCGCTTTCTCATAGCTCAC  
 GCTAGTGAACGAAAACCTCACGTTAAGGGATTTTGGTCATGAGATTATCAAAAAGGATCTTACCTAGATCCTTTTAAATTAAAAAT  
 GAAGTTTTAAATCAATCTAAAGTATATATGAGTAAACTTGGTCTGACAGTTACCAATGCTTAATCAGTGAGGCACCTATCTCAGCG  
 ATCTGTCTATTTTCGTTTCATCCATAGTTGCCTGACTCCCGTCTGTGTAGATAACTACGATACGGGAGGGCTTACCATCTGGCCCA  
 GTGCTGCAATGATACCGCGAGACCCACGCTCACCGGCTCCAGATTTATCAGCAATAAACAGCCAGCCGGAAGGGCCGAGCGC  
 AGAAGTGGTCTGCAACTTTATCCGCCCTCCATCCAGTCTATTAATTGTTGCCGGGAAGCTAGAGTAAGTAGTTCGCCAGTTAATA  
 GTTTGCGCAACGTTGTTGCCATTGCTACAGGCTACGTTGTTGTCACGCTCGTCTTTGGTATGGCTTCATTAGCTCCGGTTCCCA  
 ACGATCAAGGCGAGTTACATGATCCCCCATGTTGTGCAAAAAGCGGTTAGCTCCTTCGGTCTCCGATCGTTGTGAGAAGTAAG  
 TTGGCCGAGTGTATCACTCATGTTATGGCAGCACTGCATAATTCTTACTGTCATGCCATCCGTAAGATGCTTTTCTGTGAC  
 TGGTGAAGTACTCAACCAAGTCATTCTGAGAATAGTGTATGCGGGCAGCGAGTTGCTCTTGGCCGCGTCAATACGGGATAATAC  
 CGCGCCACATAGCAGAACCTTTAAAAGTGCTCATCATTGAAAACGTTCTTCGGGGCGAAAACCTCTCAAGGATCTTACCGCTGTTG  
 AGATCCAGTTCGATGTAACCCACTCGTGCACCCAACTGATCTTCAGCATCTTTTACTTTACCAGCGTTTCTGGGTGAGCAAAAA  
 CAGGAAGGCCAAAATGCCGCAAAAAGGGAATAAGGGCGACACGGAAATGTTGAATACTCAT

**2.2.7 Vector 60: Pyl tRNA<sub>UCUA(Ev1)</sub> PyIRS mCherry-P2A-eGFP(150TAGA)**

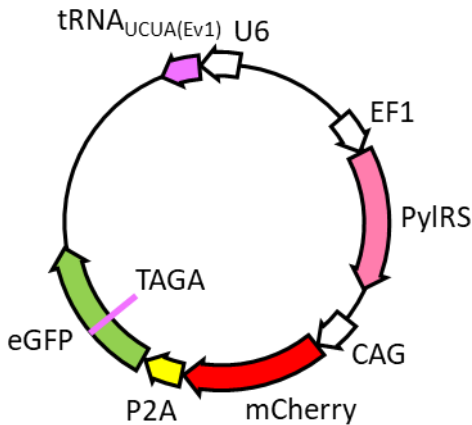

ACTCTTCTTTTCAATATTATTGAAGCATTTATCAGGGTTATTGTCTCATGAGCGGATACATATTTGAATGTATTTAGAAAAATAAA  
 CAAATAGGGGTTCCGCGCACATTTCCCGAAAAGTGCCACCTAAATTGTAAGCGTTAATATTTTGTAAAAATTCGCTTAAATTTTT  
 GTTAAATCAGCTCATTTTTTAACCAATAGGCCGAAATCGGCAAAATCCCTTATAAATCAAAAGAATAGACCGAGATAGGGTTGAGT  
 GTTGTCCAGTTTGAACAAGAGTCCACTATTAAGAACGTGGACTCCAACGTCAAAGGGCGAAAAACCGTCTATCAGGGCGAT  
 GGCCCACTACGTGAACCATCACCTAATCAAGTTTTTTGGGGTCGAGGTGCCGTAAGCACTAAATCGGAACCCCTAAAGGGAGC  
 CCCGATTTAGAGCTTGACGGGGAAAGCCGGCGAACGTGGCGAGAAAGGAAGGAAGAAAGCGAAAGGAGCGGGCGCTAGGG  
 CGCTGGCAAGTGTAGCGGTACGCTGCGCGTAACCAACACACCCGCGCTTAATGCGCCGCTACAGGGCGCGTCCCATTC  
 GCCATTCAGGCTGCGCAACTGTTGGGAAGGGCGATCGGTGCGGGCCTTTCGCTATTACGCCAGCTGGCGAAAGGGGGATGT  
 GCTGCAAGGCGATTAAGTTGGGTAACGCCAGGGTTTTCCAGTACGACGTTGTA AACGACGGCCAGTGAGCGCGCCTCGTT  
 CATTACGTTTTTGAACCCGTGGAGGACGGGACAGCTCGCGGTGCAAAATGTGTTTTACAGCGTGATGGAGCAGATGAAGATGCT  
 CGACACGCTGCAGAACACGCAGCTAGATTAACCCTAGAAAGATAATCATATTGTGACGTACGTTAAAGATAATCATGCGTAAAT  
 GACGCATGTGTTTTATCGGTCTGTATATCGAGGTTTATTTAATTTGAATAGATATTAAGTTTTATTATTTACACTTACATACTA  
 ATAATAAATTCACAAACAATTTATTTATGTTTTATTTAATTTAAAAAACA AAAA ACTCAAAATTTCTTCTATAAAAGTAACAAA  
 ACTTTATGAGGGACAGCCCCCCCCAAAGCCCCAGGGATGTAATTACGTCCCTCCCCGCTAGGGGGCAGCAGCGAGCCGCCCG  
 GGGCTCCGCTCCGGTCCGGCGCTCCCCCGCATCCCCGAGCCGGCAGCGTGCGGGGACAGCCGGGCACGGGGAAGGTGG  
 CACGGGATCGCTTCTCTGTAACGCTTCTCGCTGCTTTGAGCCTGCAGACACCTGGGGGGATACGGGAAAAGGCCATAAAA  
 CCGCACTTGT**CGGAAACCCCGGGAATCTAACCCGGCTGAACCGAGATTAGAGCCATTTCGATCATGATCAGGTTTCG**  
**GTGTTTCGTCCTTTCCACAAGATATAAAGCCAAAGAAATCGAAATACTTTCAAGTTACGGTAAGCATATGATAGTCCATTTAAAA**  
**CATAATTTTAAACTGCAAACCTACCCAAGAAATTATTACTTTCTACGTCACGATTTTTGACTAATATCTTTGTGTTTACAGTCAAAT**  
**TAATTCATAATTCTCTCTAACAGCCTTGATCGTATATGCAAATATGAAGGAATCATGGGAAATAGGCCCTC**TTCTGCCCAACC  
 GGTTGCGATCGCTCCGGTGCCCGTCAGTGGGCAGAGCGCACATCGCCACAGTCCCGGAGAAGTTGGGGGAGGGGTCCGGCA  
 ATTGAACGGGTGCCTAGAGAAGGTGGCGCGGGTAAACTGGGAAAGTGATGTCGTGACTGGCTCCGCTTTTTCCCGAGGGT  
 GGGGGAACCGTATATAAGTGCAGTAGTCGCCGTGAACGTTCTTTTTTCGCAACGGGTTTCCCGCCAGAACACAGCTGAAGCTT  
 CGAGGGGCTCGCATCTCTCTTACGCGCCCGCCGCTACCTGAGGCCGCCATCCACGCCGTTGAGTTCGCTTCTGCGGCT  
 CTCCCGCTGTGGTGCCTCTGAACTGCGTCCGCCGTAGGTAAGTTAAAGCTCAGGTCGAGACCGGGCCTTTGTCCGGCG  
 CTCCTTGGAGCCTACCTAGACTCAGCCGGCTCTCCACGCTTTGCCTGACCCTGCTTGCTCAACTCTACGCTTTTGTTCGTTTT  
 CTGTTCTGCGCCGTTACAGATCCAAGCTGTGACCGGCGCCTACTCTACAGATAGCGTTTAAACTTACGCTTGCACCA**ATGGCTA**  
**GCGACTCAAGGACGACGACGACAAGACAAGAACCCCTGTAAACCCCTGATCAGCGCCACAGGACTGTGGATGCCAGAA**  
**CCGGCACCATCCACAAGATCAAGCACCCAGGTTGCCGGTCCAAAATCTACATCGAGATGGCCTCGCGCATCACCTGGT**  
**CGTCAACAACAGCAGAAGCAGCCGGACAGCCAGAGCCCTGCGGCACCACAAGTACAGAAAGACCTGCAAGCGGTGCAGAG**

TGTCGACGAGGACCTGAACAAGTTCCTGACCAAGGCCAACGAGGACCAGACCAGCGTGAAAGTGAAGGTGGTGTCCGCC  
CCACCCGGACCAAGAAAGCCATGCCAAGAGCGTGGCCAGAGCCCCAAGCCCTGAAAAACCCGAAGCCGCTCAGGCC  
CAGCCCAGCGGCAGCAAGTTCAGCCCCGCATCCCCGTGTCTACCCAGGAAAGCGTCAGCGTCCCCGCCAGCGTGTCCACC  
AGCATCTCTAGCATCTCAACCGGGCCACAGCTTCTGCCCTGGTCAAGGGCAACACCAACCCCATCACCAGCATGTCTGCC  
CTGTGCAAGCCTCTGCCCCAGCCCTGACCAAGTCCCAGACCGACCGGCTGGAAGTGTCTCTGAACCCCAAGGACGAGATCA  
GCCTGAACAGCGGCAAGCCCTTCCGGGAGCTGGAAGCGAGCTGCTGAGCCGGCGGAAGAAGGACCTCCAGCAAATCTACG  
CCGAGGAACGGGAGAATCTCTGGCAAGCTGGAAGAGAGATCACCCGGTCTTCTGTGGACCGGGGCTTCTCTGAAATCA  
AGAGCCCCATCTGATCCCCCTGGAGTACATCGAGCGGATGGGCATCGACAACGACACCCGAGCTGAGCAAGCAGATTTCCG  
GGTGACAAGAACTTCTGCCTGCGGCCATGCTGGCCCCAACCTGTACAACCTGCGGAACTGGATCGCGCTCTGCC  
GACCCCATCAAGATTTTCGAGATCGGCCCTGCTACCGGAAAGAGAGCGACGGCAAAGAGCACCTGGAAGAGTTACAATGC  
TGAATTTTCCAGATGGGCAGCGGCTGCACCGAGGAGAACCTGGAATCCATCATCACCAGCTTTCTGAACCACCTGGGGAT  
CGACTTCAAGATCTGGGCGACGAGCTGCATGGTGACGGCAGACCCCTGGACGTGATGCACGGCGACCTGGAATGTCTAG  
CGCGTCTGTGGACCCATCCCCTCGACCGGAGTGGGCATCGATAAGCCCTGGATCGGAGCGGCTTCGCGCTGGAACG  
GCTGCTGAAAGTCAAGCACGACTTTAAGAACATCAAGCGGGGCTGCCAGAAGCGAGAGCTACTACAACGGCATCAGCACAA  
CCTGTGATGATAAGGATCCACTAGTCCAGTGTGGTGAATTGACATTGATTATTGACTAGTTATTAATAGTAATCAATTACGGGGT  
CATTAGTTCATAGCCCATATATGGAGTTCGCGTACATAACTTACGGTAAATGCCCCGCTGGCTGACCGCCCAACGACCCCC  
GCCAATTGACGTCAATAATGACGTATGTTCCCATAGTAACGCCAATAGGGACTTTCCATTGACGTCAATGGGTGGAGTATTTACG  
GTAACCTGCCACTTGGCAGTACATCAAGTGTATCATATGCCAAGTACGCCCTTATTGACGTAATGACGGTAAATGCCCCGCC  
TGGCATTATGCCAGTACATGACCTTATGGACTTTCTACTTGGCAGTACATCTACGTATTAGTCATCGCTATTACCATGGTCCGA  
GGTGAGCCCCACGTTCTGCTTACTCTCCCCATCTCCCCCCCCCTCCCCACCCCAATTTTGTATTTATTTATTTTAAATTTTTG  
TGCAGCGATGGGGGCGGGGGGGGGGGGGGGCGCGCCAGGCGGGGCGGGGCGGGGCGAGGGGCGGGGCGGGGCGAGGC  
GGAGAGGTGCGCGGCGAGCCAATCAGAGCGGGCGCTCCGAAAGTTTCTTTTATGGCGAGGCGGGCGGGCGGGCGGGCCCT  
ATAAAAAGCAAGCGCGCGGGGGGGGGGAGTCTGCTGCTTCCCTCCCGCTGCCCGCTCCCGCTCCGCGCCGCTCCGCGCC  
CGCCCCGCTCTGACTGACCGCTTACTCCCACAGTGTAGCGGGCGGACGGCCCTTCTCTCCGGCTTAATTAGCGTTG  
GTTTAAATGACGGCTCGTTTCTTTCTGTGGCTGCGTGAAGCCTTAAAGGGCTCCGGGAGGGCCCTTTGTGCGGGGGGAGCG  
GCTCGGGGGGTGCGTGCCTGTGTGTGCTGGGAGCGCCGCTGCGGCCCGCGCTGCCGCGCGGCTGTGAGCGCTGCG  
GGCGCGCGCGGGGCTTTGTGCGCTCCGCGTGTGCGCGAGGGGAGCGCGGCCGGGGCGGTGCCCGCGGTGCGGGGG  
GCTGCGAGGGGAACAAAGGCTGCTGCGGGGTGTGTGCGTGGGGGGTGTGAGCAGGGGGTGTGGCGCGGGGCTGGGGT  
TAACCCCCCTGCACCCCTCCCCGAGTTGCTGAGCACGGCCCGCTTCCGGTGCGGGGCTCCGTACGGGGCGTGGCGC  
GGGGCTCGCCGTGCCGGGCGGGGGTGGCGGCAGGTGGGGTCCGGGGCGGGGCGGGGCCGCTCGGGCCGGGAGGG  
CTCGGGGAGGGGCGGGCGGCCCCCGAGCGCGGGCGGCTGTCGAGGCGGGCGAGCCGACCCATTGCCTTTTATGGTA  
ATCGTGCGAGAGGGCGCAGGGACTTCCTTTGTCCAAATCTGTGCGGAGCCGAAATCTGGGAGCGCCGCGCACCCCTCTA  
CGGGTCCGGGGGCAAGCGGCTGCGCGCCGCGCAGGAAGAAATGGGCGGGGAGGGCCCTCTGCTGCTCGCCGCGCCCT  
CCCCCTTCCCTCCAGCCTCGGGCTGCCCCGGGGAGGACGGCTGCCCTTCCGGGGGACGGGGCAGGGCGGGTTCGGC  
TTCTGGCGTGTGACCGCGGCTCTAGAGCCTGTCTAACCATTGTTTCATGCCTTCTTTTCTTCTTCTTCTTCTTCTTCT  
TGTTATTGTGCTGTCTCATCATTTTTGGCAAAGAATTCGCCACCATGGTGAGCAAGGGCGAGGAGGATAACATGGCCATCATCA  
AGGAGTTCATGCGCTTCAAGGTGCACATGGAGGGCTCCGTGAACGGCCACGAGTTCGAGATCGAGGGCGAGGGCGAGGGCC  
GCCCTACGAGTGCACCCAGCCGCAAGCTGAAGGTGACCCAGGGTGGCCCCCTGCCCTTCGCTGGACATCCTGTCCC  
CTCAGTTCTAGGCTCAAGGCTACGTGAAGCACCCCGGACATCCCCGACTACTTGAAGCTGTCTTCCCCGAGGG  
CTTCAAGTGGGAGCGCTGAACCTTCGAGGACGGCGGCTGGTACCCTGACCCAGGACTCCTCCTCGAGGACGGCGA  
GTTTCATCTACAAGGTGAAGCTGCGCGCACCAACTTCCCTCCGACGGCCCCGTAATGCAGAAGAAGACCATGGGCTGGGA  
GGCCTCCTCGAGCGGATGTACCCCGAGGACGGCGCCTGAAGGGCGAGATCAAGCAGAGGCTGAAGCTGAAGGACGGCG  
GCCACTACGACGCTGAGTCAAGACCACCTACAAGGCCAAGAAGCCCGTGCAGCTGCCCGGCGCCTACAACGTCAACATCA  
AGTTGGACATCACCTCCACAACGAGGACTACACCATCGTGAACAGTACGAACGGCGCCGAGGGCCGCACTCCACCGCG  
GATGGACGAGCTGACGCTGGAGGCGCCCAATTTACGCTGTGAAACAGGCTGGCGACGTTGGAAGAGAACCCTG  
GACCTGGACAAAAGTCCGTTGAGCAAGGGCGAGGAGCTGTTACCAGGGGTGGTGCCATCCTGGTTCGAGCTGGACGGCGACG  
TAAACGGCCACAAGTTCAGCGTGTCCGGCGAGGGCGAGGGCGATGCCACCTACGGCAAGCTGACCCTGAAGTTCATCTGCA  
CCACCGCAAGCTGCCCGTGCCTGGCCACCCTCGTACCACCTGACCTACGGCGTGCAGTGTTCAGCCGCTACCCCGA  
CCACATGAAGCAGCAGCATCTTCAAGTCCGCCATGCCGAAGGCTACGTCAGGAGCGCACCATCTTCTTCAAGGACGAC  
GGCAACTACAAGACCGCGAGGTGAAGTTCGAGGGCGACACCTGGTGAACCGCATCGAGCTGAAGGGCATCGACATTC  
AAGGAGGACGGCAACATCTGGGGCACAAGCTGGAGTACAACATAACAGCCACTAGAGTCTATATCATGGCCGACAAGCA  
GAAGAACGGCATCAAGGTGAACCTCAAGATCCGCCACAACATCGAGGACGGCAGCGTGCAGCTCGCCGACCACTACCAGCA  
GAACACCCCATCGGCGACGGCCCCGTGCTGCTGCCCGACAACCACTACCTGAGCACCCAGTCCGCCCTGAGCAAAGACCC  
CAACGAGAAGCGGATCACATGGTCTGCTGGAGTTCGTGACCGCCGCGGGGATCACTCTCGGCATGGACGAGCTGTACAA  
GTAAGAATTAACCTCAGGTGCAGGCTGCCTATCAGAAGTGGTGGCTGGTGTGGCCAATGCCCTGGCTCACAATACCACTG  
AGATCTTTTTCCCTCTGCCAAAATTATGGGACATCATGAAGCCCTTGAAGTCTGACTTCTGGCTAATAAAGGAAATTTATTT  
TCATTGCAATAGTGTGTTGGAATTTTTGTGTCTCTCACTCGGAAGGACATATGGGAGGGGTCGACAATCAACCTCTGGATTACA  
AAATTTGTGAAAGATTGACTGGTATTCTTAACTATGTTGCTCCTTTACGCTATGTGGATACGCTGCTTAAATGCCTTTGTATCATG  
CGTTAACTAACTTGTATTGACGCTTATAATGTTTACAATAAAGCAATAGCATCACAATTTTCAAAATAAAGCATTTTTTTAC  
TGCATTTAGTTGGTTTTGTCCAACTCATCAATGTATCTTATCATGTCTGGAATTGACTCAAATGATGTCAATTAGTCTATCAGA  
AGCTATCTGGTCCCTTCCGGGGGACAAGACATCCCTGTTTAAATTTAAACAGCAGTGTTCCAAACCTGGGTTCTTATATCCCT  
TGCTCTGGTCAACCAGTTGACGGTTTTCTGTCTCACAGGAACGAAGTCCCTAAAGAAACAGTGGCAGCCAGGTTTAGCCCC  
GGAATTGACTGGATTCTTTTTAGGGCCATTGGTATGGCTTTTTCCCGTATCCCCCAGGTGTCTGCAGGCTCAAAGAGCAG  
CGAGAAGCGTTTCAAGAGAAAGCGATCCCGTGCACCTTCCCGTGCCTGGGCTGTCCCGCACGCTGCCGGCTCGGGGATGC  
GGGGGGAGCGCCGACCGGAGCGGAGCCCGGGCGGCTCGCTGCCCTAGCGGGGGAGGGACGTAATTACATCCCTG  
GGGGCTTTGGGGGGGGGCTGCCCTGATATCTATAACAAGAAAATATATAATAAGTTATCACGTAAGTAGAACATGAAATAA  
CAATAAATTCGATGATGATTAAGTAAAGTCAAGTCAAGTAAAGATAATCAATCGCTTATTTGACTCACGCGCTTATAGTTCA  
AATCAGTGACACTTACCGCATTGACAAGCACGCTCACGGGAGCTCCAAGCGGCGACTGAGATGCTCTAAATGCACAGCGACG  
GATTCGCGCTATTTAGAAAGAGAGAGCAATATTTCAAGAATGCATGCGTCAATTTTACGCAACTATCTTTTAGGGTTAATCTAG  
CTGCATCAGGATCATATCGTCGGGTCTTTTTCCGGCTCAGTCATCGCCAAAGCTGGCGCTATCTGGGCATCGGGGAGGAAGAA  
GCCCGTGCCTTTCCCGGAGGTTGAAGCGGATGGAAGAGTTTCCCGAGGATGACTGCTGCTGCATTGACGTTGAGCGAAA  
ACGCACGTTTACCATGATGATTCGGGAAGGTGGCCATGCACGCTTTAACCGGTGAAGTTCGTTACGCGCCACGCGCCATGGATAC  
CAGTTCGTCGCGGCTTTTCCGGACACAGTTCGGATGGTACGCCGAAGCGCATCAGCAACCCGAACAATACCGGCGACAGCC  
GGAATGCCGTGCCGGTGTGCAGATTAATGACAGCGGTGCGGCGCTGGGATATTACGTCAGCGAGGACGGGTATCCTGGCTG

GATGCCGCAGAAATGGACATGGATACCCCGTGAGTTACCCGGCGGGCGCGCTTGGCGTAATCATGGTCATAGCTGTTTCTGT  
 GTGAAATTGTTATCCGCTCACAATCCACACAACATACGAGCCGGAAGCATAAAGTGTAAGCCTGGGGTGCTAATGAGTGAG  
 CTAACCTACATTAATTGCGTTGCGCTCACTGCCCGCTTTCCAGTCGGGAAACCTGTCGTGCCAGCTGCATTAATGAATCGGCCAA  
 CGCGCGGGGAGAGGCGGTTTGCATTTGGGCGCTCTCCGCTTCCCTCGCTCACTGACTCGCTGCGCTCGGTCTCGGCTGCG  
 GCGAGCGGTATCAGCTCACTCAAAGGCGGTAATACGGTTATCCACAGAATCAGGGGATAACGCAGGAAAGAACATGTGAGCAA  
 AGGCCAGCAAAGGCCAGGAACCGTAAAAAGGCCGCGTGTGCTGGCGTTTTTCCATAGGCTCCGCCCCCTGACGAGCATCACA  
 AAAATCGACGCTCAAGTCAGAGTGCGGAAACCCGACAGGACTATAAGATACCAGGCGTTTTCCCTGGAAGCTCCCTCGTGC  
 GCTCTCCTGTTCCGACCCTGCCGCTTACCGGATACCTGTCCGCTTTCTCCCTTCGGGAAGCGTGGCGCTTTCTCATAGCTCAC  
 GCTGTAGGTATCTCAGTTCGGTGTAGTTCGCTCCAAGCTGGGCTGTGTGCACGAACCCCGTTCAGCCCGACCGCTGC  
 GCCTTATCCGTAACATATCGTCTTGTAGTCCAACCCGTAAGACAGACTTATCGCCACTGGCAGCAGCCACTGGTAAACAGGATT  
 AGCAGAGCGAGGTATGTAGGCGGTGCTACAGAGTCTTGAAGTGGTGGCTAACTACGGCTACACTAGAAGGACAGTATTTGGT  
 ATCTGCGCTCTGCTGAAGCCAGTTACCTTCGGAAAAAGAGTTGGTAGCTCTTGTATCCGGCAAACAAACCACCGCTGGTAGCGGT  
 GGTTTTTTTGTTCGCAAGCAGCAGATTACGCGCAGAAAAAAGGATCTCAAGAAGATCCTTTGATCTTTTACGGGGTCTGACG  
 CTCAGTGAACGAAAACCTCACGTTAAGGGATTTTGGTCATGAGATTATCAAAAAGGATCTTCACCTAGATCCTTTTAAATTAATAA  
 GAAGTTTTAAATCAATCTAAAGTATATATGAGTAAACTTGGTCTGACAGTTACCAATGCTTAATCAGTGAGGCACCTATCTCAGCG  
 ATCTGTCTATTTTCGTTTCATCCATAGTTGCCTGACTCCCCGTCGTGTAGATAACTACGATACGGGAGGGCTTACCATCTGGCCCCA  
 GTGCTGCAATGATACCGCGAGACCCACGCTCACCGGCTCCAGATTTATCAGCAATAAACAGCCAGCCGGAAGGGCCGAGCGC  
 AGAAGTGGTCTGCAACTTTATCCGCTCCATCCAGTCTATTAATTGTTGCCGGAAGCTAGAGTAAGTAGTTCGCCAGTTAATA  
 GTTTGCGCAACGTTGTTGCCATTGCTACAGGCATCGTGGTGTACGCTCGTCTTGGTATGGCTTCATTCAGCTCCGTTCCCA  
 ACGATCAAGGCGAGTTACATGATCCCCCATGTTGTGCAAAAAAGCGTTAGCTCCTTCGGTCTCCGATCGTTGTGCAAGTAAG  
 TTGGCCGAGTGTATCACTCATGTTATGGCAGCACTGCATAATTCTTACTGTATGCCATCCGTAAGATGCTTTTCTGTGAC  
 TGGTGTAGTACTCAACCAAGTCATTCTGAGAATAGTGTATGCGGCGACCGAGTTGCTCTTGGCCGCGTCAATACGGGATAATAC  
 CGCGCCACATAGCAGAACCTTTAAAGTGTCTATCATTGGAACGTTCTTCCGGGGCAAACCTCTCAAGGATCTTACCGCTGTTG  
 AGATCCAGTTCGATGAACCCACTCGTGCAACCAACTGATCTTCAGCATCTTTTACTTTTACCAGCGTTTCTGGGTGAGCAAAAA  
 CAGGAAGGCAAAATGCCGCAAAAAAGGGAATAAGGGCGACACGGAAATGTTGAATACTCAT

**2.2.8 Vector 61: Pyl tRNA<sub>UCUA(Ev2)</sub> PylRS mCherry-P2A-eGFP(150TAGA)**

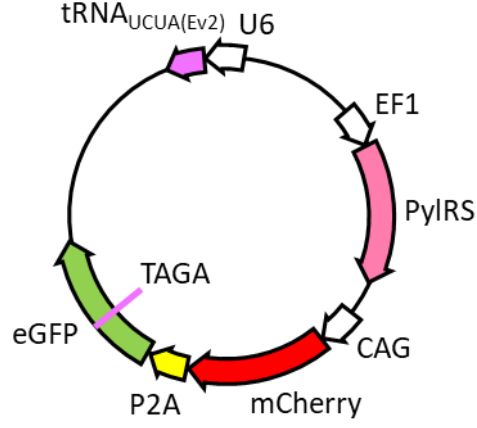

ACTCTTCTTTTCAATATTATTGAAGCATTATCAGGGTTATTGTCTCATGAGCGGATACATATTTGAATGTATTGAAAAATAA  
 CAAATAGGGGTTCCGCGCACATTTCCCCGAAAAGTGCCACCTAAATTGTAAGCGTTAATATTTTGTAAAAATTCGCTTAAATTTTT  
 GTTAAATCAGCTCATTTTTTAACCAATAGGCCGAAATCGGCAAAATCCCTTATAAATCAAAGAATAGACCGAGATAGGGTTGAGT  
 GTTGTCCAGTTTGAACAAGAGTCCACTATTAAGAACGTGGACTCCAACGTCAAAGGGCGAAAAACCGTCTATCAGGGCGAT  
 GGCCCACTAGTGAACCATCACCTAATCAAGTTTTTGGGGTCGAGGTGCCGTAAGCACTAAATCGGAACCCCTAAAGGGGAGC  
 CCCCATTAGCTTGACGGGAAAGCCGGCAACCTGGCGAGAAAGGAAGGAAAGGAAAGGAGCGGGCGCTAGGG  
 CGCTGGCAAGTGTAGCGGTGACGCTGCGCTGACCCAGTACCCAGCCGCGCTTAATGCGCCGCTACAGGGCGCGTCCCATT  
 GCCATTAGGCTGCGCAACTGTTGGGAAGGGCGATCGGTGCGGGCCTCTTCGCTATTACGCCAGCTGGCGAAAGGGGGATGT  
 GCTGCAAGGCGATTAAGTTGGGTAACGCCAGGGTTTTCCAGTACGACGTTGTAACGACGGCCAGTGAGCGCGCCTCGTT  
 CATTACGTTTTTGAACCCGTGGAGGACGGGACGACTCGCGGTGCAAAATGTGTTTTACAGCGTGATGGAGCAGATGAAGATGCT  
 CGACACGCTGCAGAACCGCAGCTAGATTAACCCTAGAAAGATAATCATATTGTGACGTACGTTAAAGATAATCATGCGTAAAAT  
 GACGCATGTGTTTTATCGTCTGTATATCGAGTTTTATTAATTTGAATAGATATTAAGTTTTATTATTTTACACTTACATACTA  
 ATAATAAATTCAACAAACAATTTATTTATGTTTATTTATTTATTAATAAAAAAACAACAACTCAAAATTTCTTCTATAAAGTAAACAACTT  
 TTATGAGGGACAGCCCCCCCCAAAGCCCCAGGGATGTAATTACGTCCCTCCCCGCTAGGGGGCAGCAGCGAGCCGCCCG  
 GGGCTCCGCTCCGGTCCGCGCTCCCCCGCATCCCCGAGCCGCGAGCGTGCGGGGACAGCCCGGGCACGGGGAAGGTGG  
 CACGGGATCGTTTTCTCTGACGCTTCTCGTCTTTGAGCCTGCAGACACCTGGGGGGATACGGGGAAGGGCTAAAAA  
 CCGCACTTGTCTCGGAACCCCGGAATCTAACCCGGCTGAAGCGGATTAGAGCCCATTCGATCTACATGATCAGGTTCCG  
 GTGTTTCGTCTTTCCACAAGATATATAAAGCCAAGAAATCGAAATACTTTCAAGTTACGGTAAGCATATGATAGTCCATTTTAA  
 CATAATTTTAAACTGCAAACCTACCAAGAAATTTACTTTCTACGTCACGATTTTTGTACTAATATCTTTGTGTTTACAGTCAA  
 TAATTTCTAATTATCTCTCTAACAGCCTTGATCGTATATGCAAAATATGAAGGAATCATGGGAAATAGGCCCTCTTCTGCCAACC  
 GGTTGCGATCGCTCCGGTGCCCGTCAGTGGGCAGAGCGCACATCGCCACAGTCCCGGAGAAGTTGGGGGGAGGGGTCCGCA  
 ATTGAACGGGTGCTTAGAGAAGGTGGCGGGGTAACCTGGGAAAGTGTGCTGTACTGGCTCCGCTTTTCCCGAGGGT  
 GGGGGAGAACCCTATATAAGTGCAGTAGTCCGCGTGAACGTTCTTTTTTCGCAACGGGTTTGGCGCCAGAACACAGCTGAAGCTT  
 CGAGGGGCTCGCATCTCTCTTACGCGCCCGCCGCCCTACCTGAGGCCGCCATCCACGCCGTTGAGTCGCGTTCTGCCGC  
 CTCCCGCTGTGGTGCCTCCTGAACTGCGTCCGCGTCTAGGTAAGTTAAAGCTCAGGTCGAGACCGGGCTTTGTCCGGCG  
 CTCCCTGGAGCCTACCTAGACTCAGCCGGCTCCACGCTTTGCTGACCCCTGCTTGTCTCAACTCTACGCTTTTGTTCGTTTT  
 CTGTTCTGCGCCTACAGATCCAAGCTGTGACCGGCTACTCTACAGATAGCGTTTAAACTTACGCTTCCACCATTGGTCA  
 GCGACTCAAGGACGACGACAAGGACAAGAAGCCCTGAACACCTGATCAGCGCCACAGGACTGTGGATGTCCAGAA  
 CCGGCACCATCCACAAGATCAAGCACACGAGGTGTCCGGTCCAAAATCTACATCGAGATGGCTGCGGCGATCACCTGTT



GGAAGTCCGTCGCCGGTGTGCAGATTAATGACAGCGGTGCGGCGCTGGGATATTACGTCAGCGAGGACGGGTATCCTGGCTG  
 GATGCCGCAGAAATGGACATGGATACCCCGTGAGTTACCCGGCGGGCGCGCTTGGCGTAATCATGGTCATAGCTGTTTCCTGT  
 GTGAAATTGTTATCCGCTCACAAATCCACACAACATACGAGCCGGAAGCATAAAGTGTAAGCCTGGGGTGCTAATGAGTGAG  
 CTAATCACAATTAATTGCGTTGCGCTCACTGCCCGCTTCCAGTCGGGAAACCTGTGCTGCCAGCTGCATTAATGAATCGGCCAA  
 CGCGCGGGGAGAGGGCGTTTTCGCTATTGGGCGCTCTTCCGCTTCCCTCGCTCACTGACTCGCTGCGCTCGGTCGTTCCGGCTGCG  
 GCGAGCGGTATCAGCTCACTCAAAGGCGGTAATACGGTTATCCACAGAATCAGGGGATAACGCAGGAAAGAACATGTGAGCAAA  
 AGGCCAGCAAAAGGCCAGGAACCGTAAAAAGGCCGCGTTGCTGGCGTTTTTCCATAGGCTCCGCCCCCTGACGAGCATCACA  
 AAAATCGACGCTCAAGTCAGAGGTGGCGAAAACCCGACAGGACTATAAAGATACCAGGCGTTTTCCCCCTGGAAGCTCCCTCGTGC  
 GCTCTCCTGTTCCGACCCTGCCGCTTACCGGATACCTGTCCGCTTTCTCCCTTCGGGAAGCGTGGCGCTTTCTCATAGCTCAC  
 GCTGTAGGTATCTCAGTTCGGTGTAGGTCGTTCCGCTCCAAGCTGGGCTGTGTGCACGAACCCCGTTCCAGCCCACCGCTGC  
 GCCTTATCCGGTAACTATCGTCTTGAGTCCAACCCGGTAAGACACGACTTATCGCCACTGGCAGCAGCCACTGGTAACAGGATT  
 AGCAGAGCGAGGTATGTAGGCGGTGTACAGAGTTCTTGAAGTGGTGGCTAACTACGGCTACACTAGAAGGACAGTATTTGGT  
 ATCTGCGCTGTCTGAAGCCAGTTACCTTCGGAAGAGTTGGTAGCTTTGATCCGGCAAAACAAACCACCGCTGGTAGCGGT  
 GGTTTTTTTGTGCAAGCAGCAGATTACGCGCAGAAAAAAGGATCTCAAGAAGATCCTTTGATCTTTTCTACGGGGTCTGACG  
 CTCAGTGGAAACGAAAACCTCACGTTAAGGGATTTTGGTCATGAGATTATCAAAAAGGATCTTCACCTAGATCCTTTTAAATTAATAA  
 GAAGTTTTAAATCAATCTAAAGTATATGAGTAAACTTGGTCTGACAGTTACCAATGCTTAATCAGTGAGGCACCTATCTCAGCG  
 ATCTGTCTATTTTCGTTTATCCATAGTTGCCTGACTCCCGCTCGTGTAGATAACTACGATACGGGAGGGCTTACCATCTGGCCCCA  
 GTGTGCAATGATACCGCGAGACCCACGCTCACCAGGCTCCAGATTTATCAGCAATAAACCAGCCAGCCGGAAGGGCCGAGCGC  
 AGAAGTGGTCTGCAACTTTATCCGCTCCATCCAGTCTATTAATTGTTGCCGGAAGCTAGAGTAAGTAGTTCGCCAGTTAATA  
 GTTTGCCAACGTTGTTGCCATTGCTACAGGCATCGTGGTGTACGCTCGTCTTTGGTATGGCTTCATTACAGCTCCGGTTCCCA  
 ACGATCAAGGCGAGTTACATGATCCCCATGTTGTGCAAAAAGCGGTTAGCTCCTTCGGTCTCCGATCGTTGTGAGAAGTAAG  
 TTGGCCGCAAGTGTATCACTCATGTTATGGCAGCACTGCATAATTCTTACTGTATGCCATCCGTAAGATGCTTTTCTGTGAC  
 TGGTGTACTCAACCAAGTCACTTCTGAGAATAGTGTATGCGGCGACCGAGTTGCTCTTGGCCGCGTCAATACGGGATAATAC  
 CGCGCCACATAGCAGAACTTTAAAAGTGCTCATCATTGAAAAACGTTCTTCGGGGCGAAAACCTCAAGGATCTTACCCTGTTG  
 AGATCCAGTTCGATGTAACCCACTCGTGCACCCAACTGATCTTCAGCATCTTTTACTTTACCAGCGTTTCTGGGTGAGCAAAAA  
 CAGGAAGGCAAAATGCCGCAAAAAGGAATAAGGGCGACACGAAATGTTGAATACTCAT

2.2.9 Vector 62: Pyl tRNA<sub>CUAG</sub> PylRS mCherry-P2A-eGFP(150CTAG)

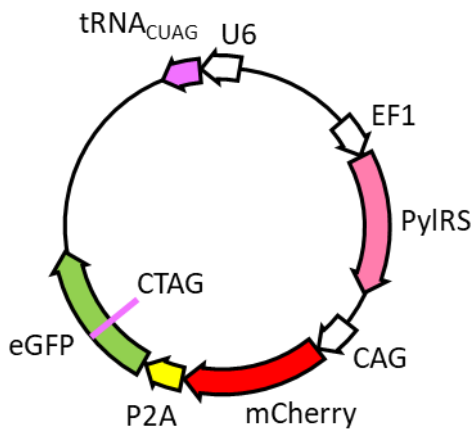

ACTCTTCTTTTTCAATATTATTGAAGCATTATCAGGGTTATTGTCTCATGAGCGGATACATATTTGAATGTATTTAGAAAAATAA  
 CAAATAGGGGTTCCGCGCACATTTCCCGGAAAAGTGCCACCTAAATGTAAGCGTAAATATTTGTTAAAATTCGCGTAAATTTTT  
 GTTAAATCAGCTCATTTTTTAAACCAATAGCCGAAAATCGGCAAAATCCCTTATAAATCAAAAGAATAGACCGAGATAGGGTTGAGT  
 GTTGTTCCAGTTTGAACAAGAGTCCACTATTAAGAACGTTGGACTCCAACGTCAAAGGGCGAAAAACCGTCTATCAGGGCGAT  
 GGCCACTACGTGAACCATACCCTAATCAAGTTTTTTGGGGTCGAGGTGCCGTAAGCACTAAATCGGAACCCATAAAGGGAGC  
 CCCCAGTTTAGAGCTTACGGGGAAAGCCGGCGAACGTGCGCAGAAAAGGAAGGGAAGAAAGCGAAAAGGAGCGGGCGCTAGGG  
 CGCTGGCAAGTGTAGCGGTACGCTGCGGTAACCACCACACCCGCCGCGCTTAATGCGCCGCTACAGGGCGCGTCCCATTC  
 GCCATTCAGGCTGCGCAACTGTTGGGAAGGGCGATCGGTGCGGGCCTCTTCGCTATTACGCCAGCTGGCGAAAGGGGGATGT  
 GCTGCAAGGCGATTAAGTTGGGTAACGCCAGGGTTTTCCAGTCACGACGTTGTA AACGACGGCCAGTGAGCGCGCCTCGTT  
 CATTACGTTTTTGAACCCGTGGAGGACGGGCAGACTCGCGGTGCAAAATGTGTTTTACAGCGTGATGGAGCAGATGAAGATGCT  
 CGACACGCTGCAGAACACGCGAGCTAGATTAACCCTAGAAAAGATAATCATATTGTGACGTACGTTAAAGATAATCATGCGTAAAAT  
 GACGCATGTGTTTTATCGGTCTGTATATCGAGGTTATTTAATTTGAATAGATATTAAGTTTTATTATTTACACTTACATACTA  
 ATAATAAATTCAACAAACAATTTATTTATGTTATTTATTTATTA AAAAAAACAAAACTCAAAATTTCTTCTATAAAGTAACAAAATT  
 TTATGAGGGACAGCCCCCCCCAAAGCCCCAGGGATGTAATTACGTCCCTCCCCGCTAGGGGGCAGCAGCGAGCCGCCCG  
 GGGCTCCGCTCCGGTCCGGCTCCCGCCTCCCGCATCCCGAGCCCGCAGCGTGCGGGGACAGCCGGGCACGGGAAGGTGG  
 CACGGGATCGTTTTCTCTGAACGCTTCTCGTGTCTTTGAGCCTGCAGACACCTGGGGGATACGGGGAAAAGGCCATAAAAA  
 CCGCACTTGTCCGAAACCCCGGAAATCTAACCCGGCTGAACGGATTCTAGAGTCCATTTCGATCTACATGATCAGGTTTCCGG  
 TGTTTCGTCCTTTCCACAAGATATATAAAGCCAAGAAATCGAAATACTTTCAAGTTACGGTAAGCATATGATAGTCCATTTTAAAC  
 ATAATTTTAAAAGTCAAACCTACCCAAGAAATTAATCTTTCTACGTCACGATTTTTGACTAATATCTTTGTGTTTACAGTCAAAT  
 AATTCTAATTAATCTCTTAACAGCCTTGATCGTATGCAATATGAAGAAATCATGGGAAATAGGCCCTTTCCTGCCCAACCCG  
 GTTGCATCGTCCGGTCCCGTCAAGTGGGCAGAGCCACATCGCCACAGTCCCGGAGAAGTTGGGGGAGGGTCCGGCAA  
 TTGAACGGGTGCCTAGAGAAGGTGGCGCGGGTAAACTGGGAAAGTGATGTCGTGACTGGCTCCGCCTTTTCCCGAGGGTG  
 GGGGAGAACCCTATATAAGTGCAGTAGTCGCCGTGAACGTTCTTTTTGCAACGGGTTTGGCCCGAAGACACAGCTGAAGCTTC  
 GAGGGGCTCGCATCTCTCTTACGCGCCCGCCGCCCTACCTGAGGCCGCCATCCACGCCGTTGAGTGCAGTCTTCCGCGCT  
 CCCGCTGTGGTCCCTCTGAACCTGCGTCCGCGCTAGGTAAGCTTAAAGCTCAGGTCGAGACCCGGCCCTTTGTCCGGCGCT  
 CCTTGGAGGCTACCTAGACTCAGCGGCTCTCCAGCTTTGAGCTGACCCTGCTTGTCAACTACGCTTTTGTCTGTTTTCT  
 GTTCTGCGCGTTACAGATCCAAGCTGTGACCGCGCCTACTCTACAGATACGTTTTAAACTTACGCTTCCACCATTGGCTAGC  
 GACTACAAGGACGACGACGACAAGGACAAGAAGCCCTGAACACCCTGATCAGCGCCACAGGACTGTGGATGTCCAGAACC



GGCACCATCCACAAGATCAAGCACACGAGGTGCCGGTCCAAAATCTACATCGAGATGGCCTGCGGCGATCACCTGGTCG  
TCAACAACAGCAGAAGCAGCCGACAGCCAGAGCCCTGCGGCACCACAAGTACAGAAAACCTGCAAGCGGTGCAGAGTGT  
CCGACGAGGACCTGAACAAGTTCCTGACCAAGGCCAACGAGGACCAGACCAGCGTGAAAGTGAAGTGGTGTCCGCCCCCA  
CCCGGACCAAGAAAAGCCATGCCAAGAGCGTGGCCAGAGCCCCAAGCCCCTGGAAAACACCGAAGCCGCTCAGGCCAG  
CCCAGCGGCAGCAAGTTCAGCCCCGCCATCCCCGTGTCTACCCAGGAAAAGCGTACGCGTCCCCGCCAGCGTGTCCACCAGC  
ATCTCTAGCATCTCAACCGGCGCCACAGCTTCTGCCCTGGTCAAGGGCAACACCAACCCCATCACCAGCATGTCTGCCCTGT  
GCAAGCCTCTGCCCCAGCCCTGACCAAGTCCCAGACCGACCCGCTGGAAGTGTCTCTGAACCCCAAGCAGCATCAGCCT  
GAACAGCGGCAAGCCCTTCGGGAGCTGGAAGAGAGTCTGCTGAGCCGGCGGAAGAAGGACCTCCAGCAAATCTACGCCG  
AGGAACGGGAGAAGTACCTGGGCAAGCTGGAAGAGAGATCACCCGTTCTTCTGGACCAGGGGCTTCTGGAAATCAAGA  
GCCCCATCCTGATCCCCCTGGAGTACATCGAGCGGATGGGCATCGACAACGACACCGAGCTGAGCAAGCAGATTTTCCGGGT  
GGACAAGAAGTCTGCTGCGGCCATGCTGGCCCCAACCTGTACAACCTACCTGCGGAAACTGGATCGCGCTCTGCCCGAC  
CCCATAAGATTTTCGAGATCGGCCCTGCTACCGGAAAAGAGCGACGGCAAGAGCACCTGGAAAGTTCACAAATGCTGA  
ACTTTTCCAGATGGGACGCGCTGACCCAGAGAACTGGAATCATCATCACCAGCTTTTGAACCAAGTTCGGATCGA  
CTTCAAGATCGTGGGCGACAGCTGCATGGTGTACGGCGACACCCTGGACGTGATGCACGGCGACCTGGAAGTGTCTAGCGC  
CGTGTGGGACCCATCCCTCTGGACCGGGAGTGGGGCATCGATAAGCCCTGGATCGGAGCCGGCTTCCGCTGGAACGGCT  
GCTGAAAGTCAAGCAGGACTTTAAGAATCAAGCGGGTGCAGAAAGCGAGAGCTACTACAACGGCATCAGCACCAACT  
GTGATGATAAGGATCCACTAGTCCAGTGTGGTGAATTGACATTGATTATTGACTAGTTATTAATAGTAATCAATTACGGGGT  
TAGTTCATAGCCATATATGGAGTTCGCGTTACATAACTACGGTAAATGGCCCGCTGGCTGACCGCCCAACGACCCCGCC  
CATTGACGTCAATAATGACGTATGTTCCCATAGTAACGCCAATAGGGACTTTCCATTGACGTCAATGGGTGGAGTATTTACG  
AACTGCCCACTTGGCAGTACATCAAGTGTATCATATGCCAAGTACGCCCCCTATTGACGTCAATGACGGTAAATGGCCCGCCTG  
GCATTATGCCAGTACATGACCTTATGGGACTTTCTACTTGGCAGTACATCTACGTATTAGTCATCGCTATTACCATGGT  
TGAGCCCCACGTTCTGCTTCACTCTCCCCATCTCCCCCCCCCTCCCCACCCCAATTTTGTATTTATTTATTTTAAATTTTGT  
CAGCGATGGGGGCGGGGGGGGGGGGGGGGGGGGGGGGGGGGGGGGGGGGGGGGGGGGGGGGGGGGGGGGGGGGGGGGG  
GAGAGGTGCGCGGCGAGCCAATCAGAGCGGCGCGCTCCGAAAGTTTCTTTTATGGCGAGGCGGCGGCGGCGGCGGCGG  
AAAAAGCGAAGCGCGGGGGGGGGGGGGGGGGGGGGGGGGGGGGGGGGGGGGGGGGGGGGGGGGGGGGGGGGGGGGGG  
CCCCGGCTCTGACTGACCGGCTTACTCCACAGGTGAGCGGGCGGGACGCGCCCTTCTCCTCCGGGCTGTAATTAGCGCTT  
TTAATGACGGCTCGTTTCTTTCTGTGGCTGCGTGAAGGCTTAAAGGGCTCCGGGAGGGCCCTTGTGCGGGGGGGAGCGGC  
TCGGGGGGTGCCTGCGTGTGTGTGCGTGGGGAGCGCCGCTGCGGCCCGCGCTGCCCGGCGGCTGTGAGCGCTGCGGG  
CGCGGCGCGGGCTTTGTGCGCTCCGCTGTGCGGAGGGGAGCGCGGCGGGGGGGGGGGGGGGGGGGGGGGGGGGGGGG  
GCGAGGGGAACAAGGCTGCGTGCAGGGTGTGTGCGTGGGGGGTGTGAGCAGGGGGTGTGGGCGCGGGCTGCGGGCTGTA  
CCCCCCCCCTGCACCCCCCTCCCGAGTTGCTGAGCACGGCCCGGCTTCCGGTGCGGGGCTCCGTACGGGGCGTGGCGCGGG  
GCTCGCCGTGCCGGGCGGGGGTGGCGGCAAGTGGGGGTGCCGGGCGGGGCGGGGCGCCCTCGGGCCGGGAGGGCTCG  
GGGGAGGGGCGCGGGGCCCCCGAGCGCGGGGGCTGTGCGAGGCGCGGGGAGCCGACCCATTGCTTTTATGGTAATCG  
TGGAGAGGGGCGCAGGACTTCTTTGCCAAATCTGTGCGGAGCCGAAATCTGGAGGCGCCCGCCAGCCCTCTAGCG  
GGCGCGGGGCAAGCGGTGCGCGCGCGGAGGAAGGAAATGGCGGGGAGGGGCTTCTGCGTGCCTGCGCGCGCCCTGCC  
CTTCTCCCTCTCCAGCCTCGGGGCTGTCCGCGGGGGACGGCTGCCTTCCGGGGGGACGGGGCAGGGGCGGGGTTCCGGCTC  
TGGCGTGTGACCGGGCGGCTTAGAGCCCTGCTAACCATGTTTCATGCCTTCTTCTTTTCTACAGCTCCTGGGCAACGTGCTG  
GTTATTGTGCTGTCTCATCATTTTGGCAAAGAATTGCGCCACCATGGTGAGCAAGGGCGAGGAGGATAACATGGCCATCAAA  
GGAGTTCATCGCTTCAAGGTGCATGAGGGCTCCGTGAACGGCCAGGTTTCGAGATCGAGGGCGAGGGCGAGGGCC  
GCCCTACGAGGCCACCCAGCCCAAGCTGAAGTGAACAGGGCTGCCCTGCGCTGGGACATCCTGTCCC  
CTCAGTTCATGTACGGCTCAAGGCCTACGTGAAGCACCCGCGGACATCCCCGACTACTTGAAGTGTCTTCCCCGAGGG  
CTTCAAGTGGGAGCGGTGATGAAGTTCGAGGACGGCGGGCTGGTACCCTGACCCAGGACTCCTCCTGCAGGACGGCGA  
GTTTCATCTACAAGGTGAAGTGCAGCGCACCAACTTCCCTCCGACGGCCCCGTAATGCAGAAGAAGACCATGGGCTGGGA  
GGCCTCCTCGAGCGGATGTACCCCGAGGACGGCGCCCTGAAGGGCGAGATCAAGCAGAGGCTGAAGTGAAGGACGGCG  
GCCACTACGCTGAGTCAAGACCACCTACAAGGCCAAGAAGCCGCTGACGTGCCCGGCGCTCAACAGTCAACATCA  
AGTTGGACATCACTCCACAACGAGGACTACACCATCGTGAACAGTACGAACGCGCCGAGGGCGCCACTCCACCGCG  
GCATGGACGAGCTGACGCGTCTGGAGGCGCCACCAATTTAGCCTGCTGAAACAGGCTGGCGACGTGGAAGAGAACCCTG  
GACCTGGACAAAAGTCGGTAGCAAGGGCGAGGAGCTGTTACCAGGGGTGGTGCCATCCTGGTCGAGCTGGACGGCGACG  
TAAACGGCCACAAGTTCAGCGTGTCCGGCGAGGGCGAGGGCGATGCCACCTACGGCAAGCTGACCTGACAGTTCATCTGCA  
CCACCGGCAAGCTGCCCGTCCCTGCCACCCCTGACACCCCTGACCTACGGCGTGCAGTGTTCAGCTGCTACCCGCA  
CCACATGAAGCAGCAGCACTTCTTCAAGTCCGCTATGCCCGAAGGCTACGTCCAGGAGCGCACCATCTTCTTCAAGGACGAC  
GGCAACTACAAGACCCGCGCCGAGGTGAAGTTCGAGGGCGACACCCTGGTGAACCGCATCGAGCTGAAGGGCATCGACTTC  
AAGGAGGACGGCAACATCTGGGGCACAAGCTGGAGTACAACCTACAACAGCCACTAGGTTCTATATCATGGCCGACAAGCA  
GAAGAACGGCATCAAGGTGAATTCAGATCCGCCACAACATCGAGGACGGCAGCGTGCAGCTGCGCGACCACTACCAGCA  
GAACACCCCATCGGCGACGGCCCCGTGCTGCTGCCGACAACCCTACCTGAGCACCCAGTCCGCGCTGAGCAAAGACCC  
CAACGAGAAGCGCGATCACATGGTCTGCTGGAGTTCGTGACCGCCGCGGGATCACTCTCGGCATGGACGAGCTGACAA  
GTAA GAATTAACCTCCTCAGGTGCAGGCTGCCTATCAGAAGGTGGTGGCTGGTGTGGCAATGCCCTGGCTCACAATACTACTG  
AGATCTTTTCCCTCTGCCAAAATATGGGGACATCATGAAGCCCTTGAAGTCTGACTTCTGGCTAATAAAGGAAATTTATTT  
TCATTGCAATAGTGTGTTGGAATTTTTGTGTCTCTCACTCGGAAGGACATATGGGAGGGGTGACAATCAACCTCTGGATTACA  
AAATTTGTGAAAGATTGACTGGTATTCTTAACTATGTTGCTCCTTTTACGCTATGTGGATACGCTGCTTAAATGCCTTTGTATCATG  
CGTTAACTAACTTGTATTGACGCTTAAATGGTTACAATAAAGCAATAGCATCACAATTTACAATAAAGCAATTTTTTTTAC  
TGCATTCTAGTTGTGGTTTGTCCAAACTCATCAATGTATCTTATCATGTCTGGAATTGACTCAAATGATGTCAATTAGTCTATCAGA  
AGCTATCTGGTCTCCCTCCGGGGGACAAGACATCCCTGTTAATATTTAACAGCAGTGTCCCAAACCTGGGTTCTTATATCCCT  
TGCTCTGGTCAACCAGGTTGCAGGGTTTCTGTCTCACAGGAACGAAGTCCCTAAAGAAACAGTGGCAGCCAGGTTTACGCC  
GGAATTGACTGGATTCCTTTTTAGGGCCATTGGTATGGCTTTTTCCCCGATCCCCCAGGTGTCTGCAGGCTCAAAGAGCAG  
CGAGAAGCGTTCAGAGGAAAGCGATCCCGTGCACCTTCCCCGTGCCGGGCTGTCCCGCACGCTGCCGCTCGGGATGC  
GGGGAGCGCCGAGCCGAGCGGAGCCCGGGCTCGCTGCCCTAGCCCTAGCGGGGAGGACGTAATTAATCCCTG  
GGGGCTTTGGGGGGGGGCTGTCCCTGATATCTATAACAAGAAAATATATATAATAAGTTATCACGTAAGTAGAACATGAAATAA  
CAATATAATTATCGTATGAGTTAAATCTTAAAAGTCAAGTAAAAGATAATCATGCGTCAATTTGACTCACGCGGTGTTATAGTTCA  
AAATCAGTGACACTTACCGCATTGACAAGCAGCCCTCACGGGAGCTCCAAGCGGGGACTGAGATGTCTAAATGCACAGCGCAG  
GATTCGCGCTATTTAGAAAAGAGAGCAATATTTCAAGAATGCATGCTCAATTTTACGCAGACTATCTTTCTAGGGTTAATCTAG  
CTGCATCAGGATCATATCGTGGTCTTTTTTCCGGTCTCAGTCACTGCCAAAGCTGGCGCTACTGGGCATCGGGGAGGAAGAA  
GCCCGTGCCTTTTCCGCGAGGTTGAAGCGGCATGGAAAGAGTTTGGCGAGGATGACTGCTGCTGCATTGACGTTGAGCGAAA  
ACGCACGTTTACCATGATGATTCGGGAAGGTGTGGCCATGCACGCCCTTAAACGGTGAAGTTCGTTACAGCCACTGGGATAC

CAGTTCGTCGCGGCTTTTCCGGACACAGTTCGGATGGTCAGCCGAAGCGCATCAGCAACCCGAACAATACCGGCGACAGCC  
 GGAAGTCCCGTGCCGGTGTGCAGATTAATGACAGCGGTGCGGCGCTGGGATATTACGTCAGCGAGGACGGGTATCCTGGCTG  
 GATGCCGCAGAAATGGACATGGATACCCCGTGAGTTACCCGGCGGGCGCGCTTGGCGTAATCATGGTCATAGCTGTTTCCTGT  
 GTGAAATTGTTATCCGCTCACAATTCACACAACATACGAGCCGGAAGCATAAAGTGTAAGCCTGGGGTGCCTAATGAGTGAG  
 CTAAGTACATTAATTGCGTTGCGCTCACTGCCCGCTTTCCAGTCGGGAAACCTGTGCTGCCAGCTGCATTAATGAATCGGCCAA  
 CGCGCGGGGAGAGGCGGTTTGGCATTGGGGCGCTCTTCCGCTTCCCTCGCTCACTGACTCGCTGCGCTCGGTCGTTCCGGCTGCG  
 GCGAGCGGTATCAGTCACTCAAAGGCGGTAATACGGTTATCCACAGAATCAGGGGATAACGCAGGAAAGAACATGTGAGCAAA  
 AGGCCAGCAAAAGGCCAGGAACCGTAAAAAGGCCGCGTTGCTGGCGTTTTTCCATAGGCTCCGCCCCCTGACGAGCATCACA  
 AAAATCGACGCTCAAGTCAGAGGTGGCGAAACCCGACAGGACTATAAAGATACCAGGCGTTTTCCCCCTGGAAGCTCCCTCGTGC  
 GCTCTCCTGTTCCGACCCTGCCGTTACCGGATACCTGTCCGCTTTCTCCCTTCGGGAAGCGTGGCGCTTTCTCATAGCTCAC  
 GCTGTAGGTATCTCAGTTCGGTGTAGGTCGTTCCGCTCCAAGCTGGGCTGTGTGCACGAACCCCGTTCCAGCCCCGACCGCTGC  
 GCCTTATCCGGTAACTATCGTCTTGAGTCCAACCCGGTAAGACAGGACTTATCGCCACTGGCAGCAGCCACTGGTAACAGGATT  
 AGCAGAGCGAGGTATGTAGGCGGTGCTACAGAGTTCCTGAAGTGGTGGCCTAACTACGGCTACACTAGAAGGACAGTATTTGGT  
 ATCTGCGCTCTGCTGAAGCCAGTTACCTTCGGAAAAAGAGTTGGTAGCTCTTGATCCGGCAAAACAAACCACCGCTGGTAGCGGT  
 GGTTTTTTTGTGTTGCAAGCAGCAGATTACGCGCAGAAAAAAGGATCTCAAGAAGATCCTTTGATCTTTTCTACGGGGTCTGACG  
 CTCAGTGAACGAAAACCTCACGTTAAGGGATTTTGGTCATGAGATTATCAAAAAGGATCTTACCTAGATCCTTTTAAATTAATAA  
 GAAGTTTTAAATCAATCTAAAGTATATATGAGTAAACTTGGTCTGACAGTTACCAATGCTTAATCAGTGAGGCACCTATCTCAGCG  
 ATCTGTCTATTTTCGTTTCATCCATAGTTGCCTGACTCCCCGTCGTGTAGATAACTACGATACGGGAGGGCTTACCATCTGGCCCCA  
 GTGCTGCAATGATACCGCGAGACCCACGCTACCCGCTCCAGATTTATCAGCAATAAACCCAGCCAGCCGGAAGGGCCGAGCGC  
 AGAAGTGGTCTGCAACTTTATCCGCTCCATCCAGTCTATTAATTGTTGCCGGGAAGCTAGAGTAAGTAGTTCGCCAGTTAATA  
 GTTTGCCAACGTTGTTGCCATTGCTACAGGCATCGTGGTGTACGCTCGTGGTGGTATGGCTTCATTACGCTCCGGTTCCCA  
 ACGATCAAGGCGAGTTACATGATCCCCATGTTGTGCAAAAAAGCGGTTAGCTCCTTCGGTCTCCGATCGTTGTGAGAAGTAAG  
 TTGGCCGCAAGTGTATCACTCATGGTTATGGCAGCACTGCATAATTCTTACTGTCATGCCATCCGTAAGATGCTTTTCTGTGAC  
 TGGTAGACTCAACCAAGTCACTTCTGAGAATAGTGTATGCGGCGACCGAGTTGCTCTTCCCGCGCTCAATACGGGATAATAC  
 CGCGCCACATAGCAGAACTTTAAAAGTGTCTCATATTGGAAAACGTTCTTCGGGGCGAAAACTCTCAAGGATCTTACCGCTGTTG  
 AGATCCAGTTCGATGTAACCCACTCGTGCACCCAAGTATCTTACGATCTTTTACTTTCACCAGCGTTTCTGGGTGAGCAAAAA  
 CAGGAAGGCCAAAATGCCGCAAAAAAGGAATAAGGGCGACACGAAATGTTGAATACTCAT

**2.2.10 Vector 63: Pyl tRNA<sub>CUAG(Ev1)</sub> PylRS mCherry-P2A-eGFP(150CTAG)**

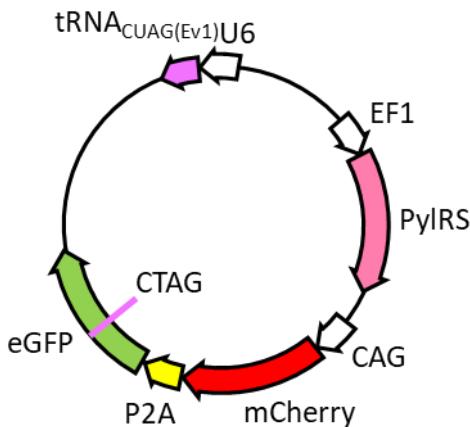

ACTCTTCTTTTCAATATTATTGAAGCATTATCAGGGTATTGTCTCATGAGCGGATACATATTTGAATGTATTTAGAAAAATAAA  
 CAAATAGGGGTTCCGCGCACATTTCCCGGAAAAGTGCCACCTAAATTTGTAAGCGTTAATATTTTGTAAAATTCGCGTTAAATTTTT  
 GTTAAATCAGCTCATTTTTTAACCAATAGGCCGAAATCGGCAAAATCCCTTATAAATCAAAGAATAGACCGAGATAGGGTTGAGT  
 GTTGTCCAGTTTGGAAACAAGTCCACTATTAAGAACGTGGACTCAACGTCAAAGGGCGAAAAACCGTCTATCAGGGCGAT  
 GGCCCACTACGTGAACCATCACCTAATCAAGTTTTTTGGGGTCGAGGTGCCGTAAGCACTAAATCGGAACCCCTAAAGGGAGC  
 CCCCATTAGAGCTTGACGGGGAAAGCCGGCGAACGTGGCGAGAAAGGAAGGAAAGAAAGCGAAAGGAGCGGGCGCTAGGG  
 CGCTGGCAAGTGTAGCGGTCACGCTGCGCGTAACCACCACACCCGCGCGCTTAATGCGCCGCTACAGGGCGCGTCCCATTC  
 GCCATTCAGGCTGCGCAACTGTTGGGAAGGGCGATCGGTGCGGGCCTCTTCGCTATTACGCCAGCTGGCGAAAGGGGGATGT  
 GCTGCAAGGCGATTAAGTTGGTAAACGCCAGGGTTTTCCAGTACGACGTTGTA AACGACGCGCCAGTGAGCGCGCTCGTT  
 CATTACGTTTTTTGAACCCGTGGAGACGGGCAGACTCGCGGTGCAAAATGTGTTTTACAGCGTGATGGAGCAGATGAAGATGCT  
 CGACACGCTGCAGAACACGCAGCTAGATTAACCCTAGAAAGATAATCATATTGTGACGTACGTTAAAGATAATCATGCGTAAAATT  
 GACGCATGTGTTTTATCGTCTGTATATCGAGGTTATTTATTAATTTGAATAGATTAAGTTTTATTATTTACACTTACATACTA  
 ATAATAAATTAACAAACAATTTATTTATGTTATTTATTTATTA AAAAAAACA AAAA ACTCAAAATTTCTTCTATAAAGTAAACAAA  
 TTATGAGGGACAGCCCCCCCCAAAGCCCCAGGGATGTAATACGTCCTCCCCCGCTAGGGGGCAGCAGCGAGCCGGCCCG  
 GGGCTCCGCTCCGGTCCGGCTCCCGCGTCCCGCGTCCCGGAGCCGCGTCCCGGAGACAGCCCGGACAGCCGGGAAAGGTGG  
 CACGGGATCGTTTTCTCTGAACGTTCTCGCTGCTCTTTGAGCCTGCAGACACCTGGGGGATACGGGAAAAGGCCATAAAAA  
 CCGCACTTGTCCGAAACCCCGGGAATCTAACCCGGCTGAACGGGTTCTAGGCCATTGATCTACATGATCAGGTTCCG  
 GTGTTTCGTCCTTTCCACAAGATATATAAAGCCAAGAAATCGAAACTTTCAAGTTACGGTAAGCATATGATAGTCCATTTTAAAA  
 CATAATTTTAAAACGCAAACACCCCAAGAAATTTACTTCTACGTCACGATTTTTGACTAATATCTTTGTGTTACAGTCAAA  
 TAATCTAATTTACTCTAACAGCTTGTATCGTATATGCAAAATGAAAGGAATCATGGGAAATAGGCCCTCTCCTGCCAAC  
 GGTTGCGATCGCTCCGGTGCCGCTCAGTGGGCAGAGCGCACATCGCCACAGTCCCGGAGAAGTTGGGGGAGGGGTTCGGCA  
 ATTGAACGGGTGCCTAGAGAAGGTGGCGCGGGTAAACTGGGAAAGTGTGCTGTAAGTGGCTCCGCTTTTTCCCGAGGGT  
 GGGGGAGAACCGTATATAAGTGCAGTAGTCGCGGTGAACGTTCTTTTTCGCAACGGGTTTGGCGCCAGAACACAGCTGAAGCTT  
 CGAGGGGCTCGCATCTCTCTTCAACGCGCCCGCCCTACCTGAGGCCGCATCCACGCGGATTTGAGTCCGCTTCCGCGC  
 CTCGCCCTGTGGTCTCTCTGAAGTGCCTCCGCGTCTAGTGAAGTTAAAGCTCAGGTCGAGGACGGGCTTTGCTGGCGC  
 CTCCCTGGAGCCTACCTAGACTCAGCCGCTCTCCACGCTTTGCTGACCTGCTTGTCTCAACTCTACGCTTTTGTTCGTTTT  
 CTGTTCTGCGCGTTACAGATCCAAGCTGTGACCGGCGCCTACTCTACAGATAGCGTTAAACTTACGCTTGCACCAATGGCTA

CGGACTACAAGGACGACGACGACAAGGACAAGAAGCCCCTGAACACCCTGATCAGCGCCACAGGACTGTGGATGTCCAGAA  
CCGGCACCATCCACAAGATCAAGCACCACGAGGTGTCCCGTCCAAAATCTACATCGAGATGGCCTGCGGCGATCACCTGGT  
CGTCAACAACAGCAGAAGCAGCCGGACAGCCAGAGCCCTGCGGCACCACAAGTACAGAAAAGACCTGCAAGCGGTGCAGAG  
TGTCCGACGAGGACCTGAACAAGTTCCTGACCAAGGCCAACGAGGACCAGACCAGCGTGAAGTGAAGGTGGTGTCCGCC  
CCACCCGGACCAAGAAAGCCATGCCAAGAGCGTGGCCAGAGCCCAAGCCCTGAAAAACACCGAAGCCGCTCAGGCC  
CAGCCACGCGGCAGCAAGTTCAGCCCGCCATCCCCGTGTCTACCCAGGAAAGCGTCAAGCGTCCCGCCAGCGTGTCCACC  
AGCATCTCTAGCATCTCAACCGCGCCACAGTTCCTGCCCTGGTCAAGGGCAACCAACCCCATCACAGCATGTCTGCC  
CTGTGCAAGCTGTGCCACAGCCCTGACCAAGTCCCAGACCAGCCGCTGGAAGTGTCTCTGAACCCCAAGGACGAGATCA  
GCCTGAACAGCGCAAGCCCTTCCGGGAGCTGGAAGCGAGCTGCTGAGCCGGCGGAAGAAGGACCTCCAGCAAATCTACG  
CCGAGGAACGGGAGAAGTACCTGGGCAAGCTGGAAGAGAGATCACCCGGTCTTCTGTGGACCGGGGCTTCTGGAATCA  
AGAGCCCATCTGTATCCCTGGAGTACATCGAGCGGATGGGCATCGACAACGACACCGAGCTGAGCAAGCAGATTTCCG  
GGTGGACAAGAACTTCTGCCTGCGGCCATGCTGGCCCCAACCTGTACAACCTCTGCGGAACTGGATGCGCTGTGCC  
GACCCCAAGATTTTTCAGATCGGCCCTGCTACCGGAAAGAGAGCAGCGCAAAGAGCAGCTGGAAGAGTTTACAATGC  
TGAACTTTTGCCAGATGGGACGCGCTGCACCAGAGAGAACCTGGAATCCATCATCACCGACTTTCTGAACCACCTGGGGAT  
CGACTTCAAGATCGTGGGCGACAGTGCATGGTGTACGGCGACACCCTGGACGTGATGCACGGCGACCTGGAAGTGTCTAG  
CGCCGTCTGGGACCCATCCCTCTGGACCGGGAGTGGGGCATCGATAAGCCCTGGATCGGAGCCGGCTTCCGCCCTGGAACG  
GCTGTGAAAGTCAAGCACACTTTAAGAACAATCAAGCGGGCTGCCAGAAGCGAGAGCTACTACAACGGCATCAGCACAA  
CTGTGATGATAAGGATCCACTAGTCCAGTGTGGTGAATTGACATTGATTATTGACTAGTTATTAATAGTAAATACGGGGT  
CATTAGTTCATAGCCCATATATGGAGTTCCGCGTTACATAAATTACGGTAAATGGCCCGCTGGCTGACCGCCCAACGACCC  
GCCATTGACGTCAATAATGACGTATGTTCCCATAGTAACGCCAATAGGGACTTTCCATTGACGTCAATGGGTGGAGTATTTACG  
GTAAACTGCCACTTGGCAGTACATCAAGTGTATCATATGCCAAGTACGCCCCCTATTGACGTCAATGACGGTAAATGGCCCGC  
TGGCATTATGCCAGTACATGACCTTATGGGACTTTCTACTTGGCAGTACATCTACGTATTAGTACATCGCTATTACCATGGTCA  
GGTGAAGCCACGTTCTGCTTACTCTCCCCATCTCCCCCTCCCCACCCCAATTTTGTATTTATTTATTTTAAATATTTT  
TGCAGCATGGGGCGGGGGGGGGGGGGGGGGGGGGGGGGGGGGGGGGGGGGGGGGGGGGGGGGGGGGGGGGGGGGGGGG  
GGAGAGGTGCGGCGGCAGCCAATCAGAGCGGCGCGCTCCGAAAGTTTCTTTTTATGGCGAGGCGGGCGGCGGGCGGGCCCT  
ATAAAAAGCGAAGCGCGCGGGGGGGGGGGGGGGGGGGGGGGGGGGGGGGGGGGGGGGGGGGGGGGGGGGGGGGGGGGGG  
CGCCCCGGCTCTGACTGACCGCTTACTCCACAGGTGAGCGGGCGGGACGGCCCTTCTCTCCGGGCTGTAATTAGCGCTTG  
GTTAATGACGGCTCGTTTCTTTCTGTGGCTGCGTGAAGCCCTAAAGGGTCCGGGAGGGCCCTTTGTGCGGGGGGGAGCG  
GCTCGGGGGGTGCGTGTGTGTGTGCGTGGGGAGCGCCCGTGCAGCCCGCGCTGCCCGCGCTGCCCGCGGCTGTGAGCGCTGC  
GGCGCGCGCGGGGCTTTGTGCGCTCCGCGTGTGCGGAGGGGAGCGCGGGCGGGGGCGGTGCCCGCGGTGCGGGGGG  
GCTGCGAGGGGAACAAAGGCTGCGTGGGGGTGTGTGCGTGGGGGGGTGAGCAGGGGGTGTGGCGCGGGCGGTGCGGGCTG  
TAACCCCGCTGACCCCGCTCCCGAGTTGCTGAGCACGGCCCGCTTCCGGTGCGGGGCTCCGTACGGGGCGTGGCGC  
GGGGCTCGCCGTCCGGCGGGGGGGTGGCGCAGGTGGGGGTCCGGGGCGGGGGCGGGGGCGCTCGGGCCGGGGAGGG  
CTCGGGGGAGGGGGCGGGGGGGGGGGGGGGGGGGGGGGGGGGGGGGGGGGGGGGGGGGGGGGGGGGGGGGGGGGGGGG  
ATCGTGCAGAGGGGGCAGGGACTTCTTTGTCCAAATCTGTGCGGAGCCGAAATCTGGAGCGCCCGCGCACCCCTCTA  
GCGGGCGCGGGGCGAAGCGGTGCGGCGCCGGCAGGAAGGAAATGGGCGGGGAGGGCCTTCTGTGCGTGCAGCGCCCGCT  
CCCTTCTCCCTCTCCAGCCTCGGGGCTGTCCGCGGGGGGACGGCTGCCTTCCGGGGGGGACGGGGCAGGGCGGGGTTCCGG  
TTCTGGCGTGTGACCGGGGCTCTAGAGCCTCTGTAACCATGTTTCATGCCTTCTTTTCTTCTTCTTCTTCTTCTTCTTCT  
TGTTATTGTCTGTCTCATATTTGGCAAAGAATTCGCCACCATGGTGGACAGGGCGAGGAGGATAACATGGCCATCATCA  
AGGAGTTCATCGCTCAAGGTGACATGGAGGCTCCGTGAAGGCCACGAGTTCGAGATCGGGCGAGGCGAGGCGAGGCGA  
GCCCTACGAGGGCACCCAGACCGCCAAGCTGAAGGTGACCAAGGGTGGCCCCCTGCCCTTGCCTGGGACATCCTGTCCC  
CTCAGTTCATGTACGGCTCAAGGCTACGTGAAGCACCCCGCCGACATCCCCGACTACTTGAAGCTGTCTTCCCCGAGGG  
CTTCAAGTGGGAGCGCGTGTAACTTCGAGGACGGCGGGCTGGTACCCTGACCCAGGACTCCTCCCTGCAGGACGGCGA  
GTTTATCTACAAGGTGAAGCTGCGCGGCACCAACTTCCCTCCGAGGGCCCGTAATGCAGAAGAAGACCATGGGCTGGGA  
GGCCTCTCGAGCGGATGACCCCGAGGACGGCCCTGAAGCGGAGATCAAGCAGAGGTAAGCTGAAGGACGGCGG  
GCCACTACGAGCTGAGTCAAGACCACCTACAAGGCCAAGAAGCCCGTGCAGCTGCCCGGCGCTACAACGTCAACATCA  
AGTTGGACATCACCTCCACAACGAGGACTACACCATCGTGAACAGTACGAACGGCGCCGAGGGCCGCCACTCCACCGGG  
GCATGGACGAGCTGTACGCGTCTGGAGGCGCCACCAATTTACGCTGCTGAAACAGGCTGGCGACGTGGAAGAGAACCCTG  
GACCTGGACAAAAGTCCGTGAGCAAGGGCGAGGAGCTGTTACCCGGGGTGGTCCCATCTGGTGCAGCTGGACGGCGACG  
TAAACGGCCACAAGTTCAGCGTGTCCGGCGAGGGCGAGGCGATGCCACTACGGCAAGCTGACCTGAAGTTCATCTGCA  
CCACCCGCAAGCTGCCGTGCCCTGGCCACCCTCGTACACCCTGACCTACGGCGTGCAGTGCCTCAGCCGCTACCCCGA  
CCACATGAAGCAGCAGACTTCTTCAAGTCCGCCATGCCGGAAGGCTACGTCCAGGAGCGCACCATCTTCTTCAAGGACGAC  
GGCAACTACAAGACCCGCGCCGAGGTGAAGTTCGAGGGCGACACCCTGGTGAACCGCATCGAGCTGAAGGGCATCGACTTC  
AAGGAGGACGGCAACATCTGGGGCACAAGCTGGAGTACAACAGCCACTAGGCTATATCATGGCCGACAAGCA  
GAAGAACGGCATCAAGGTGAATTCAGATCCGCCACAACATCGAGGACGGCAGCGTGCAGCTGCGCGACCACTACAGCA  
GAACACCCCATCGGCGACGGCCCGTGTGCTGCCGACAACCACTACCTGAGCACCCAGTCCCGCTGAGCAAAGACCC  
CAACGAGAAGCGGATCACATGGTCTGCTGGAGTTCGTGACCGCCGCGGGGATCACTCTCGGCATGGACGAGCTGTACAA  
GTAAGAATCACTCCTCAGGTGCAGGCTGCCTATCAGAAGGTGGTGGCTGGTGTGGCCAATGCCCTGGCTCACAATACCACTG  
AGATCTTTTTCCCTCTGCCAAAATATGGGGACATCATGAAGCCCTTGGATCTGACTTCTGGCTAATAAAGGAAATTTATTT  
TCATTGCAATAGTGTGTTGGAATTTTTGTGTCTCTCACTCGGAAGGACATATGGGAGGGTGCACAATCAACCTCTGGATTACA  
AAATTTGTGAAAGATTGACTGGTATTCTTAACTATGTTGCTCCTTTTACGCTATGTGGATACGCTTTAATGCCCTTTGTATCATG  
CGTTAACTAAACTTGTATTGACGCTTATAATGGTTACAAATAAAGCAATAGCATCACAAATTTACAAATAAAGCATTTTTTTCAC  
TGCATTCTAGTTGTGGTTTGTCCAAACTCATCAATGTATCTTATCATGTCTGGAATTGACTCAAATGATGTCAATTAGTCTATCAGA  
AGCTATCTGGTCTCCCTCCGGGGGACAAGACATCCCTGTTAATATTTAAACAGCAGTGTCCCAAACCTGGGTTCTTATATCCCT  
TGCTCTGGTCAACAGGTTGCAGGGTTTCTGTCTCACAGGAACGAAGTCCCTAAAGAAACAGTGGCAGCCAGGTTTAGCCCC  
GGAATTGACTGGATTCCTTTTTAGGGCCATTGGTATGGCTTTTCCCGTATCCCCCAGGTGTCTGCAGGCTCAAAGAGCAG  
CGAGAAGCGTTAGAGGAAAGCGATCCCGTCCACTTCCCGTCCCGGCTGCCCCGACGCTGCCCCGCGGCTCGGGGATGC  
GGGGGGAGCGCCGACCGGAGCGGAGCCCGGGCGGCTCGCTGCTGCCCTAGCGGGGGAGGGACGTAATTACATCCCTG  
GGGGCTTTGGGGGGGGGCTGTCCCTGATATCTATAACAAGAAAATATATATAATAAGTTATCACGTAAGTAGAACATGAAATAA  
CAATATAATTATCGTATGATTAATCTTAAAAGTACAGTAAAAGATAATCATGCGTCATTTTGACTCACGCGGTGTTATAGTTCA  
AATCAGTGACACTTACCGCATTGACAAGCAGCGCTCACGGAGCTCAAGCGGCGACTGAGATGTCTTAAATGCACAGCGCAG  
GATTCGCGCTATTTAGAAAAGAGAGCAATATTTCAAGAATGCATGCGTCAATTTTACGAGACTATCTTCTTAGGGTTAATCTAG  
CTGCATCAGGATCATATCGTCCGGTCTTTTTTCCGGCTCAGTCATCGCCAAGCTGGCGCTATCTGGGCATCGGGGAGGAAGAA  
GCCCCGTGCTTTTTCCCGCGAGGTTGAAGCGCATGGAAGAGTTCGCCGAGGATGACTGCTGCTGCATTGACGTTGAGCGAAA

ACGCACGTTTACCATGATGATTTCGGGAAGGTGTGGCCATGCACGCCCTTTAACGGTGAAGTGTTCGTTTCAGGCCACCTGGGATAC  
 CAGTTCGTCGCGGCTTTTCCGGACACAGTTCGGATGGTCAGCCCGAAGCGCATCAGCAACCCGAACAATACCGGCGACAGCC  
 GGAAGTGCCTGCGGGTGTGCAGATTAATGACAGCGGTGCGGCGCTGGGATATTACGTCAGCGAGGACGGGTATCCTGGCTG  
 GATGCCGCAGAAATGGACATGGATACCCCGTGAGTTACCCGGCGGGCGCGCTTGGCGTAATCATGGTCATAGCTGTTTCCTGT  
 GTGAAATTGTTATCCGCTCACAATTCACACAACATACGAGCCGGAAGCATAAAGTGTAAAGCCTGGGGTGCCTAATGAGTGAG  
 CTAATCACAATTAATTGCGTTGCGCTCACTGCCCGCTTCCAGTCCGGAAACCTGTCGTGCCAGCTGCATTAATGAATCGGCCAA  
 CGCGCGGGGAGAGGCGGTTTTCGATTTGGCGCTCTCCGCTTCCTCGTCACTGACTCGTGCCTCGGTCGTTCCGGCTGCG  
 GCGAGCGGTATCAGCTCACTCAAAGCGGTAATACGTTATCCACAGAATCAGGGGATAACGCAGGAAAGAACATGTGAGCAAA  
 AGGCCAGCAAAAGGCCAGGAACCGTAAAAAGGCCGCGTTGCTGGCGTTTTTCCATAGGCTCCGCCCCCTGACGAGCATCACA  
 AAAATCGACGCTCAAGTCAGAGGTGGCGAAACCCGACAGGACTATAAAGATACCAGGCGTTTCCCCCTGGAAGCTCCCTCGTGC  
 GCTCTCCTGTTCCGACCCGCGCTTACCGGATACCTGTCCGCTTTCTCCCTTCGGGAAGCGTGGCGCTTTCTCATAGCTCAC  
 GCTGTAGGTATCTCAGTTCGGTGTAGGTGCTTCCGCTCAAGCTGGGCTGTGTGCACGAACCCCCGTTACGCCGACCGCTGC  
 GCCTTATCCGGTAACTATCGTCTTGTAGTCCAACCCGGTAAGACACGACTTATCGCCACTGGCAGCAGCCACTGGTAACAGGATT  
 AGCAGAGCGAGGTATGTAGGCGGTGTACAGAGTTCTTGAAGTGGTGGCTAACTACGGCTACACTAGAAGGACAGTATTTGGT  
 ATCTGCGCTCTGCTGAAGCCAGTTACCTTCGAAAAAGAGTTGGTAGCTCTTGATCCGGCAAAACAAACCACCGCTGGTAGCGGT  
 GGTTTTTTTGTGCAAGCAGCAGATTACGCGCAGAAAAAAGGATCTCAAGAAGATCCTTTGATCTTTTCTACGGGGTCTGACG  
 CTCAGTGAACGAAAACCTCACGTTAAGGGATTTTGGTCATGAGATTATCAAAAAGGATCTTCACCTAGATCCTTTTAAATTAATAA  
 GAAGTTTAAATCAATCTAAAGTATATATGAGTAAACTTGGTCTGACAGTTACCAATGCTTAATCAGTGAGGCACCTATCTCAGCG  
 ATCTGTCTATTTTCGTTTCATCCATAGTTGCCGACTCCCGCTGCTGTAGATAACTACGATACGGGAGGGCTTACCATCTGGCCCCA  
 GTGCTGCAATGATACCGCGAGACCCACGCTCACCGGCTCCAGATTTATCAGCAATAAACAGCCAGCCGGAAGGGCCGAGCGC  
 AGAAGTGGTCTGCAACTTTATCCGCTCCATCCAGTCTATTAATTGTTGCCGGGAAGCTAGAGTAAGTAGTTCGCCAGTTAATA  
 GTTTGCGCAACGTTGTTGCCATTGCTACAGGCATCGTGGTGTACGCTCGTCTTTGGTATGGCTTATTAGCTCCGGTTCCCA  
 ACGATCAAGGCGAGTTACATGATCCCCATGTTGTGCAAAAAAGCGTTAGCTCCTTCGGTCTCCGATCGTTGTGAGAAGTAAG  
 TTGGCCGAGTGTATCACTCATGGTTATGGCAGCACTGCATAATTTCTTACTGTGCATGCCATCCGTAAGATGCCATTTCTGTGAC  
 TGGTGTAGTACTCAACCAAGTCATTCTGAGAATAGTGTATGCGGGCAGCGAGTTGCTCTTGGCCGCGTCAATACGGGATAATAC  
 CGCGCCACATAGCAGAACCTTAAAGTGCTCATATTGAAAACGTTCTTCGGGGCGAAAACCTCTCAAGGATCTTACCGCTGTTG  
 AGATCCAGTTCGATGTAACCCACTCGTGCACCCAACTGATCTTCAGCATCTTTTACTTTTACCAGCGTTTTCTGGGTGAGCAAAAA  
 CAGGAAGGCCAAAATGCCGCAAAAAAGGAATAAGGGCGACACGGAAATGTTGAATACTCAT

2.2.11 Vector 64: Pyl tRNA<sub>UCCU</sub> PylRS mCherry-P2A-eGFP(150AGGA)

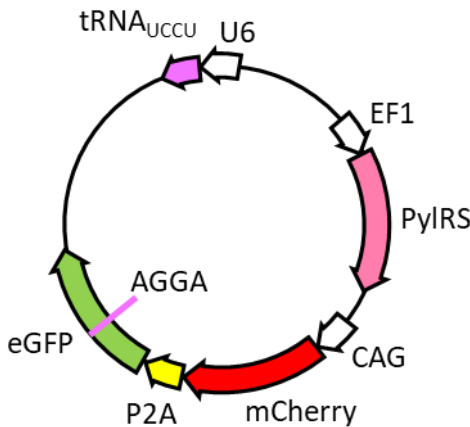

ACTCTTCCTTTTTCAATATTATTGAAGCATTATCAGGGTTATTGTCTCATGAGCGGATACATATTTGAATGTATTTAGAAAAATAAA  
 CAAATAGGGGTTCCGCGCACATTTCCCGGAAAAGTGCCACCTAAATTGTAAGCGTTAATATTTTGTAAAATTCGCGTTAAATTTTT  
 GTTAAATCAGTCAATTTTTAACCAATAGGCCAAAATCGGCAAAATCCCTATAAATCAAAGAATAGACCCAGATAGGGTTGAT  
 GTTGTCCAGTTTGAACAAGAGTCCACTATTAAGAACGTGGACTCCAACGTCAAAGGGCGAAAAACCGTCTATCAGGGCGAT  
 GGCCCACTACGTGAACCATCACCTAATCAAGTTTTTTGGGGTCGAGGTGCCGTAAGCACTAAATCGGAACCCCTAAAGGGAGC  
 CCCCATTAGAGCTTGACGGGGAAAGCCGGCGAACGTGGCGAGAAAGGAAGGGAAGAAAGCGAAAGGAGCGGGCGCTAGGG  
 CGCTGGCAAGTGTAGCGGTCACGCTGCGGTAACCACCACACCCGCCGCGCTTAATGCGCCGCTACAGGGCGCGTCCCATT  
 GCCATTAGGCTGCGCAACTGTTGGGAAGGGCGATCGGTGCGGGCCTCTTCGCTATTACGCCAGCTGGCGAAAGGGGATGT  
 GCTGCAAGGCGATTAAGTTGGGTAACGCCAGGTTTTCCAGTCACGACGTTGTAACCGACGCGCCAGTGAGCGCGCCTCGTT  
 CATTACGTTTTTGAACCCGTGGAGGACGGGCAGACTCGCGGTGCAAAATGTGTTTTACAGCGTGATGGAGCAGATGAAGATGCT  
 CGACACGCTGCAGAACACGCAGCTAGATTAACCCTAGAAAGATAATCATATTGTGACGTACGTTAAAGATAATCATGCGTAAAAT  
 GACGCATGTGTTTTATCGTCTGTATATCGAGGTTTTATTAATTTGAATAGATTAAGTTTTATATTTACACTTACATACTA  
 ATAATAAATCAACAAAATTTATGTTTTATTTATTTAAAAAACAAAACCTAAATTTCTTATAAAGTAAACAAAACCT  
 TTATGAGGGACAGCCCCCCCCAAAGCCCCAGGAGTATAATTACGTCCTCCCCGCTAGGGGGCAGCAGCGAGCCGCCCG  
 GGGCTCCGCTCCGGTCCGGCGCTCCCCCGCATCCCCGAGCCGGCAGCGTGCGGGGACAGCCGGGCAGGGGAAGGTGG  
 CACGGGATCGTTTTCTCTGAACGTTCTCGCTGCTTTGAGCCTGCAGACACCTGGGGGATACGGGAAAAGGCCTAAAA  
 CCGCACTTGTCCGAAACCCCGGGAATCTAACCCGGCTGAACGGATTAGGAAGTCCATTGATCTACATGATCAGGTTCCG  
 GTGTTTCGTCCTTTCCACAAGATATAAAGCCAAGAATCGAAACTTTCAAGTTACGGTAAGCATATGATAGTCCATTTTAA  
 CATAATTTAAAATGCAACTACCAAGAAATTTACTTTTACGTCAGTATTTTGTACTAATATCTTTGTTTACAGTCAA  
 TAATTTCTAATATCTCTCTAACAGCCTTGATCGTATATGCAAAATGAAGGAATCATGGGAAATAGCCCCCTTCTGCCCCAAC  
 GGTTGCGATCGCTCCGGTGCCGTCAGTGGGCAGAGCGCACATCGCCACAGTCCCCGAGAAGTTGGGGGAGGGGTCCGCA  
 ATTGAACGGGTGCTAGAGAAGGTGGCGCGGGGTAAACTGGGAAAGTGATGTCGTGACTGGCTCCGCTTTTTCCCGAGGGT  
 GGGGGAGAACCGTATATAAGTGCAGTAGTCCCGTGAACGTTCTTTTTCGCAACGGGTTTCCCGCCAGAACACAGCTGAAGCTT  
 CGAGGGGCTGCATCTCTTCCAGCAGCCGCGCCCTACCTGAGGCCGCTCCACGCGGTTGAGTGCCTTCTGCCG  
 CTCCCGCTGTGGTGCCTCCTGAAGTGCCTCCGCGCTAGTAAAGTTAAAGCTCAGGTCGAGACCGGCTTTGTCCGGCG  
 CTCCCTGGAGCCTACCTAGACTCAGCCGGCTCTCCAGCTTTGCTGACCCTGCTGCTCAACTCTACGCTTTTGTTCGTTTT

CTGTTCTGCGCCGTTACAGATCCAAGCTGTGACCGGCGCCTACTCTACAGATAGCGTTAAACTTACGTTGCCACCATGGCTA  
CGACTACAAGGACGACGACGACAAGGACAAGAAGCCCCTGAACACCCTGATCAGCGCCACAGGACTGTGGATGCCAGAA  
CCGGCACCATCCACAAGATCAAGCACCACGAGGTGTCCCGGTCCAAAATCTACATCGAGATGGCCTCGGGGATCACCTGGT  
CGTCAACAACAGCAGAAGCAGCCGGACAGCCAGAGCCCTGCGGCACCACAAGTACAGAAAAGACCTGCAAGCGGTGCAGAG  
TGTCGACGAGGACCTGAACAAGTTCCTGACCAAGGCCAAGCAGGACCAGACCAGCGTGAAGTGAAGGTGGTGTCCGCC  
CCACCCTGGACCAAGAAAGCCATGCCAAGAGCGTGGCCAGAGCCCCAAGCCCCTGGAAAAACCCGAAGCCGCTCAGGCC  
CAGCCACGCGGACGAAAGTTCAGCCCGCCATCCCCGTGTCTACCCAGGAAAGCGTCAGCGTCCCCGCCAGCGTGTCCACC  
AGCATCTAGCATCTCAACCGGCGCCACAGCTTCTGCCCTGGTCAAGGGCAACACCAACCCATCACCAGCATGTCTGCC  
CTGTGCAAGCCTCTGCCCCAGCCCTGACCAAGTCCCAGACCAGCGGCTGGAAGTGTCTCTGAACCCCAAGGACGAGATCA  
GCCTGAACAGCGGCAAGCCCTCCGGGAGCTGGAAAGCGAGCTGCTGAGCCGGCGGAAGAAGGACCTCCAGCAATCTACG  
CCGAGGAACGGGAGAAGTACCTGGGCAAGCTGGAAAGGAGATACCCCGGTTCTTCTGTGGACCGGGGCTTCTGGAAATCA  
AGAGCCCCACTCTGCTCCCTGGAGTACATCGAGCGGATGGGCATGCACAACGACACCGAGCTGAGCAAGCAGATTTCCG  
GGTGGAACAAGAATCTGCTCGCGCCATGTGGCCCACTGGCCCAACTGTACAACACTACCTGCGGAAAGTGAATCGCGCTCGCC  
GACCCCATCAAGATTTTCGAGATCGGCCCTGCTACCGGAAAGAGAGCGACGGCAAGAGCACCTGGAAGAGTTTACAATGC  
TGAACTTTTGCCAGATGGGACGCGCTGCACCAGAGAGAACCTGGAATCCATCATCACCGACTTTCTGAACCACCTGGGGAT  
CGACTTCAAGATCGTGGGCGACAGCTGCATGGTGTACGGCGACACCCTGGACGTGATGCACGGCGACCTGGAAGTGTCTAG  
CGCGCTGTGGGACCCATCCCTGTGACCCGGGAGTGGGGCATGATAAGCCCTGGATCGGAGCCGGCTTCCGCTGGAAAC  
CCTGTGATGATAAGGATCCACTAGTCCAGTGGTGGAAATTGACATTGATTATTGACTAGTTATTAATAGTAATCAATTACGGGGT  
CATTAGTTCATAGCCCATATATGGAGTTCGCGGTTACATAAATTACGGTAAATGGCCCGCTGGCTGACCGCCCAACGACCCCC  
GCCATTGACGTCAATAATGACGTATGTTCCCATAGTAACGCCAATAGGGACTTTCCATTGACGTCAATGGGTGGAGTATTTACG  
GTAAACTGCCCACTTGGCAGTACATCAAGTGTATCATATGCCAAGTACGCCCTTATTGACGTCAATGACGGTAAATGGCCCGC  
TGGCATTATGCCAGTACATGACCTTATGGGACTTCTACTTGGCAGTATGCTAGTACATACGCTATTACCATGGTCCGA  
GGTGAGCCCAAGTTCGTTCACTTCCCCACTCCCCCTCCCCACCCCAATTTGTATTTTAAATTTTAAATTTTAAATTTT  
TGCAGCGATGGGGGCGGGGGGGGGGGGGGGCGCGCCAGCGGGGCGGGGCGGGGCGAGGGGCGGGGCGGGGCGAGGGC  
GGAGAGGTGCGGCGGACCAATCAGAGCGGCGCGCTCCGAAAGTTCCTTTTATGGCGAGGCGGCGGCGGCGGCGGCCCT  
ATAAAAAGCGAAGCGCGCGCGGGGCGGGAGTCTGCTGCTTCCGCCCCGTGCCCGCTCCGCGCCGCTCGCGCCGCC  
CGCCCCGGCTCTGACTGACCGCGTTACTCCCACAGGTGAGCGGGGCGGGACCGCCCTTCTCCTCCGGGCTGTAATTAGCGCTT  
GTTTAAATGACGGCTCGTTTCTTTCTGTGGCTCGTGAAGCCCTTAAAGGGCTCCGGGAGGGCCCTTTGTGCGGGGGGAGCG  
GCTCGGGGGGTGCGTGCCTGTGTGTGTGCTGGGAGCGCCCGCTGCGGCCCGCGCTGCCCGCGGGTGTGAGCGCTGCG  
GGCGCGGCGGGGCTTTGTGCGCTCCGCGTGTGCGGAGGGGAGCGCGGCGGGGCGGTGCCCGCGGTGCGGGGGG  
GCTGCGAGGGGAACAAAGGCTGCGTGGGGGTGTGTGCGTGGGGGGGTGAGCAGGGGGTGTGGCGCGGCGGTGCGGGCT  
TAAACCCCCCTGCACCCCTCCCCGAGTGTGCTGAGCAGCCCGCGCTTCCGGTGCGGGGCTCCGTACGGGCGGTGGCG  
GGGCTCGCGGTGCCGGGCGGGGGTGGCGAGTGGGGTGGCGGGGCGGGGCGGGGCGGGGCGGGGCGGGGAGGG  
CTCGGGGGAGCGCGCGGCCCGGAGCGCCGCGGCTGTCGAGGCGCGGCGAGCCGACGCCATTGCCTTTTATGGTA  
ATCGTGCAGAGGGGCGCAGGGACTTCTTTGTCCAAATCTGTGCGGAGCCGAAATCTGGGAGGCGCCGCGCACCCCTCTA  
GCGGGCGCGGGGCGAAGCGGTGCGGCGCCGGCAGGAAGGAAATGGGCGGGGAGGGCTTCTGTCGTCGCCGCGCCGCGT  
CCCCTTCTCCCTCCAGCCTCGGGGCTGTCCGCGGGGAGCGGCTGCCCTCCGGGGGAGCGGGGCGGGGCGGGGTTCCGG  
TCTGCGGTGACCGCGCTAGAGCCTCTGCTAACCATTTTCATGCCCTTCTTTTCTTACAGCTCCTGGGCAACGTGTC  
TGGTATTGTGCTGTCTCATCATTGGCAAAGAATTCGCCACCATGGTGTGAGCAGGGGCGAGGATAACATGGCCATCATCA  
AGGAGTTCATGCGCTTCAAGGTGCACATGGAGGGCTCCGTGAACGGCCACGAGTTCGAGATCGAGGGCGAGGGCGAGGGCC  
GCCCTACGAGGGCACCCAGACCGCCAAGCTGAAGGTGACCAAGGTGGCCCCCTGCCCTTCCCTGGGACATCCTGTCC  
CTCAGTTCATGTACGGCTCAAGGCCTACGTGAAGCACC CGCCGACATCCCCGACTACTTGAAGCTGTCTTCCCCGAGGG  
CTTCAAGTGGGAGCGGTGATGAACTTCGAGGACGGCGGGTGGTACCCTGACCCAGGACTCCTCCTGCGAGGACGGGA  
GTTACTACAAGGTGAAGTGCAGCGGACCAACTTCCCTCCGAGCCCGTAATGCAGAAGAAGACCATGGGCTGGCG  
GGCCTCCTCCGAGCGGATGTACCCGAGGACGGCGCCCTGAAGGGCGAGATCAAGCAGAGGCTGAAGCTGAAGGACGGCG  
GCCACTACGACGCTGAGGTCAAGACCACCTACAAGGCCAAGAAGCCCGTGCAGCTGCCCGGCGCCTACAACGTCAACATCA  
AGTTGGACATCACTCCACAACGAGGACTACACCATCGTGAACAGTACGAACGCGCCGAGGGCGCCACTCCACCGGCG  
GCATGGACGAGTGTACGCGTCTGGAGGCGCCACCAATTTACCGCTGTGAAACAGGCTGGCGACGTGGAAGAGAACCCTG  
YACCTGGACAAAAGTTCGGTGTAGCAAGGGCGAGGAGCTTTCACCGGGTGGTCCCATCCTGGTGCAGCTGGACGGCGACG  
TAAACGGCCACAAGTTACGCTGTCCGGCGAGGGCGAGGCGATGCCACCTACGGCAAGCTGACCTGAAAGTTCATCTGCA  
CCACCGGCAAGCTGCCCGTCCCTGGCCACCCCTGCTGACCACCCTGACCTACGGCGTGCAGTGTTCAGCCGCTACCCCGA  
CCACATGAAGCAGCAGACTTCTTCAAGTCCGCCATGCCGAAGGCTACGTCCAGGAGCGCACCATCTTCTTCAAGGACGAC  
GGCAACTACAAGACCCGCGCCGAGGTGAAGTTCGAGGGCGACACCCTGGTGAACCCGATCGAGCTGAAGGGCATCGACTTC  
AAGGAGGACGGCAACATCCTGGGGCACAAGCTGGAGTACAACATAACAGCCACAGGAAGTCTATATCATGGCCGACAAGCA  
GAAGAACGGCATCAAGGTGAACCTCAAGATCCGCCACAACATCGAGGACGCGAGCGTGCAGCTGCGGACCACTACCAGCA  
GAACACCCCATCGGCGACGGCCCGTGTGCTGCCGACAACCACTACCTGAGCACCCAGTCCGCCCTGAGCAAAGACCC  
CAACGAGAAGCGGATCACATGTTCTGCTGGAGTTCGTGACCGCCGCGGGATCACTCTGGCATGGACGAGCTGTACAA  
GTAAGAATCACTCCTCAGGTGCAGGCTGCCTATCAGAAGGTGGTGGCTGGTGTGGCAATGCCCTGGCTCACAATAACCACTG  
AGATCTTTTTCCCTCTGCCAAAATTTATGGGGACATCATGAAGCCCTTGGCATCTGACTTCTGGCTAATAAAGGAAATTTATTT  
TCATTGCAATAGTGTGTTGGAATTTTTGTGCTCTCACTCGGAAGGACATATGGGAGGGGTGACAATCAACCTCGGATTACA  
AAATTTGTGAAAGATTGACTGGTATTCTTAACTATGTTGCTCCTTTTACGCTATGTGGATACGCTGCTTAAATGCCTTTGTATCATG  
CGTAACTAAACTTGTATTGTCAGCTTATAATGGTTACAATAAAGCAATAGCATCACAATAATTTACAATAAAGCAATTTTTTTCAC  
TGCATTCTAGTTGTGTTTTGTCCAAACTCATCAATGTATCTTATCATGTCTGGAATTGACTCAATGATGTCAATTAGTCTATCAGA  
AGTATCTGGTCTCCCTCCGGGGGACAAGACATCCCTGTTAATATTTAAACAGCAGTGTTCCTCAAACCTGGGTTCTTATATCCCT  
TGCTCTGGTCAACCAGTTCAGGGTTCCGTTCTCCTCACAGGAACGAACTCCCTAAAGAAACAGTGGCAGCCAGTGTAGCCCT  
GGAATTGACTGGATTTTAAAGGCCCCATTGGTATGCTTTTTCCCGTATCCCCCGAGTGTGCGAGCTTCCCGGATCAAGGAGCAG  
CGAGAAGCGTTCAGAGGAAAGCGATCCCGTGCACCTTCCCGTGCCTGGGCTGTCCCGCACGCTGCCGGCTCGGGGATGC  
GGGGGAGCGCCGGACCGGAGCGGAGCCCGGGCGGCTCGCTGCTGCCCTAGCGGGGAGGGACGTAATTACATCCCTG  
GGGGCTTTGGGGGGGGGCTGTCCCTGATATCTATAACAAGAAAATATATATAATAAGTTATCACGTAAGTAGAACATGAAATAA  
CAATATAATTATCGTATGAGTTAAATCTTAAAGTCAAGTAAAAGATAATCATGCGTCAATTTGACTCACCGCGGTGTTATAGTTCA  
AAATCAGTGACACTTACCGAATTGACAAGCACGCTCACGGGAGCTCCAAGCGGCGACTGAGATGTCCTAAATGCACAGGACG  
GATTCGCGCTATTTAGAAAGAGAGCAATATTTCAAGAATGCATGCGTCAATTTTACGCAGACTATCTTTCTAGGGTTAATCTAG  
CTGCATCAGGATCATATCGTCCGGTCTTTTTCCGGCTCAGTCACTGCCCAAGCTGGCGCTATCTGGCATCGGGGAGGAAGAA

GCCCGTGCCCTTTCCCGCGAGGTTGAAGCGGCATGGAAAGAGTTTGCCGAGGATGACTGCTGCTGCATTGACGTTGAGCGAAA  
 ACGCACGTTTACCATGATGATTCGGAAGGTGTGGCCATGCACGCCCTTTAACGGTGAAGTGTTCGTTACAGCCACCTGGGATAC  
 CAGTTCGTCGCGCTTTTCCGGACACAGTTCGGATGGTCAGCCCGAAGCGCATCAGCAACCCGAACAATACCGGCGACAGCC  
 GGAAGTCCCGTGCCGGTGTGCAGATTAATGACAGCGGTGCGGCGCTGGGATATTACGTCAGCGAGGACGGGTATCCTGGCTG  
 GATGCCCGAGAAATGGACATGGATACCCCGTGAGTTACCCGGCGGGCGCGCTTGGCGTAATCATGGTCATAGCTGTTTCCTGT  
 GTGAAATTGTTATCCGCTCACAATCCACACAACATACGAGCCGGAAGCATAAAGTGTAAAGCCTGGGGTGCCTAATGAGTGA  
 CTAATCACATTAATTGCGTTGCGTCACTGCCCGCTTTCCAGTCGGAAACCTGTGCTGCCAGCTGCATTAATGAATCGGCCAA  
 CGCGCGGGGAGAGGCGGTTTGCATTTGGGCGCTCTCCGCTTCCGCTCACTGACTCGCTCGGCTCGGTCGTTCCGGCTGCG  
 GCGAGCGGTATCAGCTCACTCAAAGGCGGTAATACGTTATCCACAGAATCAGGGGATAACGCAGGAAAGAACATGTGAGCAA  
 AGGCCAGCAAAAGGCCAGGAACCGTAAAAAGGCCGCGTGTGCTGGCGTTTTTCCATAGGCTCCGCCCCCTGACGAGCATACA  
 AAAATCGACGCTCAAGTCAGAGGTGGCGAAACCCGACAGGACTATAAAGATACCAGGCGTTTTCCCCCTGGAAGCTCCCTCGTGC  
 GCTCTCCTGTTCCGACCCTGCCGCTTACCGGATACCTGTCCGCTTTCTCCCTCGGGAAGCGTGGCGCTTTCTCATAGCTCAC  
 GCTGATGGTATCTCAGTTCGGTGTAGGTGCTCCGCTCAAGCTGGGCTGTGTGCACGAACCCCGTTACGCCGACCCGCTGC  
 GCCTTATCCGGTAACTATCGTCTTGAGTCCAACCCGGTAAGACACGACTTATCGCCACTGGCAGCAGCCACTGGTAACAGGATT  
 AGCAGAGCGAGGTATGTAGGCGGTGTACAGAGTTCTTGAAGTGGTGGCTAACTACGGCTACACTAGAAGGACAGTATTTGGT  
 ATCTGCGCTCTGCTGAAGCCAGTTACCTTCGGAAAAAGAGTTGGTAGCTCTTGATCCGGCAAACAACCACCGCTGGTAGCGGT  
 GGTTTTTTTGTGCAAGCAGCAGATTACGCGCAGAAAAAAGGATCTCAAGAAGATCCTTTGATCTTTTCTACGGGGTCTGACG  
 CTCAGTGAACGAAAACCTACGTTAAGGGATTTTGGTCATGAGATTATCAAAAAGGATCTTACCTAGATCCTTTAAATTAATAA  
 GAAGTTTTAAATCAATCTAAAGTATATGAGTAAACTTTGGTCTGACAGTTACCAATGCTTAATCAGTGAGGCACCTATCTCAGCG  
 ATCTGTCTATTTTCGTTTATCCATAGTTGCCTGACTCCCGCTCGTGTAGATAACTACGATACGGGAGGGCTTACCATCTGGCCCA  
 GTGCTGCAATGATACCGCGAGACCCACGCTCACCGGCTCCAGATTTATCAGCAATAAACAGCCAGCCGGAAGGGCCGAGCGC  
 AGAAGTGGTCTGCAACTTTATCCGCTCCATCCAGTCTATTAATTGTTGCCGGGAAGCTAGAGTAAGTAGTTCGCCAGTTAATA  
 GTTTGCGCAACGTTGTTGCCATTGCTACAGGCATCGTGGTGTACGCTCGTCTTGGTATGGCTTATTACGCTCCGGTCCCA  
 ACGTAAAGGCGAGTTACATGATCCCCATGTTTGTGCAAAAAAGCGGTTAGCTCCTTCGGTCTCCGATCGTTGTGCAAGTAAG  
 TTGGCCGAGTGTATCACTCATGGTTATGGCAGCACTGCATAATTCTTACTGTATGCCATCCGTAAGATGCTTTTCTGTGAC  
 TGGTGAAGTCAACCAAGTCATTCTGAGAATAGTGTATGCGGGCAGCGAGTTGCTCTTGGCCGCGTCAATACGGGATAATAC  
 CGCGCCACATAGCAGAAGTTTAAAGTGCTCATATTGAAAAACGTTCTTCGGGGCGAAAACTCTCAAGGATCTTACCGCTGTTG  
 AGATCCAGTTCGATGTAACCCACTCGTGCACCCAACTGATCTTCAGCATCTTTACTTTACCAGCGTTTCTGGGTGAGCAAAAA  
 CAGGAAGGCAAAATGCCGCAAAAAAGGAATAAGGGCGACACGGAAATGTTGAATACTCAT

**2.2.12 Vector 65: Pyl tRNA<sub>UCCU(Ev1)</sub> PylRS mCherry-P2A-eGFP(150AGGA)**

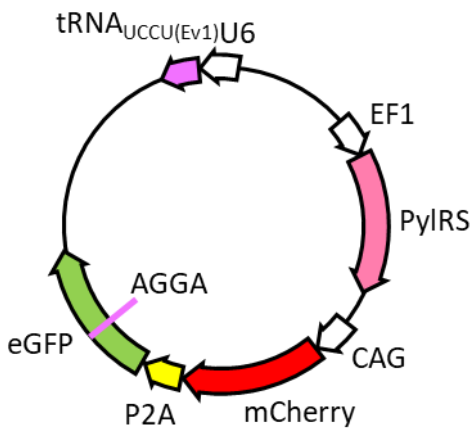

ACTCTTCCCTTTTCAATATTATTGAAGCATTATCAGGGTTATTGTCTCATGAGCGGATACATATTTGAATGTATTTAGAAAAATAA  
 CAAATAGGGGTTCCGCGCACATTTCCCGAAAAGTGCCACCTAAATTTGAAGCGTAAATTTTTGTTAAAATTCGCGTTAAATTTT  
 GTTAAATCAGCTCATTTTTTAAACCAATAGGCCGAAATCGGCAAAATCCCTTATAAATCAAAAGAATAGACCGAGATAGGGTTGAGT  
 GTTGTCCAGTTTGAACAAGAGTCCACTATTAAGAACGTGGACTCCAACGTCAAAGGGCGAAAAACCGTCTATCAGGGCGAT  
 GGCCACTACGTGAACCATCACCTAATCAAGTTTTTTGGGGTTCGAGGTGCCGTAAGCACTAAATCGGAACCCCTAAAGGGAGC  
 CCCCATTAGAGCTTGACGGGGAAAGCCGGCGAACGTGGCGAGAAAGGAAGGGAAAGAAAGCGAAAGGAGCGGGCGCTAGGG  
 CGCTGGCAAGTGTAGCGGTACGCTGCGCGTAACCACCACACCCGCGCTTAATGCGCCGCTACAGGGCGCGTCCCATTCC  
 GCCATTAGGCTGCGCAACTGTTGGGAAGGGCGATCGGTGCGGGCCTTTCGCTATTACGCCAGCTGGCGAAAGGGGGATGT  
 GCTGCAAGGCGATTAAGTTGGGTAACGCCAGGGTTTTCCAGTACGACGTTGTAAACGACGGCCAGTGAGCGCGCTCGTT  
 CATTACGTTTTTGAACCCGTGGAGGACGGGCAGACTCGCGGTGCAAAATGTGTTTTACAGCGTGATGGAGCAGATGAAGATGCT  
 CGACAGCTGCAGAAACCGCAGTATGATTAACCTAGAAAGATAATCATATTGTGACGTACGTTAAAGATAATCATGCGTAAAT  
 GACGATGTGTTTTATCGGCTGTATATCGAGGTTTTATTAATTTGAATAGATATTAAGTTTTATTATTTACACTTACATACTA  
 ATAATAAATCAACAACAATTTATTTATGTTTATTTATTTAATAAATAAATAAATAAATAAATAAATAAATAAATAAATAAATAA  
 TTAGAGGGACAGCCCCCCCCAAAGCCCCAGGGATGTAATTACGTCCCTCCCCGCTAGGGGGCAGCAGCGAGCCGCCCCG  
 GGGCTCCGCTCCGGTCCGGCGCTCCCCCGCATCCCCGAGCCGGCAGCGTGGGGGACAGCCGGGCAGGGGAAGGTGG  
 CACGGGATCGTTTTCTCTGAACGCTTCTCGCTGCTTTGAGCCTGCAGACACCTGGGGGGATACGGGGAAAAGGCCATAAAA  
 CCGCACTGTCCGGAAACCCGGGAATCTAACCCGGCTGAACCTATTAGGAGAGGATTGATCTACATGATCAGGTTCCG  
 GTGTTTCTGCTTTTCCAAAGATATAAAGCCAAGAAATCGAAATCTTTCAAGTTACGGTAAGCATATGATATCCATTTAAAA  
 CATAATTTTAAACTGCAAACCTACCCAAGAAATTTACTTTCTACGTCACGTAATTTTGTACTAATATCTTTGTGTTTACAGTCAA  
 TAATTTCTAATTATCTCTAACAGCCTTGTATCGTATATGCAAAATATGAAGGAATCATGGGAAATAGGCCCTTTCCTGCCAAC  
 GGTTGCGATCGCTCCGGTGCCTGTCAGTGGGAGAGCGCACATCGCCACAGTCCCGGAGAAGTTGGGGGAGGGGTCCGGCA  
 ATTGAACGGGTGCCTAGAGAAGGTGGCGCGGGGTAAACTGGGAAAGTGATGTCGTGACTGGCTCCGCGCTTTTCCCGAGGGT  
 GGGGGAGAACCGTATAAAGTCAGTAGTCGCCGTGAACGTTCTTTTTCGCAACGGGTTTGGCCGAGAACACAGCTGAAGCTT  
 CGAGGGCTCGCATCTCTCTTACGCGCCCGCCGCTACCTGAGGCGCCATCCACGCGGTTGAGTCGCTTCTGCGCGC  
 CTCCCGCTGTGGTGCCTCTGAACTGCGTCCGCGCTAGGTAAGTTAAAGCTCAGGTCGAGACCGGGCTTTGTCCGGCG



CTGCATCAGGATCATATCGTCCGGTCTTTTTCCGGCTCAGTCATCGCCCAAGCTGGCGCTATCTGGGCATCGGGGAGGAAGAA  
 GCCCGTGCCTTTTCCCGCAGAGTTGAAGCGGCATGGAAGAGTTGCCGAGGATGACTGCTGCTGCATTGACGTTGAGCGAAA  
 ACGCACGTTTACCATGATGATTCCGGGAAGGTGTGGCCATGCACGCCTTTAACGGTGAAGTGTTCGTTTCAGGCCACCTGGGATAC  
 CAGTTCGTCGCGGCTTTTCCGGACACAGTCCGGATGGTCAGCCGAAGCGCATCAGCAACCCGAACAATACCGGCGACAGCC  
 GGAAGTGCCTGCGGTTGTGCAGATTAATGACAGCGGTGCGGCGCTGGGATATTACGTCAGCGAGGACGGGTATCCTGGCTG  
 GATGCCGCAGAAATGGACATGGATACCCCGTGAGTTACCCGGCGGGCGCGCTTGGCGTAATCATGGTCATAGCTGTTTCCTGT  
 GTGAAATTGTTATCCGCTACAATCCACACAACATACGAGCCGAAGCATAAAGTGTAAAGCCTGGGGTGCCTAATGAGTGAG  
 CTAACCTCACATTAATTGCGTTGCGTCACTGCCGCTTTCCAGTCGGGAAACCTGTCGTGCCAGCTGCATTAATGAATCGGCCAA  
 CGCGCGGGGAGAGGCGGTTTGCATTTGGGCGCTTCCGCTTCTCGCTCACTGACTCGCTGCGCTCGGTCGTTCCGGCTGCG  
 GCGAGCGGTATCAGCTCACTCAAAGGCGGTAATACGGTTATCCACAGAATCAGGGGATAACGCAGGAAAGAACATGTGAGCAA  
 AGGCCAGCAAAAGGCCAGGAACCGTAAAAAGGCCGCGTTCGCTGGCGTTTTTCCATAGGCTCCGCCCCCTGACGAGCATCACA  
 AAAATCGACGCTCAAGTCAGAGGTGGCGAAACCCGACAGGACTATAAAGATACCAGGCGTTTTCCCCCTGGAAGCTCCCTCGTGC  
 GCTCCTCGTCCGACCCTGCCGTTACCGGATACCTGTCCGCTTTCCTCCCTTCGGGAAGCGTGGCGCTTTCATAGCTCAC  
 GCTGTAGGTATCTCAGTTCGGTGTAGTTCGCTCCAAGCTGGGCTGTGTGCACGAACCCCGTTCAGCCCGACCGCTGC  
 GCCTTATCCGGTAACTATCGTCTTGAGTCCAACCCGTAAGACAGACTTATCGCCACTGGCAGCAGCCACTGGTAACAGGATT  
 AGCAGAGCGAGGTATGTAGGCGGTGCTACAGAGTTCTTGAAGTGGTGGCCTAACTACGGCTACACTAGAAGGACAGTATTTGGT  
 ATCTGCGCTCTGCTGAAGCCAGTTACCTTCGGAAAAAGAGTTGGTAGCTCTTGATCCGGCAAAACAAACCACCGCTGGTAGCGGT  
 GGTTTTTTTGTGCAAGCAGCAGATTACGCGCAGAAAAAAGGATCTCAAGAAGATCCTTTGATCTTTTACGGGTCTGACG  
 CTCAGTGAACGAAAACACGTTAAGGGATTTTGGTCATGAGATTATCAAAAAGGATCTTACCTAGATCCTTTTAAATTAATAA  
 GAAGTTTTAAATCAATCTAAAGTATATATGAGTAAACTTGGTCTGACAGTTACCAATGCTTAATCAGTGAGGCACCTATCTCAGCG  
 ATCTGTCTATTTTCGTTTCATCCATAGTTGCCTGACTCCCGCTCGTGTAGATAACTACGATACGGGAGGGCTTACCATCTGGCCCA  
 GTGCTGCAATGATACCGCGAGACCCACGCTCACCGGCTCCAGATTTATCAGCAATAAACAGCCAGCCGGAAGGGCCGAGCGC  
 AGAAGTGGTCTGCAACTTTATCCGCTCCATCCAGTCTATTAATTGTTGCCGGAAGCTAGAGTAAGTAGTTCGCCAGTTAATA  
 GTTTCGCAACGTTGTCATTGCTACAGGCATCGTGGTGCACGCTCGTCTTTGGTATGGCTTACCTCAGCTCCGTTCCCA  
 ACGATCAAGGCGAGTTACATGATCCCCATGTTGTGCAAAAAAGCGTTAGCTCCTTCGGTCTCCGATCGTTGTCAGAAGTAAG  
 TTGGCCGAGTGTATCACTCATGGTTATGGCAGCACTGCATAATTCTTACTGTATGCCATCCGTAAGATGCTTTTCTGTGAC  
 TGGTGTAGTACTCAACCAAGTCATTCTGAGAATAGTGTATGCGGCGACCGAGTTGCTCTTGGCCGCGTCAATACGGGATAATAC  
 CGCGCCACATAGCAGAAGTAAAAAGTGTCTCATCATTGGAAAACGTTCTTCGGGGGCGAAAACCTCAAGGATCTTACCGCTGTTG  
 AGATCCAGTTCGATGTAACCCACTCGTGCACCAACTGATCTTCAGCATCTTTTACTTTTACCAGCGTTTCTGGGTGAGCAAAAA  
 CAGGAAGGCAAAATGCCGCAAAAAAGGGAATAAGGGCGACACGAAATGTTGAATACTCAT

**2.2.13 Vector 66: Pyl tRNA<sub>UCCU(Ev2)</sub> PylRS mCherry-P2A-eGFP(150AGGA)**

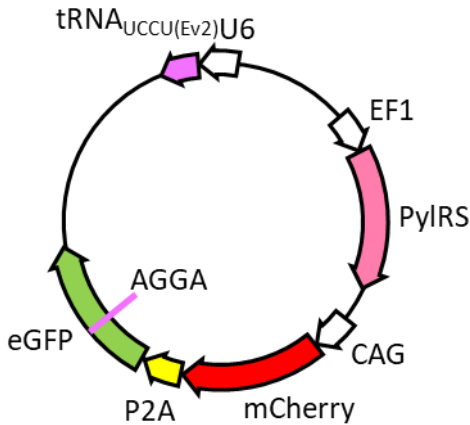

ACTCTTCTTTTTCAATATTATTGAAGCATTATCAGGGTTATTGTCTCATGAGCGGATACATATTTGAATGTATTGAAAAATAAA  
 CAAATAGGGGTTCCGCGCACATTTCCCGAAAAGTGCCACCTAAATTGTAAGCGTTAATATTTTGTAAAAATTCGCTTAAATTTTT  
 GTTAAATCAGCTCATTTTTTAACCAATAGGCCGAAATCGGCAAAATCCCTTATAAATCAAAAGAATAGACCGAGATAGGGTTGAGT  
 GTTGTCCAGTTTGAACAAGAGTCCACTATTAAGAACGTGGACTCCAACGTCAAAGGGCGAAAAACCGTCTATCAGGGCGAT  
 GGCCCACTAGCTGAACCATCACCTAATCAAGTTTTTGGGGTCGAGGTGCCGTAAGCACTAAATCGGAACCCATAAGGGGAGC  
 CCCCATTAGAGCTTGACGGGAAAGCCGGCAACGTGGCGAGAAAGGAAGGAAAGCAAGGAGCGGGCGTAGGG  
 CGCTGGCAAGTGTAGCGGTACGCTGCGCGTAACCACCACACCCGCCGCGCTTAATGCGCCGCTACAGGGCGCGTCCCATT  
 GCCATTACGGTGCGCAACTGTTGGGAAGGGCGATCGGTGCGGGCCTCTTCGCTATTACGCCAGCTGGCGAAAGGGGGATGT  
 GCTGCAAGGCGATTAAGTTGGGTAACGCCAGGGTTTTCCAGTACGACGTTGTA AACGACGGCCAGTGAGCGCGCTCGTT  
 CATTACGTTTTTGAACCCGTGGAGGACGGGACAGCTCGCGGTCAAAATGTGTTTTACAGCGTGATGGAGCAGATGAAGATGCT  
 CGACCGCTGCAGAACCGCAGCTAGATTAACCTAGAAAGATAATCATATTGTGACGTACGTTAAAGATAATCATGCGTAAAAAT  
 GACGCATGTGTTTTATCGTCTGTATATCGAGGTTTTATTAATTTGAATAGATATTAAGTTTTATTATTTACACTTACATACTA  
 ATAATAAATTCAACAACAATTTATTTATGTTATTTATTTATTA AAAAAAACA AAAA ACTCAAAATTTCTTCTATAAAGTAACAAACTT  
 TTATGAGGGACAGCCCCCCCCAAAGCCCCAGGGATGTAATTACGTCCCTCCCCCGCTAGGGGGCAGCAGCGAGCCGCCCG  
 GGGCTCCGCTCCGTTCCGCGCTCCCCCGCATCCCCGAGCCGGCAGCGTGCGGGGACAGCCCGGCCAGGGGAAGGTGG  
 CACGGGATCGTTTTCTGACCGCTTCTCGTCTTTGAGCGTGCAGACCTGGGGGGATACGGGGAAAAGGCCTAAAAA  
 CCGCACTTGTCT**CGGAACCCCGGAATCTAACCCGGTGAAGCGGATAGGAAGCCCTTCGATCTACATGATCAGGTTCCG**  
 GTGTTTC**GTCTTTCCACAAGATATATAAAGCCAAGAAATCGAAATACTTTCAAGTTACGGTAAGCATATGATAGTCCATTTTAAAA**  
**CATAATTTTAAACTGCAAACCTACCAAGAAATTTACTTTCTACGTCACGTATTTTGTACTAATATCTTTGTGTTTACAGTCAAAT**  
**TAATTCATAATTCTCTCTAACACGCTTGATCGTATATGCAAAATATGAAGGAATCATGGGAAATAGGCCCTC**TTCTGCCAACC  
 GGTTGCGATCGCTCCGGTGCCCGTCAGTGGGAGAGCGCACATCGCCACAGTCCCGGAGAAAGTTGGGGGGAGGGGTCCGGCA  
 ATTGAACGGTGCCTAGAGAAGGTGGCGGGGTAACCTGGGAAAGTATGTCGTGTACTGGCTCCGCTTTTTCCCGAGGGT  
 GGGGGAGAACCCTATATAAGTGCAGTAGTCCCGTGAACGTTCTTTTTTCGCAACGGGTTTTGCCCGCCAGAACACAGCTGAAGCTT  
 CGAGGGGCTCGCATCTCTCTTACGCGCCCGCCCTACCTGAGGCCGCCATCCACGCCGTTGAGTCGCGTCTGCGC



CTCCCGCTGTGGTGCCTCTGAAGTGCCTCCGCGTCTAGTAAAGTTAAAGCTCAGGTCGAGACCGGGCCTTTGTCGGGG  
CTCCCTTGAGCCTACCTAGACTCAGCCGGCTCTCCACGCTTTGCTGACCCTGCTTGCTCAACTCTACGCTTTGTTTCGTTTT  
CTGTTCTGCGCGTTACAGATCCAAGCTGTGACCGGCGCCTACTCTACAGATAGCGTTTAAACTTACGCTTGCCACC**ATGGCTA**  
**GCGACTACAAGGACGACGACGACAAGGACAAGAAGCCCTGAACACCCTGATCAGCGCCACAGGACTGTGGATGCCAGAA**  
**CGGCACCATCCACAAGATCAAGCACCACGAGGTGTCCCGGTCAAATCTACATCGAGATGGCCTGCGGCGATCACCTGGT**  
**CGTCAACAACAGCAGAAGCAGCCGGACAGCCAGAGCCCTGCGGCACCACAAGTACAGAAAGACCTGCAAGCGGTGCAGAG**  
**TGTCCGACGAGGACTGAACAAGTTCCTGACCAAGGCAACGAGGACAGCCAGCCGTGAAAGTGAAGTGGTGTCCGCC**  
**CCACCCGACCAAGAAAGCCATGCCCAAGAGCGTGGCCAGAGCCCAAGCCCTGGAAAACACCGAAGCCGCTCAGGCC**  
**CAGCCCAGCGGCAGCAAGTTCAGCCCCGCCATCCCCGTGTCTACCCAGGAAAGCGTCAGCGTCCCCGCCAGCGTGTCCACC**  
**AGCATCTCTAGCATCTCAACCGGCGCCACAGCTTCTGCCCTGGTCAAGGGCAACACCAACCCCATCACAGCATGTCTGCC**  
**CTGTGCAAGCCTCTGCCCCAGCCCTGACCAAGTCCCAGACCGACCGGTGGAAGTGTCTCTGAAACCCCAAGGACGAGATCA**  
**GCCTGAACAGCGGCAAGCCCTCCGGGAGCTGGAAGAGGAGCTGTGAGCCGCGGGAAGAAGGACCTCCAGCAAATCTACG**  
**CCGAGAACCGGGAAGTACCTGGGCAAGCTGGAAGAGAGATACCCCGTTCTTCGTGGAGCCGGGCTTCTGGAATCA**  
**AGAGCCCATCTGATCCCCCTGGAGTACATCGAGCGGATGGGCATCGACAACGACACCGAGCTGAGCAAGCAGATTTCCG**  
**GGTGACAAGAACTTCTGCTGCGGCCATGTGGCCCCAACCTGTACAACCTGCGGAAACTGGATCGCGCTCTGCC**  
**GACCCCATCAAGATTTTCGAGATCGGCCCTGCTACCGGAAAGAGAGCGACGGCAAAGAGCACCTGGAAGAGTTACAATGC**  
**TGAATTTTCCAGATGGGCAGCGGCTGCACAGAGAGAACCTGGAATCCATCATCACCGACTTTCTGAACCACTGGGGAT**  
**CGACTTCAAGATCGTGGGACAGCTGCATGGTGTACGGCAGACCCCTGGACGTGATGCACGGGACCTGGAATGTCTAG**  
**CGCGTCTGGGACCCATCCCTCTGACCCGGAGTGGGGCATCGATAAGCCCTGGATCGGAGCCGGCTTCCGCTGGAACG**  
**GCTGTGAAAGTCAAGCAGACTTTAAGAACATCAAGCGGGCTGCCAGAAGCGAGAGCTACTACAACGGCATCAGCACCAA**  
**CCTGTGATGATAAGGATCCACTAGTCCAGTGTGGTGAATTGACATTGATTATTGACTAGTTATTAATAGTAATCAATTACGGGGT**  
**CATTAGTTCATAGCCCATATATGGAGTTCGCGTTACATAACTTACGGTAAATGGCCCGCCTGGCTGACCGCCCAACGACCC**  
**GCCATTGACGTCAATAATGACGTATGTTCCCATAGTAACGCCAATAGGGACTTCCATTGACGTCAATGGTGGAGATTTACG**  
**GTAACCTGCCACTTGGCAGTACATCAAGTGTATCATAGCAAGTACGCCCTTATTGACGTCAATGACGTTAAATGGCCCGC**  
**TGGCATTATGCCAGTACATGACCTTATGGGACTTTCCTACTTGGCAGTACATCTACGTATTAGTCATCGCTATTACCATGGT**  
**GGTGAGCCCCAGTTCTGCTTCACTCTCCCCATCTCCCCCCCCCTCCCCACCCCAATTTGTATTTATTTATTTTAAATATTTG**  
**TGCAGCGATGGGGGCGGGGGGGGGGGGGGGGGGGGGGGGGGGGGGGGGGGGGGGGGGGGGGGGGGGGGGGGGGGGGGG**  
**GGAGAGGTGCGGCGGCAGCCAATCAGAGCGGCGCGCTCCGAAAGTTTCTTTTATGGCGAGGCGGGCGGGCGGGCGGGCG**  
**ATAAAAAGCGAAGCGCGCGCGGGGGGGAGTCTGCTGCTTCCCTTCCCGCCCTGCCCCGCTCCCGCCTCCGCGCCGCTCG**  
**CGCCCCGGCTCTGACTGACCGCTTACTCCACAGGTGAGCGGGCGGGACCGCCCTTCTCCTCCGGGCTGTAATTAGCGCTT**  
**GTTTAAATGACGGCTCGTTTCTTTCTGTGGCTGCGTAAAGCCTTAAAGGGCTCCGGGAGGGCCCTTTGTGCGGGGGGGAGCG**  
**GCTCGGGGGGTGCGTGCCTGTGTGTGTGCGTGGGAGCGCCGCTGCGGCCCGCGCTGCCCGCGGGCTGTGAGCGCTGCG**  
**GGCGCGGGCGGGGGCTTTGTGCGCTCCGCTGTGCGGAGGGAGCGCGCCGGGGGGGGGGGGGGGGGGGGGGGGGGGGGG**  
**GCTCGGAGGGAAACAAGGCTGCTGCGGGTGTGCTGCTGGGGGTGAGCAGGGGTGTGGCGCGGGCTGCGGGCGGGCTG**  
**TAACCCCCCTCGACCCCTCCCGAGTTGCTGAGCACGGCCCGCTTCCGGTGGGGCTCCGTACGGGGCGTGGCG**  
**GGGGCTCGCGTGGGGGGGGGGGGTGGCGGCAGGTGGGGTGGCGGGCGGGGGGGGGGGGGGGGGGGGGGGGGGGGGGG**  
**CTCGGGGGAGGGGGCGGGGGGGGGGGGGGGGGGGGGGGGGGGGGGGGGGGGGGGGGGGGGGGGGGGGGGGGGGGGGGG**  
**ATCGTGCAGAGGGGGCGAGGGACTTCTTTTCCCAAATCTGTGCGGAGGCCAAATCTGGGAGGCGCCGCGCACCCCTCTA**  
**GCGGGCGGGGGCAAGCGGTGCGGCGCGGAGGAAATGGCGGGAGGGCCCTTCTGCTGCGCCGCGCCCGCT**  
**CCCCTTCCCTCCAGCTCGGGCTGCGCGGGGGAGCGGTGCTTCCGGGGGGAGCGGGGGGGGGGGGGGGGGGGGGGGGGGG**  
**TTCTGGCGTGTGACCGGGCTCTAGAGCCTCTGCTAACCATGTTTATGCTTCTTTTCTTCTTCTTCTTCTTCTTCTTCTTCT**  
**TGTTATTGTGCTGTCTCATTTTTGGCAAAGAATTCCGCCACC**ATGGTGAGCAAGGGCGAGGAGGATAACATGGCCATCATCA****  
**AGGAGTTTATGCGCTTCAAGGTGCACATGGAGGGTCCGTGAACGGCCACGAGTTCGAGATCGAGGGCGAGGGCGAGGGCC**  
**GCCCTACGAGGGCACCCAGCCGCAAGTGAAGGTGACCAAGGTGGCCCCCTGCCCTTCCCTGGGACATCCTGTCCC**  
**CTCAGTTATGACGGCTCAGGCTCAGGCTGAAAGTACCCCGGACTACTTGAAGCTGTCTTCCCTCCCGAGGG**  
**CTTCAAGTGGGAGCGCTGATGAACTTCGAGGACGGCGGGTGGTACCCTGACCCAGGACTCCTCCCTGCAGGACGGCGA**  
**GTTTATCTACAAGGTGAAGCTGCGGGCACCAACTTCCCCTCCGACGGCCCCGTAAATGCAGAAGAAGACCATGGGCTGGGA**  
**GGCCTCTCCGAGCGGATGTACCCGAGGACGGCGCCCTGAAGGGCGAGATCAAGCAGAGGCTGAAGCTGAAGGACGGCG**  
**GCCACTACGACGCTGAGTCAAGACCACCTACAAGGCCAAGAAGCCCTGTCAGCTGCCCGGCGCTACAACCTCAACATCA**  
**AGTTGGACACTCCCAACAGGACTACACCTGTGGAACAGTACGAACCGCCGAGGGCCGACCTCCACCTCCACCGCG**  
**GCATGGACGAGCTGTACGCGTCTGGAGGCGCCACCAATTTAGCGCTGTGAAACAGGCTGGCGACGTGGAAGAGAACCCTG**  
**GACCTGGACAAAAGTCCGTGAGCAAGGGCGAGGAGCTTTCACCGGGGTGGTGGCCATCCTGGTTCGAGCTGGACGGCGACG**  
**TAAACGGCCACAAGTTCAGCGTGTCCGGCGAGGGCGAGGGCGATGCCACCTACGGCAAGCTGACCTGAAGTTCATCTGCA**  
**CCACCGGCAAGCTGCCCGTGGCCCTGGCCACCCTCGTACCACCTGACCTACGGCGTGCAGTGTTCAGCCGCTACCCCGA**  
**CCACATGAAGCAGCAGACTTCTTCAAGTCCGCGATGCCGAGGCTACGTCAGGAGCGCACCATCTTCTTCAAGGACGAC**  
**GGCAACTACAAGACCCGCGCCGAGGTGAAGTTCGAGGGCGACCCCTGGTGAACCGCATCGAGCTGAAGGGCATCGACTTC**  
**AAGGAGGACGGCAACATCCTGGGGCACAAGCTGGAGTACAACCTACAACAGCCACAGGAGTCTATATCATGGCCGACAAGCA**  
**GAAGAACGGCATCAAGGTGAACCTCAAGATCCGCCACAACATCGAGGACGGCAGCGTGCAGCTGCGCGACCACTACCAGCA**  
**GAACACCCCATCGGCGACGGCCCGTGTGCTGCCGACAACCACTACCTGAGCAGCCAGTCCGCGCTGAGCAAAGACCC**  
**CAACGAGAAGCGGATCACATGCTCTGGAGTTCGTGACCGCCGCGGGATCACTCTCGCATGGACGAGCTGTACA**  
**GTAAGAATTCACCTCAGGTGCAGGCTGCCTATCAGAAGGTGGTGGCTGGTGTGGCCAATGCCCTGGCTCACAAATACCACTG**  
**AGATCTTTTTCCCTCTGCCAAAATATGGGGACATCATGAAGCCCTTGGATCTGACTTCTGGCTAATAAAGGAAATTTATTT**  
**TCATTGCAATAGTGTGTTGGAATTTTTGTGTCTCTCACTCGGAAGGACATATGGGAGGGTGCACAATCAACCTCTGGATTACA**  
**AAATTTGTGAAAGATTGACTGGTATTCTTAACTATGTTGCTCCTTTACGCTATGTGGATACGCTGCTTAAATGCCTTTGTATCATG**  
**CGTTAACTAACTTGTATTTGAGCTTATAATGGTTACAATAAAGCAATAGCATCACAAATTTACAATAAAGCATTTTTTTTAC**  
**TGCATTTAGTGTGGTTTGTCCAAACTCATATGATCTTATCATGTCTGAAATGACTCAAATGATGCAATAGTCTATCATCAGA**  
**AGCTATCTGGTCCCTTCCGGGGACAAGACATCCCTGTTAATATTTAAACGAGTGTTCCAAACGAGTGGTTATATCCCT**  
**TGCTCTGGTCAACCAGTTGCAGGGTTTCTGTCTCACAGGAACGAAGTCCCTAAAGAAACAGTGGCAGCCAGGTTTAGCCCC**  
**GGAATTGACTGGATTCCTTTTTAGGGCCATTGGTATGGCTTTTTCCCCGATCCCCCAGGTGTCTGCAGGCTCAAAGAGCAG**  
**CGAGAAGCGTTACAGAGGAAAGCGATCCCGTGCACCTTCCCGTGCCTCCCGGGCTGTCCCGCAGCTGCCGGCTCGGGGATGC**  
**GGGGGGAGCGCCGACCGGAGCGGAGCCCCGGGCGCTCGCTGCCCTAGCGGGGGAGGGGACGTAATTACATCCCTG**  
**GGGGCTTTGGGGGGGGTGTCCCTGATATCTATAACAAGAAATATATATAATAAAGTTATACGTAAGTGAACATGAAATAA**  
**CAATAAATATCGTATGAGTTAAATCTTAAAAGTACGTAAGATAATCATGCGTCAATTTGACTCACGCGGTGTTATAGTTCA**  
**AAATCAGTGACACTTACCGCATTGACAAGCACGCTCACGGGAGCTCCAAGCGGCGACTGAGATGCTCTAAATGCACAGCGACG**

GATTCGCGCTATTTAGAAAAGAGAGCAATATTTCAAGAATGCATGCGTCAATTTTACGCAGACTATCTTTCTAGGGTTAATCTAG  
 CTGCATCAGGATCATATCGTCGGGTCTTTTTCCGGCTCAGTCATCGCCCAAGCTGGCGCTATCTGGGCATCGGGGAGGAAGAA  
 GCCCCGTGCTTTTTCCCGCGAGGTTGAAGCGGCATGGAAAGAGTTTGCCGAGGATGACTGCTGCTGCATTGACGTTGAGCGAAA  
 ACGCACGTTTACCATGATGATTTCGGGAAGGTGTGGCCATGCACGCCTTTAACGGTGAAGTGTTCGTTTCAGGCCACCTGGGATAC  
 CAGTTCGTGCGGGCTTTTTCCGGACACAGTTCGGGATGGTCAGCCCGAAGCGCATCAGCAACCCGAACAATACCGGCGACAGCC  
 GGAAGTCCCGTGCCGGTGTGCAGATTAATGACAGCGGTGCGGCGCTGGGATATTACGTCAGCGAGGACGGGTATCCTGGCTG  
 GATGCCGCAGAAATGGACATGGATACCCCGTGAAGTACCCGGCGGGCGCGCTTGGCGTAATCATGGTCATAGCTGTTTCTGT  
 GTGAAATTTGTTATCCGCTCACAATCCACACAACATACGAGCCGGAAGCATAAAAGTGTAAGCCTGGGGTGCCTAATGAGTGAG  
 CTAACTCACATTAATTGCGTTGCGCTCACTGCCCGCTTTCCAGTCGGGAAACCTGTGCTGCCAGCTGCATTAATGAATCGGCCAA  
 CGCGCGGGGAGAGGGGTTTTCGCTATTGGGCGCTCTTCCGCTTCTCGCTCACTGACTCGCTGCGCTCGGTCGTTCCGGCTGCG  
 GCGAGCGGTATCAGCTCACTCAAAGGCGGTAATACGGTTATCCACAGAATCAGGGGATAACGCAGGAAAGAACATGTGAGCAAA  
 AGGCCAGCAAAAGGCCAGGAACCGTAAAAAGGCCGCGTTGCTGGCGTTTTTCCATAGGCTCCGCCCCCTGACGAGCATCACA  
 AAAATCGACGCTCAAGTCAGAGGTGGCGAAACCCGACAGGACTATAAAGATACCAGGCGTTTTCCCCCTGGAAGCTCCCTCGTGC  
 GCTCTCCTGTTCCGACCCTGCCGCTTACCGGATACCTGTCCGCTTTCTCCCTTCGGGAAGCGTGGCGCTTTCTCATAGCTCAC  
 GCTGTAGGTATCTCAGTTCGGTGTAGGTCGTTCCGCTCCAAGCTGGGCTGTGTGCACGAACCCCGTTTCAGCCCGACCGCTGC  
 GCCTTATCCGGTAACTATCGTCTTGAAGTCCAACCCGTAAGACACGACTTATCGCCACTGGCAGCAGCCACTGGTAACAGGATT  
 AGCAGAGCGAGGTATGATAGGCGGTGCTACAGAGTTCCTGAAGTGGTGGCCTAACTACGGCTACACTAGAAGGACAGTATTTGGT  
 ATCTGCGCTCTGTGAAGCCAGTTACCTTCGAAAAAGAGTTGGTAGCTCTTATGATCCGGCAAACAACCACCGCTGGTAGCGGT  
 GGTTTTTTTTGTTGCAAGCAGCAGATTACGCGCAGAAAAAAGGATCTCAAGAAGATCCTTTGATCTTTTACGGGGTCTGACG  
 CTCAGTGGAAACGAAAACCTCACGTTAAGGGATTTTGGTCATGAGATTATCAAAAAGGATCTTCACCTAGATCCTTTTAAATAAAAAT  
 GAAGTTTTAAATCAATCTAAAGTATATGAGTAAACTTGGTCTGACAGTTACCAATGCTTAATCAGTGAGGCACCTATCTCAGCG  
 ATCTGTCTATTTTCGTTTCATCCATAGTTGCCTGACTCCCGCTCGTGTAGATAACTACGATACGGGAGGGCTTACCATCTGGCCCCA  
 GTGCTGCAATGATACCGCGAGACCCACGCTCACCAGGCTCCAGATTTATCAGCAATAAACCAGCCAGCCGGAAGGGCCGAGCGC  
 AGAAGTGGTCTGCAACTTTATCCGCTCCAATCCAGTCTATTAATTTGGCCGGAAGCTAGAGTAAGTAGTTCGCCAGTTAATA  
 GTTTGGCAACGTTGTTGCCATTGCTACAGGCATCGTGGTGTACGCTCGTCTTTGGTATGGCTTCATTACAGCTCCGGTTCCCA  
 ACGATCAAGGCGAGTTACATGATCCCCATGTTGTGCAAAAAAGCGTTAGCTCCTTCGGTCTCCGATCGTTGTCAGAAGTAAG  
 TTGGCCGAGTGTATCACTCATGTTATGGCAGCACTGCATAATTCTTACTGTATGCCATCCGTAAGATGCTTTTTCTGTGAC  
 TGGTGAAGTCAACCAAGTCACTTCTGAGAATAGTGTATGCGGGCAGCCGAGTTGCTCTTGGCCGCGTCAATACGGGATAATAC  
 CGCGCCACATAGCAGAACCTTAAAAAGTCTCATCATTGGAAAACGTTCTTCGGGGCGAAAACCTCAAGGATCTTACCGCTGTTG  
 AGATCCAGTTCGATGTAACCCACTCGTGCAACCCAACTGATCTTCAGCATCTTTTACTTTTACCAGCGTTTTCTGGGTGAGCAAAAA  
 CAGGAAGGCAAAATGCCGCAAAAAAGGGAATAAGGGCGACACGAAATGTTGAATACTCAT

2.2.14 Vector 67: Pyl tRNA<sub>ACUA</sub> PylRS mCherry-P2A-eGFP(150TAGT)

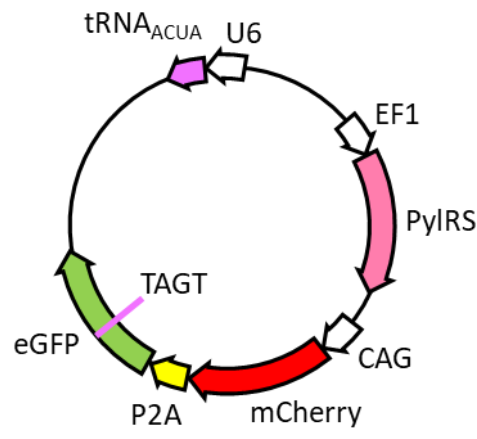

ACTCTTCTTTTTCAATATTATTGAAGCATTATCAGGGTTATTGTCTCATGAGCGGATACATATTTGAATGTATTTAGAAAAATAA  
 CAAATAGGGGTTCCGCGCACATTTCCCGGAAAAGTGCCACCTAAATGTAAGCGTAAATATTTGTTAAAATTCGCGTTAAATTTTT  
 GTTAAATCAGCTCATTTTTTAAACCAATAGGCCGAAATCGGCAAAATCCCTTATAAATCAAAAAGAAATAGACCGAGATAGGGTTGAGT  
 GTTGTCCAGTTTGAACAAGAGTCCACTATTAAGAACGTGGACTCCAACGTCAAAGGGCGGAAAAACCGTCTATCAGGGCGAT  
 GGCCCACTACGTGAACCATCACCTAATCAAGTTTTTTGGGTGAGGTGCCGTAAAGCACTAAATCGGAACCCCTAAAGGGAGC  
 CCCCATTAGAGCTTGACGGGGAAAGCCGCGCAACGTGGCGAGAAAGGAAGGGAAGAAAGCGAAAAGGAGCGGGCGCTAGGG  
 CGCTGGCAAGTGTAGCGGTACGCTGCGGTAACCACCACACCCGCGCGCTTAATGCGCCGCTACAGGGCGCGTCCCATTC  
 GCCATTCAGGCTGCGCAACTGTTGGGAAGGGCGATCGGTGCGGGCCTCTTCGCTATTACGCCAGCTGGCGAAAGGGGGATGT  
 GCTGCAAGGCGATTAAGTTGGTAACGCCAGGGTTTTCCAGTACGACGTTGTAAAACGACGGCCAGTGAGCGCGCCTCGTT  
 CATTACGTTTTTGAACCCGTGGAGGACGGGACAGCTCGCGGTGCAAAATGTGTTTTACAGCTGATGGAGCAGATGAAGATGCT  
 CGACACGCTGCAGAAACACGCACTAGATTAACCCTAGAAAAGATAATCATATTGTGACGTACGTTAAAGATAATCATGCGTAAAAT  
 GACGCATGTGTTTTATCGGTCTGTATATCGAGGTTATTTAATTTGAATAGATATTAAGTTTTATTATTTACACTTACATACTA  
 ATAATAAATTAACAAAACAATTTATTTATGTTATTTATTTAATAAAAAAACA AAAA ACTCAAAATTTCTTCTATAAAGTAACAAAACCT  
 TTATGAGGGACAGCCCCCCCCCAAAGCCCCAGGGATGTAATTACGTCCCTCCCCCGCTAGGGGGCAGCAGCGAGCCGCCCG  
 GGGCTCCGCTCCGGTCCCGCGCTCCCCCGCATCCCCGAGCCGGCAGCGTGCGGGGACAGCCCGGGCACGGGGAAGGTGG  
 CACGGGATCGCTTCTCTGAACGCTTCTCGTGTCTTTGAGCCTGCAGACACCTGGGGGATACGGGGAAAAGCCCTAAAAA  
 CCGCACTTGTCCGAAACCCCGGAACTAACCCGGCTGAACGGATTAGTAGTCCATTTCGATCTACATGATCAGGTTTCCGG  
 TGTTCGTCCTTTCCACAAGATATATAAAGCCAAGAAATCGAAACTTTCAAGTTACGGTAAGCATATGATAGTCCATTTTAAAC  
 ATAATTTTAAAAGTCAAACCTACCCAAGAAATTAATCTTTCTACGTCAGCTATTTTGTACTAATATCTTTGTGTTTACAGTCAAAT  
 AATTCTAATTAATCTCTTAACAGCCTTGTATCGTATGCAATATGAAAGATCATGGGAAATAGGCCCTTTCCTGCCAACCCG  
 GTTGCATCGCTCCGGTCCCGTCAGTGGGCAGAGCCACATCGCCACAGTCCCGGAGAAGTTGGGGGAGGGGTCCGCCAA  
 TTGAACGGGTGCCTAGAGAAGGTGGCGCGGGTAAACTGGGAAAGTGATGTCGTGTACTGGCTCCGCTTTTTCCCGAGGGTG  
 GGGGAGAACCCTATATAAGTGCAGTAGTCGCCGTGAACGTTCTTTTTCGCAACGGGTTTCCCGCCAGAACACAGCTGAAGCTT

GAGGGGCTCGCATCTCTCCTTACGCGCCCCGCCCTACCTGAGGCCGCCATCCACGCCGTTGAGTCGCGTTCTGCCGCT  
CCCCCTGTGGTGCCTCCTGAAGTGCCTCCGCTTAGGTAAGTTTAAAGCTCAGGTCGAGACCGGGCTTTGTCGGCGCT  
CCCTTGAGCCTACCTAGACTCAGCCGGCTCTCCACGCTTTGCCGACCTGCTTGTCAACTCTACGCTTTTGTTCGTTTTCT  
GTTCTGCGCGTTACAGATCCAAGCTGTGACCGGCGCCTACTCTACAGATAGCGTTTAAACTTACGCTTGCCACC**ATGGCTAGC**  
**GACTACAAGGACGACGACGACAAGGACAAGAAGCCCCCTGAACACCCTGATCAGCGCCACAGGACTGTGGATGTCCAGAACC**  
**GGCACCATCCACAAGATCAAGCACCACGAGGTGTCCCGGTCCAAAATCTACATCGAGATGGCCTGCGGGCATCACCTGGTGTG**  
**TCAACAACAGCAGAAGCAGCCGACGACGACCCCTGCGCACCACAAGTACAGAAAGACCTGCAAGCGGTGACAGTGT**  
**CCGACGAGGACCTGAACAAGTTCTGACCAAGGCCAACGAGGACAGCCAGCGTGAAGTGAAGTGGTGTCCGCCCCCA**  
**CCCGGACCAAGAAAGCCATGCCAAGAGCGTGGCCAGAGCCCCAAGCCCCTGGAAAACACCGAAGCCGCTCAGGCCAG**  
**CCCAGCGGCAGCAAGTTCAGCCCCGCCATCCCCGTGTCTACCCAGGAAAGCGTCAGCGTCCCCGCCAGCGTGTCCACCAGC**  
**ATCTCTAGCATCTCAACCGGCGCCACAGCTTCTGCCCTGGTCAAGGGCAACACCAACCCCATCCACAGCATGTCTGCCCTGT**  
**GCAAGCCTCTGCCCCAGCCCTGACCAAGTCCCAGACCGACCGGCTGGAAGTGTCTGACCCCAAGCCAGGACGAGATCAGCT**  
**GAAACGGCAAGCCCTTCCGGAGCTGGAAGAGCGACTGCTGAGCCGGGAAGAAGGACCTCCAGCAAATCTACGCCG**  
**AGGAACGGGAGAACTACCTGGGCAAGCTGGAAGAGAGATCACCCGTTCTTCTGGACCGGGGCTTCTGGAAATCAAGA**  
**GCCCCATCCTGATCCCCCTGGAGTACATCGAGCGGATGGGCATCGACAACGACACCGAGCTGAGCAAGCAGATTTTCCGGT**  
**GGACAAGAATTCTGCCTGCGGCCATGCTGGCCCCAACCTGTACAACCTGCGGAAACTGGATCGCGCTCTGCCCGAC**  
**CCCATAAGATTTTCGAGATCGGCCCTGTACCCGAAAGAGAGCAGCGCAAGAGCACCTGGAAGAGTTTACAATGTGA**  
**ACTTTGGCAGATGGCAGCGGCTGCACAGAGACAACCTGGAATCCATCATCCGACTTTCTGAACCACTGGGATCGA**  
**CTTCAAGATCGTGGCGCAGACTGCATGGTGTACGGCGACACCCTGGACGTGATGCACGGCGACCTGGAACCTGTCTAGCGC**  
**CGTCTGGGACCCATCCCTCTGGACCGGGAGTGGGGCATCGATAAGCCCTGGATCGGAGCCGGCTTCCGGCTGGAACGGCT**  
**GCTGAAAGTCAAGCAGCACTTAAAGAACATCAAGCGGGCTGCCAGAAGCGAGAGCTACTACAACGGCATCAGCACCAACT**  
**GTGATGATAAGGATCCACTAGTCCAGTGTGGTGAATTGACATTGATTATTGACTAGTTATTAATAGTAATCAATTACGGGGTCA**  
**TAGTTTCATGCCATATATGGAGTTCGCGTTACATAACTTACGGTAAATGGCCCGCTGGCTGACCGCCCAACGACCCCGCC**  
**CATTGACGTCATAATGACGTATGTTCCCATAGTAACGCCAATAGGGACTTCCATTGACGTCATGGTGGAGTATTTACGGTA**  
**AACTGCCCACTTGGCAGTACATCAAGTGTATCATATGCCAAGTACGCCCCCTATTGACGTCATGACGGTAAATGGCCCGCCTG**  
**GCATTATGCCAGTACATGACCTTATGGGACTTTCCTACTTGGCAGTACATCTACGTATTAGTCATCGCTATTACCATGGTTCGAGG**  
**TGAGCCCCACGTTCTGCTTACTCTCCCCATCTCCCCCCCCCTCCCCACCCCAATTTTGTATTTATTTATTTTAAATTATTTGTG**  
**CAGCGATGGGGGCGGGGGGGGGGGGGGGGGGGCGCGCCAGCGGGGGGGGGGGGGGGGGGGGGGGGGGGGGGGGGGGGGGGGG**  
**GAGAGGTGCGGGCAGCCAATCAGAGCGGGCGCTCCGAAAGTTTCTTTTATGGCGAGGGCGGGCGGGCGGGCGGGGGGGGGGG**  
**AAAAAGCGAAGCGCGCGGGGGGGGGGGGGGGGGGGGGGGGGGGGGGGGGGGGGGGGGGGGGGGGGGGGGGGGGGGGGGGGGGG**  
**CCCCGGCTCTGACTGACCGCGTTACTCCACAGGTGAGCGGGGGGACGGCCCTTCTCCTCCGGGCTGTAATTAGCGCTTGGT**  
**TTAATGACGGCTCGTTTCTTTCTGTGGCTGCGTGAAGGCTTAAAGGGCTCCGGGAGGGCCCTTGTGCGGGGGGGGAGCGGC**  
**TCGGGGGGTGCCTGCGTGTGTGTGTGCTGGGAGCGCCGCTGCGGCCCGCGCTGCCCGCGCGCTGTGAGCGCTGCGGG**  
**CGCGGGCGGGGCTTGTGCGCTCCGCTGTGCGCGAGGGGGAGCGCGGGGGGGGGGGGGGGGGGGGGGGGGGGGGGGGGGGGGGG**  
**GCGAGGGGAACAAGGCTGCGTGGGGGGTGTGTGCGTGGGGGGTGTGAGAGGGGGTGTGGCGCGGGCGCTGGGGCTGTAA**  
**CCCCCCCCCTGCACCCCCCTCCCGAGTTGCTGAGCACGGCCCGGCTTCCGGTGCGGGGCTCCGTACGGGGCGTGGCGCGGG**  
**GCTCGCCGTGCCGGCGGGGGGGTGGCGGCAGGTGGGGGTGCCGGCGGGGGCGGGGGCCGCTCGGGCCGGGGAGGGCTCG**  
**GGGGAGGGGGCGGGCGGGCCCCCGAGCGCCGGCGGCTGTGAGGGCGCGGGCGAGCCGACGCCATTGCCTTTTATGGTAATCG**  
**TGCGAGAGGGCGCAGGGACTTCTTTGTCCAAATCTGTGCGGAGCGGAAATCTGGGAGGCGCCCGCCAGCCCCCTCTAGCG**  
**GGCGCGGGCGAAGCGGTGCGGCCCGGCAAGGAATGGCGGAGGGCTTCTGCTGCTGCCCGCCCGCCCGCTCC**  
**CTTCTCCCTCTCCAGCCTCGGGGCTGTCCGCGGGGGACGGCTGCCTTCCGGGGGGACGGGGCAGGGCGGGGTTCCGGCTC**  
**TGGCGTGTGACCGGGCGGCTCTAGAGCCTCTGTAACCATGTTTCATGCCTTCTTCTTTTCTTCTTCTTCTTCTTCTTCTTCTTCT**  
**GTTATTGTGCTGTCTCATCATTGGCAAGAATTTCGCCACC**ATGGTGAGCAAGGGCGAGGAGGATAACATGGCCATCATCAA****  
**GGAGTTCATGCGCTCAAGGTGCACATGGAGGGCTCCGTGAACGGCCACGAGTTCGAGATCGAGGGCGAGGGCGAGGGCC**  
**GCCCTACGAGGGCACCGACCCCAAGCTGAAGGTGACCAAGGGTGGCCCTGCCCTTCCCTGGGACATCCTGTCCC**  
**CTCAGTTCATGTACGGCTCAAGGCCTACGTGAAGCACCCGCGGACATCCCCGACTACTTGAAGCTGTCTTCCCCGAGGG**  
**CTTCAAGTGGGAGCGGTGATGAACCTCGAGGACGGCGGGTGGTACCCTGACCCAGGACTCCTCCTGCAGGACGGCGA**  
**GTTTCATCTACAAGGTGAAGCTGCGCGCACCAACTTCCCTCCGACGGCCCCGTAATGCAGAAGAAGACCATGGGCTGGGA**  
**GGCCTCTCCGAGCGGATGTACCCCGAGGACGGCCCTGAAGGGCGAGATCAAGCAGAGGCTGAAGCTGAAGGACGGCG**  
**GCCACTACGACGCTGAGTCAAGACCACCTACAAGGCCAAGAAGCCGTGCAGCTGCCGGCGCTACAACGTCAACATCA**  
**AGTTGGACATCACTCCACAACGAGACTACACCATCGTGAACAGTACGAACCGCGCCGAGGGCCCACTCCACCCGGC**  
**GCATGGACGAGCTGTACGCGTCTGGAGGCGCCACCAATTTAGCCTGCTGAAACAGGCTGGCGACGTGGAAGAGAACCCTG**  
**GACCTGGACAAAAGTCGTTGAGCAAGGGCGAGGAGCTGTTACCGGGGTGGTGGCCATCCTGGTTCGAGCTGGACGGCGAGC**  
**TAAACGGCCACAAGTTCAGCGTGTCCGGCGAGGGCGAGGGCGATGCCACCTACGGCAAGCTGACCCTGAAGTTCATCTGCA**  
**CCACCGGAAGCTGCCCGTCCCTGGCCACCCTCGTACCACCCTGACCTACGGCGTGCAGTGTTCAGCCGCTACCCCGA**  
**CCACATGAAGCAGCAGCACTTCTTCAAGTCCGCCATGCCGAAGGCTAGCTCAGGAGCGCACCTTCTTCAAGGACGAC**  
**GGCAACTACAAGACCCGCGCCGAGGTGAAGTTCGAGGGCGACACCCTGGTGAACCGCATCGAGCTGAAGGGCATCGACTTC**  
**AAGGAGGACGGCAACATCCTGGGGCACAAGCTGGAGTACAACATAACAGCCACTAGTCTATATCATGGCCGACAAGCA**  
**GAAGAACGGCATCAAGGTGAACCTCAAGATCCGCCACAACATCGAGGACGGCAGCGTGCAGCTGCGCGACCACTACCAGCA**  
**GAACACCCCATCGGCGCAGGCCCGTGTGCTGCCGACAACCCTACCTGAGCACCCAGTCCGCCCTGAGCAAAGACCC**  
**CAACGAGAAGCGCGATCACATGGTCTGTGGAGTTCGTGACCCGCGGGATCACTCTCGGCATGGACGAGCTGTACAA**  
**GTAAGAATTCACTCCTCAGGTGCAGGCTGCCTATCAGAAGGTGGTGGCTGGTGTGGCAATGCCCTGGCTCACAATAACCACTG**  
**AGATCTTTTCCCTCTGCCAAAATATGGGGACATCATGAAGCCCTTGGATCTGACTTCTGGCTAATAAAGGAAATTTATTT**  
**TCATTGCAATAGTGTGTTGGAATTTTTGTGTCTCTCACTCGGAAGGACATATGGGAGGGGTGACAATCAACCTCTGGATTACA**  
**AAATTTGTGAAAGATTGACTGGTATTTAACTATGTTGCTCCTTTTACGCTATGTGGATACGCTGCTTTAATGCCTTTGTATCATG**  
**CGTTAACTAAACTTTGTTTATTCAGCTTATAATGTTTACAATAAAGCAATAGCATCACAAATTTACAATAAAGCAATTTTTCAC**  
**TGCTTCTAGTTGTGTTTTGTCCAAACTCATCAATGATCTTATGCTGGAATTGACTCAAATGATGTCAATTAGTCTATCAGA**  
**AGCTATCTGGTCTCCCTCCGGGGGACAAGACATCCCTGTTAATATTTAACAGCAGTGTCCCAAACCTGGGTTCTTATATCCCT**  
**TGCTCTGGTCAACCAGGTTGCAGGGTTTCTGTCTCACAGGAACGAAGTCCCTAAAGAAACAGTGGCAGCCAGGTTTAGCCCC**  
**GGAATTGACTGGATTCTTTTTTAGGGCCATTGGTATGGCTTTTTCCCCGATCCCCCAGGTGTCTGCAGGCTCAAAGAGCAG**  
**CGAGAAGCGTTCAGAGGAAAGCGATCCCGTCCACCTTCCCCGTGCCGGGCTGTCCCCGACGCTGCCGGCTCGGGATGC**  
**GGGGGAGCGCGGACCGAGCCGAGCCCGGGCGGCTCGCTGCTGCCCTAGCAGGGGAGGGAGGCAATTAATCACTCCCTG**  
**GGGGCTTTGGGGGGGGGCTGTCCCTGATATCTATAACAAGAAAATATATATAATAAGTTATCACGTAAGTAGAACATGAAATAA**  
**CAATATAATTATCGTATGAGTAAATCTAAAAGTACGTAAGATAATCATGCGTCATTTTACTCACGCGGTGTTATAGTTCA**

AAATCAGTGACACTTACCGCATTGACAAGCACGCCTCACGGGAGCTCCAAGCGGGGACTGAGATGTCTAAATGCACAGCGACG  
 GATTCGCGCTATTTAGAAAAGAGAGCAATATTTCAAGAATGCATGCGTCAATTTTACGCAGACTATCTTTCTAGGGTTAATCTAG  
 CTGCATCAGGATCATATCGTCGGGTCTTTTTCCGGCTCAGTCATCGCCCAAGCTGGCGCTATCTGGGCATCGGGGAGGAAGAA  
 GCCCCGTGCCTTTCCCGCAGAGTTGAAGCGGCATGGAAAGAGTTTGCCGAGGATGACTGCTGCTGCATTGACGTTGAGCGAAA  
 ACGCACGTTTACCATGATGATTTCGGGAAGGTGTGGCCATGCACGCCTTTAACGGTGAAGTGTTCGTTTCAGGCCACCTGGGATAC  
 CAGTTTCGTCGCGGCTTTCCGGACACAGTCCGGATGGTCAGCCCGAAGCGCATCAGCAACCCGAACAATACCGGCGACAGCC  
 GGAAGTCCCGTGCCTGTGCAGATTAATGACAGCGGTGCGGCGCTGGGATATTACGTCAGCGAGGACGGGTATCCTGGCTG  
 GATGCCGCAGAAATGGACATGGATACCCCGTGAGTTACCCGGCGCGCTTGGCGTAATCATGGTCATAGCTGTTTCCTGT  
 GTGAAATTGTTATCCGCTCACAATCCACACAACATACGAGCCGGAAGCATAAAGTGTAAGCCTGGGGTGCCTAATGAGTGAG  
 CTAATCACAATTAATTGCGTTGCGCTCACTGCCCGCTTTCCAGTCGGGAAACCTGTCGTGCCAGCTGCATTAATGAATCGGCCAA  
 CGCGCGGGGAGAGGGCGGTTTGCATATTGGGCGCTCTTCCGCTTCCCTCGCTCACTGACTCGCTGCGCTCGGTCTCGGCTGCG  
 GCGAGCGGATCAGCTCACTCAAAGGCGGTAATACGGTTATCCACAGAATCAGGGGATAACGCAGGAAAGAACATGTGAGCAAA  
 AGCCAGCAAAAAGGCCAGGAACCGTAAAAAGGCCGCTGCTGGCGTTTTTCCATAGGCTCCGCCCCCTGACGAGCATCACA  
 AAAATCGACGCTCAAGTCAGAGGTGGCGAAACCCGACAGGACTATAAAGATACCAGGCGTTTTCCCCCTGGAAGCTCCCTCGTGC  
 GCTCTCTGTTCCGACCCTGCCGTTACCGGATACCTGTCCGCTTTCTCCCTTCGGGAAGCGTGGCGCTTTCTCATAGCTCAC  
 GCTGTAGGTATCTCAGTTCGGTGTAGGTCGTTCCGCTCCAAGCTGGGCTGTGTGCACGAACCCCGTTCCAGCCCGACCGCTGC  
 GCCTTATCCGGTAACTATCGTCTTGAGTCCAACCCGGTAAGACACGACTTATCGCCACTGGCAGCAGCCACTGGTAACAGGATT  
 AGCAGAGCGAGGTATGTAGCGGTGCTACAGAGTCTTGAAGTGGTGGCCTAACTACGGCTACACTAGAAGGACAGTATTTGGT  
 ATCTGCGCTCTGCTGAAGCCAGTTACCTTCGGAAGGAGTTGGTAGCTTTGATCCGGCAAAACAAACCCAGCTGGTAGCGGT  
 GGTTTTTTTGTTTGAAGCAGCAGATTACGCGCAGAAAAAAGGATCTCAAGAAGATCCTTTGATCTTTTCTACGGGGTCTGACG  
 CTCAGTGAACGAAAACCTCACGTTAAGGGATTTTGGTCATGAGATTATCAAAAAGGATCTTACCTAGATCCTTTTAAATTAATAA  
 GAAGTTTTAAATCAATCTAAAGTATAATGAGTAAACTTGGTCTGACAGTTACCAATGCTTAATCAGTGAGGCACCTATCTCAGCG  
 ATCTGTCTATTTGTTTATCCATAGTTGCTGACTCCCGTCTGTAGATAACTACGATACGGGAGGGCTTACCATCTGGCCCCA  
 GTGTGCAATGATACCGCGAGACCCAGCTCACCAGGCTCCAGATTTATCAGCAATAAACAGCCAGCCGGAAGGGCCGAGCGC  
 AGAAGTGGTCTGCAACTTTATCCGCTCCATCCAGTCTATTAATTGTTGCCGGAAGCTAGAGTAAGTAGTTCGCCAGTTAATA  
 GTTTGCGCAACGTTGTTGCCATTGCTACAGGCATCGTGGTGTACGCTCGTCTTTGGTATGGCTTCATTACGCTCCGGTTCCCA  
 ACGATCAAGGCGAGTTACATGATCCCCATGTTGTGCAAAAAGCGGTTAGCTCCTTCGGTCTCCGATCGTTGTGAGAAGTAAG  
 TTGGCCGAGTGTATCACTCATGTTATGGCAGCAGTGCATAATTCTTACTGTATGCCATCCGTAAGATGCTTTTCTGTGAC  
 TGGTAGTACTCAACCAAGTCATTCTGAGAATAGTGTATGCGGCGACCGAGTTGCTCTTGGCCGCGTCAATACGGGATAATAC  
 CGCGCCACATAGCAGAACCTTTAAAAGTGCTCATCATTGGAACCGTTCTTCCGGGGCGAAAACCTCAAGGATCTTACCGCTGTTG  
 AGATCCAGTTCGATGTAACCCACTCGTGCACCCAACTGATCTTACGATCTTTTACTTTTACCAGCGTTTTCTGGGTGAGCAAAA  
 CAGGAAGGCCAAAATGCCGCAAAAAGGGAATAAGGGCGACACGAAATGTTGAATACTCAT

2.2.15 Vector 68: Pyl tRNA<sub>CCUA</sub> PylRS mCherry-P2A-eGFP(150TAGG)

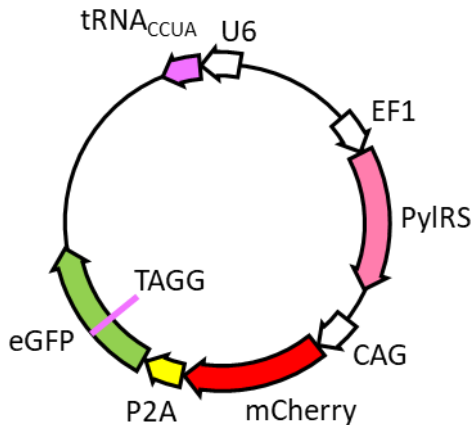

ACTCTTCTTTTTCAATATTATTGAAGCATTATCAGGGTTATTGTCTCATGAGCGGATACATATTTGAATGTATTTAGAAAAATAAA  
 CAAATAGGGGTTCCGCGCACATTTCCCGGAAAAGTGCCACCTAAATGTAAGCGTTAATATTTTGTAAAATTCGCGTTAAATTTTT  
 GTTAAATCAGCTCATTTTTTAACCATAAGGCCGAAATCGGCAAAATCCCTTATAAATCAAAGAATAGACCGAGATAGGGTTGAGT  
 GTTGTCCAGTTTGAACAAGAGTCCACTATTAAGAACGTGGACTCCAACGTCAAAGGGCGAAAACCGTCTATCAGGGCGAT  
 GGCCCACTACGTGAACCATCACCTAATCAAGTTTTTTGGGTCGAGGTGCCGTAAGCACTAAATCGGAACCCATAAGGGGAGC  
 CCCCCATTTAGAGCTTGACGGGGAAAGCCGGCGAACGTGGCGAGAAAGGAAGGGAAGAAAGCGAAAGGAGCGGGCGCTAGGG  
 CGCTGGCAAGTGTAGCGGTCACGCTGCGCGTAACCACACACCCGCCGCGCTTAATGCGCCGCTACAGGGCGCGTCCCATTC  
 GCCATTCAGGCTGCGCAACTGTTGGGAAGGGCGATCGGTGCGGGCTCTTCGCTATTACGCCAGCTGGCGAAAGGGGGATGT  
 GCTGCAAGGCGAATTAAGTTGGTAACGCCAGGGTTTTCCAGTACGACGTTGTA AACGACGGCCAGTGAGCGCGCTCGT  
 CATTACGTTTTTGAACCCGTGGAGACGGGACGACTCGCGTGC AAATGTGTTTTACAGCGTGATGGAGCAGATGAAGATGCT  
 CGACACGCTGCAGAACACGCAGCTAGATTAACCCTAGAAAGATAATCATATTGTGACGTACGTTAAAGATAATCATGCGTAAAAT  
 GACGCATGTGTTTTATCGTCTGTATATCGAGGTTATTTATTAATTTGAATAGATATTAAGTTTTATTATTTTACACTTACATACTA  
 ATAATAAATTAACAACAATTTATTTATGTTTATTTATTTATTA AAAAAAACAAAACCTCAAAATTTCTTCTATAAAGTAACAAAACCT  
 TTATGAGGGACAGCCCCCCCCAAAGCCCCAGGGATGTAATACGTCCCTCCCCCGCTAGGGGGCAGCAGCGAGCCGGCCCC  
 GGGCTCCGCTCCGGTCCGCGCTCCCGGCATCCCGGACCGGACCGTGC GGGGACAGCCGGCACGGGACAGGGTGG  
 CACGGGATCGCTTTCTCTGAACGCTTCTCGCTGCTTTT GAGCCTGCAGACACTGGGGGATACGGGAAAAGGCTAAAAA  
 CCGCACTTGTCCGAAACCCGGGAATCTAACCCGGCTGAACGGATTAGGAGTCCATTTCGATCTACATGATCAGGTTCCGG  
 TGTTTCGCTTTCCACAAGATATATAAAGCCAAGAAATCGAAATACTTTCAAGTTACGGTAAGCATATGATAGTCCATTTTAAAC  
 ATAATTTTAAACTGCAAACTACCCAAAGAAATTAATCTTTCTACGTCAGCATGTAATTTGACTAATATCTTTGTGTTTACAGTCAAAT  
 AATTCTAATTACTCTAACAGCCTTGATCGTATATGCAAAATGACAGGATTCATGGAAATAGGCCCTTTCCTGCCAACCCG  
 GTTGCATCGCTCCGGTCCCGTCAAGTGGCAGAGCGCACATCGCCACAGTCCCGGAGAAGTTGGGGGAGGGGTCGGCAA  
 TTGAACGGGTGCCTAGAGAAGGTGGCGGGGTAACCTGGGAAAGTATGTCGTGACTGGCTCCGCTTTTTCCGAGGGTG

GGGGAGAACCCTATATAAGTGCAGTAGTCGCCGTGAACGTTCTTTTTTCGCAACGGGTTTGCCGCCAGAACACAGCTGAAGCTTC  
GAGGGGCTCGCATCTCTCCTTACGCGCCCGCCGCCCTACCTGAGGCCGCCATCCACGCCGTTGAGTCGCGTTCTGCCGCT  
CCCCGCTGTGGTGCCTCTGAAGTGCCTCCGCGTCTAGGTAAGTTAAAGCTCAGGTCGAGACCGGGCTTTGTCCGGCGCT  
CCCTTGAGCCTACCTAGACTCAGCCGGCTCTCCACGCTTTGCTGACCCTGCTTGCTCAACTCTACGCTTTGTTTCGTTTTCT  
GTTCTGCGCGTTACAGATCCAAGCTGTGACCGGCGCCTACTCTACAGATAGCGTTAAACTTACGCTTGCCACC**ATGGCTAGC**  
**GACTACAAGGACGACGACGACAAGGACAAGAAGCCCTGAACACCCTGATCAGCGCCACAGGACTGTGGATGCCAGAACC**  
**GGCACCATCCACAAGATCAAGCACCACGAGGTGTCCCGTCCAAAATCTACATCGAGATGGCTGCGGGCATCACCTGTGTC**  
**TCAACAACAGCAGAAGCAGCCGGACAGCCAGAGCCCTGCGGCACCACAAGTACAGAAAGACCTGCAAGCGGTGCAGAGTGT**  
**CCGACGAGGACCTGAACAAGTTCCTGACCAAGGCCAACGAGGACCAGACCAGCGTGAAAGTGAAGGTGGTGTCCGCCCCCA**  
**CCCGGACCAAGAAAGCCATGCCAAGAGCGTGGCCAGAGCCCCAAAGCCCTGGAAAACACCGAAGCCGCTCAGGCCAG**  
**CCCAGCGGCAGTAAGTTCAGCCCCGCCATCCCCGTGTCTACCCAGGAAAGCGTCAAGCGTCCCCGCCAGCGTTCACCAGC**  
**ATCTAGCATCTCAACCGGCGCCACAGCTTCTGCCCTGGTCAAGGGCAACCAACCCCATACCAGCATGTCTGCCCTGT**  
**GCAAGCTCTGCCACCCCTGACCAAGTCCCAGACCCGCTGGAAGTGTCTCTGAACCCCAAGGACGATGACGCT**  
**GAACAGCGCAAGCCCTTCCGGGAGCTGGAAGCGAGCTGCTGAGCCGGCGGAAGAAGGACCTCCAGCAAATCTACGCCG**  
**AGGAACGGGAGAACTACCTGGGAAGCTGGAAGAGAGATCACCCGTTCTTCTGAGCCGGGGCTTCTGGAAATCAAGA**  
**GCCCCATCCTGATCCCCCTGGAGTACATCGAGCGGATGGGCATCGACAACGACACCGAGCTGAGCAAGCAGATTTCCGGGT**  
**GGACAAGAATTCTGCCTGCGGCCATGCTGGCCCCAACCTGTACAACCTGCGGAAACTGGATCGCGCTTCCCGAC**  
**CCCATCAAGATTTTCGAGATCGGCCCTGCTACCGGAAAGAGCGACGGCAAGAGCACCTGGAAGATTTACAATGCTGA**  
**ACTTTTCCAGATGGGCAGCGCTGACCCAGAGAGAACCTGGAATCCATCATCACCAGCTTTCTGAACCCATGATGACGCT**  
**CTTCAAGATCGTGGGCGACAGCTGCATGGTGTACGGCGACACCCTGGACGTGATGCACGGCGACCTGGAAGTGTCTAGCGC**  
**CGTCTGGGACCCATCCCTCTGGACCGGGAGTGGGGCATCGATAAGCCCTGGATCGGAGCCGGCTTCCGGCTGGAACGGCT**  
**GCTGAAAGTCAAGCAGACTTAAAGAATCAAGCGGGCTGCCAGAAGCGAGAGCTACTACAACGGCATCAGCACCAACT**  
**GTGATGATAAGGATCCACTAGTCCAGTGTGGTAATTGACATTGATTATTGACTATTATAATAGTAATCAATTACGGGGCTCAT**  
**TAGTTCATAGCCCATATATGGAGTTCGCGCTTACATAAATTACGGTAAATGGCCCGCTGGCTGACCCGCCAACGACCCCGCC**  
**CATTGACGTCAATAATGACGTATGTTCCCATAGTAACGCCAATAGGGACTTTCCATTGACGTCAATGGGTGGAGTATTTACGGTA**  
**AACTGCCCACTTGGCAGTACATCAAGTGTATCATATGCCAAGTACGCCCCCTATTGACGTCAATGACGGTAAATGGCCCGCCTG**  
**GCATTATGCCAGTACATGACCTTATGGGACTTTCTACTTGGCAGTACATCTACGTATTAGTCATCGCTATTACCATGGTCGAGG**  
**TGAGCCCCACGTTCTGCTTCACTCTCCCCATCTCCCCCCCCCCCCACCCCAATTTGTATTTATTTATTTTAAATTTTTGTG**  
**CAGCGATGGGGCGGGGGGGGGGGGGGGCGCGCCAGGCCGGGGCGGGGGCGAGGGCGGGGGCGGGGGCGAGGGC**  
**GAGAGGTGCGGCGCAGCCAATCAGAGCGGCGCGCTCCGAAAGTTTCTTTTATGGCGAGGCGGCGGGCGCGGGCCCTAT**  
**AAAAAGCGAAGCGCGCGGGCGGGGAGTCTGCTGCTTCCCTTCCCGCGTCCCGCGCTCCGCGCCGCTCGCGCCGCCG**  
**CCCCGGCTCTGACTGACCGCTTACTCCACAGGTGAGCGGGCGGGACGGCCCTTCTCTCCGGGCTGTAATTAGCGCTTGGT**  
**TAAATGACGGCTCGTTCTTTCTGTGGCTGCGTGAAGGCTTAAAGGGCTCCGGGAGGGCCCTTGTGCGGGGGGAGCGGC**  
**TCGGGGGTGCGTGTGTGTGTGTGTGTGTGTGTGTGTGTGTGTGTGTGTGTGTGTGTGTGTGTGTGTGTGTGTGTGTGT**  
**CGCGCGCGGGGCTTTGTGCGCTCCGCGTGTGCGCGAGGGGAGCGCGCGCCGGGGCGGTGCCCGCGCTGTGAGCGGG**  
**GCGAGGGGAACAAAGGCTGCGTGTGGGGTGTGTGCGTGGGGGGTGTGAGCAGGGGGTGTGGCGCGGGCGGTGGGCTGTAA**  
**CCCCCCCCCTGCACCCCCCTCCCGAGTTGCTGAGCACGGCCCGCTTCCGGTGTGGGGCTCCGTACGGGGCGTGGCGCGGG**  
**GCTCGCCGTGCGGGCGGGGGTGGCGGCAGGTGGGGTGCCTGGGGCGGGGGCGGGGCCCTCGGGCGGGGAGGGCTCG**  
**GGGAGGGGGCGGGCGCCCGGAGCGCGCGGCTGTGAGGCGCGGGCGAGCCGACGCCATTGCCTTTATGGTAATCG**  
**TCCGAGAGGCGCAGGGACTTCCCTTGTCCAAATCTGTGCGAGCCGAAATCTGGAGGCGCCCTGACCCCTAGCG**  
**GGCGCGGGCGAAGCGGTGCGGCGCCGGCAGGAAGGAAATGGGCGGGGAGGGCCTTCTGCGTGTGCGCGCGCCGCTCC**  
**CTTCTCCCTCTCCAGCCTCGGGGCTGTCCGCGGGGGACGGCTGCCTTCCGGGGGGACGGGGCAGGGCGGGGTTCCGGCTC**  
**TGGCGTGTGACCGGGCGGCTCTAGAGCCCTGCTAACCATGTTTCATGCTTCTTCTTTTCTTCTTCTTCTTCTTCTTCTTCT**  
**GTTATTGTGCTGTCTCATTTTTGGCAAAGAATTCGCCACC**ATGGTGAGCAAGGGCGAGGAGGATAACATGGCCATCATCAA****  
**GGAGTTCATGCGCTTCAAGGTGCATGAGGGCTCGTGAACGGCCACGAGTTCGAGATCGAGGGCGAGGGCGAGGGC**  
**GCCCCATCAGAGGGCACCCAGACCGCCAAGCTGAAGGTGACCAAGGGTGGCCCCCTGCCCTTCGCTGGGACATCCTGTCC**  
**CTCAGTTCATGTACGGCTCAAGGCCTACGTGAAGCACCCCGCCGACATCCCCGACTACTTGAAGCTGTCTTCCCCGAGGG**  
**CTTCAAGTGGGAGCGCGTGAATTCGAGGACGGCGGGCTGGTGAACCGTACCCAGGACTCCTCCCTGCAGGACGGCGA**  
**GTTTCATACAAGGTGAAGCTGCGCGCACCAACTTCCCTCCGACGGCCCCGTAATGCAGAAGAAGACCATGGGCTGGGA**  
**GGCCTCTCCGAGCGGATGATACCCCGAGGACGGCCCTGAAGGGCGAGATCAAGCAGAGGCTGAAGCTGAAGGACGGCG**  
**GCCACTACGACGCTGAGTCAAGACCCTACAAGGCCAAGAAGCCGTCAGCTGCCGGCGCTACAACCTCAACATCA**  
**AGTTGGACATCACCTCCACAACGAGGACTACACCATCGTGAACAGTACGAACGCGCCGAGGGCGCCACTCCACCGCG**  
**GCATGGACGAGCTGTACGCGTGTGAGGC**GCCACCAATTTAGCCTGCTGAAACAGGCTGGCGACGTGGAAGAGAACCCTG****  
****GACCTGGACAAAAGTCGGTGAGCAAGGGCGAGGAGCTGTTACCCGGGTGGTGCCATCCTGGTTCGAGCTGGACGGCGACG****  
**TAAACGGCCACAAGTTCAGCGTGTCCGGCGAGGGCGAGGGCGATGCCACCTACGGCAAGCTGACCTGAAGTTCATCTGCA**  
**CCACCGCAAGCTGCCCGTCCCTGGCCACCCTCGTACCACCTGACCTACGCGTGCAGTCTTACGCCCTACCCCGA**  
**CCACATGAAGCAGCACGACTTCTTCAAGTCCGCCATGCCGAAGGCTACGTCCAGGAGCGCACCATCTTCTTCAAGGACGAC**  
**GGCAACTACAAGACCCGCGCCGAGGTGAAGTTCGAGGGCGACACCCTGGTGAACCGCATCGAGCTGAAGGGCATCGACTTC**  
**AAGGAGGACGGCAACATCCTGGGGCACAAGCTGGAGTACAACATAACAGCCACT**TAGG**GTCTATATCATGGCCGACAAGCA**  
**GAAGAACGGCATCAAGGTGAACCTCAAGTCCGCCACAACATCGAGGACGGCAGCGTGCAGCTGCCGACCACTACAGCA**  
**GAACACCCCATCGGCGACGGCCCGTGTGTCTGCCGACAACCACTACCTGAGCACCCAGTCCGCCCTGAGCAAAAGACCC**  
**CAACGAGAAGCGGATCACATGGTCTGCTGGAGTTCGTGACCGCCGCGGGATCACTCTCGGCATGGACGAGCTGTACAA**  
**GTAAGAATTCACTCCTCAGGTGCAGGCTGCCTATCAGAAGGTGGTGGCTGGTGTGGCAATGCCCTGGCTCACAATACCACTG**  
**AGATCTTTTTCCCTCTGCCAAAATATGGGGACATCATGAAGCCCTTGAAGTCTGACTTCTGGCTAATAAAGGAAATTTATTT**  
**TCATTGCAATAGTGTGTTGGAATTTTTGTGTCTCTCACTCGGAAGGACATATGGGAGGGTGCACAATCAACCTCTGGATTACA**  
**AAATTTGTGAAAGATTGACTGGTATTCTAACTATGTTGCTCCTTTACGCTATGTGGATACGCTGCTTAAATGCCTTTGTATCATG**  
**CGTTAACTAACTTTGTTTATTGACGTTAATGGTTACAATAAAGCAATAGCATCACAAATTTCACAAATAAAGCCTTTTTTTCAC**  
**TGCATTCTAGTTGTGGTTTGTCCAAACTCATCAATGTATCTTATCATGTCTGGAATTGACTCAAATGATGTCAATTAGTCTATCAGA**  
**AGCTATCTGGTCTCCCTCCGGGGGACAAGACATCCCTGTTAATATTTAAACAGCAGTGTCCCAAACCTGGGTTCTTATATCCCT**  
**TGCTCTGGTCAACCAGTTGACGGTTTTCTGTCTCACAGGAACGAAGTCCCTAAAGAAACAGTGGCAGCCAGGTTTAGCCCC**  
**GGAATTGACTGGATTCTTTTTAGGGCCATTGGTATGGCTTTTTCCCGGATCCCCCAGGTGCTGCAGGCTCAAAGAGCAG**  
**CGAAAGCGTTAGAGGAAAGGACGATCCCGTGCACCTTCCCGTCCCGGATCCCCGACGCTGCCCCGACGCTGCGGGTGC**  
**GGGGGGAGCGCCGACCGGAGCGGAGCCCGGGCGGCTCGCTGCTGCCCCCTAGCGGGGGAGGGACGTAATTACATCCCTG**  
**GGGGCTTTGGGGGGGGGCTGTCCCTGATATCTATAACAAGAAAATATATATAATAAGTTATCACGTAAGTAGAACATGAAATAA**

CAATATAATTATCGTATGAGTAAATCTTAAAAGTCACGTAAAAGATAATCATGCGTCATTTTGACTCACGCGGTGCTTATAGTTCA  
AAATCAGTGACACTTACCGCATTGACAAGCACGCCTCACGGGAGCTCCAAGCGGCGACTGAGATGTCTAAATGCACAGCGACG  
GATTCGCGCTATTTAGAAAAGAGAGCAATATTTCAAGAATGCATGCGTCAATTTTACGCAGACTATCTTTCTAGGGTTAATCTAG  
CTGCATCAGGATCATATCGTCGGGTCTTTTTCCGGCTCAGTCATCGCCCAAGCTGGCGCTATCTGGGCATCGGGGAGGAAGAA  
GCCCCGTGCCCTTTCCCGCGAGGTTGAAGCGGCATGGAAGAGTGGCCGAGGATGACTGCTGCTGCATTGACGTTGAGCGAAA  
ACGCACGTTTACCATGATGATTTCGGGAAGGTGTGGCCATGCACGCCTTTAACGGTGAAGTGTTCGTTTCAGGCCACCTGGGATAC  
CAGTTCTGTCGCGGCTTTCCGGACACAGTCCGGATGGTCAGCCCGAAGCGCATCAGCAACCCGAACAATACCGGCACAGCC  
GGAAGTCCCGTGCAGCTCACTCAAAGCGGTAATACGTTATCCACAGAATCAGGGGATAACGCAGGAAAGAACATGTGAGCAA  
GATGCCGCAGAAATGGACATGGATAACCCGTGAGTTACCCGGCGGGCGCGCTTGGCGTAATCATGGTCATAGCTGTTTCTGT  
GTGAAATTGTTATCCGCTCACAATCCACACAACATACGAGCCGGAAGCATAAAGTGTAAAGCCTGGGGTGCCTAATGAGTGAG  
CTAACTCACATTAATTGCGTTGCGCTCACTGCCCGCTTTCCAGTCGGGAAACCTGTGCTGCCAGCTGCATTAATGAATCGGCCAA  
CGCGCGGGGAGAGGCGGTTTGCATTTGGCGCTCTTCCGCTTCTCGCTCACTGACTCGCTGCGCTCGGTCCGTTCCGGCTGCG  
GCGAGCGGTATCAGCTCACTCAAAGCGGTAATACGTTATCCACAGAATCAGGGGATAACGCAGGAAAGAACATGTGAGCAA  
AGGCCAGCAAAAAGGCCAGGAACCGTAAAAAGGCCGCGTGTGCTGGCGTTTTTCCATAGGCTCCGCCCCCTGACGAGCATCACA  
AAAATCGACGCTCAAGTCAGAGGTGGCGAAACCCGACAGGACTATAAAGATACCAGGCGTTTCCCCCTGGAAGCTCCCTCGTGC  
GCTCTCCTGTTCCGACCCTGCCGTTACCGGATACCTGTCCGCTTTCTCCCTTCGGGAAGCGTGGCGCTTTCTCATAGCTCAC  
GCTGTAGGTATCTCAGTTCGGTGTAGTTCGTTCCGCTCCAAGCTGGGCTGTGTGCACGAACCCCGTTTCAGCCCGACCGCTGC  
GCCTTATCCGGTAACTATCGTCTTGTAGTCCAACCCGGTAAGACAGACTTATCGCCACTGGCAGCAGCCACTGGTAACAGGAT  
AGCAGAGCGAGGTATGTAGCGGTGCTACAGAGTCTTGAAGTGGTGGCCTAACTACGGCTACACTAGAAGGACAGTATTTGGT  
ATCTGCGCTCTGCTGAAGCCAGTTACCTTCGGAAGAAAGAGTGGTAGCTCTTGTATCCGGCAAAACAAACCACCGCTGGTAGCGGT  
GGTTTTTTGTTTGAAGCAGCAGATTACGCGCAGAAAAAAGGATCTCAAGAAGATCCTTTGATCTTTTCTACGGGGTCTGACG  
CTCAGTGAACGAAAACCTCACGTTAAGGGATTTTGGTCATGAGATTATCAAAAAGGATCTTCACCTAGATCCTTTTAAATTAATAA  
GAAGTTTAAATCAATCTAAAGTATATGAGTAACTTGGTCTGACAGTTACCAATGCTTAATCAGTGAGGCACCTATCTCAGCG  
ATCTGTCTATTTTCGTTTCATCCATAGTTGCCTGACTCCCCGTCGTGTAGATAACTACGATACGGGAGGGCTTACCACTCGGCCCA  
GTGCTGCAATGATACCGCGAGACCCACGCTCACCGGCTCCAGATTTATCAGCAATAAACCCAGCCAGCCGGAAGGGCCGAGCGC  
AGAAGTGGTCTGCAACTTTATCCGCTCCATCCAGTCTATTAATTGTTGCCGGGAAGCTAGAGTAAGTAGTTCGCCAGTTAATA  
GTTTGGCGAACGTTGTTGCCATTGCTACAGGCATCGTGGTGTACGCTCGTCTTGGTATGGCTTCATTACAGCTCCGGTTCCCA  
ACGATCAAGGCGAGTTACATGATCCCCCATGTTGTGCAAAAAAGCGTTAGCTCCTTCGGTCTCCGATCGTTGTGAGAAGTAAG  
TTGCCCGCAGTGTATCACTCATGTTATGGCAGCACTGCATAATTCTTACTGTGCATGCCATCCGTAAGATGCTTTTCTGTGAC  
TGGTGAAGTACTCAACCAAGTCATTCTGAGAATAGTGTATGCCGGGACCGAGTTGCTCTTGGCCGCGTCAATACGGGATAATAC  
CGCGCCACATAGCAGAACCTTAAAAGTGCTCATCATTGGAACCGTCTTCCGGGGCGAAAACCTCTCAAGGATCTTACCGCTGTTG  
AGATCCAGTTCGATGTAACCCACTCGTGCACCCAACTGATCTTCAGCATCTTTTACTTTTACCAGCGTTTCTGGGTGAGCAAAAA  
CAGGAAGGCCAAAATGCCGCAAAAAAGGGAATAAGGGCGACACGGAAATGTTGAATACTCAT

2.2.16 Vector 69: Pyl tRNA<sub>GCUA</sub> PylRS mCherry-P2A-eGFP(150TAGC)

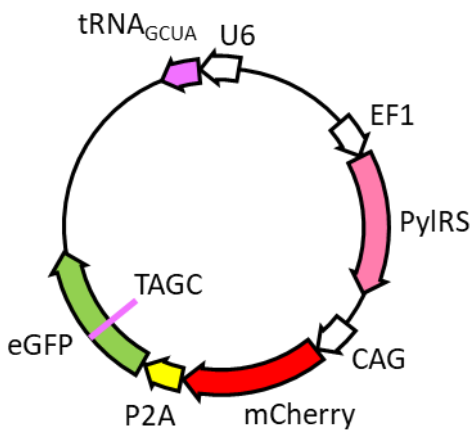

ACTCTTCTTTTTCAATATTATTGAAGCATTATCAGGGTTATTGTCTCATGAGCGGATACATATTTGAATGTATTTAGAAAAATAAA  
CAAATAGGGGTTCCGCGCACATTTCCCGGAAAAGTGCCACCTAAATTTGTAAGCGTTAATATTTTGTAAAATTCGCGTTAAATTTTT  
GTTAAATCAGCTCATTTTTTAACCAATAGGCCGAAATCGGCAAAATCCCTATAAATCAAAGAATAGACCGAGATAGGGTTGAGT  
GTTGTTCCAGTTTGGAAACAAGAGTCCACTATTAAGAACGTGGACTCCAACGTCAAAGGGCGAAAAACCGTCTATCAGGGCGAT  
GGCCCACTACGTGAACCATCACCTAATCAAGTTTTTTGGGGTCGAGGTGCCGTAAGCACTAAATCGGAACCCCTAAAGGGAGC  
CCCCGATTTAGAGCTTGACGGGGAAAGCCGGCGAACGTGGCGAGAAAGGAAGGGAAGAAAGCGAAAGGAGCGGGCGCTAGGG  
CGCTGGCAAGTGTAGCGGTGACGCTGCGCGTAACCACCACACCCGCGCGCTTAATGCGCCGCTACAGGGCGCGTCCCATTCC  
GCCATTCAGGCTGCGCACTGTTGGGAAGGGCGATCGGTGCGGCTCTTCGCTATTACGCCAGCTGGCGAAAGGGGGATGT  
GCTGCAAGCGATTAAGTTGGTAACGCCAGGGTTTTCCAGTCACGACGTTGTAAAACGACGGCCAGTGAGCGCGCCTCGTT  
CATTACGTTTTTTGAACCCGTGGAGGACGGGACAGCTCGCGGTGCAAAATGTGTTTTACAGCGTGATGGAGCAGATGAAGATGCT  
CGACACGCTGCAGAACACGCAGCTAGATTAACCCTAGAAAGATAATCATATTGTGACGTACGTTAAAGATAATCATGCGTAAAAT  
GACGCATGTGTTTTATCGTCTGTATATCGAGGTTATTTAATTTGAATAGATTAAGTTTTATTATTTACACTTACATACTA  
ATAATAAATCAACAACAATTTATTTATGTTTATTTATTTAATAAAAAAACAACAACTCAAAATTTCTTCTATAAAGTAAACAAAAT  
TTATGAGGGACAGCCCCCCCCAAAGCCCCAGGATGTAATTACGTCCTCCCTCCCGCTAGGGGCGAGCAGCGAGCCGCCCG  
GGGCTCCGCTCCGGTCCGCGCTCCCCCGCATCCCCGAGCCGCGAGCGTGCGGGGACAGCCGGCCACGGGAAGGTGG  
CACGGGATCGCTTCTCTGAACGTTCTCGCTGCTCTTTGAGCCTGCAGACACCTGGGGGGATACGGGGAAAAGGCCATAAAA  
CCGCACTTGTCCGAAACCCCGGGAATCTAACCCGGCTGAACGGATTAGCAGTCCATTTCGATCTACATGATCAGGTTCCGG  
TGTTTCGTCTTTCCACAAGATATATAAAGCCAAAGAAATCGAAATCACTTTCAAGTTACGGTAAGCATATGATAGTCCATTTAAAC  
ATAATTTAAAACCTACCAACCCAAAGAAATTTACTTTACGTCACGTAATTTGTACTAATATCTTTGTGTTTACAGTCAAAT  
AATTCATAATTACTCTCTAACAGCCTTGATCGTATATGCAAAATGAAGGAATCATGGGAAATAGGCCCTTCTCCGCCAACCG  
GTTGCGATCGCTCCGGTGCCGTCAGTGGGCGAGCGCACATCGCCACAGTCCCCGAGAAGTTGGGGGGAGGGTCCGGCAA



GGGGCTTTGGGGGGGGGGCTGTCCCTGATATCTATAACAAGAAAATATATATAATAAGTTATCACGTAAGTAGAACATGAAATAA  
 CAATATAATTATCGTATGAGTTAAATCTTAAAAGTCACGTAAGATAATCATGCGTCATTTTACTCACGCGGTGTTATAGTTCA  
 AAATCAGTGACACTTACCGCATTGACAAGCACGCCCTCACGGGAGCTCCAAGCGGGCGACTGAGATGCTCTAAATGCACAGCGACG  
 GATTCGCGCTATTTAGAAAAGAGAGCAATATTTCAAGAATGCATGCGTCAATTTTACGCAGACTATCTTTCTAGGGTTAATCTAG  
 CTGCATCAGGATCATATCGTCGGGTCTTTTTCCGGCTCAGTCATCGCCCAAGCTGGCGCTATCTGGGCATCGGGGAGGAAGAA  
 GCCCGTGCCTTTTCCCGCGAGGTTGAAGCGGCATGGAAGAGATTTGCCGAGGATGACTGCTGCTGACATTGACGTTGAGCGAAA  
 ACGCAGCTTTACCATGATGATTCGGGAAGGTGTGGCCATGCACGCCCTTAAACGGTGAACGTTTCGTTTCAGGCCACCTGGGATA  
 CAGTTCCGTCGCGCTTTTTCCGGACACAGTCCGGATGGTCAGCCCGAAGCGCATCAGCAACCCGAACAATACCGGCGACAGCC  
 GGAAGTCCCGTGCCGGTGTGCAGATTAATGACAGCGGTGCGGCGCTGGGATATTACGTCAGCGAGGACGGGTATCCTGGCTG  
 GATGCCGACAGAAATGGACATGGATACCCCGTGAGTTACCCGGCGGGCGCGCTTGGCGTAATCATGGTCATAGCTGTTTCCTGT  
 GTGAAATTGTTATCCGCTCACAATCCACACAACATACGAGCCGGAAGCATAAAGTGTAAGCCTGGGGTGCCTAATGAGTGAG  
 CTAAGTCACTAATTTGCGTTGCGCTCACTGCCCGCTTTCCAGTCGGGAAACCTGTGCTGCCAGCTGCATTAATGAATCGGCCAA  
 CGCGCGGGGAGAGGGCGTTTGGCTATTGGGCGCTTTCCGCTTCCCTCGTCACTGACTCGCTCGGTCGGTTCGGCTGCG  
 GCGAGCGGTATCAGCTCACTCAAAGGCGGTAATACGGTTATCCACAGAATCAGGGGATAACGCAGGAAAGAACATGTGAGCAAA  
 AGGCCAGCAAAAGGCCAGGAACCGTAAAAAGGCCGCGTTGCTGGCGTTTTTCCATAGGCTCCGCCCCCTGACGAGCATCACA  
 AAAATCGACGCTCAAGTCAGAGGTGGCGAAACCCGACAGGACTATAAAGATACCAGGCGTTTTCCCCCTGGAAGCTCCCTCGTGC  
 GCTCTCCTGTTCCGACCCCTGCCGCTTACCGGATACCTGTCCGCTTTCTCCCTTCGGGAAGCGTGGCGCTTTCTCATAGCTCAC  
 GCTGTAGGTATCTCAGTTCGTTGTTAGTTCGTTCCGTTCAAGTGGGCTGTGTGCACGAACCCCGTTTCAGCCCGACCGCTGC  
 GCCTTATCCGGTAACTATCGTCTTGGTCCAACCCGTAAGACACGACTTATCGCCACTGGCAGCAGCCACTGGTAAACAGGATT  
 AGCAGAGCGAGGTATGTAGGCGGTGCTACAGAGTTCTTGAAGTGGTGGCTAACTACGGCTACACTAGAAGGACAGTATTTGGT  
 ATCTGCGCTCTGCTGAAGCCAGTTACCTTCGGAAAAAGAGTTGGTAGCTCTTGATCCGGCAAACAACCACCGCTGGTAGCGGT  
 GGTTTTTTGTTTGAAGCAGCAGATTACGCGCAGAAAAAAGGATCTCAAGAAGATCCTTTGATCTTTTCTACGGGGTCTGACC  
 CTCAGTGAACGAAAACCTCACGTTAAGGGATTTTGGTCATGAGATTATCAAAAAGGATCTTACCTAGATCCTTTTAAATAAAAAT  
 GAAGTTTTAAATCAATCAAAGTATATGAGTAAACTTGGTCTGACAGTTACCAATGCTTAATCAGTGAGGCACCTATCTCAGCG  
 ATCTGTCTATTTTGGTTATCCATAGTTGCCTGACTCCCGCTCGTGTAGATAACTACGATACGGGAGGGCTTACCATCTGGCCCA  
 GTGCTGCAATGATACCGCGAGACCCACGCTCACCGGCTCCAGATTTATCAGCAATAAACCAGCCAGCCGGAAGGGCCGAGCGC  
 AGAAGTGGTCTGCAACTTTATCCGCCCTCATCCAGTCTATTAATTGTTGCCGGGAAGCTAGAGTAAGTAGTTCGCCAGTTAATA  
 GTTTGCGCAACGTTGTTGCCATTGCTACAGGCATCGTGGTGTACGCTCGTCTTGGTATGGCTTCACTCAGCTCCGGTCCCA  
 ACGATCAAGGCGAGTTACATGATCCCCCATGTTGTGCAAAAAAGCGTTAGCTCCTTCGGTCTCCGATCGTTGTCAGAAGTAAG  
 TTGGCCGAGTGTATCACTCATGTTATGGCAGCACTGCATAAATCTTACTGTATGCCATCCGTAAGATGCTTTTCTGTGAC  
 TGGTGAGTACTCAACCAAGTCATTCTGAGAATAGTGTATGCGGCGACCGAGTTGCTCTTGGCCGCGTCAATACGGGATAATAC  
 CGCGCCACATAGCAGAACCTTAAAAGTGCTCATATTGAAAACGTTCTTCCGGGGCGAAAACCTCTCAAGGATCTTACCGCTGTTG  
 AGATCCAGTTCGATGTAACCCACTCGTGCACCCAACTGATCTTACGATCTTTTACTTTTACCAGCGTTTTCTGGGTGAGCAAAAA  
 CAGGAAGGCAAAATGCCGCAAAAAAGGGAATAAGGGCGACACGGAAATGTTGAATACTCAT

2.2.17 Vector 71: Tyr tRNA<sub>CUA</sub> TyrRS\* mCherry-P2A-eGFP(150TAG)

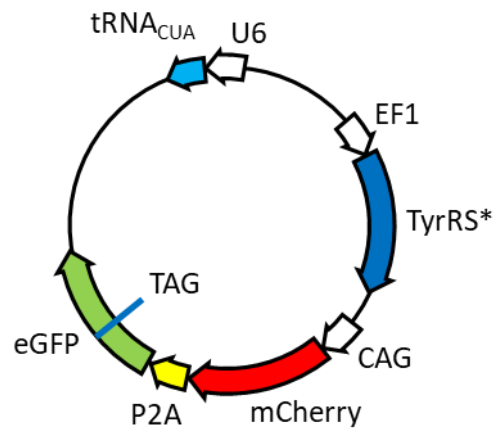

ACTCTTCCTTTTCAATATTATGAAGCATTATCAGGGTTATTGTCTCATGAGCGGATACATATTTGAATGTATTTAGAAAAATAA  
 CAAATAGGGTCCGCGCACATTTCCCGAAAAGTGCCACCTAAATGTAAGCGTTAATATTTGTTAAAATTCGCGTTAAATTTTT  
 GTTAAATCAGCTCATTTTTTAAACCAATAGGCCGAAAATCGGCAAAAATCCCTTATAAATCAAAAAGAATAGACCGAGATAGGGTTGAGT  
 GTTGTCCAGTTTGAACAAGAGTCCACTATTAAGAACGTGGACTCCAACGTCAAAGGGCGAAAAACCGTCTATCAGGGCGAT  
 GGCCCACTACGTGAACCATCACCTAATCAAGTTTTTTGGGGTTCGAGGTGCCGTAAGCACTAAATCGGAACCCCTAAAGGGAGC  
 CCCCAGTTTAGAGCTTGACGGGGAAAGCCGGCGAACGTGGCGAGAAAGGAAGGAAAGCGAAAGGAGCGGGCGCTAGGG  
 CGCTGGCAAGTGTAGCGGTACGCTGCGCGTAACCACACACCCCGCCGCTTAAATGCGCCGCTACAGGGCGCGTCCCATT  
 GCCATTACGGTACGCAACTGTTGGGAAGGGCGATCGGTGCGGGCCTTCTCGCTATTACGCCAGCTGGCGAAAAGGGGGATGT  
 GCTGCAAGGCGATTAAGTTGGGTAACGCCAGGGTTTTCCAGTACGACGTTGTA AACGACGGCCAGTGAGCGCGCTCGTT  
 CATTACGTTTTTGAACCCGTGGAGGACGGCAGACTCGCGGTGCAATGTGTTTTACAGCGTGATGGAGCAGATGAAGATGCT  
 CGACACGCTGCAGAACACGCAGCTAGATTAACCCTAGAAAGATAATCATATTGTGACGTACGTTAAAGATAATCATGCGTAAAAT  
 CAGCGATGTGTTTTATCGTGTATATCGAGGTTATTTATTAATTTGAATAGATATTAAGTTTTATTATTTACACTTACATACTA  
 ATAATAAATCAACAACAATTTATTTATTTATTTATTTAAAAAAAACAAAACCTAAAATTTCTTATAAAGTAAACAACAATTT  
 TTATGAGGGACAGCCCCCCCCCAAAAGCCCCAGGGATGTAATTACGTCCCTCCCCCGTAGGGGGCAGCAGCGAGCCGCCG  
 GGGCTCCGCTCCGGTCCGGCGCTCCCCCGCATCCCCGAGCCGGCAGCGTGGGGGACAGCCGGGCAGGGGAAGGTGG  
 CACGGGATCGCTTCTCTGAACGCTTCTCGCTGCTTTGAGCCTGCAGACCTGGGGGGATACGGGGAAAAGGCCATAAAAA  
 CCACACTTGTCTGGTGGGGGAAGGATTCGAACCTTCGAAGTCTGTGACGGCAGATTAGAGTCTGCTCCCTTGGCCGCTCGG  
 GACCCACCCGGTGTTCGTCTTCCACAGATATATAAGGCCAAGAATCGAAACTTTCAAGTTACTGTAAGCATATGATGAT  
 TCCATTTTAAAACATAATTTTAAAAGTCAAACCTACCCAAAGAAATTTACTTTCTACGTCAGTATTTTGTACTAATATCTTTGT  
 TACAGTCAAATTAATTCTAATTATCTCTAACAGCCTTGATCGTATATGCAAAATGAAGGAATCATGGGAATAGGCCCTCTC





GGGGGCTGTCCCTGATATCTATAACAAGAAAATATATATAATAAGTTATCACGTAAGTAGAACATGAAATAACAATAATTATC  
 GTATGAGTTAAATCTTAAAAGTCACGTAAGATAATCATGCGTCAATTTGACTCACGCGGTCGTTATAGTTCAAAAACAGTGACA  
 CTTACCGCATTGACAAGCACGCCTCACGGGAGCTCCAAGCGGGGACTGAGATGTCTAAATGCACAGCGACGGATTTCGCGCTA  
 TTTAGAAAAGAGAGCAATATTTCAAGAATGCATGCGTCAATTTACGCAGACTATCTTTCTAGGGTTAATCTAGCTGCATCAGGA  
 TCATATCGTGGGTCTTTTTCCGGCTCAGTCATCGCCCAAGCTGGCGCTATCTGGGCATCGGGGAGGAAGAAGCCCGTGCCCT  
 TTCCCGCAGGTTGAAGCGGCATGGAAAAGAGTTTGCCGAGGATGACTGCTGCTGATTGACGTTGAGCGAAAACGCACGTTTAC  
 CATGATGATTCGGGAAGGTGTGGCCATGCACGCCTTAAACGGTGAACGTGTTCTGTTAGGCCACCTGGGATACCAGTTCCGTCGG  
 GCTTTCCGGACACAGTTCCGGATGGTCAGCCCGAAGCGCATCAGCAACCCGAACAATACCAGCGACAGCCGGAACCTGCCGTG  
 CCGGTGTGCAGATTAATGACAGCGGTGCGGCGCTGGGATATTACGTCAGCGAGGACGGGTATCCTGGCTGGATGCCGAGAAA  
 TGGACATGGATACCCCGTGAGTTACCCGGCGGGCGCGCTGGCGTAATCATGGTCATAGCTGTTTCTGTGTGAAATTGTTATC  
 CGCTCACAATTCACACACATACGAGCCGGAAGCATAAAGTGTAAAGCCTGGGGTGCCCTAATGAGTGAGCTAACTCACATTAAT  
 TGCGTTGCGCTCACTGCCCGCTTTCCAGTCGGGAAACCTGTGCTGCCAGCTGCATTAATGAATCGGCCAACGCGCGGGGAGAG  
 GCGTTTTGCGTATTGGGCGCTTCCGCTTCCGCTCACTGACTCGTGCCTCGGCTCGGTCGTTCCGGCTGCGGCGAGCGGTATCA  
 GCTCACTCAAAGGCGGTAATACGGTTATCCACAGAATCAGGGGATAACGCAGGAAAGAATGTGAGCAAAAAGGCCAGCAAAAAG  
 GCCAGGAACCGTAAAAGGCCGCTTGTGCGCTTTTTCCATAGGCTCCGCCCCCTGACGAGCATCAGAAAATCGACGCTCA  
 AGTCAGAGGTGGCGAAACCCGACAGGACTATAAAGATACCAGGCGTTTCCCCCTGGAAGCTCCCTCGTGCGCTCTCCTGTTCCG  
 ACCCTGCCGCTTACCGGATACCTGTCCGCTTTCTCCCTTCGGGAAGCGTGGCGCTTTCTCATAGCTCACGCTGTAGGTATCTC  
 AGTTCCGTGTAGTCTGCTCCAGCTCCAAGCTGGGCTGTGTGCACGAACCCCGTTCAGCCCGACCGCTGCGCCTTATCCGGTAA  
 CTATCGTCTTGAGTCCAACCCGGTAAGACACGACTTATCGCCACTGGCAGCAGCCACTGGTAACAGGATTAGCAGAGCGAGGTA  
 TGTAGGCGGTGCTACAGAGTTCTTGAAGTGGTGGCCTAACTACGGCTACACTAGAAGGACAGTATTTGGTATCTGCGCTCTGCT  
 GAAGCCAGTTACCTTCGGAAGAAAGAGTTGGTAGCTCTTGATCCGGCAACAAACCACCGCTGGTAGCGGTGGTTTTTTGTTTGC  
 AAGCAGCAGATTACGCGCAGAAAAAAGGATCTCAAGAAGATCCTTTGATCTTTTCTACGGGGTCTGACGCTCAGTGGAAACGAAA  
 ACTCACGTTAAGGGATTTTGGTATGAGATTATCAAAAAGGATCTCACCTAGATCCTTTAAATTAATAAATGAAGTTTTAAATCAA  
 TCTAAAGTATATATGAGTAAACTTGGTCTGACAGTTACCAATGCTTAATCAGTGAGGCACCTATCTCAGCGATCTGTCTATTTTCGT  
 TCATCCATAGTTGCTGACTCCCGTCTGTAGATAACTACGATACGGGAGGGCTTACCATCTGGCCCCAGTGCTGCAATGATA  
 CCGCGAGACCCACGCTCACCGGCTCCAGATTTATCAGCAATAAACCAGCCAGCCGGAAGGGCCGAGCGCAGAAGTGGTCTCTGC  
 AACTTTATCCGCTCCATCCAGTCTATTAATTGTTGCCGGGAAGCTAGAGTAAGTAGTTCGCCAGTTAATAGTTTGCGCAACGTTG  
 TTGCCATTGCTACAGGCATCGTGGTGTACGCTCGTCTTGGTATGGCTTCATTAGCTCCGGTTCCCAACGATCAAGGCGAG  
 TTACATGATCCCCATGTTGTGCAAAAAGCGGTTAGCTCCTTCGGTCTCCGATCGTTGTGCAGAAGTAAGTTGGCCGAGTGT  
 ATCACTCATGTTATGGCAGCACTGCATAATTCTTACTGTATGCCATCCGTAAGATGCTTTTCTGTGACTGGTGTAGTACTCAA  
 CCAAGTCATTCTGAGAATAGTGTATGCGGCGACCGAGTTGCTCTTGCCCGGCGTCAATACGGGATAATACCGCGCCACATAGCA  
 GAACTTTAAAAGTGTCTCATATTGAAAACGTTCTTCGGGGCGAAAACCTCTCAAGGATCTTACCGCTGTTGAGATCCAGTTTCGAT  
 GTAACCACTCGTGACCCAACCTGATCTTCAGCATCTTTACTTTCACCAAGCGTTTCTGGGTGAGCAAAAACAGGAAGGCCAAAAT  
 GCCGCAAAAAGGGAATAAGGGCGACAGGAAATGTTGAATACTCAT

**2.2.18 Vector 73: 4x(PyI tRNA<sub>UCCU(Ev2)</sub>) PyIRS mCherry-P2A-eGFP(150AGGA)**

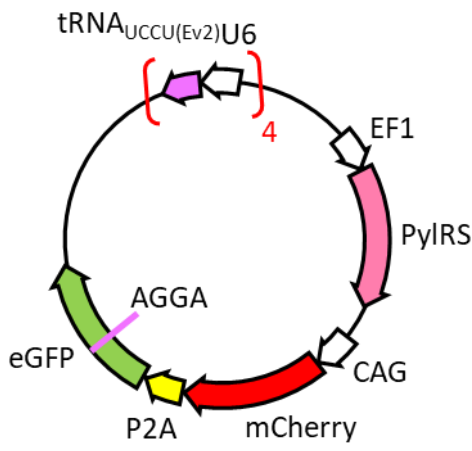

ACTCTTCTTTTTCAATATTATTGAAGCATTATCAGGGTTATTGTCTCATGAGCGGATACATATTTGAATGTATTTAGAAAAATAA  
 CAAATAGGGGTTCCGCGCACATTTCCCGAAAAGTGCCACCTAAATGTAAGCGTAAATATTTGTTAAAATTCGCGTTAAATTTT  
 GTTAAATCAGCTCATTTTTTAAACCAATAGGCCGAAAATCGGCAAAAATCCCTATAAATCAAAAGAATAGACCGAGATAGGGTTGAGT  
 GTTGTCCAGTTTGAACAAGAGTCCACTATTAAGAAGCTGGACTCCAACGTCAAAGGGCGAAAACCGTCTATCAGGGCGAT  
 GGCCCACTAGTGAACCATCACCTAATCAAGTTTTTGGGTCGAGGTGCCGTAAGCACTAAATCGGAACCTAAAGGGAGC  
 CCCCATTAGAGCTTGACGGGGAAAGCCGGCGAACGTGGCGAGAAAGGAAGGGAAAGAAAGCGAAAAGGAGCGGGCGCTAGGG  
 CGCTGGCAAGTGTAGCGGTACGCTGCGGTAACCACCACACCCGCCGCTTAATGCGCCGTACAGGGCGCGTCCATTCC  
 GCCATTCAGGCTGCGCAACTGTTGGGAAGGGCGATCGGTGCGGGCCTTTCGCTATTACGCCAGCTGGCGAAAGGGGGATGT  
 GCTGCAAGGCGATTAAGTTGGGTAACGCCAGGGTTTTCCAGTCAACGAGCTTGTAAAACGACGGCCAGTGAGCGCGCCTCGTT  
 CATTACGTTTTTGAACCGTGGAGGACGGGCGAGACTCGCGGTGCAAAATGTTTTACAGCGTGATGGAGCAGATGAAGATGCT  
 CGACACGCTGCAGAACACGCACTAGATTAACCCTAGAAAGATAATCATATTGTGACGTACGTTAAAGATAATCATGCGTAAAATT  
 GACGCATGTGTTTTATCGTCTGTATATCGAGGTTATTTAATTTGAATAGATATTAAGTTTTATTATTTACACTTACATACTA  
 ATAATAAATTCAACAACAATTTATTTATGTTATTTATTTAATAAAAAACAAAACCTCAAAATTTCTTCTATAAAGTAAACAAAATT  
 TTATGAGGGACAGCCCCCCCCAAAGCCCCAGGGATGTAATACGTCCCTCCCCCGCTAGGGGGCAGCAGCGAGCCGCCCC  
 GGGCTCCGCTCCGGTCCGGCTCCCCCGCATCCCCGAGCCGGCAGCGTGCGGGACAGCCGGGCACGGGGAAGGTGG  
 CACGGGATCGTTTTCTTGAACGCTTCTCGTCTTTGAGCCTGCAGACACCTGGGGGATACGGGGAAAAGCCCTTTAA  
 GAAAACCGCACTTGTCCGGAAACCCGGGAATCTAACCCGGCTGAAGCGGATAGGAAGCCCTTCGATCTACATGATCAGG  
 TTTCCGGTGTTCGTCTTTCCACAAGATATATAAAGCCAAAGAAATCGAAATACTTTCAAGTTACGGTAAGCATATGATAGTCCATT  
 TTAACAATAATTTAAAAGTCAAACTACCAAGAAATTTACTTTCTACGTCACGATTTTTGACTAATATCTTTGTGTTACAG

TCAAATTAATTCTAATTATCTCTCTAACAGCCTTGTATCGTATATGCAAATATGAAGGAATCATGGGAAATAGGCCCTTCTCTGCC  
CAATCGACGAACCTTGTGGCCGTTTACCCTCTTAAGAAAAACCGCACTTGTCC**CGGAAACCCCGGGAATCTAACCCGGCTGAAGC**  
**GGATAGGAAGCCCTTCGATCTACATGATCAGTTTTCC**GGTGTTCGTCTTTCCACAAGATATATAAGCCAAGAAATCGAAAT  
ACTTTCAAGTTACGGTAAGCATATGATAGTCCATTTTAAAACATAATTTTAAAACACTGCAAACACTACCCAAGAAATATTACTTTCTACG  
TCACGTATTTTGTACTAATATCTTTGTGTTACAGTCAAATTAATTCTAATTATCTCTCTAACAGCCTTGTATCGTATATGCAAATAT  
GAAGGAATCATGGGAAATAGGCCCTTCTCTGCCCAATTCGGCAAGTTCTCCACCAGCCTCTTAAGAAAAACCGCACTTGTCC**CG**  
**GAAACCCCGGGAATCTAACCCGGCTGAAGCGGATAGGAAGCCCTTCGATCTACATGATCAGTTTTCC**GGTGTTCGTCTTT  
CCACAAGATATATAAGCCAAGAAATCGAAATCTGAAATACTTTCAAGTTACGGTAAGCATATGATAGTCCATTTTAAAACATAATTTTAAAAC  
TGCAAACACTACCCAAGAAATATTACTTTCTACGTACGTTATTTGTTACTAATATCTTTGTGTTTACAGTCAAATTAATTCTAATTATC  
TCTCTAACAGCCTTGTATCGTATATGCAAATATGAAGGAATCATGGGAAATAGGCCCTTCTCTGCCCAACTCTTAAGAAAAACCG  
GCACTTGTCCCTAAAACCGCACTTGTCC**CGGAAACCCCGGGAATCTAACCCGGCTGAAGCGGATAGGAAGCCCTTCGATCTA**  
**CATGATCAGTTTTCC**GGTGTTCGTCTTTCCACAAGATATATAAGCCAAGAAATCGAAATACTTTCAAGTTACGGTAAGCATAT  
GATAGTCCATTTTAAAACATAATTTTAAAACACTACCCAAGAAATTAATTACTTTTCTACGTACGTTATTTGTTACTAATATCTT  
TGTGTTTACAGTCAAATTAATTCTAATTATCTCTCTAACAGCCTTGTATCGTATATGCAAATATGAAGGAATCATGGGAAATAGGCC  
CTTCTCTGCCCAACCGGTTGCGATCGCTCCGGTGCCCGTCACT**GGGCAGAGCGCACATCGCCACAGTCCCGGAGAAGTTGG**  
**GGGGAGGGGTGGCAATTGAACGGGTGCCTAGAGAAGGTGGCGCGGGGTAAACTGGGAAAGTGATGTCGTGACTGGCTCCG**  
**CCTTTTTCCCGAGGGTGGGGGAGAACCGTATATAAGTGCAGTAGTCGCCGTGAACGTTCTTTTTCGCAACGGGTTTGCCGCCAG**  
**AACAGCTGAAGCTTCGAGGGGCTCGCATCTCTTACGCGCCCGCCGCTACCTGAGGCCCATCCACGCGGTTGA**  
**GTCCGCTTCTGCCGCTCCCGCTGTGGTGCCTCTGCTCCGCTGCGTCCGCGCTAGGTAAGTTTAAAGCTCAGGTCGAGACCG**  
**GGCCTTTGTCCGGCGCTCCCTTGAGCCTACCTAGACTCAGCCGGCTCTCCACGCTTTGCCTGACCCTGCTTGCTCAACTCTAC**  
**GTCTTTGTTTCTGTTTCTGTTCTGCGCCGTTACAGATCCAAGCTGTGACCGCGCCTACTCTACAGATAGCGTTTAAACTTACGCT**  
**TGCCACCATGGCTAGCGACTCAAAGGACGACGACGACAAGGACAAGAAGCCCTGAACACCTGATCAGCGCCACAGGACT**  
**GTGGATGTCAGAACCCGACCATCCACAAGATCAAGCACCACGAGGTGTCCCGTCCAAAATCTACATCGAGATGGCTCTG**  
**GCATGTCTGCCCTGTGCAAGCCTCTGCCAGCCCTGACCAAGTCCAGACCCGACCCGCTGGAAGTCTCTGAACCCAA**  
**GGACGAGATCAGCCTGAACAGCGGCAAGCCCTTCCGGGAGCTGGAAGCGAGCTGCTGAGCCGGGAAGAAGGACCTCC**  
**AGCAAATCTACGCCGAGGAACGGGAGAAGTACCTGGGCAAGCTGGAAGAGAGATCACCCGGTCTTCTGTTGACCGGGCT**  
**TCCTGGAATCAAGAGCCCATCTGATCCCTGGAGTACATCGAGCGGATGGGCATCGACAACGACCCGAGCTGAGCA**  
**AGCAGATTTCCGGGTGGACAAGAAGTCTGCTGCGGCCATGCTGGCCCCAACCTGTACAACACTCTGCGGAAACTGGA**  
**TCGCGCTTCTGCCGACCCCATCAAGATTTTCGAGATCGGCCCTGCTACCGGAAAGAGAGCGACGGCAAGAGCACCTGGA**  
**AGAGTTTACAATCTGAACCTTTTCCAGATGGGACGCGCTGACCCAGAGAGAAGCTGGAATCCATCATCACCAGCTTTCTGA**  
**ACCACCTGGGGATCGACTTCAAGATCGTGGGCGACAGCTGCATGGTGTACGGCGACACCCTGGACGTGATGCACGGCGACC**  
**TGGAAGTGTCTAGCGCCGCTGTTGGGACCCATCCCTTGGACCGGGAGTGGGGCATCGATAAGCCCTGGATCGGAGCCGGCT**  
**TCGGCTGGAACGGCTGCTGAAAGTCAAGCAGCACTTAAAGAATCAAGCGGGCTGCCAGAAGCGAGAGCTACTACAACG**  
**GCATCAGCAACCACTGTGATGATAAGGATCCACTAGTCCAGTGTGGTAATTGACATTGATTATTGACTATTATAATAGTA**  
**ATCAATACGGGGTCAATGTTTAAAGCCATATATGGAGTTCGCGGTTACATAACTTACGGTAAATGACCCCGCTGGCTGACCG**  
**CCCAACGACCCCGCCATTGACGTCAATAATGACGTATGTTCCCATAGTAACGCCAATAGGGACTTTCCATTGACGTCAATGGG**  
**TGGAGTATTTACGGTAAACTGCCCACTTGGCAGTACATCAAGTGTATCATATGCCAAGTACGCCCCCTATTGACGTCAATGACGG**  
**TAAATGGCCCGCCTGGCATTATGCCCAGTACATGACCTTATGGGACTTTCTACTTGGCAGTACATCTACGTATTAGTCATCGCT**  
**ATTACCATGGTTCGAGGTGAGCCCCACGTTCTGCTTCACTCTCCCATCTCCCCCTCCCAACCCCAATTTTGTATTTATTTAT**  
**TTTTAATTATTTGTGACGAGTATGGGGGCGGGGGGGGGGGGGGGGGGGGGGGGGGGGGGGGGGGGGGGGGGGGGGGGGGG**  
**GGCGGGGGGAGGCGGAGAGGTGCGGCGGCGAGCCAATCAGAGCGGCGCGCTCCGAAAGTTTCTTTTATGGCGAGGCGGGCGG**  
**CGGCGGCGGCCCTATAAAAAGCGAAGCGCGGGCGGGGGGGGAGTCCGCTGCGTTGCTTCCGCCCGTCCCGGCTCCGCGCC**  
**GCCTCGCGCGCCCGCCCGGGCTCTGACTGACCGCTTACTCCACAGGTGAGCGGGCGGGACCGCCCTTCTCTCCGGGGT**  
**GTAATTAGCGCTTGGTTAATGACGGCTCGTTTCTTTCTGTGGCTGCGTGAAGCCCTTAAAGGGCTCCGGGAGGGGCCCTTTGT**  
**CGGGGGGGGAGCGGCTCGGGGGTGCCTGCTGTGTGTGCTGCTGGGAGCGCCGCTGCGGCCCGCTGCGCCCGCGGCGG**  
**TGTGAGCGCTGCGGCGCGGGCGGGCTTTGTGCGCTCCGCTGTGCGCAGGGGAGCGCGCGGGGGGGGGGGGGGGGGGGGGGG**  
**CGGTGCGGGGGGGGCTGCGAGGGGAACAAAGGCTGCGTGCGGGGTGTGTGCGTGGGGGGGTGAGCAGGGGGGTGTGGGCGCG**  
**GCGGTGCGGCTGTAACCCCGCCCTGCACCCCGCTCCCGAGTTGCTGAGCACGGCCCGGCTTCCGGTGCGGGGCTCCGTACG**  
**GGGCGTGGCGCGGGGCTCGCCGTGCCGGGCGGGGGGTGGCGGCAGGTGGGGGTGCCGGGCGGGGGCGGGGCCCGCTCGGG**  
**CCGGGGAGGGCTCGGGGGAGGGGCGCGGCGGCCCGGAGCGCCGGCGGCTGTGAGGCGCGGCGAGCCGAGCCATTG**  
**CCTTTTATGGTAATCGTGCAGAGAGGGCGCAGGGACTTCTTTGTCCAAATCTGTGCGGAGCCGAAATCTGGGAGGCGCGCGG**  
**GCACCCCTCTAGCGGGCGCGGGGCGAAGCGGTGCGGCGCCGGCAGGAAGAAATGGGCGGGGAGGGCTTCTGTGCGTCCG**  
**CCGCGCGCGCTCCCTTCTCCCTCTCCAGCCTCGGGGCTGTCCGCGGGGGGACGGCTGCCTTCCGGGGGGACGGGGCAGG**  
**GCGGGGTTCCGGCTTCTGCGTGTGACCGCGGGCTCTAGAGCCTCTGCTAACCATGTTTCATGCCTTCTTCTTTTCTTCTACAGCTC**  
**CTGGGCAACGTCGTTATTGTGCTGTCTCATATTTTGGCAAAGAATTCGCCACCATGGT**GAGCAAGGGCGAGGAGGATAA****  
**CATGGCCATCATCAAGGAGTT**CATGCGCTTCAAGGTGCACATGGAGGGCTCCGTGAACGGCCACGATTCGAGATCGAGG****  
**CGAGGGCGAGGGCCGCCCTACGAGGGCACCCAGACCGCCAAGCTGAAGGTGACCAAGGGTGGCCCCCTGCCCTTCCGCT**  
**GGGACATCCTGTCCCTCAGTTCATGTACGGCTCCAAGGCCTACGTGAAGCACCCCGCGACATCCCGACTACTTGAAGCT**  
**GTCTTCCCGGAGGGCTTCAAGTGGGAGCGCGTGTGAACCTCAGGACGGCGCGTGGT**GACCGTACCCAGGACTCCTC****  
**CCTGCAGGACGGCGAGTTCATCTACAAGGTGAAGCTGCGCGGCACCACTTCCCTCCGACGGCCCCGTAATGCAGAAGAA**  
**GACCATGGGCTGGAGGGCTCTCCGAGCGGATGACCCCGAGGACCCCTGAAGGGCGAGATCAAGCGAGAGGCTGA**  
**AGCTGAAGGACGGCGCCACTACGACGCTGAGGTCAAGACCCTACAAGGCCAAGAAGCCGCTGCAGCTGCCCGGCGCT**  
**ACAACGTCAACATCAAGTTGGACATCACCTCCACAACGAGGACTACCCATCGTGAACAGTACGAACGCGCGGAGGGCC**  
**GCCACTCCACCGGGCGCATGGACGAGCTGTACGCGTCTGGAGGC**GCCACCAATTTAGCCTGCTGAAACAGGCTGGCGAGG****  
**TGGAAGAGAACCCTGGACCTGGACAAAAGTCCGTGAGCAAGGGCGAGGAGCTGTTACCCGGGGTGGTGGCCATCCTGGTCCG**  
**AGCTGAGCGCGACGTAACGGCCACAAGTT**CAGCGTGTCCGGCAGGGCGAGGGCGATGCCACCTACGGCAAGCTGACC****  
**CTGAAGTCTCTGACCCAGCCGCAAGCTGCCGTCCTGGCCACCCCTGCTGACCACCTGACCTACCGCGTGCAGTCTC**  
**TCAGCCGCTACCCCGACCACATGAAGCAGCAGACTTCTTCAAGTCCGCCATGCCGAAGGCTACGTCCAGGAGCGCACCAT**  
**CTTCTTCAAGGACGACGGCAACTACAAGACCCGCGCGGAGGTGAAGTTCGAGGGCGACACCCTGGTGAACCGCATCGAGCT**

GAAGGGCATCGACTTCAAGGAGGACGGCAACATCTGGGGCACAAAGCTGGAGTACAACACAGCCACAGGAGTCTATA  
 TCATGGCCGACAAGCAGAAGAACGGCATCAAGGTGAACCTTCAAGATCCGCCACAACATCGAGGACGGCAGCGTGCAGCTCG  
 CCGACCACTACCAGCAGAACACCCCATCGGGCAGCGCCCGTCTGCTGCTGCCGACAACCACTACCTGAGCACCCAGTCCG  
 CCCTGAGCAAAGACCCCAACGAGAAGCGCGATCACATGGTCTGCTGGAGTTCGTGACCGCCGCCGGGATCACTCTCGGCA  
 TGGACGAGCTGTACAAGTAA GAATTCCTCCTCAGGTGCAGGCTGCCTATCAGAAGGTGGTGGCTGGTGTGGCCAATGCCCTG  
 GCTCACAATACCACTGAGATCTTTTTCCCTCTGCCAAAAATATGGGGACATCATGAAGCCCTTGAGCATCTGACTTCTGGCTA  
 ATAAAGGAAATTTATTTTCATTGCAATAGTGTGTTGGAATTTTTGTGTCTCTCACTCGGAAGGACATATGGGAGGGGTCGACAAT  
 CAACCTCTGGATTACAAAATTTGTGAAAGATTGACTGGTATTCTTAACTATGTTGCTCCTTTTACGCTATGTGGATACGCTGCTTTA  
 ATGCCTTTGTATCATGCGTTAACTAACTTGTATTGAGCTTATAATGGTTACAAATAAAGCAATAGCATCACAATTTACAAAA  
 TAAAGCATTTTTTCTACTGCATTCTAGTTGTGGTTTGTCCAACTCATCAATGTATCTTATCATGTCTGGAATTGACTCAAATGATG  
 TCAATTAGTCTATCAGAAGCTATCTGGTCTCCCTTCCGGGGGACAAGACATCCCTGTTTAAATTTAAACAGCAGTGTTCCTCAAAC  
 TGGGTTCTTATCCCTTGTCTGGTCAACCAGGTTGCAGGGTTTCTGTCTCACAGGAACGAAGTCCCTAAAGAAACAGTGGC  
 AGCCAGTTTATAGCCCCGAAATTGACTGGATTCCCTTTTTAGGGCCCATTTGGTATGGCTTTTTCCCGTATCCCCCAGGTGCTG  
 CAGGCTCAAAGAGCAGCGAGAAGCGTTTCAAGAGAAAGCGATCCCGTGCCACCTTCCCCGTGCCCGGGCTGTCCCCGCACGCT  
 GCCGGCTCGGGGATGCGGGGGAGCGCCGACCGGAGCGGAGCCCCGGGCGGCTCGCTGCTGCCCCCTAGCGGGGGAGGG  
 ACGTAATTACATCCCTGGGGGCTTTGGGGGGGGGCTGTCCCTGATATCTATAACAAGAAAAATATATATAAATAGTTATCACGTA  
 AGTAGAACATGAAATAACAATATAATTCGTATGAGTTAAATCTTAAAAGTCACGTA AAAAGATAATCATGCGTCATTTTGACTCAC  
 GCGGTGCTTATAGTTCAAAATCAGTGACACTTACCGCATTGACAAGCAGCGCTCACGGGAGCTCCAAGCGCCGACTGAGATGTC  
 CTAATGCACAGCGACGGATTCCGCGCTATTTAGAAAGAGAGAGCAATATTTCAAGAATGCATGCGTCAATTTTACGCAGACTATC  
 TTTCTAGGGTTAATCTAGCTGCATCAGGATCATATCGTCCGGTCTTTTTTCCGGCTCAGTCATCGCCCAAGCTGGCGCTATCTGG  
 GCATCGGGGAGGAAGAAGCCCGTGCCTTTCCCGCAGGTTGAAGCGGCATGGAAAGAGTTTCCGAGGATGACTGCTGCTGC  
 ATTGACGTTGAGCGAAAACGCACGTTTACCATGATGATTCCGGGAAGGTGTGGCCATGCACGCCTTAAACGGTGAAGTGTTCGTT  
 CAGGCCACCTGGGATACCAGTTCGTCGCGGCTTTCCGGACACAGTTCGGATGGTCAGCCCCGAAGCGCATCAGCAACCCGAA  
 CAATACCGGCAGCAGCCGGAATGCTGCGGTTGCGAGTTAATGACAGCGGTGCGGCGCTGGGATTTACGTCAGCGAG  
 GACGGGTATCCTGGCTGGATGCCGAGAAAATGGACATGGATACCCCGTGAAGTACCCGGCGGGCGCGCTTGGCGTAATCATGG  
 TCATAGCTGTTTCTGTGTGAAATTGTTATCCGCTCACAATCCACACAACATACGAGCCGGAAGCATAAAGTGTAAAGCCTGGG  
 GTGCCTAATGAGTGAGCTAACTCACATTAATTGCGTTGCGCTCACTGCCCGCTTTCCAGTCGGGAAACCTGTGCTGCCAGCTGC  
 ATTAATGAATCGGCCAACCGCGCGGGGAGAGGCGGTTTTCGTTATGGGCGCTCTTCCGCTTCTCGCTCACTGACTCGTCTGCGC  
 TCGGTGTTCCGGCTGCGGCGAGCGGTATCAGCTCACTCAAAGCGGTAAATACGGTTATCCACAGAATCAGGGGATAACGCAGG  
 AAAGAACATGTGAGCAAAAAGGCCAGCAAAAAGGCCAGGAACCGTAAAAAGGCCGCTTGTGCGTTTTTCCATAGGCTCCGCC  
 CCCCTGACGAGCATCACA AAAATCGACGCTCAAGTCAGAGGTGGCGAAAACCCGACAGGACTATAAAGATACCAGGCGTTTTCCCC  
 CTGGAAGCTCCCTCGTGCCTCTCCTGTTCCGACCCTGCCGTTACCGGATACCTGTCCGCTTTCTCCCTTCGGGAAGCGTGG  
 CGTTTTCTCATAGCTCACGCTGTAGGTATCTCAGTTCGGTGTAGGTGCTTCCGCTCCAAGCTGGGCTGTGTGCACGAACCCCCCG  
 TTCAGCCGACCGCTGCGCTTATCCGGTAACATCGTCTTGTAGTCCAACCCGGTAAGACACGACTTATCGCCACTGGCAGCAG  
 CCACTGGTAACAGGATTAGCAGAGCGAGGTATGTAGGCGGTGCTACAGAGTTCTTGAAGTGGTGGCCCTAACTACGGCTACACTA  
 GAAGGACAGTATTTGGTATCTGCGCTCTGCTGAAGCCAGTTACCTTCGGA AAAAGAGTTGGTAGCTCTTGATCCGGCAAAACAAAC  
 CACCGCTGGTAGCGGTGGTTTTTTTTGTTTGAAGCAGCAGATTACGCGCAGAAAAAAGGATCTCAAGAAGATCCTTTGATCTTT  
 TCTACGGGGTCTGACGCTCAGTGAACGAAAACCTCACGTTAAGGGATTTTGGTCAATGAGATTATCAAAAAGGATCTTACCTAGA  
 TCCTTTTAAATTA AAAATGAAGTTTTAAATCAATCTAAAATATATAGTAAACTGGTCTGACAGTTACCAATGCTTAATCAGTGA  
 GGCACCTATCTCAGCGATCTGTCTATTTGTTTCATCCATAGTTGCCTGACTCCCCGTCGTGTAGATAACTACGATACGGGAGGGC  
 TTACCATCTGGCCCCAGTGCTGCAATGATACCGCGAGACCCACGCTCACCGGCTCCAGATTTATCAGCAATAAACCAGCCAGCC  
 GGAAGGGCCGAGCGCAGAAGTGGTCTGCAACTTTATCCGCTCCATCCAGTCTATTAATTGTTGCCGGGAAGCTAGAGTAAGT  
 AGTTCGCCAGTTAATAGTTTGCACAACGTTGTTGCCATTGCTACAGGCATCGTGGTGTACAGCTCGTCTGTTGGTATGGCTTCAT  
 TCAGCTCCGGTTCCCAACGATCAAGGCGAGTTACATGATCCCCATGTTGTGCAAAAAAGCGGTTAGCTCCTTCGGTCTCCGA  
 TCGTTGTCAGAAAGTTGGCCGAGTGTATCACTCATGGTTATGGCAGCACTGCATAATTTCTTACTGTCATGCCATCCGTA  
 AGATGCTTTTCTGTGACTGGTACTCAACCAAGTCAATTCTGAGAATAGTGTATGCGGCGACCGAGTTGCTCTTGCCCGGCGT  
 CAATACGGGATAATACCGCGCCACATAGCAGA ACTTTAAAAGTGTCTATCATTGAAAACGTTCTTCGGGGCGAAAACCTCTCAAG  
 GATCTTACCGCTGTTGAGATCCAGTTTCGATGTAACCCACTCGTGCACCCA ACTGATCTTCAGCATCTTTACTTTACCAGCGTTT  
 CTGGGTGAGCAAAAACAGGAAGGCAAAAATGCCGCAAAAAGGGGAATAAGGGCGACACGGAAATGTTGAATACTCAT

**2.2.19 Vector 74: 4x(Tyr tRNA<sub>CUA</sub>) TyrRS\* mCherry-P2A-eGFP(150TAG)**

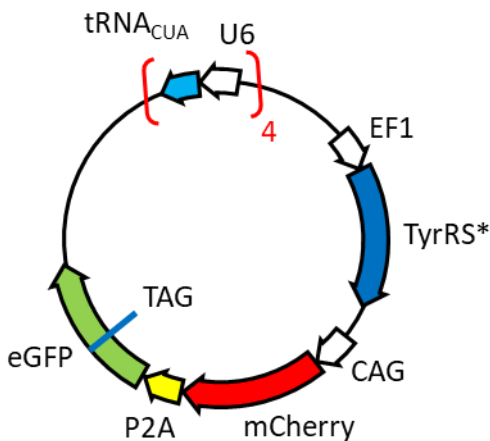

ACTCTTCTTTTTCAATATTATTGAAGCATTATCAGGGTTATTGTCTCATGAGCGGATACATATTTGAATGTATTGAAAAATAA  
 CAAATAGGGGTTCCGCGCACATTTCCCCGAAAAGTGCCACCTAAATTTGAAGCGTTAATATTTTGTAAAATTCGCGTTAAATTTTT  
 GTTAAATCAGCTCAATTTTTAACCAATAGGCCGAAATCGGCAAAAATCCCTTATAAATCAAAAAGAAATAGACCGAGATAGGGTTGAGT  
 GTTGTCCAGTTTGAACAAGAGTCCACTATTAAGAACGTGGACTCCAACGTCAAAGGGCGAAAAACCGTCTATCAGGGCGAT

GGCCCACTACGTGAACCATCACCTAATCAAGTTTTTTGGGGTCGAGGTGCCGTAAGCACTAAATCGGAACCCCTAAAGGGAGC  
CCCCGATTTAGAGCTTGACGGGGAAAGCCGGCGAACGTGGCGAGAAAGGAAGGGAAAGAAAGCGAAAGGAGCGGGCGCTAGGG  
CGCTGGCAAGTGTAGCGGTACAGCTGCGCGTAACCACCACACCCGCCGCGCTTAATGCGCCGCTACAGGGCGCGTCCCATTC  
GCCATTCAGGCTGCGCAACTGTTGGGAAGGGCGATCGGTGCGGGCCTCTTCGCTATTACGCCAGCTGGCGAAAGGGGGATGT  
GCTGCAAGGGGATTAAGTTGGGTAACGCCAGGGTTTTCCAGTCACGACGTTGTAACACGACGGCCAGTGAGCGCGCCTCGTT  
CATTACGTTTTTTGAACCCGTGGAGGACGGGCAGACTCGCGGTGCAAAATGTGTTTTACAGCGTGATGGAGCAGATGAAGATGCT  
CGACACGCTGCAGAACACGCAGCTAGATTAACCCTAGAAAGATAATCATATTGTGACGTACGTTAAAGATAATCATCGTAAAATT  
GACGCATGTGTTTTATCGTCTGTATATCGAGGTTTTATTTATTAATTTGAATAGATATTAAGTTTTATTATATTTACACTTACATACTA  
ATAATAAATTCAACAAACAATTTATTTATGTTTATTTATTTATTAATAAAAAACAAAACTCAAAATTTCTTCTATAAAAGTAACAAAACTT  
TTATGAGGGACAGCCCCCCCCAAAGCCCCAGGGATGTAATTACGTCCCTCCCCGCTAGGGGGCAGCAGCGAGCCGCCCG  
GGGCTCCGCTCCGGTCCGGCGCTCCCCCGCATCCCCGAGCCGGCAGCGTGCGGGGGACAGCCCGGGCACGGGGAAGGTGG  
CACGGGATCGCTTTCCTGAAACGCTTTCGCTGCTCTTTGAGCCTGCAGACACCTGGGGGGATACGGGGAAAGGGCCTTTAA  
GAAAAACCGCACTTGTCTGGTGGGGAAAGGATTCGAACCTTGAAGTCTGTGACGGCAGATTTAGAGTCTGCTCCCTTTGGCC  
GCTCGGGAACCCACC

GGTGTTCGTCCTTTCCACAAGATATATAAAGCCAAAGAAATCGAAATACTTTCAAGTTACGGTAAGCAT  
ATGATAGTCCATTTTAAAACATAATTTTAAAACGCAAACCTACCCAAGAAATTTACTTTCTACGTCACGTATTTTGTACTAATATC  
TTTGTGTTTACAGTCAAATTAATTCTAATTATCTCTCTAACAGCCTTGATCGTATATGCAAATATGAAGGAATCATGGAAATAGG  
CCCTCTTCCCTGCCAATCGACGAACTTGTGGCCGTTAACCTCTTAAGAAAAACCGCACTTGTCTGGTGGGGAAAGGATTCGAA  
CCTTGAAGTCTGTGACGGCAGATTTAGAGTCTGCTCCCTTTGGCCGCTCGGGAACCCACC

GGTGTTCGTCCTTTCCACAA  
GATATATAAAGCCAAAGAAATCGAAATACTTTCAAGTTACGGTAAGCATATGATAGTCCATTTTAAAACATAATTTTAAAACGCAA  
CTACCCAAGAAATTTACTTTCTACGTCACGTATTTTGTACTAATATCTTTGTGTTTACAGTCAAATTAATTCTAATTATCTCTCTAA  
CAGCCTTGTATCGTATATGCAAATATGAAGGAATCATGGAAATAGGCCCTTTCCTGCCAATTCGGCAAGTTCTCCACCAGCC  
TCTTAAGAAAAACCGCACTTGTCTGGTGGGGAAAGGATTCGAACCTTGAAGTCTGTGACGGCAGATTTAGAGTCTGCTCCCTT  
TGGCCGCTCGGGAACCCACC

GGTGTTCGTCCTTTCCACAAGATATAAAGCCAAAGAAATCGAAATACTTTCAAGTTACGGTAAGCAT  
AGCATATGATAGTCCATTTTAAAACATAATTTTAAAACGCAAACCTACCCAAGAAATTTACTTTCTACGTCACGTATTTTGTACTA  
ATATCTTTGTGTTTACAGTCAAATTAATTCTAATTATCTCTCTAACAGCCTTGATCGTATATGCAAATATGAAGGAATCATGGAA  
ATAGGCCCTTTCCTGCCAACCTCTTAAGAAAAACCGCACTTGTCCCTAAAACCGCACTTGTCTGGTGGGGAAAGGATTCGAA  
ACCTTGAAGTCTGTGACGGCAGATTTAGAGTCTGCTCCCTTTGGCCGCTCGGGAACCCACC

GGTGTTCGTCCTTTCCACA  
AGATATAAAGCCAAAGAAATCGAAATACTTTCAAGTTACGGTAAGCATATGATAGTCCATTTTAAAACATAATTTTAAAACGCAA  
ACTACCCAAGAAATTTACTTTCTACGTCACGTATTTTGTACTAATATCTTTGTGTTTACAGTCAAATTAATTCTAATTATCTCTCTA  
ACAGCCTTGTATCGTATATGCAAATATGAAGGAATCATGGAAATAGGCCCTTTCCTGCCAACCGGTTGCGATCGCTCCGGT  
GCCGCTCAGTGGGCAGAGCGCACATCGCCACAGTCCCGGAGAAGTTGGGGGGAGGGGTCCGGCAATTGAACGGGTGCCTAGA  
GAAGGTGGCGCGGGGTAAACTGGGAAAGTGATGTCGTGACTGGCTCCGCCTTTTTCCCGAGGGTGGGGGAGAACCCTATATA  
AGTGCAGTAGTCCGCGTGAACGTTCTTTTTCCGAACGGGTTTCCCGCCAGAACACAGCTGAAGCTTCGAGGGGCTGCATCTCT  
CCTTACGCGCCCGCCCTACCTGAGCCGCCATCCAGCCGGTGTAGTCCGCTTTCGCGCCTCCGCTCCGCTGTTGGTGCCT  
CCTGAAGTGCCTCCGCTAGGTAAAGTTAAAGCTCAGGTCAGGACGGCCGCTTTGTCGGGCTCCCTTTGGAGCCTACCTA  
GACTCAGCCGGCTCTCCACGCTTTCCTGACCCTGCTTGTCAACTCTACGCTTTTGTTCGTTTTCTGTTCTGCGCCGTTACAG  
ATCCAAGCTGTGACCGGCGCCTACTCTACAGATAGCGTTTAAACTTACGCTTGCACCATGGCTAGCGACTACAAGGACGACG  
ACGACAAGGCAAGCAGTAACCTTGATTAACAATTCGAAGAGCGGGGGCTGGTAGCCAGGTGACGGACGAGGAAGCGTTAG  
CAGAGCGACTGGCGAAGGCCCGCATCGCATCGTGTGGTCTCGATCTACCGCTGACAGCTTGCAATTTGGGCGATCTTGT  
CCATTGTTATCGTGAACGCTTCCAGCAGCGCCGCAAGCCGGTTGCGCTGGTAGGCGCGCAGCGGCTGATTGGT  
GACCCGAGCTTCAAAGCTGCCGAGCGTAAGCTGAACACCGAAGAACTGTTCAAGGAGTGGGTGGACAAAATCCGTAAGCAG  
GTTGCCCGTTCCTCGATTCGACTGTGGAGAAAACCTGCTATCGCGCCAATAATTATGACTGGTTCGGCAATATGAATGT  
GCTGACCTTCTGCGCGATATTGGCAAACACTTCTCCGTTAACAGATGATCAACAAAGAAGCGGTTAAGCAGCGTCTCAACC  
GTGAAGATCAGGGGATTTTCCTACTGAGTTTTCTACAACCTGCTGACGGGTTATAGTATGGCCTGTTGAACAAACAGTAC  
GGTGTGGTCTGCAAATTTGGTGTCTGACCAGTGGGTAACTCACTCTGTTATCGACTGACCTGACCTGCGTGCATCGAGAA  
TCAGGTGTTTGGCCTGACCGTTCGCTGATCACTAAGGACAGATGGCACCATAATTTGGTAAAACGAAAGCGCGCATCTGG  
TTGGATCCGAAGAAAACAGCCCGTACAAATTTCTACCAGTTCGGATCAACACTGCGCGTCCGACGTTTACCCTTCCGAA  
GTTCTTACCTTTATGAGCATTGAAGAGATCAACGCCCTGGAAGAAGAAGATAAAAACAGCGGTAAGCACCAGCGCGCCAG  
TATGACTGGCGGAGCAGGTGACTCGTCTGGTTCACGGTGAAGAAGGTTTACAGGCGGCAAAACGATTAACCGAATGCCTGT  
TCAGCGTCTTTGAGTGCCTGAGTGAAGCGGACTCGAACAGCTGGCGCAGGACGGCGTACCGTGGTGGTGGATGGGAAAA  
GGGCGCAGCTGATGCAGGCACTGGTCACTGAACTGCAACCTTCCCGTGGTCAAGCAGTAAAACATCGCCTCCAAT  
GCCATCACCATTAACGGTGA AAAACAGTCCGATCCTGAATACTTCTTTAAGAAGAAGATCGTCTGTTGGTCTGTTTTACCTTA  
CTGCGTCCGCGTAAAAGAATTACTGTCTGATTTGCTGGAAAGGGCCCGTTAA

TGATAAGGATCCACTAGTCCAGTGTGGTG  
GAATTGACATTGATTATTGACTAGTTATTAATAGTAATCAATACGGGGTCAATTAGTTCATAGCCCATATATGGAGTTCGCGGTTAC  
ATAACTTACGGTAAATGGCCCGCTGGCTGACCGCCCAACGACCCCGCCCATTTGACGTCAATAATGACGTATGTTCCCATAGT  
AACGCCAATAGGGACTTTCCATTGACGTCAATGGGTGGAGTATTTACGGTAAACTGCCACTTGGCAGTACATCAAGTGTATCAT  
ATGCCAAGTACGCCCCCTATTGACGTCAATGACGGTAAATGGCCCGCTGGCATTATGCCCAGTACATGACCTTATGGGACTTTT  
CTACTTGGCAGTACATCTACGTATTAGTCATCGCTATTACCATGGTCGAGGTGAGCCCCACGTTCTGCTTCACTCTCCCATCTC  
CCCCCTCCCTCCCAACCCCAATTTTGTATTTATTTTAAATTTTGTGTCAGCGATGGGGCGGGGGGGGGGGGGGGGGCGCG  
CGCCAGGCGGGGCGGGGCGGGGCGAGGGGCGGGGCGAGGCGGAGAGGTGCGGCGCGCAGCCAAATCAGAGCGGGCG  
GCTCCGAAAAGTTTCCCTTTATGGCGAGGCGGGCGGGCGGGCCCTATAAAAAGCCGAAGCGCGCGGGCGGGGAGTCTGCT  
GCGTTGCCCTTCCGCGCTGCCCGCTCCGCGCCGCTCGCGCCGCGCCCGGCTCTGACTGACCGCGTTACTCCACAGG  
TGAGCGGGCGGGACGGCCCTTCTCCTCCGGGCTGTAATTAGCGCTTGGTTAATGACGGCTCGTTTCTTTTCTGTGGCTGCGTG  
AAAGCCTTAAAGGGCTCCGGGAGGGCCCTTTGTGCGGGGGGAGCGGCTCGGGGGGTGCGTGCCTGTGTGTGCGTGGG  
AGCGCCGCTGCGGCCCGCGCTGCCCGCGGCTGTGAGCGCTGCGGGCGCGCGGGGCTTTGTGCGCTCCGCGGTGTC  
GCGAGGGGAGCGCGCGGGGGCGGTGCCCGCGGTGCGGGGGCTGCGAGGGGAACAAAGGCTGCTGCGGGGTGTG  
GCGTGGGGGGTGAGCAGGGGTGTGGCGCGGGCGGTGCGGCTTAACCCCGCTGCAACCCCTCCCGAGTTGCTGAG  
CACGGCCCGGCTTCGGGTGCGGGGCTCCGTACGGGGCGTGGCGCGGGGCTCGCGGTGCCGGGCGGGGGTGGCGGCAGGT  
GGGGGTGCCGGGCGGGGCGGGGCCGCTCGGGCCGGGAGGGCTCGGGGAGGGGCGCGCGGCCCGGAGCGCCGG  
CGGCTGTGAGGCGCGGCGAGCCGACGCACTTCTTTATGTTAATCGTGCGAGAGGGGCGCAGGGACTTCTTTGTCCAAA  
TCTGTGCGGAGCCGAATCTGGGAGCGCCCGCACCCCTTAGCGGCGGGGCGGAGCGGCGGGGCGGCGGAGG  
AGGAAATGGGCGGGAGGGGCTTCTGCTGCTGCGCGCCGCGGCTCCCTTCTCCTTCCAGCCTCGGGGCTGCGCGGG  
GGGACGGCTGCCTTCCGGGGGACGGGGCAGGGCGGGGTTGCGCTTCTGGCGTGTGACCGGCGGCTCTAGAGCCTCTGCTA  
ACCATGTTTATGCTTCTTTTCTTCTACAGCTCCTGGCAACGTGCTGGTTATTGTGCTGTCTCATATTTGGCAAAGAATTC

GCCACCATGGTGAGCAAGGGCGAGGAGGATAACATGGCCATCATCAAGGAGTTTCATGCGCTTCAAGGTGCACATGGAGGGC  
TCCGTGAACGGCCACGAGTTCGAGATCGAGGGCGAGGGCGAGGGCCGCCCTACGAGGGCACCCAGACCGCCAAGCTGAA  
GGTGACCAAGGGTGGCCCCCTGCCCTTCGCTGGGACATCTGTCCCCTCAGTTCATGTACGGCTCCAAGGCTACGTGAAG  
CACCCCGCCGACATCCCCGACTACTTGAAGCTGTCTTCCCCGAGGGCTTCAAGTGGGAGCGCGTGATGAACTTCGAGGACG  
GCGGCGTGGTGACCGTGACCCAGGACTCCTCCCTGCAGGACGGCGAGTTCATCTACAAGGTGAAGCTGCGCGGCACCAACT  
TCCCCTCCGACGGCCCCGTAATGCAGAGAAGACCATGGGCTGGGAGGCCCTCCTCCGAGCGGATGTACCCCGAGGACGGCG  
CCCTGAAGGGCGAGATCAAGCAGAGGCTGAAGCTGAAGGACGGCGGCCACTACGACGCTGAGGTCAAGACCACCTACAAG  
GCCAAGAAGCCCGTGCAGCTGCCCGGCGCCTACAACGTCAACATCAAGTTGGACATCACCTCCCACAACGAGGACTACACC  
ATCGTGAACAGTACGAACGCGCCGAGGGCGCCACTCCACCGCGGCATGGACGAGCTGTACGCGTCTGGAGGCGCCAC  
CAATTTACGCTGTGAAACAGGCTGGGACGTGGAAGAGAACCCTGGACCTGGACAAAAGTCGGTGAGCAAGGGCGAGGA  
GCTGTTACCCGGGGTGGTGCCATCCTGGTCGAGCTGGACGGCGACGTAAACGGCCACAAGTTACGCGTGTCCGGCGAGGG  
CGAGGGCGATGCCACCTACGGCAAGCTGACCTGAAGTTTCATCTGCACCAACGGCAAGCTGCCCGTCCCTGGCCACCCT  
CGTGACCCTGACCTACGGCGTGCAGTCTCAGCCGTACGCCCTACCCACCACATGAAGCAGCACGACTTCTTCAAGTCCGCC  
ATGCCGAAGGCTACGTCCAGGAGCGCACCATCTTCTTCAAGGACGACGGCAACTACAAGACC CGCGCCGAGGTGAAGTTC  
GAGGGCGACACCCTGGTGAACCGCATCGAGCTGAAGGGCATCGACTTCAAGGAGGACGGCAACATCCTGGGGCACAAGCTG  
GAGTACAACATAACAGCCACTAGTCTATATCATGGCCGACAAGCAGAAGAACGGCATCAAGGTGAATTC AAGATCCGCC  
ACAACATCGAGGACGGCAGCGTGCAGCTCGCCGACCACACTACCAGCAAGAACCCCATCGGCGACGGCCCCGTGCTGCTGC  
CCGACAACCACTACCTGAGCACCCAGTCCGCCGTGACCAAGACCCCAAGAGAGCGCGATCATGCTGCTGGAGT  
TCGTGACCGCCCGGGATCACTCTCGGCATGGACGAGCTGTACAAGTAA GAATTC ACTCCTCAGGTGCAGGCTGCCTATCAG  
AAGGTGGTGGCTGGTGTGGCCAATGCCCTGGCTCACAAATACCACTGAGATCTTTTTCCCTCTGCCAAAAATTATGGGGACATCA  
TGAAGCCCCTTGAGCATCTGACTTCTGGCTAATAAAGGAAATTTATTTTCATTGCAATAGTGTGTTGGAATTTTTGTGTCTCTCAC  
TCGGAAGGACATATGGGAGGGGTGCACAATCAACCTCTGGATTACAAAATTTGTGAAAGATTGACTGGTATTCTTAACTATGTTG  
CTCCTTTTACGCTATGTGGATAACGCTGCTTTAATGCCTTTGTATCATGCGTTAACTAACTGTTTATTGACGCTTATAATGGTTAC  
AAATAAAGCAATAGCATCACAAATTTCAAAATAAAGCAATTTTTCACTGCATTCATAGTTGTGGTTGTCCAAACTCATCAATGTAT  
CTTATCATGTCTGGAATTGACTCAAATGATGTCAATTAGTCTATCAGAAGCTATCTGGTCTCCCTTCCGGGGGACAAGACATCCCT  
GTTTAAATTTAAACAGCAGTGTTCCAAACCTGGGTTCTTATATCCCTTGTCTGGTCAACCAGGTTGCAGGGTTTTCTGTCTCA  
CAGGAACGAAGTCCCTAAGAAACAGTGGCAGCCAGTTTTAGCCCCGGAATTGACTGGATTCTTTTTTAGGGCCATTGGTAT  
GGCTTTTTCCCGTATCCCCCAGGTGTCTGCAGGCTCAAAGAGCAGCGAGAAGCGTTAGAGGAAAGCGATCCCGTGCCACC  
TCCCCGTGCCGGGGCTGTCCCGCACGCTGCCGGCTCGGGGATGCGGGGGAGCGCCGACCCGAGCGGAGCCCCGGGGC  
GGCTCGCTGCTGCCCCCTAGCGGGGGAGGGACGTAATTACATCCCTGGGGGCTTTGGGGGGGGGCTGTCCCTGATATCTATAA  
CAAGAAAATATATATAATAAGTTATCAGTAAGTAGAACATGAAATAACAATATAATTATCGTATGAGTTAAATCTTAAAAGTCAC  
GTAAGATAATCATGCGTCATTTTACTCACGCGGTGTTATAGTTCAAATCAGTGACACTTACCGCATTGACAAGCACGCTC  
ACGGGAGCTCCAAGCGGGGACTGAGATGTCTTAAATGCACAGCGACGGATTTCGCGCTATTTAGAAAGAGAGCAATATTTCAA  
GAATGCATGCGTCAATTTTACGCGACTATCTTTCTAGGGTTAATCTAGCTGCATCAGGATCATATCGTCGGGTCTTTTTCCGGC  
TCAGTCATCGCCCAAGCTGGCGTATCTGGGCATCGGGGAGGAAGAACGCCGTGCCCTTTCCCGCAGGTTGAAGCGGATGG  
AAAGAGTTTGGCGAGGATGACTGCTGCTGCATTGACGTTGAGCGAAAACGCACGTTTACCATGATGATTCCGGAAAGGTGTGGCC  
ATGCACGCCTTAAACGGTGAAGTTCGTTACAGGCCACCTGGGATACCAGTTCGTCGCGGCTTTCCCGACACAGTTCGGGATG  
GTCAGCCCCGAAGCGCATCAGCAACCCGAACAATACCGGGCAGACCCGGAAGTCCCGTCCCGGTGTGCAGATTAATGACAGCGG  
TGCGGCGCTGGGATATTACGTCAGCGAGGACGGGTATCCTGGCTGGATGCCGCAGAAATGGACATGGATACCCCGTGAGTTAC  
CCGGCGGGCGCGCTTGGCGTAATCATGGTCATAGCTGTTTCTGTGTGAAATTTGTTTCCGCTCACAAATCCACACAACATACGA  
GCCGGAAGCATAAAGTGTAAGCCTGGGGTGCCTAATGAGTGAGCTAACTCACATTAATTGCGTTGCGCTCACTGCCCGCTTTC  
CAGTCGGGAAACCTGTCTGTGCCAGCTGCATTAATGAATCGGCCAACGCGCGGGGAGAGGGCGTTTGGCTATTGGGCGCTCTTC  
CGCTTCTCGCTCACTGACTCGCTGCGCTCGGTGTTCCGGCTGCGGGCAGCGGTATCAGCTCAAAAGGCGGTAATACGGT  
TATCCACAGAATCAGGGGATAACGCAGGAAAGAATGTGAGCAAAAGGCCAGCAAAAGGCCAGGAACCGTAAAAAGGCCGCG  
TTGCTGGCCTTTTTCCATAGGCTCCGCCCTGACGAGCATCACAAAAATCGACGCTCAAGTCAGAGGTGGCGAAACCCGACA  
GGACATAAAGATACCAGGCGTTTTCCCCCTGGAAGCTCCCTCGTGCCTCTCCTGTTCCGACCCTGCCGCTTACCGGATACCTG  
TCCGCTTTCTCCCTTCGGGAAGCGTGGCGCTTTCTCATAGCTCACGCTGTAGGTATCTCAGTTCCGGTGTAGGTGCTTCCGCTC  
AAGCTGGGCTGTGTGCACGAACCCCGCTTACGCCGACCGCTGCGCCTTATCCGTAACATATCGTCTTGAGTCCAACCCGGTA  
AGACACGACTTATCGCCACTGGCAGCAGCCACTGGTAACAGGATTAGCAGAGCGAGGTATGTAGGGCGGTGCTACAGAGTTCTTG  
AAGTGGTGGCCTAACTACGGCTACACTAGAAGGACAGTATTTGGTATCTGCGCTGCTGTAAGCCAGTTACCTTCGGAAAAAGA  
GTTGGTAGCTCTTGATCCGGCAAAACAAACCACCGCTGGTAGCGGTGTTTTTTTTTTGTTTGAAGCAGCAGATTACGCGCAGAAAAA  
AAGGATCTCAAGAAGATCCTTTGATCTTTTCTACGGGGTCTGACGCTCAGTGAACGAAAACCTCACGTTAAGGGATTTTGGTCA  
GAGATTATCAAAAAGGATCTTACCTAGATCCTTTTAAATTAATAAAGTAAATCAATCTAAAGTATATATGAGTAAACTTGG  
TCTGACAGTTACCAATGCTTAATCAGTGAGGCACCTATCTCAGCGATCTGTCTATTTTCGTTTCATCCATAGTTGCCTGACTCCCCGT  
CGTGTAGATAACTACGATACGGGAGGGCTTACCATCTGGCCCCAGTGTGCAATGATACCGCGAGACCCACGCTCACCGGCTC  
CAGATTTATCAGCAATAAACACAGCCAGCCGGAAGGGCCGAGCGAGAAGTGGTCCCTGCAACTTTATCCGCCTCCATCCAGTCTA  
TTAATTGTTGCGGGGAAGCTAGAGTAAGTAGTTCCGCCAGTTAATAGTTTGGCAACGTTGTTGCCATTGCTACAGGCATCGTGGT  
GTCACGCTCGTCTTTGGTATGGCTTCATCAGCTCCGGTCCCAACGATCAAGGCGAGTTACATGATCCCCATGTTGTGCAAA  
AAAGCGGTTAGCTCCTTCGGTCCCTCCGATCGTTGTGAGAAGTAAGTTGGCCGAGTGTATCACTCATGTTATGGCAGCACTG  
CATAATCTCTTACTGTCAATGCCATCCGTAAGATGCTTTTTCTGTGACTGGTGAGTACTCAACCAAGTCAATCTGAGAATAGTGTAT  
GCGGCGACCGAGTTGCTCTTTCGCCGCGTCAATACGGGATAATACCGCGCACATAGCAGAACTTTAAAAGTGTCTCATCTTTGG  
AAAACGTTCTTCGGGGCGAAAACCTCAAGGATCTTACCCTGTTGAGATCCAGTTTCGATGTAACCCACTCGTGCACCCAACCTGA  
TCTTCAGCATCTTTTACTTTACCAGCGTTTCTGGGTGAGCAAAAACAGGAAGGCAAAATGCCGCAAAAAAGGGAATAAGGGCGA  
CACGGAAATGTTGAATACTCAT
