# Supplementary material for: Development of mammalian cell logic gates controlled by unnatural amino acids
Source: PubMed Central journal article supplement (PMC9017196; doi:10.1016/j.crmeth.2021.100073), 2021-09-16
Supplement: mmc2.pdf [file mmc2.pdf]

# Development of mammalian cell logic gates controlled by unnatural amino acids

## Graphical abstract

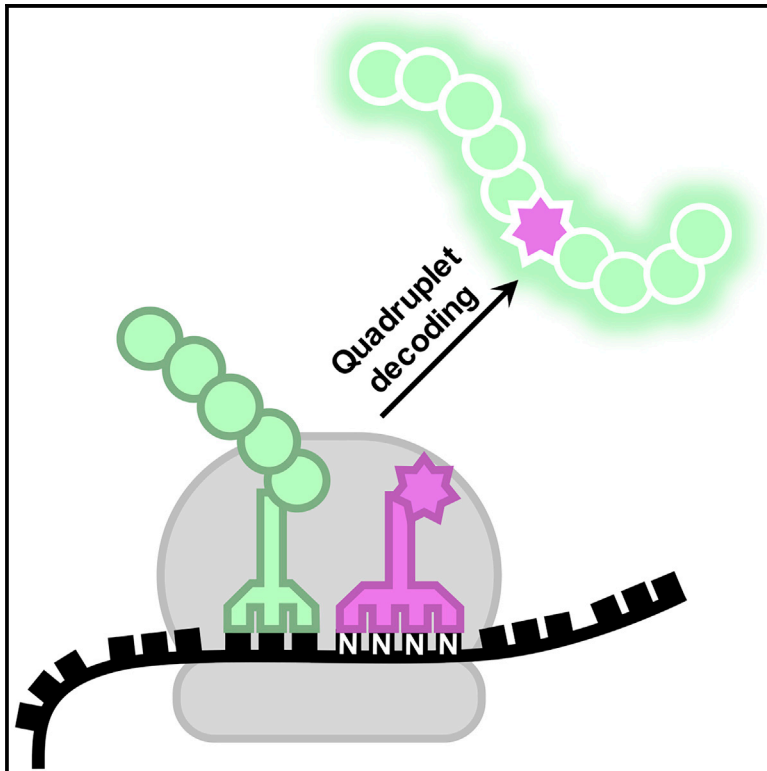

## Authors

Emily M. Mills, Victoria L. Barlow,  
Arwyn T. Jones, Yu-Hsuan Tsai

## Correspondence

tsai.y-h@outlook.com

## In brief

Logic gates enable regulation of protein function by small molecules, but these are often drug(-like) molecules with intrinsic biological activities. Mills et al. present an alternative approach through genetic code expansion, demonstrating that unnatural amino acids can act as biologically inert switches for effective mammalian cell logic operations.

## Highlights

- We evaluate the performance of 11 quadruplet-decoding tRNAs in HEK293
- Two tRNAs show high efficiency in decoding quadruplet codons
- We construct logic gates responding to two different unnatural amino acids
- These findings present an alternative approach to mammalian cell logic operations

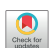

## Article

# Development of mammalian cell logic gates controlled by unnatural amino acids

Emily M. Mills,<sup>1,4</sup> Victoria L. Barlow,<sup>1,4</sup> Arwyn T. Jones,<sup>2</sup> and Yu-Hsuan Tsai<sup>1,3,5,\*</sup><sup>1</sup>School of Chemistry, Cardiff University, Main Building, Park Place, Cardiff, Wales CF10 3AT, UK<sup>2</sup>School of Pharmacy and Pharmaceutical Sciences, Cardiff University, Redwood Building, Cardiff, Wales CF10 3NB, UK<sup>3</sup>Institute of Molecular Physiology, Shenzhen Bay Laboratory, Shenzhen, Guangdong 518132, China<sup>4</sup>These authors contributed equally<sup>5</sup>Lead contact\*Correspondence: [tsai.y-h@outlook.com](mailto:tsai.y-h@outlook.com)<https://doi.org/10.1016/j.crmeth.2021.100073>

**MOTIVATION** Genetic code expansion employing an orthogonal aminoacyl-tRNA synthetase/tRNA pair for site-specific unnatural amino acid incorporation has a wide range of applications. However, a blank (orthogonal) codon is needed for each orthogonal tRNA. Although the amber stop codon is commonly used as the blank codon, the use of stop codons as the blank codons inevitably limits the number of possible different unnatural amino acids to be incorporated into proteins in a single cell. To overcome this limitation, we evaluated the capability of 11 Pyl tRNA variants for decoding quadruplet codons in mammalian cells. With efficient quadruplet-decoding orthogonal tRNA variants available, it is possible for simultaneous incorporation of more than three different unnatural amino acids in mammalian cells.

## SUMMARY

Mammalian cell logic gates hold great potential for wide-ranging applications. However, most of those currently available are controlled by drug(-like) molecules with inherent biological activities. To construct truly orthogonal circuits and artificial regulatory pathways, biologically inert molecules are ideal molecular switches. Here, we applied genetic code expansion and engineered logic gates controlled by two biologically inert unnatural amino acids. Genetic code expansion relies on orthogonal aminoacyl-tRNA synthetase/tRNA pairs for co-translational and site-specific unnatural amino acid incorporation conventionally in response to an amber (UAG) codon. By screening 11 quadruplet-decoding pyrrolysyl tRNA variants from the literature, we found that all variants decoding CUAG or AGGA tested here are functional in mammalian cells. Using a quadruplet-decoding orthogonal pair together with an amber-decoding pair, we constructed logic gates that can be successfully controlled by two different unnatural amino acids, expanding the scope of genetic code expansion and mammalian cell logic circuits.

## INTRODUCTION

Logic gates refers to integrated systems where an input controls a desired output. Employing logic gates in mammalian cells is a fast-developing area for intricate reversible cellular control, with significant biotechnological and biomedical applications (Cuthbertson and Nodwell, 2013; Fink et al., 2019; Nguyen et al., 2016; Ross et al., 2016; Wu et al., 2015; Zetsche et al., 2015). Some examples include novel sensors, diagnostics, as well as therapeutics (Brown et al., 2018; Kitada et al., 2018; Scheller and Fussenegger, 2019; Singh, 2014; Zhou et al., 2020). In particular, logic gates responding to small molecules can provide (spatio)temporal control by the user, permitting targeted manipulation of a designated phenotype. Specifically, biologically inert molecules that have no influence on endogenous

cellular events are ideal molecular switches to control logic gates, therefore enabling the construction of truly orthogonal circuits and artificial regulatory pathways in cells.

We hypothesized that this can be realized by using biologically inert unnatural (non-canonical) amino acids, which are artificial synthetic molecules and do not produce observable phenotypes or toxicities *in vitro* or *in vivo* (Chen et al., 2017; Han et al., 2017; Krogager et al., 2018; Liu et al., 2017; Suzuki et al., 2018). More importantly, such unnatural amino acids can be site-specifically incorporated into proteins in mammalian cells by repurposing the cellular translational machinery through the technique of genetic code expansion (Figure 1). This technique has wide-ranging applications in protein research (Chin, 2017; de la Torre and Chin, 2021; Dumas et al., 2015; Huang and Liu, 2018; Kato, 2019; Neumann-Staubitz and Neumann, 2016; Nodling et al.,

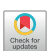

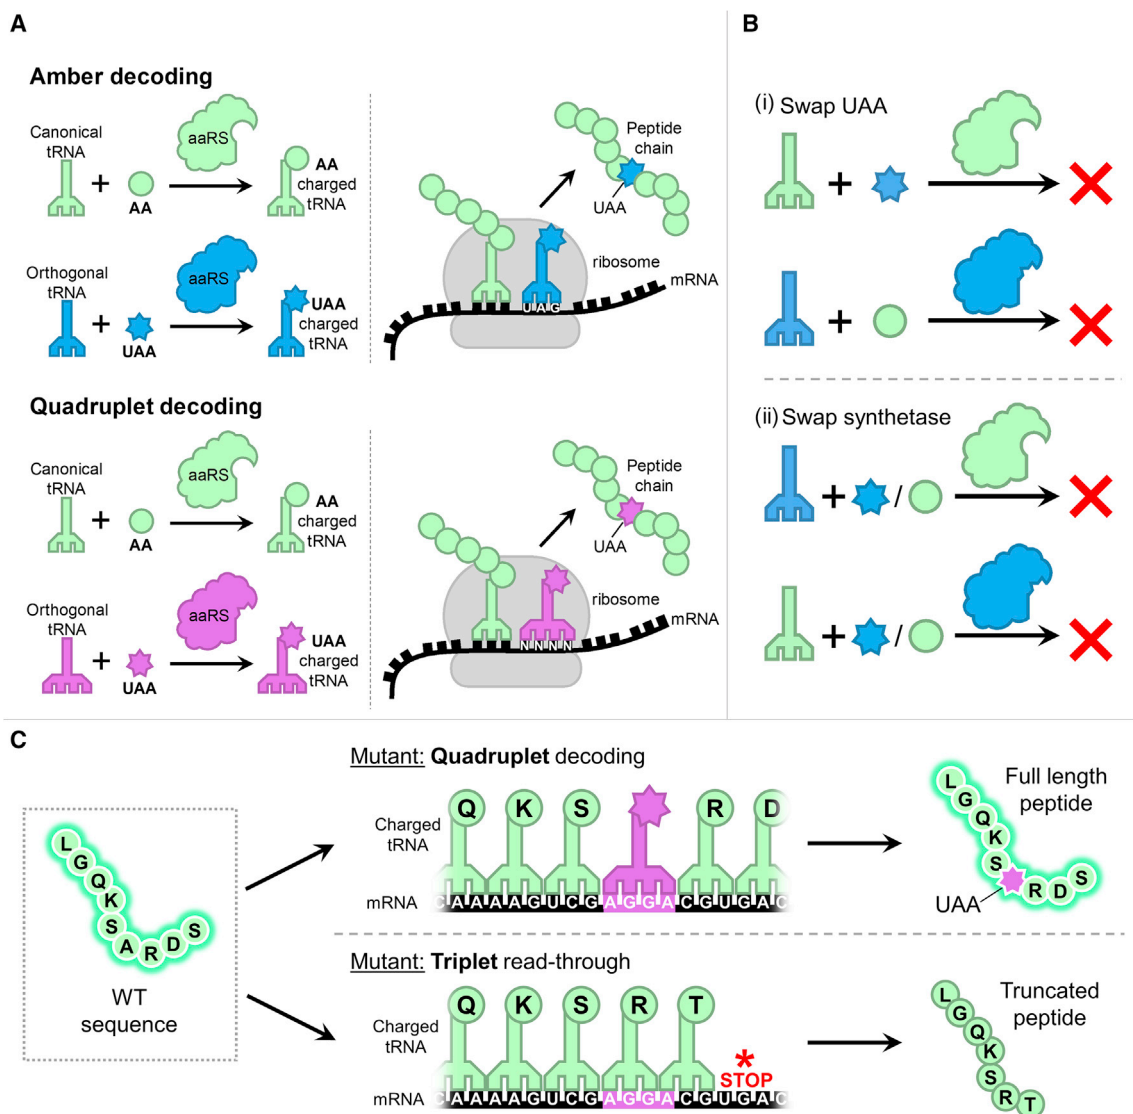

**Figure 1. Principles of unnatural amino acid incorporation by genetic code expansion**

(A) Amber and quadruplet suppression. Charged tRNA molecules are generated by aminoacylation of tRNA molecules by their respective synthetases with the respective amino acid or unnatural amino acid. Charged tRNA molecules then enter the ribosome and interact with the complementary codon on the mRNA template before formation of the peptide bond with the brought-in amino acid. Abbreviations are as follows: AA, amino acid; UAA, unnatural amino acid.

(B) Graphical representation of aaRS/tRNA pair orthogonality: (i) aaRS can only charge their paired tRNA with the respective amino acid, supplementation of a different amino acid results in no aminoacylation of tRNA; (ii) tRNA can only be aminoacylated by their respective aaRS, regardless of amino acid supplementation.

(C) Principles imposed when using quadruplet decoding. Alongside the introduction of the quadruplet codon to the gene, a further point mutation is introduced downstream to the codon to ensure that, if the first three bases of the quadruplet are translated by the canonical triplet tRNA, an in-frame stop codon is generated downstream to the incorporation site enabling premature truncation. Moreover, if the quadruplet is correctly decoded, this point mutation remains silent and does not alter the overall amino acid sequence of the protein.

2019), including the proposed use of unnatural amino acids as logic gate inputs. To incorporate an unnatural amino acid into a protein during translation, an orthogonal aminoacyl-tRNA synthetase (aaRS)/tRNA pair that selectively decodes a blank codon is required. The amber stop codon (UAG) is often used as the blank codon because it does not encode an amino acid and is the rarest codon in many organisms (Ivanov et al., 2001). The use of the amber codon to encode an unnatural amino acid is

known as amber suppression (Figure 1A). To date, various amber suppressor orthogonal pairs have been developed (Chin, 2017; Dumas et al., 2015; Huang and Liu, 2018; Neumann-Staubitz and Neumann, 2016; Nodling et al., 2019). Within prokaryotic and eukaryotic systems, pyrrolysyl (Pyl)-tRNA synthetase (PylRS) and its cognate tRNA from the archaeal *Methanosarcina* species is arguably one of the most widely utilized and developed orthogonal pairs for unnatural amino acid

incorporation. Nevertheless, various *Escherichia coli* aaRS enzymes (e.g., *EcLeuRS*, *EcTyrRS*, *EcTrpRS*) and their cognate tRNAs have also been exploited and specifically engineered to function as amber suppressor orthogonal pairs in mammalian cells. It is possible to employ several orthogonal pairs for simultaneous incorporation of multiple unnatural amino acids in a single mammalian cell (Meineke et al., 2018, 2020; Xiao et al., 2013; Zheng et al., 2017, 2018). However, such applications are often thwarted as these orthogonal pairs were originally engineered for amber decoding. To attain site-specific incorporation of multiple unnatural amino acids within a single cell, orthogonal pairs need to decode unique blank codons and have no crossover interactions (Figure 1B). An emerging strategy to generate additional blank codons is to use quadruplet (four-base) codons. Employing quadruplet codons can greatly expand the genetic code, providing the possibility for simultaneous incorporation of three or more distinct unnatural amino acids within a single cell (Dunkelmann et al., 2020).

Indeed, quadruplet decoding has been well-explored in *E. coli* (de la Torre and Chin, 2021; Moore et al., 2000; Neumann et al., 2010; O'Connor, 2002; Wang et al., 2014; Wang et al., 2016; Willis and Chin, 2018), including a recent example demonstrating simultaneous incorporation of three different unnatural amino acids (Dunkelmann et al., 2020). However, quadruplet decoding in mammalian cells is still largely unexplored and remains in its infancy (Anderson et al., 2004; Chen et al., 2018; Niu et al., 2013; Taki et al., 2006).

Here, we recognized the potential applications of genetic code expansion in the development of orthogonal logic circuits and engineered novel AND and OR logic gates that can be controlled by two distinct unnatural amino acids. As this proposed system design required two mutually orthogonal aaRS/tRNA pairs to respond to the logic inputs, we set out to identify a quadruplet-decoding aaRS/tRNA pair that is orthogonal to an amber-decoding aaRS/tRNA pair in mammalian cells. Specifically, we investigated the quadruplet-decoding efficiency of 11 Pyl tRNA<sub>xxxx</sub> variants previously tested in *E. coli* and found that all selected variants decoding AGGA (Niu et al., 2013; Wang et al., 2014) or CUAG (Wang et al., 2014) were functional in human embryonic kidney (HEK293) cells, whereas none of the tested variants were able to decode UAGN codons efficiently. We then confirmed the orthogonality of an amber-decoding pair to an AGGA-decoding PylRS/tRNA pair, enabling incorporation of two different unnatural amino acids in the same mammalian cell. After a series of system optimizations, we constructed AND and OR logic gates by using a split GFP reporter assay. To the best of our knowledge, this is the first example exploiting genetic code expansion in mammalian cell logic gates. This study not only expands the applications of genetic code expansion but also provides an alternative approach to engineer mammalian cell logic circuits.

## RESULTS

### Quadruplet-decoding analysis

Pyl tRNA variants that can decode UAGN (N = A/U/C/G), CUAG, or AGGA codons have been engineered for unnatural amino acid incorporation in *E. coli* (Chen et al., 2018; Niu et al., 2013; Wang

et al., 2014, 2016). However, the translation machineries in *E. coli* and mammalian cells are different (Melnikov et al., 2018), thus tRNA optimized in one system might not work well in the other. In light of this, we evaluated the performance of 11 quadruplet-decoding Pyl tRNA variants in mammalian cells (Figure 2A). These tRNA variants consisted of the simple replacement of the CUA anticodon to NCUA (for decoding UAGN), CUAG (for decoding CUAG), or UCCU (for decoding AGGA), as well as previously identified tRNA variants that were evolved in *E. coli* and carry additional mutations in the anticodon stem loop. Pyl tRNA<sub>UCUA(EV1)</sub>, Pyl tRNA<sub>CUAG(EV1)</sub>, and Pyl tRNA<sub>UCCU(EV1)</sub> were chosen for their high decoding efficiency in *E. coli* (Wang et al., 2014), whereas Pyl tRNA<sub>UCUA(EV2)</sub> (Chen et al., 2018) and Pyl tRNA<sub>UCCU(EV2)</sub> (Niu et al., 2013) have been used for unnatural amino acid incorporation in mammalian cells.

*Nε*-Boc-L-lysine (BocK) (Figure 2B) is a substrate of the wild-type PylRS (Yanagisawa et al., 2008). To perform a systematic comparison, we constructed dual-fluorescence reporters (Figure 2C) encoding the wild-type *Methanosarcina mazei* PylRS, a Pyl tRNA variant and an mCherry-P2A-eGFP(150XXXX) reporter, where the 150<sup>th</sup> amino acid residue in eGFP corresponds to a quadruplet codon. P2A is a self-cleavage sequence, leaving only a Pro residue in the C-terminal fragment after cleavage (Kim et al., 2011). In this reporter, mCherry is produced constitutively and thus serves as the transfection control. On the other hand, green fluorescence will only be observed upon successful decoding of the quadruplet codon and production of full-length eGFP. If the first three bases of a quadruplet codon are decoded as a triplet codon, this will lead to a translational frameshift and premature termination (Figure 1C). Thus, quadruplet-decoding efficiency can be calculated from the ratio between the two fluorescence intensities in the presence and absence of BocK (Bartoschek et al., 2021; Gautier et al., 2010; Monk et al., 2017; Potts et al., 2020; Schmied et al., 2014).

Experimentally, HEK293 cells were transiently transfected with a reporter vector (Figure 2C) and cultured in the presence or absence of 1 mM BocK, followed by flow cytometry analysis. Interestingly, in contrast to the observations in *E. coli* where all variants can decode the corresponding quadruplet codon (Niu et al., 2013; Wang et al., 2014, 2016), only Pyl tRNA variants decoding CUAG or AGGA appear to be functional (Figure 2D). Particularly, Pyl tRNA<sub>CUAG</sub> and Pyl tRNA<sub>UCCU(EV2)</sub> outperformed the other variants, and the functional Pyl tRNA variants remained orthogonal in mammalian cells, manifesting as a lack of detectable eGFP in the absence of BocK by flow cytometry, fluorescence microscopy, or immunoblotting (Figures 2E and S1). Interestingly, a higher production of eGFP was observed with Pyl tRNA<sub>UCCU(EV2)</sub> compared with Pyl tRNA<sub>CUAG</sub> when using a single fluorescence eGFP(150XXXX) reporter (Figure S1), although these findings could be due to a higher translation frequency or better transfection efficiency of the vector. Nevertheless, we chose to use tRNA<sub>UCCU(EV2)</sub> for subsequent experiments.

### Identification of a second orthogonal pair

To utilize genetic code expansion to control logic gate inputs, two orthogonal aaRS/tRNA pairs that selectively incorporate different unnatural amino acids are required. Several *E. coli* aaRS enzymes (e.g., *EcTyrRS*) and their cognate tRNA

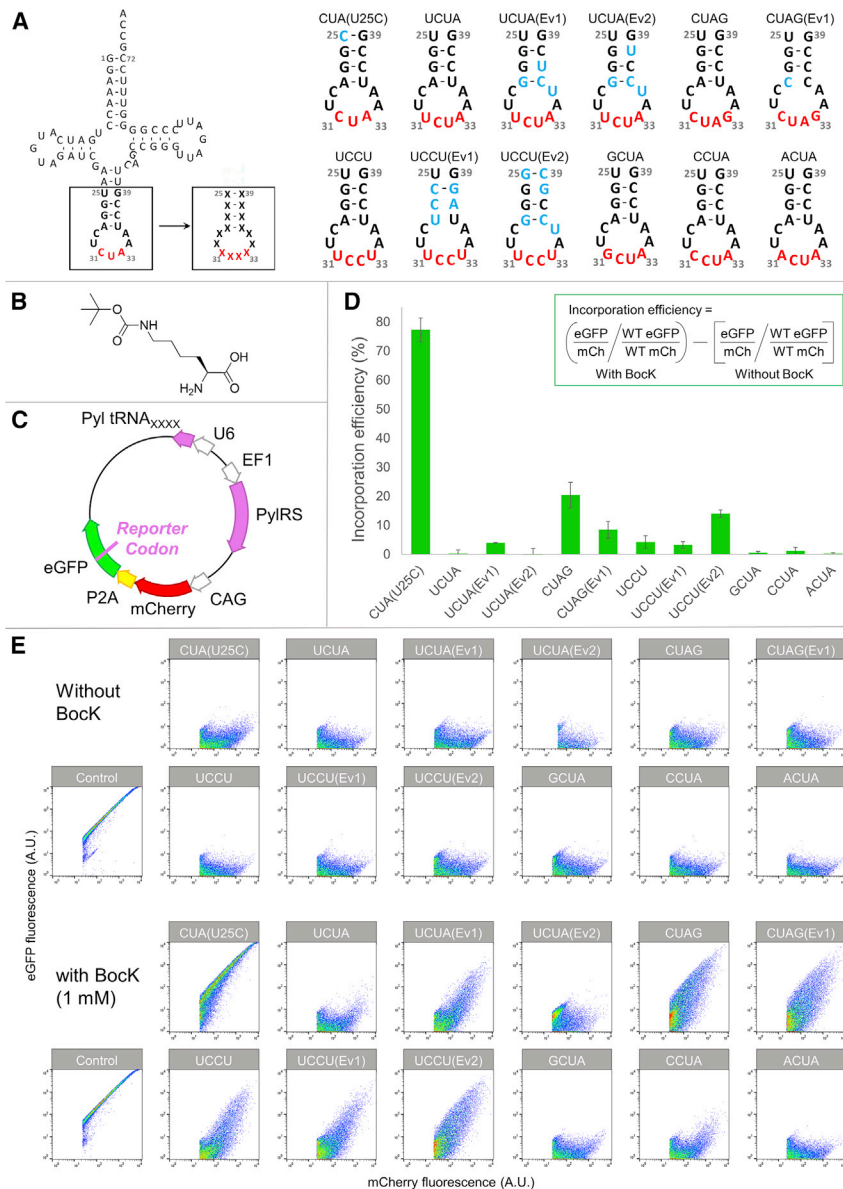

**Figure 2. Pyl tRNA variants for quadruplet decoding in mammalian cells**

(A) Nucleotide sequences of tRNA variants tested; X = A, C, G, or U; red denotes the anticodon, blue denotes mutations from the wild-type Pyl tRNA sequence in *M. mazei*; black denotes bases retained from the wild-type sequence.

(B) Chemical structure of BockK.

(C) Schematic representation of reporters used to analyze PylRS/tRNA<sub>xxxxx</sub>-mediated BockK incorporation into eGFP. The reporter codon encodes the 150<sup>th</sup> amino acid residue of eGFP. Lack of BockK incorporation results in termination of translation and no eGFP fluorescence.

(D) BockK incorporation efficiency of each tRNA<sub>xxxxx</sub> variant. HEK293 cells were transiently transfected with a reporter vector and incubated in the presence or absence of 1 mM BockK. Cells underwent flow-cytometry analysis and the equation displayed was used to calculate incorporation efficiency (Bartschek et al., 2021). Means and standard deviations calculated from three biological replicates are shown.

(E) Representative flow cytometry results used for calculating BockK incorporation efficiency. Events were gated for HEK293 cells and to exclude doublets. Cells were then gated to include only transfected (i.e., mCherry-positive) cells. Fluorescence intensities are given in arbitrary units (a.u.). The geometric mean of fluorescence intensity was used to calculate the incorporation efficiency. See also Figure S1 for fluorescence imaging and immunoblotting results of a single fluorescence eGFP(150XXXX) reporter.

molecules have been engineered as orthogonal pairs for amber suppression in mammalian cells to incorporate various unnatural amino acids (Italia et al., 2018; Nodling et al., 2019). As PylRS/tRNA can be used as an orthogonal pair in *E. coli*, it should remain orthogonal to engineered *Ec*TyrRS/tRNA<sub>CUA</sub> pairs. To verify this, an *Ec*TyrRS variant (referred to hereafter as TyrRS\*) containing Y37V, D182S, F183M, and G265R mutations was chosen. TyrRS\* was reported to be able to incorporate a range of unnatural amino acids, including *O*-methyl-L-tyrosine (OMeY) and 4-azido-L-phenylalanine (AzF), into proteins in mammalian cells (Chatterjee et al., 2013).

For systematic comparison, a reporter vector following the same design as the reporter vector for Pyl tRNA variants was generated, in which PylRS was replaced by TyrRS\* and Pyl tRNA by Tyr tRNA<sub>CUA</sub> (Figure 3A). Although TyrRS\* was

evolved specifically for AzF incorporation (Figure S2B). We thus continued with AzF and TyrRS\*/tRNA<sub>CUA</sub> to confirm the orthogonality with PylRS/tRNA<sub>UCCU(Ev2)</sub>, and showed that the two pairs specifically recognized their respective unnatural amino acids (Figures 3B and S2C). We then transfected HEK293 cells with two vectors, one carrying only the TyrRS\*/tRNA<sub>CUA</sub> machinery, and the other carrying the PylRS/tRNA<sub>UCCU(Ev2)</sub> pair alongside a double-incorporation reporter eGFP(40TAG,150AGGA) that contains a TAG codon for the 40<sup>th</sup> amino acid residue and an AGGA codon for the 150<sup>th</sup> residue in the eGFP gene. For 24 h, cells were maintained under four distinct conditions: (1) no unnatural amino acid, (2) BockK only, (3) AzF only, and (4) both BockK and AzF. Fluorescence was only detected when both unnatural amino acids were present (Figure S3), confirming the orthogonality of the

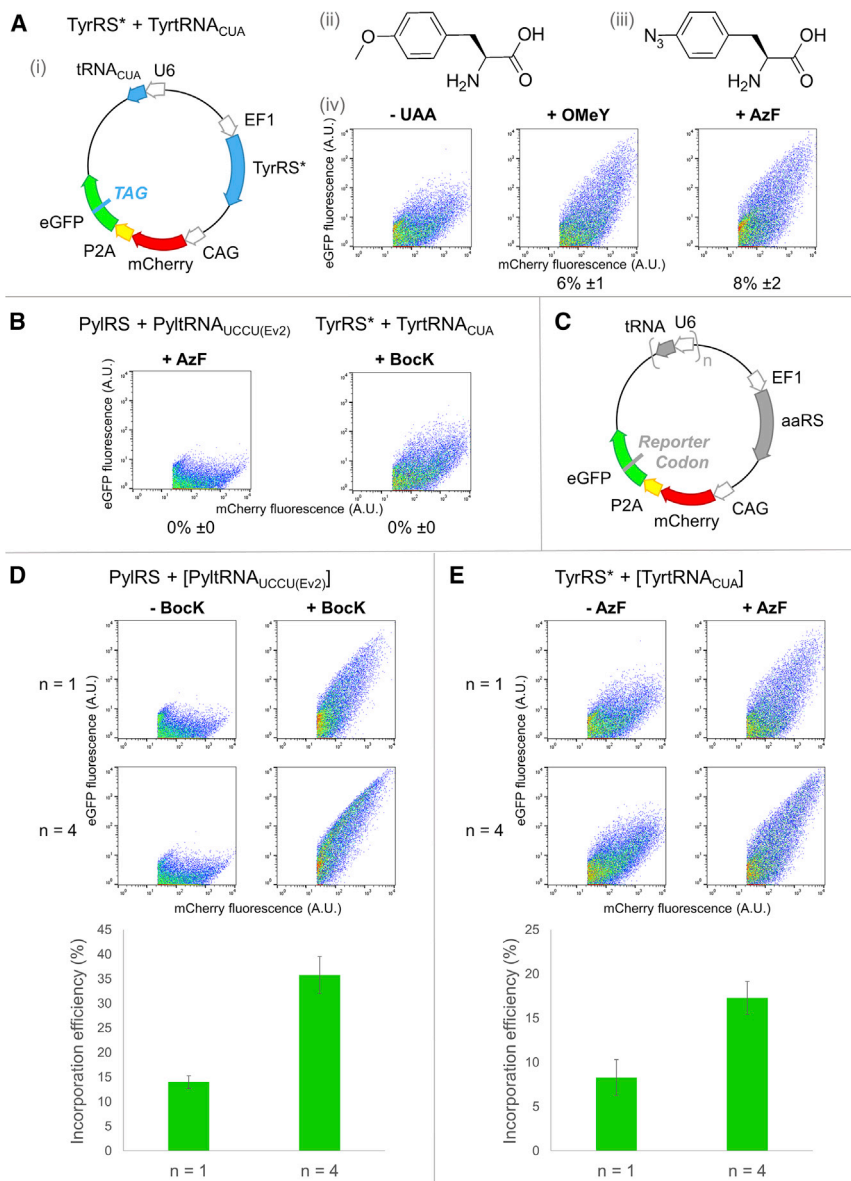

**Figure 3. Confirmation of TyrRS\*/tRNA<sub>CUA</sub> as the second orthogonal pair**

(A) (i) The reporter to test efficiency of TyrRS\*/tRNA<sub>CUA</sub>. (ii) Chemical structure of OMeY. (iii) Chemical structure of AzF. (iv) OMeY or AzF incorporation efficiency by TyrRS\*/tRNA<sub>CUA</sub> in HEK293 cells by using flow cytometry. Higher eGFP fluorescence was detected with AzF supplementation.

(B) Orthogonality of tRNA/aaRS pairs. HEK293 cells transfected with PylRS/tRNA<sub>UCCU(EV2)</sub> or TyrRS\*/tRNA<sub>CUA</sub> reporter vector and incubated for 24 h in the presence of AzF or Bock respectively. Fluorescent eGFP was only detected when the aaRS/tRNA pairs were in the presence of their cognate unnatural amino acid depicting mutual orthogonality of the pairs.

(C) Reporters for testing the impact of tRNA copy number on unnatural amino acid incorporation efficiency.

(D) Comparison of Pyl tRNA<sub>UCCU(EV2)</sub> n = 1 and n = 4.

(E) Comparison of Tyr tRNA<sub>CUA</sub> n = 1 and n = 4. Flow cytometry was used to analyze Bock or AzF incorporation into the 150<sup>th</sup> residue of eGFP. Unnatural amino acids were supplemented into the cell growth medium to a final concentration of 1 mM. Means and standard deviations calculated from three biological replicates are shown. For incorporation efficiency calculation, see Figure 2.

two pairs as well as demonstrating their use for double incorporation into the same protein.

### Optimization of unnatural amino acid incorporation

To use unnatural amino acids as logic gate inputs, their incorporation efficiency would directly affect the logic gate responses and so a higher incorporation efficiency is preferable. We first attempted to improve the incorporation efficiency by overexpression of an engineered eukaryotic release factor 1 (eRF1). With an E55D point mutation, this engineered eRF1 was shown to improve amber suppression by Pyl tRNA<sub>CUA(U25C)</sub> (Li et al., 2020; Schmied et al., 2014). We therefore tested the incorporation efficiency of both aaRS/tRNA pairs here in the presence and absence of this engineered eRF1; however, no significant improvement was observed in either case (Figure S2D).

was also observed in the double-incorporation experiment, as demonstrated by fluorescence microscopy and immunoblotting (Figure S3).

### Construction of logic gates controlled by two unnatural amino acids

For proof of concept, we then applied PylRS/tRNA<sub>UCCU(EV2)</sub> and TyrRS\*/tRNA<sub>CUA</sub> pairs to construct logic gates controlled by two unnatural amino acids, Bock and AzF. The logic gates were designed by using a split GFP system, which requires the concurrent presence of two complementary polypeptides sGFP(1–10) and sGFP(11) to form a fluorescent complex (Cabantous et al., 2005; Kamiyama et al., 2016). When produced individually, the GFP chromophore is unable to assemble, and no fluorescence can be detected (Figures 4A and 4B). In short, the designed logic gates

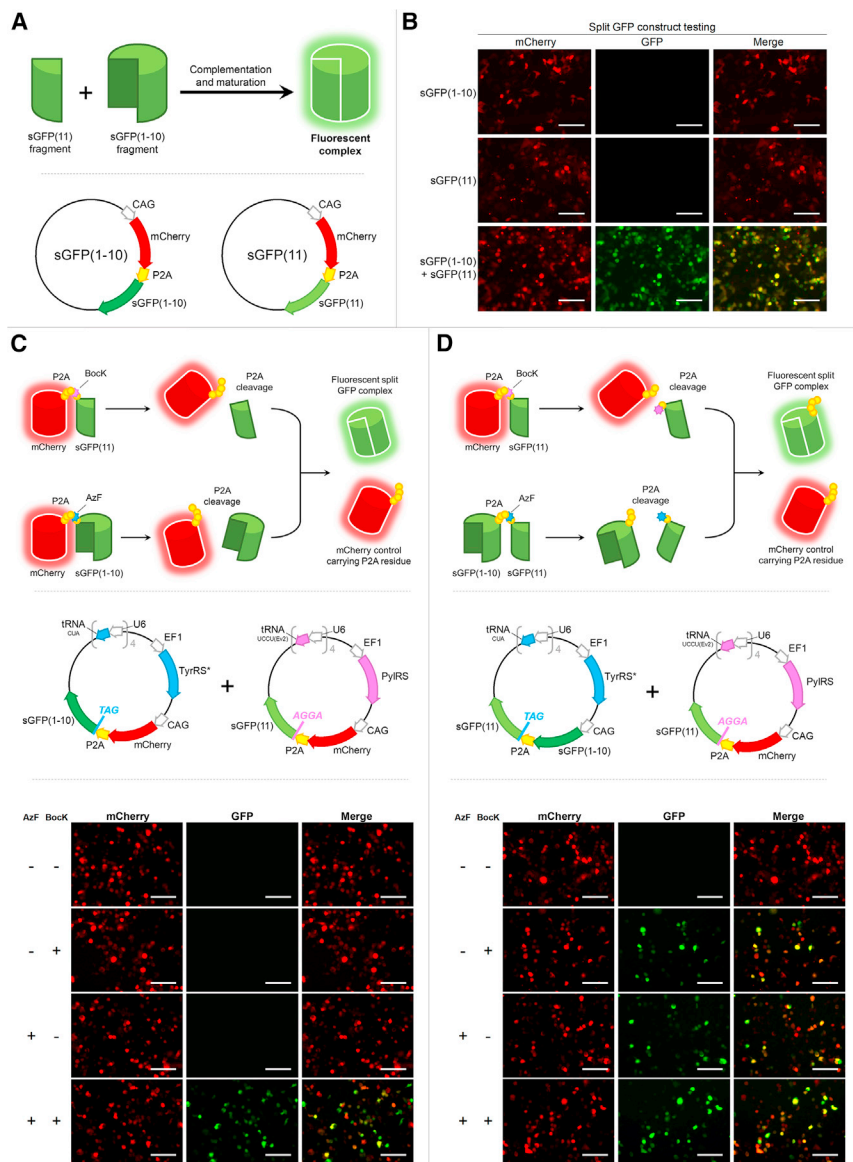

**Figure 4. Exploiting genetic code expansion for AND and OR mammalian cell logic gates**

(A) Principles of how split GFP works and vector designs used for testing the core design for logic operations.

(B) Fluorescent microscope imaging of HEK293 transfected with either or both vectors depicted in (A), GFP fluorescence was only detected when both fragments were present; mCherry expression was equal across all conditions.

(C and D) Shown are (C) AND logic gate and (D) OR logic gate controlled by BockK and AzF. Graphical depiction of principle approach is depicted at the top panel. Vector designs are shown in the middle. Fluorescence imaging results are shown at the bottom panel. HEK293 cells were transfected with the two vectors and incubated under four different conditions: no unnatural amino acid, BockK only, AzF only, or BockK and AzF. mCherry fluorescence indicated transfection efficiency and was at similar intensity across all four conditions. GFP fluorescence represents the logic operation output. All images are  $223 \mu\text{m} \times 167 \mu\text{m}$ , scale bars denote  $50 \mu\text{m}$ . All unnatural amino acids used were supplemented into the cell growth medium to obtain a final concentration of  $1 \text{ mM}$ . See also Figure S4.

pair and mCherry-P2A-TAG-sGFP(1–10), whereas the other vector encodes PyIRS/tRNA<sub>UCCU(EV2)</sub> and mCherry-P2A-AGGA-sGFP(11). As expected, cells with green fluorescence were only observed in the presence of both AzF and BockK, and the level of GFP fluorescence indicates a promising efficiency of the operation.

Using a similar concept, we constructed an OR logic gate (Figure 4D). In this case, sGFP(1–10) was constantly produced, but sGFP(11) was only generated in the presence of either AzF, BockK, or both. Thus, green fluorescence is observed when at least one unnatural

amino acid is present, and again the GFP fluorescence observed indicates a promising operational efficiency.

Finally, to confirm the specificity of BockK/AzF dependence and continuation of orthogonality, the vectors used for logic testing were individually transfected into HEK293 cells and incubated in the presence or absence of their respective unnatural amino acids. Upon imaging, no green fluorescence was detected regardless of unnatural amino acid supplementation for AND logic vectors (Figure S4). Indeed, green fluorescence was only detected with the OR logic vector containing TyrRS\*/tRNA<sub>CUA</sub> and in the presence of AzF.

have two inputs (i.e., BockK and AzF) and one output (i.e., GFP fluorescence). To test them, we created a two-vector system based on the dual-fluorescence reporters (Figures 2 and 3) whereby there is an N-terminal mCherry leading to the sGFP fragments via a P2A sequence (Figures 4A and 4B). These vectors would hence allow for control of sGFP fragment production via selected introduction of TAG or AGGA codon upstream of the sGFP sequences.

To generate a logic gate that performs AND operation, we inserted TAG and AGGA codons into the reporter genes before the sequences encoding sGFP(1–10) and sGFP(11), respectively (Figure 4C). In this case, production of sGFP(1–10) and sGFP(11) became strictly dependent on the presence of AzF and BockK concurrently, and only in the presence of both AzF and BockK can the fluorescent complex form.

## DISCUSSION

HEK293 cells were transiently transfected with two vectors (Figure 4C). One vector encoded the TyrRS\*/tRNA<sub>CUA</sub>

We quantified the quadruplet-decoding efficiency of 11 Pyl tRNA variants in HEK293 cells. Unlike most other aaRS enzymes, PylRS does not recognize the anticodon stem loop on the Pyl tRNA during aminoacylation (Suzuki et al., 2017; Tharp et al., 2018), so alteration of the anticodon is theoretically tolerated by the synthetase. Nevertheless, whereas change of the anticodon from CUA to CUAG or UCCU was tolerated, Pyl tRNA variants with the anticodon NCUA did not seem to be functional in mammalian cells (Figures 2 and S1). In addition, although variation in the nucleic acid sequence of the anticodon stem loop can significantly affect the incorporation efficiency, we found that tRNA sequences optimized in *E. coli* (Niu et al., 2013; Wang et al., 2014, 2016) might not necessarily work well in mammalian cells. For example, Pyl tRNA<sub>CUAG</sub> outperformed Pyl tRNA<sub>CUAG(EV1)</sub>.

Successful incorporation of an unnatural amino acid involves four steps: (1) cellular uptake of the designated unnatural amino acid; (2) aminoacylation of the orthogonal tRNA by the orthogonal synthetase; (3) formation of a ternary complex containing aminoacylated tRNA, eEF1A (or EF-Tu in bacteria), and GTP; and (4) interaction of the ternary complex with the ribosome, followed by peptide bond formation. The high incorporation efficiency of BockK by Pyl tRNA<sub>CUA(U25C)</sub> indicates that BockK can be readily taken up by mammalian cells. Additionally, all tested Pyl tRNA variants should be able to be aminoacylated by PylRS given that all variants were reported to be functional in *E. coli*. Thus, the differences in the prokaryotic and eukaryotic translational machinery (Melnikov et al., 2018) are likely the cause of the observed discrepancy in decoding efficiency, although it remains elusive whether formation of the ternary complex or interaction of the ternary complex with the ribosome is the main cause.

Intriguingly, negligible eGFP production was observed with Pyl tRNA<sub>UCUA</sub> and Pyl tRNA<sub>UCUA(EV2)</sub>. These two variants were reported to be functional in mammalian cells (Chen et al., 2018), although under different experimental conditions. Thus, the discrepancy might result from the choice of the cell line (HEK293 versus HEK293T), BockK concentration (1 mM versus 5 mM), unnatural amino acid incorporation site (40<sup>th</sup> versus 150<sup>th</sup> residue in eGFP), or a combination of these factors.

To construct double-input logic gates, another orthogonal pair, in addition to PylRS/tRNA<sub>UCCU(EV2)</sub>, is required. We chose the *E. coli*-derived TyrRS\*/tRNA<sub>CUA</sub> as it had been optimized for incorporating a range of unnatural amino acids in mammalian cells (Chatterjee et al., 2013). Given that PylRS/tRNA can be used as an orthogonal pair in *E. coli*, it should remain orthogonal to TyrRS\*/tRNA<sub>CUA</sub> in mammalian cells. Indeed, each pair specifically recognized their respective unnatural amino acids (Figure 3B). Furthermore, they can function orthogonally in the same cell, as demonstrated in the double-incorporation experiment (Figure S3). It is noteworthy that PylRS and TyrRS\* can mediate incorporation of different unnatural amino acids, including cyclopropene lysine and propargyl tyrosine (Nodling et al., 2019) for bioorthogonal labeling, so the two orthogonal pairs can further be used for dual modification of proteins.

To use the two pairs in controlling logic gate inputs, higher incorporation efficiency of the two employed unnatural amino acids is ideal. Co-expression of an engineered eRF1 was previ-

ously shown to increase the unnatural amino acid incorporation efficiency by PylRS/tRNA<sub>CUA(U25C)</sub> in mammalian cells (Schmied et al., 2014). However, co-expression of the engineered eRF1 did not appear to improve AzF incorporation by TyrRS\*/tRNA<sub>CUA</sub> or BockK incorporation by PylRS/tRNA<sub>UCCU(EV2)</sub> (Figure S2D). This discrepancy could be due to the difference in the employed orthogonal pairs. In addition, the beneficial effect was most prominent with genes containing multiple UAG codons in the original study (Schmied et al., 2014), whereas we only used single UAG or AGGA codons in our study. Nevertheless, improvement in AzF and BockK incorporation was observed when increasing the tRNA copy number from one to four (Figures 3D and 3E), a strategy that has been shown to work previously (Chatterjee et al., 2013; Schmied et al., 2014).

Finally, we employed the two orthogonal aaRS/tRNA pairs to construct logic gates and demonstrated selective AND and OR logic operations dependent on AzF and BockK supplementation. These designs demonstrate that unnatural amino acids can be used as molecular switches in synthetic biology logic gates. The use of biologically inert unnatural amino acids (Chen et al., 2017; Han et al., 2017; Krogager et al., 2018; Liu et al., 2017; Suzuki et al., 2018) is ideal for constructing orthogonal, artificial pathways for synthetic biological applications with no identifiable side effects or non-specific activities. Moreover, the wide substrate scope of PylRS and TyrRS\* (Nodling et al., 2019) enables fine-tuning the logic gate response for different applications.

To the best of our knowledge, this is the first example of unnatural amino acid-based logic gates in mammalian cells. Further exploration of quadruplet-decoding orthogonal tRNA in eukaryotic cells, as well as the underlying mechanism for their different performance in bacterial and eukaryotic systems, will provide new opportunities and applications for genetic code expansion. This will facilitate not only our understanding of protein structure and function but also the discovery and development of new diagnostics and therapeutics to target human diseases.

### Significance

Mammalian cell logic gates remain heavily limited by the current approaches that involve the use of drug(-like) molecules that carry undesirable biological activities. In light of this, here we developed an alternative approach to mammalian cell logic gates via the simple process of genetic code expansion. By repurposing the cell translational machinery, we demonstrated the use of biologically inert unnatural amino acids as input switch molecules for effective and efficient mammalian cell logic operations, enabling selective and intrinsic control. The results shown here simultaneously expand the scope of genetic code expansion, while providing an exciting approach to mammalian cell logic gates.

### Limitations of the study

Although this study expands the scope of mammalian cell logic circuits, it is important to note that this investigation employed human embryonic kidney (HEK293) cells and the tRNA variants might perform differently in other cell lines. Additionally, as with all genetic code expansion applications, amber and quadruplet suppression might not be limited to the gene of interest and



can potentially incorporate unnatural amino acids into other applicable codons in the host genome.

## STAR★METHODS

Detailed methods are provided in the online version of this paper and include the following:

- KEY RESOURCES TABLE
- RESOURCE AVAILABILITY
  - Lead contact
  - Materials availability
  - Data and code availability
- EXPERIMENTAL MODEL AND SUBJECT DETAILS
- METHOD DETAILS
  - Vector cloning
  - Transient transfection
  - Imaging
  - Flow cytometry
  - Immunoblotting
- QUANTIFICATION AND STATISTICAL ANALYSIS

## SUPPLEMENTAL INFORMATION

Supplemental information can be found online at <https://doi.org/10.1016/j.crmeth.2021.100073>.

## ACKNOWLEDGMENTS

We are grateful for the financial support from BBSRC (BB/P009506/1), EPSRC (EP/T020687/1 and studentship to V.L.B.), and European Social Fund and Tenovus Cancer Care (Knowledge Economy Skills Scholarship to E.M.M.). We thank Prof. Dr. Anthony C.F. Perry for helpful discussions.

## AUTHOR CONTRIBUTIONS

Conceptualization, E.M.M. and Y.H.T.; methodology, E.M.M., V.L.B., and Y.H.T.; validation, V.L.B.; formal analysis, E.M.M. and V.L.B.; investigation, E.M.M. and V.L.B.; writing, E.M.M., V.L.B., A.T.J., and Y.H.T.; supervision, A.T.J. and Y.H.T.; project administration, Y.H.T.; funding acquisition, A.T.J. and Y.H.T.

## DECLARATION OF INTERESTS

The authors declare no competing interests.

Received: January 4, 2021

Revised: July 20, 2021

Accepted: August 13, 2021

Published: September 16, 2021

## REFERENCES

Anderson, J.C., Wu, N., Santoro, S.W., Lakshman, V., King, D.S., and Schultz, P.G. (2004). An expanded genetic code with a functional quadruplet codon. *Proc. Natl. Acad. Sci. U S A* *101*, 7566–7571.

Bartoschek, M.D., Ugur, E., Nguyen, T.A., Rodschinka, G., Wierer, M., Lang, K., and Bultmann, S. (2021). Identification of permissive amber suppression sites for efficient non-canonical amino acid incorporation in mammalian cells. *Nucleic Acids Res.* *49*, e62.

Brown, W., Liu, J.H., and Deiters, A. (2018). Genetic code expansion in animals. *ACS Chem. Biol.* *13*, 2375–2386.

Cabantous, S., Terwilliger, T.C., and Waldo, G.S. (2005). Protein tagging and detection with engineered self-assembling fragments of green fluorescent protein. *Nat. Biotechnol.* *23*, 102–107.

Chatterjee, A., Xiao, H., Bollong, M., Ai, H.W., and Schultz, P.G. (2013). Efficient viral delivery system for unnatural amino acid mutagenesis in mammalian cells. *Proc. Natl. Acad. Sci. U S A* *110*, 11803–11808.

Chen, Y., Wan, Y., Wang, N., Yuan, Z., Niu, W., Li, Q., and Guo, J. (2018). Controlling the replication of a genomically recoded HIV-1 with a functional quadruplet codon in mammalian cells. *ACS Synth. Biol.* *7*, 1612–1617.

Chen, Y.T., Ma, J., Lu, W.Q., Tian, M.L., Thauvin, M., Yuan, C.G., Volovitch, M., Wang, Q., Holst, J., Liu, M.Y., et al. (2017). Heritable expansion of the genetic code in mouse and zebrafish. *Cell Res.* *27*, 294–297.

Chin, J.W. (2017). Expanding and reprogramming the genetic code. *Nature* *550*, 53–60.

Cuthbertson, L., and Nodwell, J.R. (2013). The TetR family of regulators. *Microbiol. Mol. Biol. Rev.* *77*, 440–475.

de la Torre, D., and Chin, J.W. (2021). Reprogramming the genetic code. *Nat. Rev. Genet.* *22*, 169–184.

Dumas, A., Lercher, L., Spicer, C.D., and Davis, B.G. (2015). Designing logical codon reassignment - expanding the chemistry in biology. *Chem. Sci.* *6*, 50–69.

Dunkelmann, D.L., Willis, J.C.W., Beattie, A.T., and Chin, J.W. (2020). Engineered triply orthogonal pyrrolysyl-tRNA synthetase/tRNA pairs enable the genetic encoding of three distinct non-canonical amino acids. *Nat. Chem.* *12*, 535–544.

Fink, T., Lonzaric, J., Praznik, A., Plaper, T., Merljak, E., Leben, K., Jerala, N., Lebar, T., Strmsek, Z., Lapenta, F., et al. (2019). Design of fast proteolysis-based signaling and logic circuits in mammalian cells. *Nat. Chem. Biol.* *15*, 115–122.

Gautier, A., Nguyen, D.P., Lusic, H., An, W.A., Deiters, A., and Chin, J.W. (2010). Genetically encoded photocontrol of protein localization in mammalian cells. *J. Am. Chem. Soc.* *132*, 4086–4088.

Han, S., Yang, A., Lee, S., Lee, H.W., Park, C.B., and Park, H.S. (2017). Expanding the genetic code of *Mus musculus*. *Nat. Commun.* *8*, 14568.

Huang, Y., and Liu, T. (2018). Therapeutic applications of genetic code expansion. *Synth. Syst. Biotechnol.* *3*, 150–158.

Italia, J.S., Latour, C., Wrobel, C.J.J., and Chatterjee, A. (2018). Resurrecting the bacterial tyrosyl-tRNA synthetase/tRNA pair for expanding the genetic code of both *E. coli* and Eukaryotes. *Cell Chem Biol.* *25*, 1304–1312.e5.

Ivanov, V., Beniaminov, A., Mikhayev, A., and Minyat, E. (2001). A mechanism for stop codon recognition by the ribosome: a bioinformatic approach. *RNA* *7*, 1683–1692.

Kamiyama, D., Sekine, S., Barsi-Rhyne, B., Hu, J., Chen, B., Gilbert, L.A., Ishikawa, H., Leonetti, M.D., Marshall, W.F., Weissman, J.S., et al. (2016). Versatile protein tagging in cells with split fluorescent protein. *Nat. Commun.* *7*, 11046.

Kato, Y. (2019). Translational control using an expanded genetic code. *Int. J. Mol. Sci.* *20*, 887.

Kim, J.H., Lee, S.R., Li, L.H., Park, H.J., Park, J.H., Lee, K.Y., Kim, M.K., Shin, B.A., and Choi, S.Y. (2011). High cleavage efficiency of a 2A peptide derived from porcine teschovirus-1 in human cell lines, zebrafish and mice. *Plos One* *6*, e18556.

Kitada, T., DiAndreth, B., Teague, B., and Weiss, R. (2018). Programming gene and engineered-cell therapies with synthetic biology. *Science* *359*, eaad1067.

Krogager, T.P., Ernst, R.J., Elliott, T.S., Calo, L., Beranek, V., Ciabatti, E., Spillantini, M.G., Tripodi, M., Hastings, M.H., and Chin, J.W. (2018). Labeling and identifying cell-specific proteomes in the mouse brain. *Nat. Biotechnol.* *36*, 156–159.

Li, Y., Wang, S., Chen, Y., Li, M., Dong, X., Hang, H.C., and Peng, T. (2020). Site-specific chemical fatty-acylation for gain-of-function analysis of protein S-palmitoylation in live cells. *Chem. Commun.* *56*, 13880–13883.

- Liu, J., Hemphill, J., Samanta, S., Tsang, M., and Deiters, A. (2017). Genetic code expansion in zebrafish embryos and its application to optical control of cell signaling. *J. Am. Chem. Soc.* *139*, 9100–9103.
- Meineke, B., Heimgartner, J., Eirich, J., Landreh, M., and Elsasser, S.J. (2020). Site-specific incorporation of two ncAAs for two-color bioorthogonal labeling and crosslinking of proteins on live mammalian cells. *Cell Rep.* *31*, 107811.
- Meineke, B., Heimgartner, J., Lafranchi, L., and Elsasser, S.J. (2018). Methanomythophilus alvus Mx1201 provides basis for mutual orthogonal pyrrolysyl tRNA/aminoacyl-tRNA synthetase pairs in mammalian cells. *ACS Chem. Biol.* *13*, 3087–3096.
- Melnikov, S., Manakongtreecheep, K., and Soll, D. (2018). Revising the structural diversity of ribosomal proteins across the three domains of life. *Mol. Biol. Evol.* *35*, 1588–1598.
- Monk, J.W., Leonard, S.P., Brown, C.W., Hammerling, M.J., Mortensen, C., Gutierrez, A.E., Shin, N.Y., Watkins, E., Mishler, D.M., and Barrick, J.E. (2017). Rapid and inexpensive evaluation of nonstandard amino acid incorporation in *Escherichia coli*. *ACS Synth. Biol.* *6*, 45–54.
- Moore, B., Persson, B.C., Nelson, C.C., Gesteland, R.F., and Atkins, J.F. (2000). Quadruplet codons: implications for code expansion and the specification of translation step size. *J. Mol. Biol.* *298*, 195–209.
- Neumann-Staubitz, P., and Neumann, H. (2016). The use of unnatural amino acids to study and engineer protein function. *Curr. Opin. Struct. Biol.* *38*, 119–128.
- Neumann, H., Wang, K.H., Davis, L., Garcia-Alai, M., and Chin, J.W. (2010). Encoding multiple unnatural amino acids via evolution of a quadruplet-decoding ribosome. *Nature* *464*, 441–444.
- Nguyen, D.P., Miyaoka, Y., Gilbert, L.A., Mayerl, S.J., Lee, B.H., Weissman, J.S., Conklin, B.R., and Wells, J.A. (2016). Ligand-binding domains of nuclear receptors facilitate tight control of split CRISPR activity. *Nat. Commun.* *7*, 12009.
- Niu, W., Schultz, P.G., and Guo, J. (2013). An expanded genetic code in mammalian cells with a functional quadruplet codon. *ACS Chem. Biol.* *8*, 1640–1645.
- Nodling, A.R., Spear, L.A., Williams, T.L., Luk, L.Y.P., and Tsai, Y.-H. (2019). Using genetically incorporated unnatural amino acids to control protein functions in mammalian cells. *Essays Biochem.* *63*, 237–266.
- O'Connor, M. (2002). Insertions in the anticodon loop of tRNA<sup>1Gln(sufG)</sup> and tRNA<sup>(Lys)</sup> promote quadruplet decoding of CAAA. *Nucleic Acids Res.* *30*, 1985–1990.
- Potts, K.A., Stieglitz, J.T., Lei, M., and Van Deventer, J.A. (2020). Reporter system architecture affects measurements of noncanonical amino acid incorporation efficiency and fidelity. *Mol. Syst. Des. Eng.* *5*, 573–588.
- Ross, B., Mehta, S., and Zhang, J. (2016). Molecular tools for acute spatiotemporal manipulation of signal transduction. *Curr. Opin. Chem. Biol.* *34*, 135–142.
- Scheller, L., and Fussenegger, M. (2019). From synthetic biology to human therapy: engineered mammalian cells. *Curr. Opin. Biotechnol.* *58*, 108–116.
- Schmied, W.H., Elsasser, S.J., Uttamapinant, C., and Chin, J.W. (2014). Efficient multisite unnatural amino acid incorporation in mammalian cells via optimized pyrrolysyl tRNA synthetase/tRNA expression and engineered eRF1. *J. Am. Chem. Soc.* *136*, 15577–15583.
- Singh, V. (2014). Recent advances and opportunities in synthetic logic gates engineering in living cells. *Syst. Synth. Biol.* *8*, 271–282.
- Suzuki, T., Asami, M., Patel, S.G., Luk, L.Y.P., Tsai, Y.-H., and Perry, A.C.F. (2018). Switchable genome editing via genetic code expansion. *Sci. Rep.* *8*, 10051.
- Suzuki, T., Miller, C., Guo, L.T., Ho, J.M.L., Bryson, D.I., Wang, Y.S., Liu, D.R., and Soll, D. (2017). Crystal structures reveal an elusive functional domain of pyrrolysyl-tRNA synthetase. *Nat. Chem. Biol.* *13*, 1261–1266.
- Taki, M., Matsushita, J., and Sisido, M. (2006). Expanding the genetic code in a mammalian cell line by the introduction of four-base codon/anticodon pairs. *ChemBioChem* *7*, 425–428.
- Takimoto, J.K., Adams, K.L., Xiang, Z., and Wang, L. (2009). Improving orthogonal tRNA-synthetase recognition for efficient unnatural amino acid incorporation and application in mammalian cells. *Mol. Biosyst.* *5*, 931–934.
- Tharp, J.M., Ehnbohm, A., and Liu, W.R. (2018). tRNA<sup>(Pyl)</sup>: structure, function, and applications. *RNA Biol.* *15*, 441–452.
- Wang, K., Sachdeva, A., Cox, D.J., Wilf, N.M., Lang, K., Wallace, S., Mehl, R.A., and Chin, J.W. (2014). Optimized orthogonal translation of unnatural amino acids enables spontaneous protein double-labelling and FRET. *Nat. Chem.* *6*, 393–403.
- Wang, N., Shang, X., Cerny, R., Niu, W., and Guo, J. (2016). Systematic evolution and study of UAGN decoding tRNAs in a genomically recoded bacteria. *Sci. Rep.* *6*, 21898.
- Willis, J.C.W., and Chin, J.W. (2018). Mutually orthogonal pyrrolysyl-tRNA synthetase/tRNA pairs. *Nat. Chem.* *10*, 831–837.
- Wu, C.Y., Roybal, K.T., Puchner, E.M., Onuffer, J., and Lim, W.A. (2015). Remote control of therapeutic T cells through a small molecule-gated chimeric receptor. *Science* *350*, aab4077.
- Xiao, H., Chatterjee, A., Choi, S.H., Bajjuri, K.M., Sinha, S.C., and Schultz, P.G. (2013). Genetic incorporation of multiple unnatural amino acids into proteins in mammalian cells. *Angew. Chem. Int. Ed.* *52*, 14080–14083.
- Yanagisawa, T., Ishii, R., Fukunaga, R., Kobayashi, T., Sakamoto, K., and Yokoyama, S. (2008). Multistep engineering of pyrrolysyl-tRNA synthetase to genetically encode N(epsilon)-(o-azidobenzoyloxycarbonyl) lysine for site-specific protein modification. *Chem. Biol.* *15*, 1187–1197.
- Zetsche, B., Volz, S.E., and Zhang, F. (2015). A split-Cas9 architecture for inducible genome editing and transcription modulation. *Nat. Biotechnol.* *33*, 139–142.
- Zheng, Y., Addy, P.S., Mukherjee, R., and Chatterjee, A. (2017). Defining the current scope and limitations of dual noncanonical amino acid mutagenesis in mammalian cells. *Chem. Sci.* *8*, 7211–7217.
- Zheng, Y., Mukherjee, R., Chin, M.A., Igo, P., Gilgenast, M.J., and Chatterjee, A. (2018). Expanding the scope of single- and double-noncanonical amino acid mutagenesis in mammalian cells using orthogonal polyspecific leucyl-tRNA synthetases. *Biochemistry* *57*, 441–445.
- Zhou, W., Smidlehner, T., and Jerala, R. (2020). Synthetic biology principles for the design of protein with novel structures and functions. *FEBS Lett.* *594*, 2199–2212.

## STAR★METHODS

### KEY RESOURCES TABLE

| REAGENT or RESOURCE                                                                                                 | SOURCE                   | IDENTIFIER                                                                                          |
|---------------------------------------------------------------------------------------------------------------------|--------------------------|-----------------------------------------------------------------------------------------------------|
| <b>Antibodies</b>                                                                                                   |                          |                                                                                                     |
| $\alpha$ -eGFP                                                                                                      | ThermoFisher             | #MA1-952;<br>RRID:AB_889471                                                                         |
| $\alpha$ -mouse                                                                                                     | ThermoFisher             | #32430;<br>RRID:AB_1185566                                                                          |
| $\alpha$ -GAPDH                                                                                                     | ThermoFisher             | #MA5-15738;<br>RRID:AB_10977387                                                                     |
| $\alpha$ -FLAG                                                                                                      | Sigma                    | #F3165;<br>RRID:AB_259529                                                                           |
| <b>Bacterial and virus strains</b>                                                                                  |                          |                                                                                                     |
| <i>Escherichia coli</i> OneShot Stbl3                                                                               | ThermoFisher             | Cat#C737303                                                                                         |
| <b>Chemicals, peptides, and recombinant proteins</b>                                                                |                          |                                                                                                     |
| Bock                                                                                                                | Fluorochem               | Cat#078520                                                                                          |
| AzF                                                                                                                 | Bachem                   | Cat#4020250                                                                                         |
| OMeY                                                                                                                | Alfa Aesar               | H63096                                                                                              |
| <b>Deposited data</b>                                                                                               |                          |                                                                                                     |
| Biological triplicates of flow cytometry results (*.fcs) available in depository                                    | This paper               | <a href="https://doi.org/10.17035/d.2021.0135747960">https://doi.org/10.17035/d.2021.0135747960</a> |
| <b>Experimental models: Cell lines</b>                                                                              |                          |                                                                                                     |
| HEK293                                                                                                              | ECACC General Collection | Cat#85120602; RRID:CVCL_0045                                                                        |
| <b>Oligonucleotides</b>                                                                                             |                          |                                                                                                     |
| See <a href="#">Table S1</a> in the <a href="#">supplemental information</a>                                        | Merck Life Sciences      | VC00021                                                                                             |
| <b>Recombinant DNA</b>                                                                                              |                          |                                                                                                     |
| See vector cloning section below and the supplemental information for vector sequences <a href="#">STAR methods</a> | This paper               | n/a                                                                                                 |
| Vector 58: Pyl tRNA <sub>CUA(U25C)</sub> PyIRS mCherry-P2A-eGFP(150TAG)                                             | This paper               | Addgene Plasmid #174526                                                                             |
| Vector 62: Pyl tRNA <sub>CUAG</sub> PyIRS mCherry-P2A-eGFP(150CTAG)                                                 | This paper               | Addgene Plasmid #174527                                                                             |
| Vector 66: Pyl tRNA <sub>UCCU(EV2)</sub> PyIRS mCherry-P2A-eGFP(150AGGA)                                            | This paper               | Addgene Plasmid #174528                                                                             |
| Vector 73: 4x(Pyl tRNA <sub>UCCU(EV2)</sub> ) PyIRS mCherry-P2A-eGFP(150AGGA)                                       | This paper               | Addgene Plasmid #174529                                                                             |
| <b>Software and algorithms</b>                                                                                      |                          |                                                                                                     |
| FlowJo                                                                                                              | BD Biosciences           | RRID:SCR_008520                                                                                     |
| ZEN                                                                                                                 | Zeiss                    | RRID:SCR_013672                                                                                     |
| Image Lab                                                                                                           | Bio-Rad                  | RRID:SCR_014210                                                                                     |
| <b>Other</b>                                                                                                        |                          |                                                                                                     |
| Dulbecco's Modified Eagle Medium with GlutaMAX supplement                                                           | Fisher Scientific        | #11574516                                                                                           |
| Fetal bovine serum                                                                                                  | Fisher Scientific        | #11573397                                                                                           |
| Trypsin-EDTA (0.25%)                                                                                                | Fisher Scientific        | #11560626                                                                                           |
| Dulbecco's Phosphate Buffered Saline                                                                                | Sigma                    | #D1408                                                                                              |
| Lipofectamine 2000                                                                                                  | Life Technologies        | #10696343                                                                                           |
| Opti-MEM                                                                                                            | Fisher Scientific        | #11058021                                                                                           |

### RESOURCE AVAILABILITY

#### Lead contact

Further information and requests for resources and reagents should be directed to and will be fulfilled by the lead contact, Yu-Hsuan Tsai ([Tsai.Y-H@outlook.com](mailto:Tsai.Y-H@outlook.com)).

#### Materials availability

Full DNA sequences for each vector used in the main manuscript can be found in the Supporting Information. Plasmids generated in this study have been deposited to Addgene: 174526 for vector 58 – Pyl tRNA<sub>CUA(U25C)</sub> PyIRS mCherry-P2A-eGFP(150TAG); 174527 for vector 62 – Pyl tRNA<sub>CUAG</sub> PyIRS mCherry-P2A-eGFP(150CTAG); 174528 for vector 66 – Pyl tRNA<sub>UCCU(EV2)</sub> PyIRS mCherry-P2A-eGFP(150AGGA); 174529 for vector 73 – 4x(Pyl tRNA<sub>UCCU(EV2)</sub>) PyIRS mCherry-P2A-eGFP(150AGGA).

#### Data and code availability

- All FACS data have been deposited to the Cardiff University data catalogue and are publicly available as of the date of publication. DOIs are listed in the [key resources table](#). Microscopy data reported in this paper will be shared by the lead contact upon request.
- This paper does not report original code.
- Any additional information required to reanalyse the data reported in this paper is available from the lead contact upon request.

### EXPERIMENTAL MODEL AND SUBJECT DETAILS

HEK293 cells were obtained from ECACC (ECACC General Collection, #85120602) and routinely tested for mycoplasma infection. Cells were maintained in T75 flasks at 37 °C in a 5% CO<sub>2</sub> high-humidity atmosphere in Dulbecco's Modified Eagle Medium (DMEM) with GlutaMAX supplement (Fisher Scientific, #11574516) supplemented with 10% (v/v) fetal bovine serum (FBS; Fisher Scientific, #11573397). Cells were maintained at a sub-confluent monolayer and split at 80–85% confluency. For splitting, cells were washed with Dulbecco's phosphate buffered saline (DPBS; Sigma, #D1408), detached in 1 mL of 0.25% trypsin-EDTA (Fisher Scientific, #11560626) and 200 μL of the 1000 μL trypsin cell suspension was re-suspended in 12 mL fresh DMEM containing 10% (v/v) FBS in a new T75 flask.

### METHOD DETAILS

#### Vector cloning

All Vector stocks were generated and maintained via transformation of chemically competent One Shot™ Stb13™ *E. coli* cells from ThermoFisher (ThermoFisher, #C737303) and isolated from 5 mL cultures using QIAprep Spin Miniprep Kit (Qiagen, #27106) following the manufacturer's protocol. Where appropriate, restriction digests were conducted using FastDigest restriction enzymes (Thermo Scientific) following manufacturer's protocol. PCR was conducted in a thermocycler using PrimeSTAR Max (Takara, #R045A) following the manufacturer's protocol. Restriction digests and PCR products were electrophoresed on 1% agarose gels in TAE buffer (40 mM Tris pH 7.6, 20 mM acetic acid, 1 mM EDTA) and visualised using SYBRSafe DNA stain (Invitrogen, #S33102). Desired bands were excised from the gel and extracted using QIAquick Gel Extraction Kit (Qiagen, #28704) following the manufacturer's protocol. T4 ligations were performed using T4 DNA Ligase (ThermoFisher, #EL0014) and Gibson assembly via NEBuilder HiFi DNA Assembly (New England Biolabs, #E5520) following respective manufacturers protocols. All constructs were confirmed via Sanger sequencing. A list of primers used in this study is provided in [Table S1](#).

#### Vector 1: Pyl tRNA<sub>CUA(U25C)</sub>

This Vector was purchased from GeneArt (ThermoFisher). The full DNA sequence can be found in the [supplemental information](#).

#### Vector 2: 4xPyl tRNA<sub>CUA(U25C)</sub>-PyIRS-eGFP(150TAG)

This Vector is pEF1α-FLAGPyIRS-CAG-eGFP(150TAG)-4xU6-PyITU25C (Ref: 10.1038/s41598-018-28178-3).

#### Vector 3: Pyl tRNA<sub>CUA(U25C)</sub>-PyIRS-eGFP(150TAG)

**Vector 2** was cut with the restriction enzyme Eco147i to generate the vector. Insert generated via PCR of **Vector 2** using **Primer 1** and **Primer 2**. The vector and insert were combined using Gibson Assembly.

#### Vector 4: pCAG-eGFP

This Vector is pCAG-eGFP (Ref: Perry, A. C. F. *et al.* Mammalian transgenesis by intracytoplasmic sperm injection. *Science* **284**, 1180–1183 (1999).)

#### Vector 5: eGFP(150TAGA)

Cloned by PCR mutagenesis of **Vector 4** using **Primer 3** and **Primer 4**. Template **Vector 4** removed from reaction mixture via DpnI restriction enzyme digest.

**Vector 6: eGFP(150CTAG)**

Cloned by PCR mutagenesis of **Vector 4** using **Primer 3** and **Primer 5**. Template **Vector 4** removed from reaction mixture via DpnI restriction enzyme digest.

**Vector 7: eGFP(150AGGA)**

Cloned by PCR mutagenesis of **Vector 4** using **Primer 3** and **Primer 6**. Template **Vector 4** removed from reaction mixture via DpnI restriction enzyme digest.

**Vector 8: eGFP(150TAGT)**

Cloned by PCR mutagenesis of **Vector 4** using **Primer 3** and **Primer 7**. Template **Vector 4** removed from reaction mixture via DpnI restriction enzyme digest.

**Vector 9: eGFP(150TAGC)**

Cloned by PCR mutagenesis of **Vector 4** using **Primer 3** and **Primer 8**. Template **Vector 4** removed from reaction mixture via DpnI restriction enzyme digest.

**Vector 10: eGFP(150TAGG)**

Cloned by PCR mutagenesis of **Vector 4** using **Primer 3** and **Primer 9**. Template **Vector 4** removed from reaction mixture via DpnI restriction enzyme digest.

**Vector 11: Pyl tRNA<sub>CUA(U25C)</sub>-PylRS-eGFP(150TAGA)**

Vector generated via digestion of **Vector 3** with the restriction enzymes BglII and XbaI. Insert generated via digestion of **Vector 5** with BglII and XbaI. The vector and insert fragments were assembled by T4 ligation.

**Vector 12: Pyl tRNA<sub>CUA(U25C)</sub>-PylRS-eGFP(150CTAG)**

Vector generated via digestion of **Vector 3** with restriction enzymes BglII and XbaI. Insert generated via digestion of **Vector 6** with BglII and XbaI. The vector and insert fragments were assembled by T4 ligation.

**Vector 13: Pyl tRNA<sub>CUA(U25C)</sub>-PylRS-eGFP(150AGGA)**

Vector generated via digestion of **Vector 3** with restriction enzymes BglII and XbaI. Insert generated via digestion of **Vector 7** with BglII and XbaI. The vector and insert fragments were assembled by T4 ligation.

**Vector 14: Pyl tRNA<sub>CUA(U25C)</sub>-PylRS-eGFP(150TAGT)**

Vector generated via digestion of **Vector 3** with the restriction enzymes BglII and XbaI. Insert generated via digestion of **Vector 8** with BglII and XbaI. The vector and insert fragments were assembled by T4 ligation.

**Vector 15: Pyl tRNA<sub>CUA(U25C)</sub>-PylRS-eGFP(150TAGC)**

Vector generated via digestion of **Vector 3** with the restriction enzymes BglII and XbaI. Insert generated via digestion of **Vector 9** with BglII and XbaI. The vector and insert fragments were assembled by T4 ligation.

**Vector 16: Pyl tRNA<sub>CUA(U25C)</sub>-PylRS-eGFP(150TAGT)**

Vector generated via digestion of **Vector 3** with the restriction enzymes BglII and XbaI. Insert generated via digestion of **Vector 10** with BglII and XbaI. The vector and insert fragments were assembled by T4 ligation.

**Vector 17: Pyl tRNA<sub>UCUA</sub>**

Cloned by PCR mutagenesis of **Vector 1** using **Primer 10** and **Primer 11**. The template **Vector 1** was removed from the reaction mixture via DpnI restriction enzyme digest.

**Vector 18: Pyl tRNA<sub>UCUA(EV1)</sub>**

Cloned by PCR mutagenesis of **Vector 1** using **Primer 10** and **Primer 12**. The template **Vector 1** was removed from the reaction mixture via DpnI restriction enzyme digest.

**Vector 19: Pyl tRNA<sub>UCUA(EV2)</sub>**

Cloned by PCR mutagenesis of **Vector 1** using **Primer 10** and **Primer 13**. The template **Vector 1** was removed from the reaction mixture via DpnI restriction enzyme digest.

**Vector 20: Pyl tRNA<sub>CUAG</sub>**

Cloned by PCR mutagenesis of **Vector 1** using **Primer 10** and **Primer 14**. The template **Vector 1** was removed from the reaction mixture via DpnI restriction enzyme digest.

**Vector 21: Pyl tRNA<sub>CUAG(EV1)</sub>**

Cloned by PCR mutagenesis of **Vector 1** using **Primer 10** and **Primer 15**. The template **Vector 1** was removed from the reaction mixture via DpnI restriction enzyme digest.

**Vector 22: Pyl tRNA<sub>UCCU</sub>**

Cloned by PCR mutagenesis of **Vector 1** using **Primer 10** and **Primer 16**. The template **Vector 1** was removed from the reaction mixture via DpnI restriction enzyme digest.

**Vector 23: Pyl tRNA<sub>UCCU(EV1)</sub>**

Cloned by PCR mutagenesis of **Vector 1** using **Primer 10** and **Primer 17**. The template **Vector 1** was removed from the reaction mixture via DpnI restriction enzyme digest.

**Vector 24: Pyl tRNA<sub>UCCU(EV2)</sub>**

Cloned by PCR mutagenesis of **Vector 1** using **Primer 10** and **Primer 18**. The template **Vector 1** was removed from the reaction mixture via DpnI restriction enzyme digest.

### **Vector 25: Pyl tRNA<sub>ACUA</sub>**

Cloned by PCR mutagenesis of **Vector 1** using **Primer 10** and **Primer 19**. The template **Vector 1** was removed from the reaction mixture via DpnI restriction enzyme digest.

### **Vector 26: Pyl tRNA<sub>GCUA</sub>**

Cloned by PCR mutagenesis of **Vector 1** using **Primer 10** and **Primer 20**. The template **Vector 1** was removed from the reaction mixture via DpnI restriction enzyme digest.

### **Vector 27: Pyl tRNA<sub>CCUA</sub>**

Cloned by PCR mutagenesis of **Vector 1** using **Primer 10** and **Primer 21**. The template **Vector 1** was removed from the reaction mixture via DpnI restriction enzyme digest.

### **Vector 28: Pyl tRNA<sub>UCUA</sub>-PyIRS-eGFP(150TAGA)**

Vector generated by digesting **Vector 11** with the restriction enzymes Eco147i and AgeI. Insert generated from restriction digestion of **Vector 17** using Eco147i and AgeI. The vector and insert fragments were assembled by T4 ligation.

### **Vector 29: Pyl tRNA<sub>UCUA(EV1)</sub>-PyIRS-eGFP(150TAGA)**

Vector generated by digesting **Vector 11** with the restriction enzymes Eco147i and AgeI. Insert generated from restriction digestion of **Vector 18** using Eco147i and AgeI. The vector and insert fragments were assembled by T4 ligation.

### **Vector 30: Pyl tRNA<sub>UCUA(EV2)</sub>-PyIRS-eGFP(150TAGA)**

Vector generated by digesting **Vector 11** with the restriction enzymes Eco147i and AgeI. Insert generated from restriction digestion of **Vector 19** using Eco147i and AgeI. The vector and insert fragments were assembled by T4 ligation.

### **Vector 31: Pyl tRNA<sub>CUAG</sub>-PyIRS-eGFP(150CTAG)**

Vector generated by digesting **Vector 12** with the restriction enzymes Eco147i and AgeI. Insert generated from restriction digestion of **Vector 20** using Eco147i and AgeI. The vector and insert fragments were assembled by T4 ligation.

### **Vector 32: Pyl tRNA<sub>CUAG(EV1)</sub>-PyIRS-eGFP(150CTAG)**

Vector generated by digesting **Vector 12** with the restriction enzymes Eco147i and AgeI. Insert generated from restriction digestion of **Vector 21** using Eco147i and AgeI. The vector and insert fragments were assembled by T4 ligation.

### **Vector 33: Pyl tRNA<sub>UCCU</sub>-PyIRS-eGFP(150AGGA)**

Vector generated by digesting **Vector 13** with the restriction enzymes Eco147i and AgeI. Insert generated from restriction digestion of **Vector 22** using Eco147i and AgeI. The vector and insert fragments were assembled by T4 ligation.

### **Vector 34: Pyl tRNA<sub>UCCU(EV1)</sub>-PyIRS-eGFP(150AGGA)**

Vector generated by digestion of **Vector 13** with restriction enzymes Eco147i and AgeI. Insert generated from restriction digestion of **Vector 23** using Eco147i and AgeI. The vector and insert fragments were assembled by T4 ligation.

### **Vector 35: Pyl tRNA<sub>UCCU(EV2)</sub>-PyIRS-eGFP(150AGGA)**

Vector generated by digesting **Vector 13** with restriction enzymes Eco147i and AgeI. Insert generated from restriction digestion of **Vector 24** using Eco147i and AgeI. The vector and insert fragments were assembled by T4 ligation.

### **Vector 36: Pyl tRNA<sub>ACUA</sub>-PyIRS-eGFP(150TAGT)**

Vector generated by digesting **Vector 14** with restriction enzymes Eco147i and AgeI. Insert generated from restriction digestion of **Vector 25** using Eco147i and AgeI. The vector and insert fragments were assembled by T4 ligation.

### **Vector 37: Pyl tRNA<sub>GCUA</sub>-PyIRS-eGFP(150TAGC)**

Vector generated by digesting **Vector 15** with restriction enzymes Eco147i and AgeI. Insert generated from restriction digestion of **Vector 26** using Eco147i and AgeI. The vector and insert fragments were assembled by T4 ligation.

### **Vector 38: Pyl tRNA<sub>CCUA</sub>-PyIRS-eGFP(150TAGG)**

Vector generated by digesting **Vector 16** with restriction enzymes Eco147i and AgeI. Insert generated from restriction digestion of **Vector 27** using Eco147i and AgeI. The vector and insert fragments were assembled by T4 ligation.

### **Vector 39: (U6-Tyr tRNA<sub>CUA</sub>)x2(H1-Tyr tRNA<sub>CUA</sub>)x2 TyrRS\*-eGFP(40TAG)**

This Vector was purchased from Addgene (#50831).

### **Vector 40: Tyr tRNA<sub>CUA</sub>-PyIRS-eGFP(150TAG)**

Vector generated by digesting **Vector 3** with restriction enzymes Eco147i and AgeI. Insert generated via PCR of **Vector 39** using **Primer 22** and **Primer 23**. The vector and insert were combined using Gibson assembly.

### **Vector 41: Tyr tRNA<sub>CUA</sub>-TyrRS\*-eGFP(150TAG)**

Vector generated by digesting **Vector 40** with restriction enzymes NheI and BamHI. Insert generated via PCR of **Vector 39** using **Primer 24** and **Primer 25**. The vector and insert were combined using Gibson assembly.

### **Vector 42: (Pyl tRNA<sub>UCCU</sub>(EV2))x4-PyIRS-eGFP(150AGGA)**

Vector generated by digesting **Vector 35** with Eco147i restriction enzyme. Thermosensitive Alkaline Phosphatase (TAP) was included in reaction mixture to remove 5' and 3' phosphate groups and prevent re-ligation. The three inserts were generated via PCR of **Vector 35** using three distinctive pairs of primers: **Primer 26** and **Primer 27**; **Primer 28** and **Primer 29**; and **Primer 30** and **Primer 31**. The vector and inserts were combined using Gibson assembly.

### **Vector 43: (Tyr tRNA<sub>CUA</sub>)x4-TyrRS\*-eGFP(150TAG)**

Vector generated by digesting **Vector 41** with Eco147i restriction enzyme. Thermosensitive Alkaline Phosphatase (TAP) was included in reaction mixture to remove 5' and 3' phosphate groups and prevent re-ligation. The three inserts were generated via PCR of **Vector**

**41** using three distinctive pairs of primers: **Primer 32** and **Primer 33**; **Primer 34** and **Primer 35**; and **Primer 36** and **Primer 37**. The vector and inserts were combined using Gibson assembly.

**Vector 44: eRF1(E55D)**

This was a kind gift from Jason Chin (Schmied et al., 2014).

**Vector 45: eGFP(40TAG,150AGGA)**

Vector generated by PCR of **Vector 7** using **Primer 38** and **Primer 39**. Insert generated by PCR of **Vector 7** using **Primer 40** and **Primer 41**. The vector and insert were combined using Gibson assembly.

**Vector 46: Pyl tRNA<sub>UCCU(EV2)</sub>-PylRS-eGFP(40TAG,150AGGA)**

Vector generated by digesting **Vector 35** using restriction enzymes BglIII and EcoRI. Insert generated by restriction digest of **Vector 45** using BglIII and EcoRI. Both the vector and insert isolated via TAE agarose gel electrophoresis and gel extraction. The vector and insert fragments were assembled by T4 ligation.

**Vector 47: Tyr tRNA<sub>CUA</sub>-TyrRS\***

Vector generated by digesting **Vector 41** with dual cutter restriction enzyme EcoRI and isolating larger fragment. The DNA was religated via T4 ligation.

**Vector 48: (Pyl tRNA<sub>UCCU(EV2)</sub>)x4-PylRS-eGFP(40TAG,150AGGA)**

Vector generated by digesting **Vector 42** using restriction enzymes BglIII and XbaI. Insert generated by restriction digest of **Vector 45** using BglIII and XbaI. The vector and insert fragments were assembled by T4 ligation.

**Vector 49: (Tyr tRNA<sub>CUA</sub>)x4-TyrRS\*-eGFP(40TAG,150AGGA)**

Vector generated by digesting **Vector 43** using restriction enzymes BglIII and XbaI. Insert generated by restriction digest of **Vector 45** using BglIII and XbaI. The vector and insert fragments were assembled by T4 ligation.

**Vector 50: mCherry**

This was constructed from pCAG-mCherry.

**Vector 51: mCherry-P2A-sGFP(1-10)**

Vector generated by digesting **Vector 50** with restriction enzymes BsrGI and BglIII. Insert composed a gene strings fragment encoding C-terminal residues of mCherry, P2A linker and sfGFP(1-10) and was ordered from GeneArt (ThermoFisher). Vector and insert combined via Gibson assembly.

**Vector 52: sGFP(11)**

This Vector was purchased from GeneArt (ThermoFisher).

**Vector 53: mCherry-P2A-sGFP(11)**

Vector generated by digesting **Vector 51** with MluI and BglIII. Insert generated by digestion of **Vector 52** with MluI and BglIII. Vector and insert were assembled via T4 ligation.

**Vector 54: mCherry-P2A-TAG-sGFP(1-10)**

Vector generated by digesting **Vector 51** with PshAI and BglIII. Insert generated by PCR of **Vector 51** with **Primer 42** and **Primer 43**. The vector and insert were combined using Gibson assembly.

**Vector 55: (Tyr tRNA<sub>CUA</sub>)x4-TyrRS\*-mCherry-P2A-TAG-sGFP(1-10)**

Vector generated by restriction digestion of **Vector 43** using BglIII and XbaI. Insert generated by restriction digest of **Vector 54** with BglIII and XbaI. The vector and insert were combined using T4 ligation.

**Vector 56: (Pyl tRNA<sub>UCCU(EV2)</sub>)x4-PylRS-mCherry-P2A-AGGA-sGFP(11)**

Vector generated by restriction digest of **Vector 42** with XbaI and BglIII. Insert 1 generated by restriction digest of **Vector 51** with PshAI and XbaI. Insert 2 generated by PCR of **Vector 53** using **Primer 44** and **Primer 45**. Insert 2 subjected to restriction digestion with PshAI and BglIII to generate sticky ends. The three fragments were combined by T4 ligation.

**Vector 57: (Tyr tRNA<sub>CUA</sub>)x4-TyrRS\*-sGFP(1-10)-P2A-TAG-sGFP(11)**

Vector generated by digesting **Vector 43** with XbaI and BglIII. Insert 1 generated by PCR of **Vector 53** with **Primer 46** and **Primer 47**. Insert 2 generated by PCR of **Vector 51** with **Primer 48** and **Primer 49**. The three fragments were combined via Gibson Assembly.

**Vector 58: Pyl tRNA<sub>CUA(U25C)</sub>-PylRS-mCherry-P2A-eGFP(150TAG)**

**Vector 3** digested with NheI and BamHI to generate the vector. Insert 1 generated by PCR of **Vector 3** with **Primer 50** and **Primer 51**. Insert 2 generated by PCR of **Vector 51** with **Primer 52** and **Primer 53**. The three fragments were combined via Gibson assembly.

**Vector 59: Pyl tRNA<sub>UCUA</sub>-PylRS-mCherry-P2A-eGFP(150TAGA)**

**Vector 28** digested with EcoRI and BglIII to generate vector. Insert 1 generated by PCR of **Vector 28** with **Primer 50** and **Primer 51**. Insert 2 generated by PCR of **Vector 51** with **Primer 52** and **Primer 53**. The three fragments were combined via Gibson assembly.

**Vector 60: Pyl tRNA<sub>UCUA(EV1)</sub>-PylRS-mCherry-P2A-eGFP(150TAGA)**

**Vector 29** digested with EcoRI and BglIII to generate vector. Insert 1 generated by PCR of **Vector 29** with **Primer 50** and **Primer 51**. Insert 2 generated by PCR of **Vector 51** with **Primer 52** and **Primer 53**. The three fragments were combined via Gibson assembly.

**Vector 61: Pyl tRNA<sub>UCUA(EV2)</sub>-PylRS-mCherry-P2A-eGFP(150TAGA)**

**Vector 30** digested with EcoRI and BglIII to generate vector. Insert 1 generated by PCR of **Vector 30** with **Primer 50** and **Primer 51**. Insert 2 generated by PCR of **Vector 51** with **Primer 52** and **Primer 53**. The three fragments were combined via Gibson assembly.

**Vector 62: Pyl tRNA<sub>CUAG</sub>-PylRS-mCherry-P2A-eGFP(150CTAG)**

**Vector 31** digested with EcoRI and BglII to generate vector. Insert 1 generated by PCR of **Vector 31** with **Primer 50** and **Primer 51**. Insert 2 generated by PCR of **Vector 51** with **Primer 52** and **Primer 53**. The three fragments were combined via Gibson assembly.

**Vector 63: Pyl tRNA<sub>CUAG(EV1)</sub>-PylRS-mCherry-P2A-eGFP(150CTAG)**

**Vector 32** digested with EcoRI and BglII to generate vector. Insert 1 generated by PCR of **Vector 32** with **Primer 50** and **Primer 51**. Insert 2 generated by PCR of **Vector 51** with **Primer 52** and **Primer 53**. The three fragments were combined via Gibson assembly.

**Vector 64: Pyl tRNA<sub>UCCU</sub>-PylRS-mCherry-P2A-eGFP(150AGGA)**

**Vector 33** digested with EcoRI and BglII to generate vector. Insert 1 generated by PCR of **Vector 33** with **Primer 50** and **Primer 51**. Insert 2 generated by PCR of **Vector 51** with **Primer 52** and **Primer 53**. The three fragments were combined via Gibson assembly.

**Vector 65: Pyl tRNA<sub>UCCU(EV1)</sub>-PylRS-mCherry-P2A-eGFP(150AGGA)**

**Vector 34** digested with EcoRI and BglII to generate vector. Insert 1 generated by PCR of **Vector 34** with **Primer 50** and **Primer 51**. Insert 2 generated by PCR of **Vector 51** with **Primer 52** and **Primer 53**. The three fragments were combined via Gibson assembly.

**Vector 66: Pyl tRNA<sub>UCCU(EV2)</sub>-PylRS-mCherry-P2A-eGFP(150AGGA)**

**Vector 35** digested with EcoRI and BglII to generate vector. Insert 1 generated by PCR of **Vector 35** with **Primer 50** and **Primer 51**. Insert 2 generated by PCR of **Vector 51** with **Primer 52** and **Primer 53**. The three fragments were combined via Gibson assembly.

**Vector 67: Pyl tRNA<sub>ACUA</sub>-PylRS-mCherry-P2A-eGFP(150TAGT)**

**Vector 36** digested with EcoRI and BglII to generate vector. Insert 1 generated by PCR of **Vector 36** with **Primer 50** and **Primer 51**. Insert 2 generated by PCR of **Vector 51** with **Primer 52** and **Primer 53**. The three fragments were combined via Gibson assembly.

**Vector 68: Pyl tRNA<sub>CCUA</sub>-PylRS-mCherry-P2A-eGFP(150TAGG)**

**Vector 38** digested with EcoRI and BglII to generate vector. Insert 1 generated by PCR of **Vector 38** with **Primer 50** and **Primer 51**. Insert 2 generated by PCR of **Vector 51** with **Primer 52** and **Primer 53**. The three fragments were combined via Gibson assembly.

**Vector 69: Pyl tRNA<sub>GCUA</sub>-PylRS-mCherry-P2A-eGFP(150TAGC)**

**Vector 37** digested with EcoRI and BglII to generate vector. Insert 1 generated by PCR of **Vector 37** with **Primer 50** and **Primer 51**. Insert 2 generated by PCR of **Vector 51** with **Primer 52** and **Primer 53**. The three fragments were combined via Gibson assembly.

**Vector 70: Pyl tRNA<sub>CUA</sub>-PylRS-mCherry-P2A-eGFP**

**Vector 3** digested with EcoRI and BglII to generate the vector. Insert 1 generated by PCR of **Vector 51** with **Primer 52** and **Primer 53**. Insert 2 generated by PCR of **Vector 4** with **Primer 50** and **Primer 51**. The three fragments were combined via Gibson Assembly.

**Vector 71: Tyr tRNA<sub>CUA</sub>-TyrRS<sup>\*</sup>-mCherry-P2A-eGFP(150TAG)**

**Vector 41** digested with EcoRI and BglII to generate vector. Insert 1 generated by PCR of **Vector 51** with **Primer 52** and **Primer 53**. Insert 2 generated by PCR of **Vector 41** with **Primer 50** and **Primer 51**. The three fragments were combined via Gibson Assembly.

**Vector 72: Tyr tRNA<sub>CUA</sub>-EAziRS-mCherry-P2A-eGFP(150TAG)**

**Vector 71** digested with BamHI and HindIII to generate vector. Insert 1 generated by PCR of **Vector 71** with **Primer 54** and **Primer 55**. Insert 2 generated by PCR of **Vector 71** with **Primer 56** and **Primer 57**. Insert 3 generated by PCR of **Vector 71** with **Primer 58** and **Primer 59**. The three fragments were combined via Gibson Assembly.

**Vector 73: (Pyl tRNA<sub>UCCU</sub> (EV2))x4-PylRS-mCherry-P2A-eGFP(150AGGA)**

**Vector 42** digested with EcoRI and BglII to generate vector. Insert 1 generated by PCR of **Vector 51** with **Primer 52** and **Primer 53**. Insert 2 generated by PCR of **Vector 42** with **Primer 50** and **Primer 51**. The three fragments were combined via Gibson Assembly.

**Vector 74: (Tyr tRNA<sub>CUA</sub>)x4-TyrRS<sup>\*</sup>-mCherry-P2A-eGFP(150TAG)**

**Vector 43** digested with EcoRI and BglII to generate vector. Insert 1 generated by PCR of **Vector 51** with **Primer 52** and **Primer 53**. Insert 2 generated by PCR of **Vector 43** with **Primer 50** and **Primer 51**. The three fragments were combined via Gibson Assembly.

**Transient transfection**

HEK293 cells were plated at a  $1 \times 10^6$  cells per well of a 24 well plate (Corning, #10380932) in DMEM (Fisher Scientific, #11574516) supplemented with 10% (v/v) FBS (Fisher Scientific, #11573397) and maintained at 37 °C in a high-humidity 5% CO<sub>2</sub> atmosphere for 24 h or until 90% confluent. For transfection, per well, 1.5 μL Lipofectamine 2000 (Life Technologies, #10696343) was suspended in 50 μL Opti-MEM (Fisher Scientific, #11058021), and incubated for 10 min at room temperature. 500 ng of Vector was diluted in 50 μL Opti-MEM and mixed with the lipofectamine/Opti-MEM solution to a final volume of 100 μL and incubated for 30 minutes at room temperature. Media in each well was exchanged for fresh DMEM/10% FBS and, when appropriate, supplemented with 100 mM stock of Bock (Fluorochem, #078520) and/or AzF (Bachem, #4020250) or OMeY (Alfa Aesar, #H63096) to final working concentrations of 1 mM. Vector-lipofectamine solution was then added drop-wise to the well, and the plate incubated at 37 °C in a high-humidity 5% CO<sub>2</sub> atmosphere for 48 h.

**Imaging**

Cells were imaged using Zeiss AxioCam MRm microscope camera and ZEN (version 2.3) computer imaging programme. All images were taken at 200X magnification, and representative regions of the entire well were captured. GFP fluorescence was detected with Zeiss FSet 38 green fluorescence filter (excitation 470/40 and emission 525/50), with a constant exposure of 550 ms per image. mCherry fluorescence was detected with Zeiss FSet 45 (excitation 560/40 and emission 630/75), with a constant



exposure of 550 ms per image. To analyse dual-fluorescence reporters, GFP and mCherry fluorescent images were composited and the resulting images annotated as 'Merge'.

### Flow cytometry

After transfection, media was aspirated from wells and cells washed with 100  $\mu$ L DPBS. Then, 50  $\mu$ L of trypsin was added to each well and the plate incubated at 37 °C, 5% CO<sub>2</sub> for 5 minutes. The plate was sharply tapped to ensure cellular detachment and cells were resuspended in 450  $\mu$ L DPBS and filtered through a CellTrics® 50  $\mu$ M filter (Sysmex #04-0042-2317) into a round-bottom flow cytometry tube. Flow cytometry was performed using an S3e cell sorter (Bio-Rad). For each condition, acquisition was allowed to continue until at least 10,000 mCherry-positive cells had been analysed (see [quantification and statistical analysis](#)). Each experiment was performed in triplicate.

### Immunoblotting

Immediately following microscopical analysis the media was removed from wells and cells washed twice with 1x PBS. 50  $\mu$ L of RIPA Buffer (Sigma-Aldrich, #R0278) containing 1% v/v protease inhibitor cocktail (Sigma-Aldrich, #P8340) was added dropwise to the centre of the well and plate incubated on ice for 10 minutes. Cells were then scraped from the surface of the well, and all contents transferred to a 1.5 mL Eppendorf tube. Lysates were pelleted (20,000 g, 10 min, 4 °C) and supernatant (45  $\mu$ L) added to 15  $\mu$ L NuPAGE™ LDS Sample Buffer (Invitrogen, #NP0007). Samples were heated (95 °C, 5 min) and loaded onto a Novex™ WedgeWell™ 4-20% Tris-Glycine 1.0 mm Mini Protein Gel (Invitrogen, #XP04205BOX) for electrophoresis. The gel was transferred to a nitrocellulose membrane using a Trans-Blot Turbo Transfer System (Bio-Rad), stained with Ponceau S to confirm protein transfer and imaged on a ChemiDoc XRS + (Bio-Rad). Once imaged, membranes were blocked with PBST (0.05% [v/v] Tween 20 in PBS) containing 5% (w/v) milk powder at 16 °C for 1 h, and then incubated (4 °C, overnight) with primary mouse anti-eGFP antibody (ThermoFisher, #MA1-952, 1:500 [v/v] dilution). The membrane was then washed three times (10 mL PBST, 5 min per wash). All subsequent washing steps used this procedure. Membranes were incubated in secondary anti-mouse antibody (ThermoFisher, #32430, 1:1000 [v/v] dilution) for 1 h at 16 °C, and then washed. The signal was developed by addition of Clarity Max™ Western ECL Substrate (Bio-Rad, #1705062). After imaging on a ChemiDoc XRS + system, the membrane was washed 5 times (10 mL PBST, 5 min per wash) and then incubated (4 °C, overnight) with either mouse anti-GAPDH antibody (ThermoFisher, #MA5-15738, 1:500 [v/v] dilution) or mouse anti-FLAG (Sigma-Aldrich, #F3165, 1:500 [v/v] dilution) before being incubated with the secondary anti-mouse antibody and processed again for imaging as described above.

## QUANTIFICATION AND STATISTICAL ANALYSIS

Flow cytometry data was analysed with FlowJo (version 10.7.2, BD Biosciences). Events were gated to ensure only mCherry-positive, single cells were used for quantification purposes. This was achieved by gating for single cells, excluding debris (FSC-A vs SSC-A) and gating to exclude doublets (FSC-A vs FSC-H and SSC-A vs SSC-H). Cells were gated for transfected cells by excluding mCherry negative cells (mCh-A vs FSC-A). Finally, mCherry fluorescence was plotted against eGFP fluorescence and the mean fluorescence intensities were taken to calculate the incorporation efficiency using the formula ([Bartoscsek et al., 2021](#)):

$$\text{Incorporation efficiency} = \left( \frac{eGFP}{mCh} \Big/ \frac{WT eGFP}{WT mCh} \right) - \left[ \frac{eGFP}{mCh} \Big/ \frac{WT eGFP}{WT mCh} \right]$$

Where ( ) and [ ] indicate samples incubated with and without the designated unnatural amino acid, respectively. Each condition was performed in triplicate (i.e. transient transfection of cells of different passages and split at different time). Data of each replicate containing over 10,000 mCherry positive cells were used to calculate the incorporation efficiency. Average incorporation efficiency was calculated from the three replicates for each condition and are provided in bar charts in [Figures 2D, 3D, and 3E](#). The standard deviation from the means were also calculated and are represented as error bars on [Figures 2D, 3D, and 3E](#) and after  $\pm$  symbols in [Figures 3A and 3B](#). In the results, when directly comparing incorporation efficiencies between two vectors, an independent two-tailed t-test assuming equal variances was used. Incorporation efficiency, average incorporation efficiency, standard deviation from the mean and t-test calculations were performed in Microsoft Excel.

**Cell Reports Methods, Volume 1**

**Supplemental information**

**Development of mammalian cell logic gates  
controlled by unnatural amino acids**

**Emily M. Mills, Victoria L. Barlow, Arwyn T. Jones, and Yu-Hsuan Tsai**

## Table of Contents

|                                                                                                                                                             |    |
|-------------------------------------------------------------------------------------------------------------------------------------------------------------|----|
| 1. Supplementary Figures .....                                                                                                                              | 2  |
| Figure S1. Production of eGFP(150XXXX) using different Pyl tRNA variants. Related to Figure 2. ....                                                         | 2  |
| Figure S2. Utilisation of TyrRS*/tRNA <sub>CUA</sub> as the second orthogonal pair. Related to Figure 3. ....                                               | 3  |
| Figure S3. Incorporation of AzF and BockK into a single eGFP using Tyr tRNA <sub>CUA</sub> and Pyl tRNA <sub>UCCU(EV2)</sub> . Related to STAR Methods..... | 4  |
| Figure S4. Logic gate vector specificity test. Related to Figure 4.....                                                                                     | 5  |
| 2. Methods S1 .....                                                                                                                                         | 6  |
| 2.1 Table S1. Primers used in this study. Related to STAR methods. ....                                                                                     | 6  |
| 2.2 Working vector sequences. Related to STAR methods. ....                                                                                                 | 7  |
| 2.2.1 Vector 1: Pyl tRNA <sub>CUA</sub> (U25C).....                                                                                                         | 7  |
| 2.2.2 Vector 55: 4x(Tyr tRNA <sub>CUA</sub> ) TyrRS* mCherry-P2A-TAG-sGFP(1-10).....                                                                        | 8  |
| 2.2.3 Vector 56: 4x(Pyl tRNA <sub>UCCU(EV2)</sub> ) PylIRS mCherry-P2A-AGGA-sGFP(11) .....                                                                  | 11 |
| 2.2.4 Vector 57: 4x(Tyr tRNA <sub>CUA</sub> ) TyrRS* sGFP(1-10)-TAG-sGFP(11).....                                                                           | 13 |
| 2.2.5 Vector 58: Pyl tRNA <sub>CUA(U25C)</sub> PylIRS mCherry-P2A-eGFP(150TAG) .....                                                                        | 15 |
| 2.2.6 Vector 59: Pyl tRNA <sub>UCUA</sub> PylIRS mCherry-P2A-eGFP(150TAGA) .....                                                                            | 17 |
| 2.2.7 Vector 60: Pyl tRNA <sub>UCUA(EV1)</sub> PylIRS mCherry-P2A-eGFP(150TAGA) .....                                                                       | 19 |
| 2.2.8 Vector 61: Pyl tRNA <sub>UCUA(EV2)</sub> PylIRS mCherry-P2A-eGFP(150TAGA) .....                                                                       | 21 |
| 2.2.9 Vector 62: Pyl tRNA <sub>CUAG</sub> PylIRS mCherry-P2A-eGFP(150CTAG) .....                                                                            | 23 |
| 2.2.10 Vector 63: Pyl tRNA <sub>CUAG(EV1)</sub> PylIRS mCherry-P2A-eGFP(150CTAG).....                                                                       | 25 |
| 2.2.11 Vector 64: Pyl tRNA <sub>UCCU</sub> PylIRS mCherry-P2A-eGFP(150AGGA) .....                                                                           | 27 |
| 2.2.12 Vector 65: Pyl tRNA <sub>UCCU(EV1)</sub> PylIRS mCherry-P2A-eGFP(150AGGA) .....                                                                      | 29 |
| 2.2.13 Vector 66: Pyl tRNA <sub>UCCU(EV2)</sub> PylIRS mCherry-P2A-eGFP(150AGGA) .....                                                                      | 31 |
| 2.2.14 Vector 67: Pyl tRNA <sub>ACUA</sub> PylIRS mCherry-P2A-eGFP(150TAGT) .....                                                                           | 33 |
| 2.2.15 Vector 68: Pyl tRNA <sub>CCUA</sub> PylIRS mCherry-P2A-eGFP(150TAGG) .....                                                                           | 35 |
| 2.2.16 Vector 69: Pyl tRNA <sub>GCUA</sub> PylIRS mCherry-P2A-eGFP(150TAGC) .....                                                                           | 37 |
| 2.2.17 Vector 71: Tyr tRNA <sub>CUA</sub> TyrRS* mCherry-P2A-eGFP(150TAG).....                                                                              | 39 |
| 2.2.18 Vector 73: 4x(Pyl tRNA <sub>UCCU(EV2)</sub> ) PylIRS mCherry-P2A-eGFP(150AGGA) .....                                                                 | 41 |
| 2.2.19 Vector 74: 4x(Tyr tRNA <sub>CUA</sub> ) TyrRS* mCherry-P2A-eGFP(150TAG).....                                                                         | 43 |

# 1. Supplementary Figures

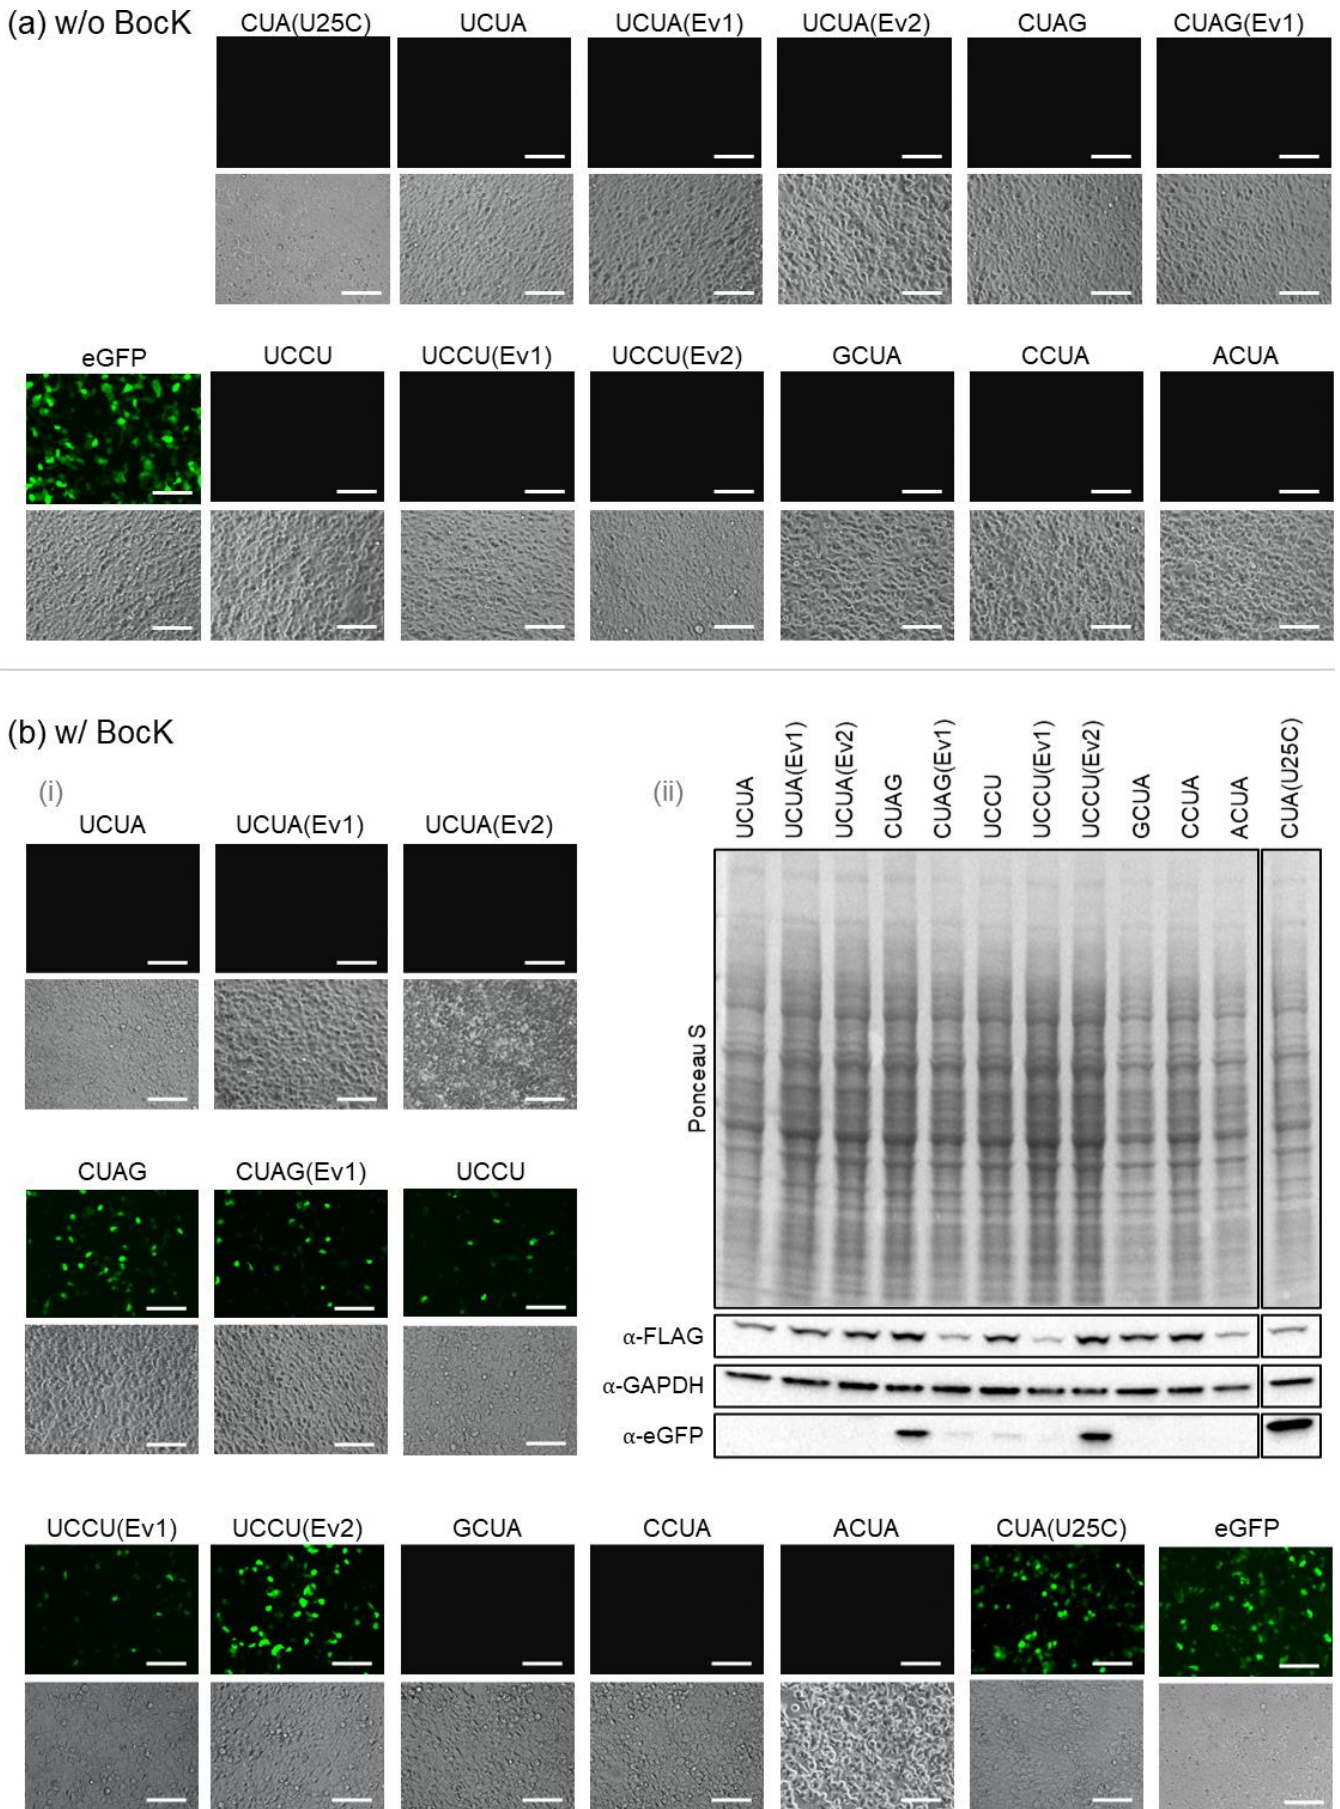

**Figure S1. Production of eGFP(150XXXX) using different Pyl tRNA variants.** Related to Figure 2. HEK293 cells were transiently transfected with the designated evaluation vector encoding the wild-type *M. mazei* PylRS, a Pyl tRNA variant and an eGFP reporter with the appropriate quadruplet codon at the position for the 150<sup>th</sup> amino acid residue in the absence (a) or presence (b) of 1 mM BocK for 24 h. No GFP fluorescence was detected for any of the variants when BocK was not supplemented. Transfection with a vector carrying the wild-type eGFP was used as the positive control. Bright field images show cell confluency in each condition. All images are 223  $\mu\text{m} \times 167 \mu\text{m}$ , scale bars denote 50  $\mu\text{m}$ . Immunoblotting with  $\alpha$ -FLAG and  $\alpha$ -GFP antibodies were used to detect PylRS and full-length eGFP, respectively. An irrelevant lane was digitally deleted from the blot and is indicated by the gap between ACUA and CUA(U25C).

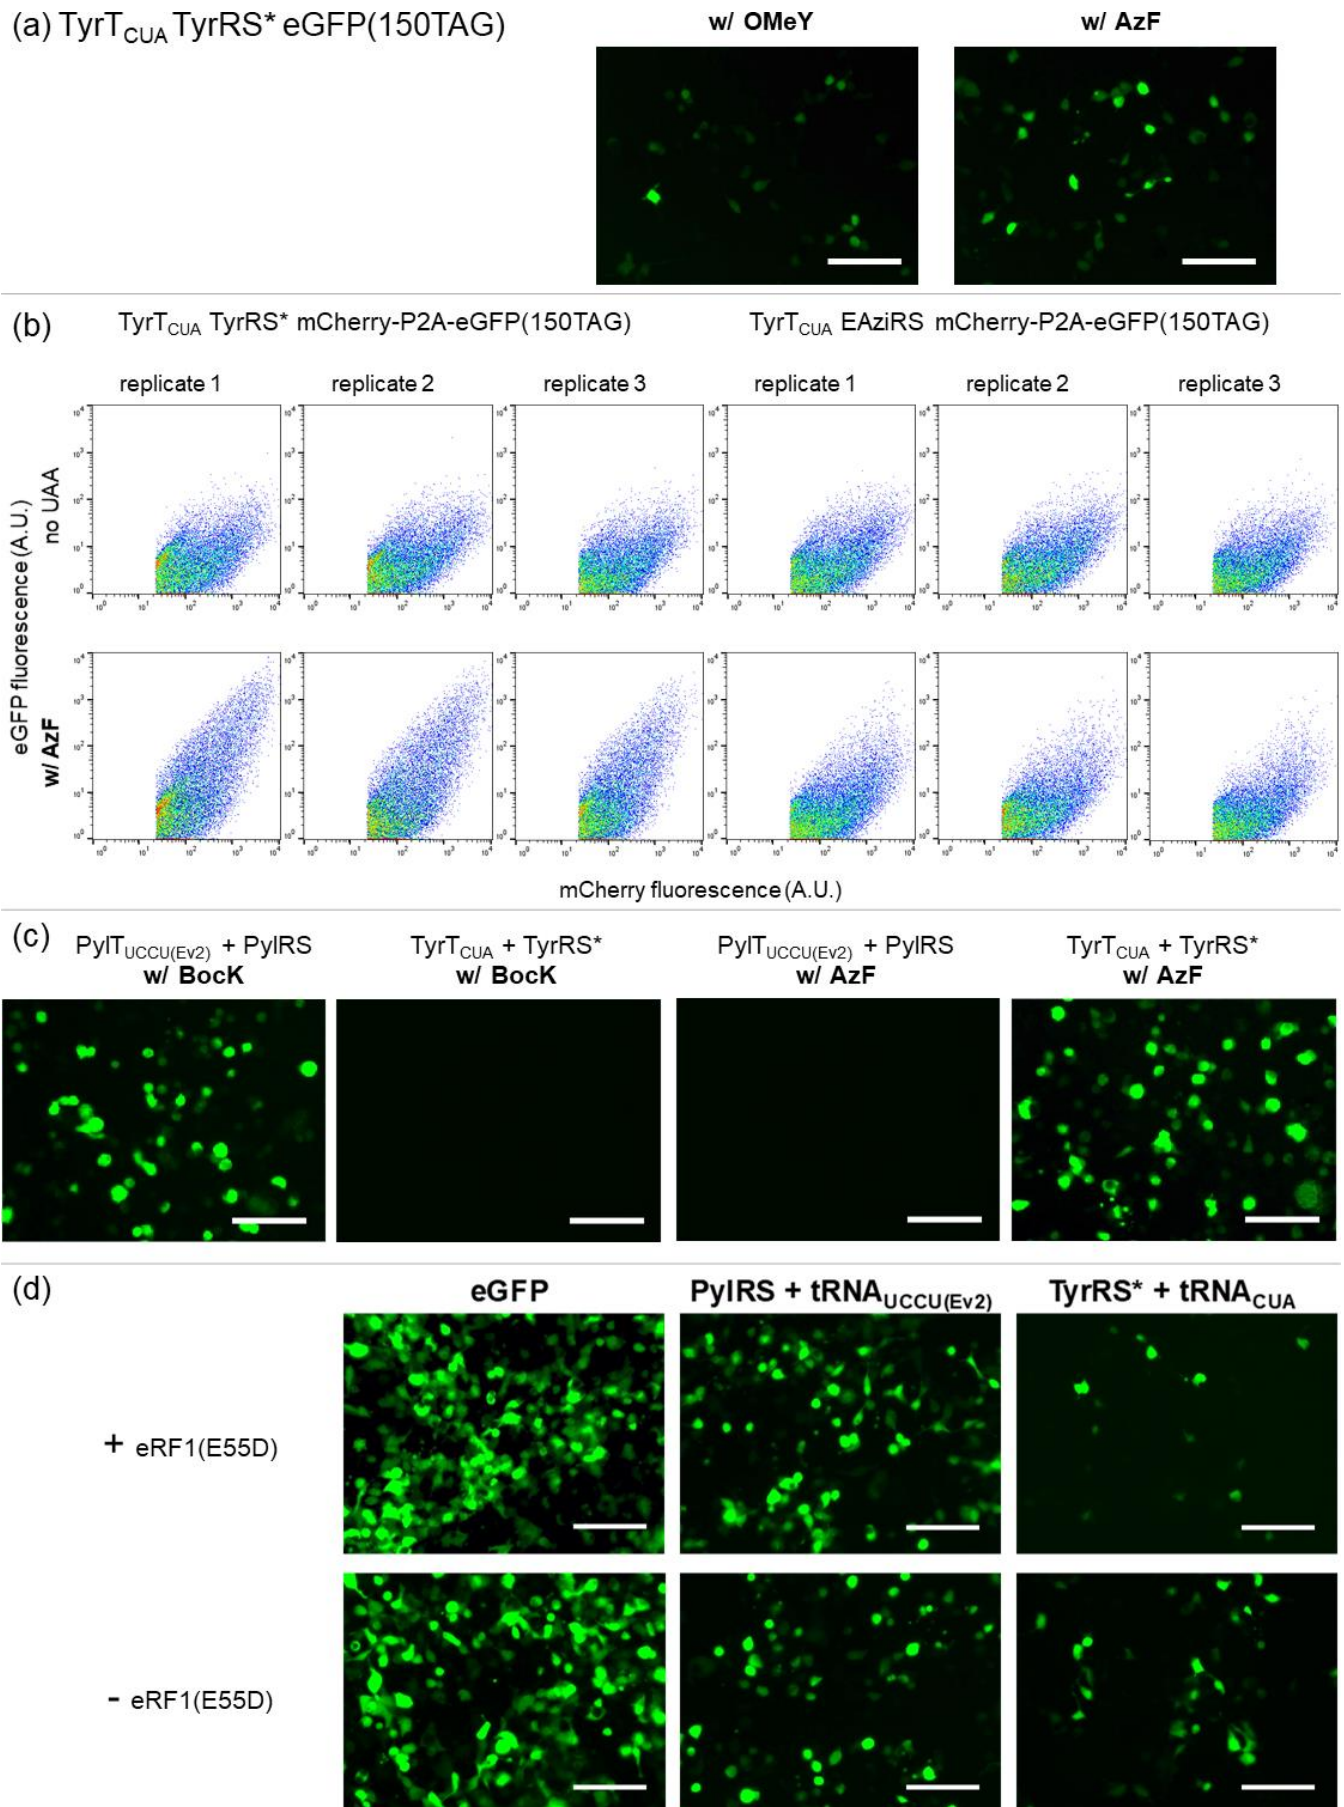

**Figure S2. Utilisation of TyrRS\*/tRNA<sub>CUA</sub> as the second orthogonal pair. Related to Figure 3.** (a) Incorporation of OMeY and AzF into eGFP(150TAG) with TyrRS\*. Fluorescence microscopy images of OMeY and AzF incorporation into the 150<sup>th</sup> amino acid position of eGFP demonstrate higher levels of eGFP fluorescence when AzF is incorporated. (b) Flow cytometry analysis of incorporation of AzF into eGFP(150TAG) by TyrRS\* or EAziRS. HEK293 cells transfected with TyrT<sub>CUA</sub> TyrRS\* mCherry-P2A-eGFP(150TAG) or TyrT<sub>CUA</sub> EAziRS mCherry-P2A-eGFP(150TAG) were incubated in the absence or presence of AzF for 48 hours before flow cytometry analysis. Events were gated for HEK293 cells and to exclude doublets. Cells were then gated to include only transfected (i.e. mCherry positive) cells. Fluorescence intensities are given in arbitrary units (A.U.). Three biological replicates for each condition are shown. The mean fluorescence intensities were used to calculate the incorporation efficiency as per the equation in Figure 2. The incorporation efficiency is 8% ± 2% for TyrT<sub>CUA</sub> TyrRS\* mCherry-P2A-eGFP(150TAG), and 0.6% ± 0.3% for TyrT<sub>CUA</sub> EAziRS mCherry-P2A-eGFP(150TAG). (c) Orthogonality of tRNA/aaRA pairs. HEK293 cells transfected with PyIRS/tRNA<sub>UCCU(EV2)</sub> or TyrRS\*/tRNA<sub>CUA</sub> reporter vector and incubated for 24 hours in the presence of AzF or BockK, respectively. Fluorescent eGFP was only

detected when the aaRS/tRNA pairs were in the presence of their cognate unnatural amino acid depicting mutual orthogonality of the pairs. (d) Impact of eRF1(E55D) on incorporation efficiency of TyrRS\*/tRNA<sub>CUA</sub> or PylRS/tRNA<sub>UCCU(EV2)</sub>. No substantial increase in eGFP fluorescence was observed. eRF1(E55D) was also expressed alongside wildtype eGFP as a control. All fluorescent images are 223 μm × 167 μm, scale bars denote 50 μm.

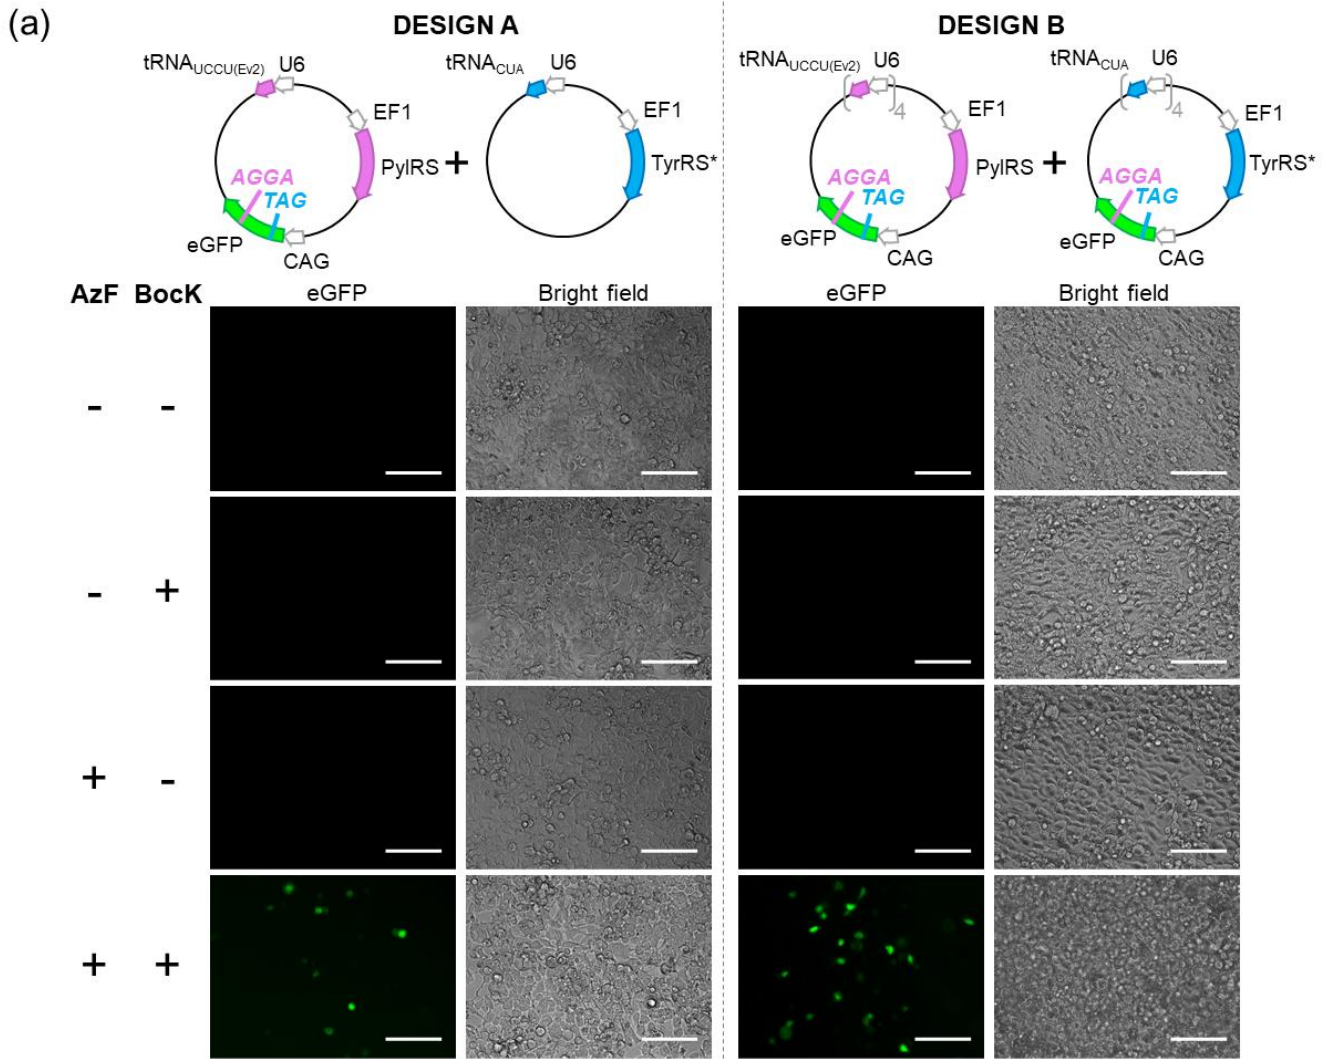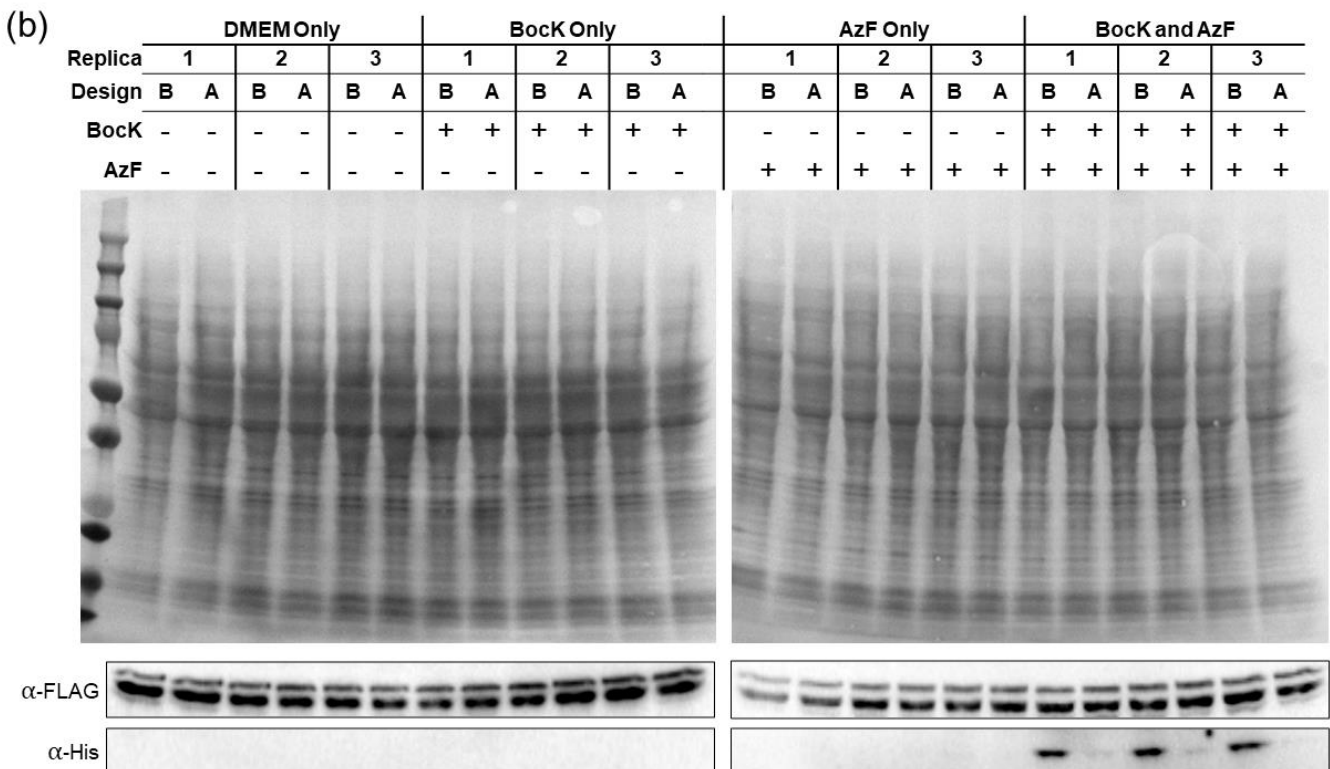

**Figure S3. Incorporation of AzF and BocK into a single eGFP using Tyr tRNA<sub>CUA</sub> and Pyl tRNA<sub>UCCU(EV2)</sub>. Related to STAR Methods.** (a) AzF was incorporated at the 40<sup>th</sup> residue of the mutant eGFP using amber suppression and BocK was incorporated into the 150<sup>th</sup> residue of the eGFP mutant using AGGA suppression. Double incorporation was investigated with two experimental designs: Design A comprised of a single reporter gene and tRNA for respective pairs, Design B an attempt at optimisation with increased tRNA and reporter copy number. eGFP fluorescence was only detected when cells were supplemented with both AzF and

BocK, Design B demonstrated higher levels of eGFP fluorescence. (b) Western blot of Design A vs Design B with three biological replicates of 4 conditions: (1) no unnatural amino acid, (2) BocK only, (3) AzF only and (4) BocK and AzF. Full length eGFP was only detected when both unnatural amino acids are supplemented, with Design B yielding substantially higher eGFP band intensity. All fluorescent images are 223  $\mu\text{m} \times 167 \mu\text{m}$ , scale bars denote 50  $\mu\text{m}$ .

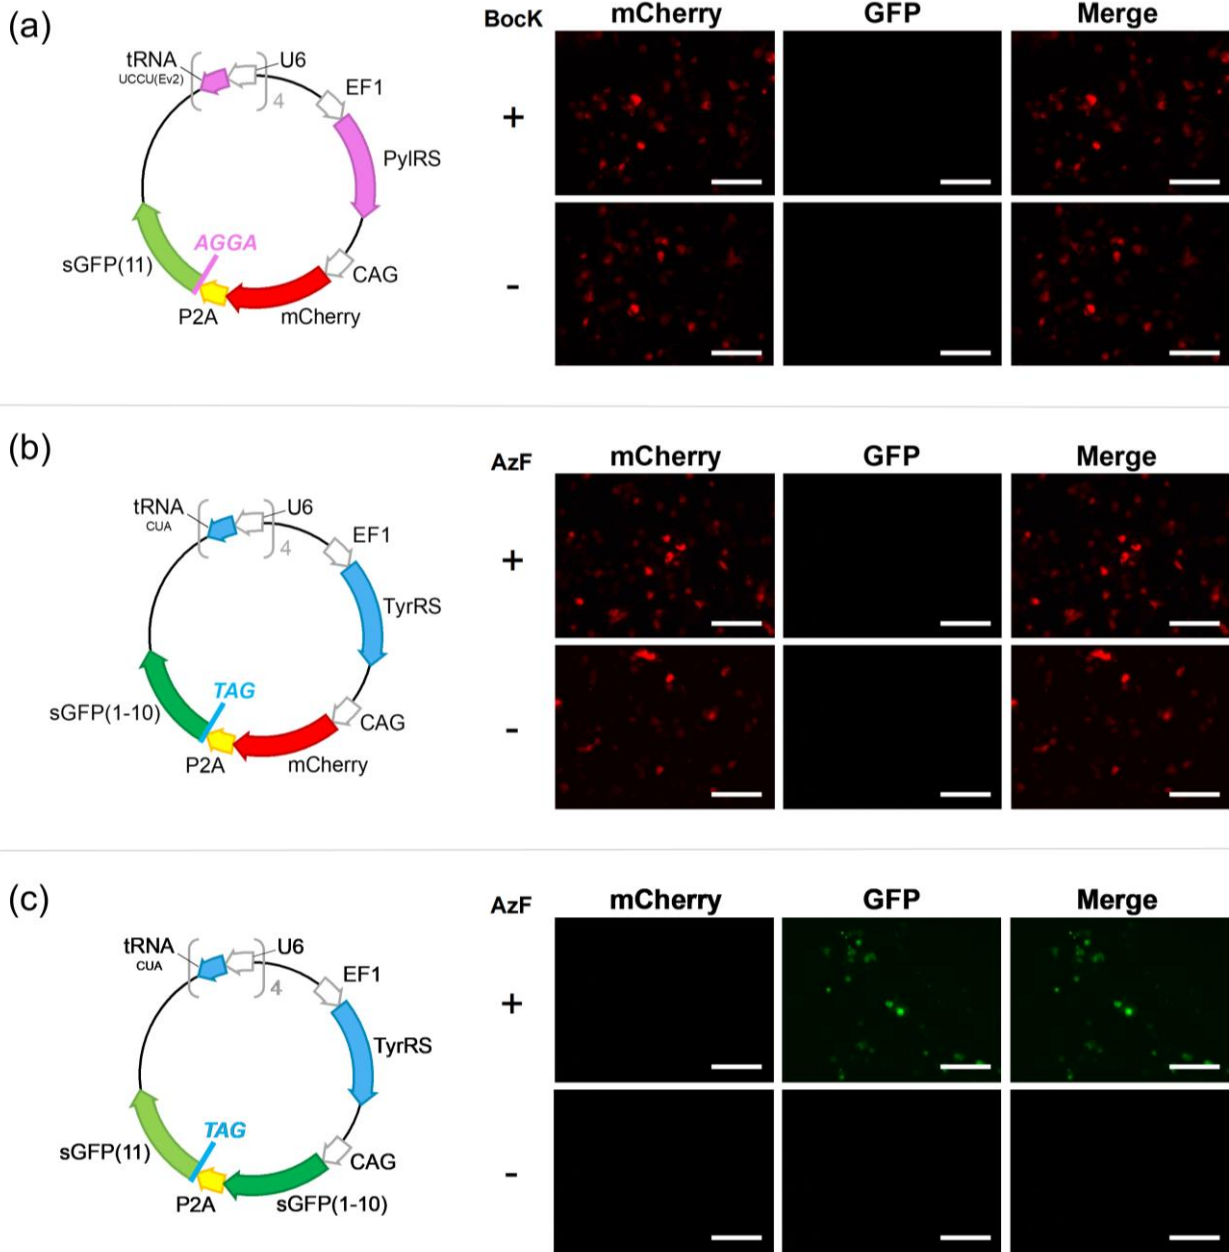

**Figure S4. Logic gate vector specificity test. Related to Figure 4.** (a-c) Individual transfection of logic gate vectors in the presence (+) or absence (-) of their respective unnatural amino acid (BocK or AzF) at 1 mM. All images depicted are 223  $\mu\text{m} \times 167 \mu\text{m}$ , scale bars denote 50  $\mu\text{m}$ .

## 2. Methods S1

2.1 Table S1. Primers used in this study. Related to STAR methods.

| Primer ID | Primer sequence (5'-3')                                                           |
|-----------|-----------------------------------------------------------------------------------|
| Primer 1  | GGGGGATACGGGGAAAAGGCCTAAAAACCGCACTTGTCCGAAAC                                      |
| Primer 2  | GGTCAGGGCTGGGGCAGAGGCTTGCACAGGGGCAGACATG                                          |
| Primer 3  | ATCATGGCTGATAAGCAGAAGAAC                                                          |
| Primer 4  | CGTTCTTCTGCTTATCAGCCATGATATAGACTCTAGTGGCTGTTGTAGTTGACTCCAGCTTG                    |
| Primer 5  | CGTTCTTCTGCTTATCAGCCATGATATAGACTCTAGTGGCTGTTGTAGTTGACTCCAGCTTG                    |
| Primer 6  | CGTTCTTCTGCTTATCAGCCATGATATAGACTCTGTGGCTGTTGTAGTTGACTCCAGCTTG                     |
| Primer 7  | CGTTCTTCTGCTTATCAGCCATGATATAGACTCTAGTGGCTGTTGTAGTTGACTCCAGCTTG                    |
| Primer 8  | CGTTCTTCTGCTTATCAGCCATGATATAGACTCTAGTGGCTGTTGTAGTTGACTCCAGCTTG                    |
| Primer 9  | CGTTCTTCTGCTTATCAGCCATGATATAGACTCTAGTGGCTGTTGTAGTTGACTCCAGCTTG                    |
| Primer 10 | TTCGATCTACATGATCAGGTTTCCGGTG                                                      |
| Primer 11 | ACCTGATCATGTAGATCGAATGGACTTCTAAATCCGTTCCAGCCGGGTTAGATTCC                          |
| Primer 12 | ACCTGATCATGTAGATCGAATGGGCTTCTAATCTCGTTCCAGCCGGGTTAGATTCC                          |
| Primer 13 | ACCTGATCATGTAGATCGAATGGGCTTCTAATCCGTTCCAGCCGGGTTAGATTCC                           |
| Primer 14 | ACCTGATCATGTAGATCGAATGGACTCTAGAATCCGTTCCAGCCGGGTTAGATTCC                          |
| Primer 15 | ACCTGATCATGTAGATCGAATGGCCTCTAGAATCCGTTCCAGCCGGGTTAGATTCC                          |
| Primer 16 | ACCTGATCATGTAGATCGAATGGACTTCTAATCCGTTCCAGCCGGGTTAGATTCC                           |
| Primer 17 | ACCTGATCATGTAGATCGAATCCTCTTCTAATAGGTTCCAGCCGGGTTAGATTCC                           |
| Primer 18 | ACCTGATCATGTAGATCGAAGGGGCTTCTATCCGTTCCAGCCGGGTTAGATTCC                            |
| Primer 19 | ACCTGATCATGTAGATCGAATGGACTACTAAATCCGTTCCAGCCGGGTTAGATTCC                          |
| Primer 20 | ACCTGATCATGTAGATCGAATGGACTGCTAAATCCGTTCCAGCCGGGTTAGATTCC                          |
| Primer 21 | ACCTGATCATGTAGATCGAATGGACTCCTAAATCCGTTCCAGCCGGGTTAGATTCC                          |
| Primer 22 | GAAAAGGAGGCTACATGCAAATATTAATAAATGGTGGGGGAAGGATTGCAACCTTC                          |
| Primer 23 | ACCGGAGCGATCGCAACCGGTCGGGCAGGAAGAGGGCCTATTTCCAT                                   |
| Primer 24 | ACTTACGCTTGCCACCATGGCTAGCGACTACAAGGACGACGACGACAAGGCAAGCAGTAACCTGATTAACAATTGCAAGAG |
| Primer 25 | TCCACCACACTGGACTAGTGGATCCTTATCATTAAACGGGCCCTTCCAGCAAATC                           |
| Primer 26 | GGGGGATACGGGGAAAAGGCCTCTTAAGAAAACCGCACTTGTC                                       |
| Primer 27 | GTAACGCCACAAGTTCGTCGATTGGGCAGGAAGAGGGCCTATTTTC                                    |
| Primer 28 | TCGACGAACTTGTGGCCGTTTACCCTCTTAAGAAAACCGCACTTGTC                                   |
| Primer 29 | CTGGTGGAGAACTTGCCGAATTGGGCAGGAAGAGGGCCTATTTTC                                     |
| Primer 30 | TTCGGCAAGTTCCTCACCAGCCTCTTAAGAAAACCGCACTTGTC                                      |
| Primer 31 | AGTGCAGTTTTTCTTAAGAGGTTGGGCAGGAAGAGGGCCTATTTTC                                    |
| Primer 32 | GGATACGGGGAAAAGGAGGCCTACATGC                                                      |
| Primer 33 | GTAACGCCACAAGTTCGTCGATTGGGCAGGAAGAGGGCCTATTTTC                                    |
| Primer 34 | TCGACGAACTTGTGGCCGTTTACCATGCAAATATTAATAAATGGTGGGGGAAG                             |
| Primer 35 | CTGGTGGAGAACTTGCCGAATTGGGCAGGAAGAGGGCCTATTTTC                                     |



|           |                                                                                             |
|-----------|---------------------------------------------------------------------------------------------|
| Primer 36 | AATTCGGCAAGTTCTCCACCAGACATGCAAATATTAATAAATGGTGGGGGAAG                                       |
| Primer 37 | TTTTAATATTTGCATGTAGGGGGCAGGAAGAGGGCCTATTTTC                                                 |
| Primer 38 | AGGGTCAGCTTGCCCTAGGTGGCATCG                                                                 |
| Primer 39 | TCGGCATGGACGAGCTGTACAAGCATCATCACCATCACCCTAAGCTGCCTATCAGAAG                                  |
| Primer 40 | ATGCCACCTAGGGCAAGCTGACCTGAAGTTC                                                             |
| Primer 41 | TTGTACAGCTCGTCCATGCCGAGAG                                                                   |
| Primer 42 | AGAACCTGGACCTGGACAAAAG TCGTAGTCCAAAGGAGAAGAAGTGTACCGGTGTTG                                  |
| Primer 43 | TCCCCATAATTTTTGGCAGAGGGAAAAAGATCTC                                                          |
| Primer 44 | GAGAACCCTGGACCTGGACAAAAGTCGAGGACGTGAC CACATGGTCTTCATG                                       |
| Primer 45 | TTTTTGGCAGAGGGAAA AAGATCTCACATG                                                             |
| Primer 46 | TTCAGCTGCTGAAACAGGCTGGCGACGTGGAAGAGAACCCTGGACCTGGACAAAAGTCGTAGCGTGACCACATGGTCTTCATG         |
| Primer 47 | TTTTTGGCAGAGGGAAAAAGATCTCACATG                                                              |
| Primer 48 | TGTCTCATATTTTTGGCAAAGAATTCATGTCCAAAGGAGAAGAAGTGTACCT                                        |
| Primer 49 | TTCTCTCCACGTCGCCAGCCTGTTTCAGCAGGCTGAAATGGTGGCGCCTCCAGACGCTTTTTTCATTTGGATCTTTGCTCAGGACTGTTTG |
| Primer 50 | AGCAAGGGCGAGGAGCTG                                                                          |
| Primer 51 | TGTCCCCATAATTTTTGGCAGAGGGAAAAAGATCTTTACTTGTACAGCTCGTCCATGCCGAGAG                            |
| Primer 52 | GTCTCATCATTTTTGGCAAAGAATTCGCCACCATGGTGAGCAAGGGCGAG                                          |
| Primer 53 | AACAGCTCCTCGCCTTGTCTACCGACTTTTGTCCAGGTCCAGG                                                 |
| Primer 54 | TGCCGCCAGAACACAGCTGAAGC                                                                     |
| Primer 55 | GAGTGCATCGGGCCTTGC                                                                          |
| Primer 56 | CGCAAGGCCGATCGACTCCTGTGTGGCTTCGATCCTACCGCTGAC                                               |
| Primer 57 | ACTATAACCCTGCAGCAGGTTG                                                                      |
| Primer 58 | ACCTGCTGCAGGTTATAGTGCCGCTGTGCCAACAAACAGTACGGTGTGGTGC                                        |
| Primer 59 | TCCACCACACTGGACTAGTGATCCTTATCATTAAACGGGCCCTTCCAGC                                           |

## 2.2 Working vector sequences. Related to STAR methods.

Vector 1 has **kanamycin** resistance; all other vectors have **ampicillin** resistance. Gene sequences are colour-coded using the following: **U6 promoter**, **PyIT** (anticodon **highlighted**), **EF1 promoter**, **PyIRS**, **CAG promoter and chimeric intron**, **eGFP** (150<sup>th</sup> codon **highlighted**), **TyrT** (anticodon **highlighted**), **TyrRS**, **mCherry**, linker, **P2A**, **sGFP(1-10)**, **sGFP(11)7x** (AGGA/TAG codon **highlighted**)

### 2.2.1 Vector 1: Pyl tRNA<sup>CUA(U25C)</sup>

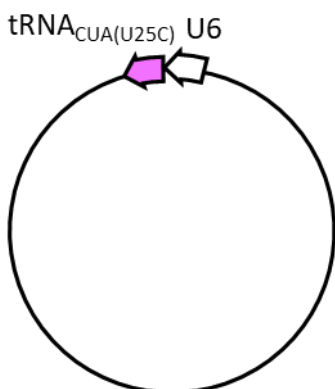

CTAAATTGTAAGCGTTAATATTTTTGTTAAAATTCGCGTTAAATTTTTGTTAAATCAGCTCATTTTTTAACCAATAGGCCGAAATCGGC  
 AAAATCCCTTATAAATCAAAGAATAGACCGAGATAGGGTTGAGTGGCCGCTACAGGGCGCTCCCATTGCGCATTAGGCTGCG  
 CAACTGTTGGGAAGGGCGTTTTCGGTGCGGGCCTTTCGCTATTACGCCAGCTGGCGAAAAGGGGGATGTGCTGCAAGGCGATTA  
 AGTTGGGTAACGCCAGGGTTTTCCAGTCACGACGTTGTAACGACGGCCAGTGAGCGCGACGTAATACGACTCACTATAGGG  
 CGAATTGAAGGAAGGCCGTCAAGGCCGCATAGGCCTCTTAAGAAAAACCGCACTTGTCC**CGAAACCCCGGGAATCTAACCCGG**  
**CTGAACGGATTAGAGTCCGTTGATCTACATGATCAGGTTCC**GGTGTTC**GTCC**TTTCCACAAGATATATAAAGCCAAGAAAT  
 CGAAACTTTTCAAGTTACGGTAAGCATATGATAGTCCATTTTAAAACATAATTTTAAAACCTGCAAACCTACCAAGAAATTTACTT  
 TCTACGTCACGATTTTTGTACTAATATCTTTGTGTTTACAGTCAAATTAATTTCTAATTTATCTCTCTAACAGCCTTGATATGATGCG  
 AAATATGAAGGAATCATGGGAAATAGGCCCTTTCCTGCCAACCGGTTGCGATCGCTCCGGTGCCCGTCACT**GGGCAGAGCG**  
**CACATCGCCACAGTCCCGGAGAAGTTGGGGGGAGGGGTGCGCAATTGAACGGGTGCCTAGAGAAGGTGGCGCGGGGTAAC**  
**TGGGAAAGTGATGTCGTGACTGGCTCCGCCTTTTTCCCGAGGGTGGGGGAGAACCCTATATAAGTGCAGTAGTCGCCCGTGAAC**  
**GTTCTTTTTCGCAACGGGTTTGGCGCCAGAACACAG**CTGAAGCTTCGAGGGGCTCGCATCTCTCCTTACGCGCCCCGCCCT  
 ACCTGAGGCCGCATCCACGCGGTTGAGTCGCGTTCGCGCCTCCCGCCTGTTGGTGCCTCTGAACTGCGTCCGCGCTCA  
 GGTAAGTTTAAAGCTCAGGTCGAGACCGGGCCTTTGTCCGGCGCTCCCTTGGAGCCTACCTAGACTCAGCCGGCTCTCCACGC  
 TTTGCCTGACCCTGCTTGTCAACTCTACGTCTTTGTTTCTGTTCTGCGCCGTTACAGATCCAAGCTGTGACCGGGCGC  
 TACTCTACAGATAGCGTTTAAACTTACGCTTGCCACCATGGCTAGCGCGGCCGACAGTACCAGGAAAGCGGAGCTACTAATTCAG  
 CCTGCTGAAGCAGGCTGGAGACCTGGAGGAGAACCCTGGACCTGACAAGAAGCCCCTGAACACCCTGATCAGCGCCACAGGA  
 CTGTGGATGCCAGAACCAGCACCATCCACAAGATCAAGCACCACGAGGTGTCCCGTCCAAAATCTACATCGAGATGGCCTGC  
 GGCGATCACCTGGTCTCAACAACAGCAGAAGCAGCCGGACAGCCAGAGCCCTGCGGCACCACAAGTACAGAAAGACCTGCAA  
 GCGGTGCAGAGTGTCCGACGAGGACCTGAACAAGTTCCTGACCAAGGCCAACGAGGACCAGACCAGCGTGAAAGTGAAGGTG  
 GTGTCCGCCCCACCCGGACCAAGAAAGCCATGCCAAAGAGCGTGGCCAGAGCCCCAAAGCCCCTGGAAAACACCGAAGCCG  
 CTCAGGCCAGCCAGCGGCAGCAAGTTCAGCCCCGCCATCCCCGTGTCTACCCAGGAAAGCGTCAAGCGTCCCCGCCAGCGT  
 GTCCACCAGCATCTAGCATCTCAACCGGCCACAGCTTCTGCCCTGGTCAAGGGCAACACCAACCCCATCACCAGCATGTC  
 TGCCCTGTGACGGCCTCTGGCCCTCATGGCCTTCTTCTTCACTGCCCGCTTTCCAGTCCGGAAACCTGTCTGCCAGCTGCAT  
 TAACATGGTCATAGCTGTTTCTTGCATATTGGGCGCTCTCCGCTTCTCGCTCACTGACTCGCTGCGCTCGGTGCTTGGGTA  
 AAGCCTGGGGTGCCTAATGAGCAAAAGGCCAGCAAAAGGCCAGGAACCGTAAAAAGGCCGCTTGTGCGGTTTTTCCATAGG  
 CTCCGCCCCCTGACGAGCATCACAAAATCGACGCTCAAGTCAGAGGTGGCGAAAACCCGACAGGACTATAAAGATAACCAGGC  
 GTTCCCCCTGGAAGCTCCCTCGTGCCTCTCCTGTTCCGACCCTGCCGCTTACCCGATACCTGTCCGCCTTCTCCCTTCGGG  
 AAGCGTGGCGCTTTCTCATAGCTCAGCTCAGCTGATAGGTATCTCAGTTCGGTGTAGGTGTCGCTCCAAGCTGGCTGTGACGA  
 ACCCCCCGTTACGCCGACCCTGCGCCTTATCCGGTAACTATCGTCTTGAGTCCAACCCGGTAAAGACACGACTTATCGCCACT  
 GGCAGCAGCCACTGGTAACAGGATTAGCAGAGCGAGGTATGTAGGCGGTGCTACAGAGTCTTGAAGTGGTGGCCTAACTACG  
 GCTACACTAGAAGAAGTATTTGGTATCTGCGCTCTGCTGAAGCCAGTTACCTTCGAAAAAGAGTTGGTAGCTCTTGATCCGG  
 CAAACAAACCACCGCTGGTAGCGGTGGTTTTTTTTGTTTGAAGCAGCAGATTACGCGCAGAAAAAAGGATCTCAAGAAGATCTT  
 TTGATCTTTTCTACGGGGTCTGACGCTCAGTGGAAACGAAAACCTCAGTTAAGGGATTTTGGTCAAGATTATCAAAAAGGATCTT  
 CACCTAGATCTTTTTAAATTAATAAAGTTTAAATCAATCTAAAGTATATATAGTAAACTTGGTCTGACAGTTATTAGAAAAAT  
 TCATCCAGCAGACGATAAAACGCAATACGCTGGCTATCCGGTGCCGCAATGCCATACAGCACCAGAAAACGATCCGCCATTCCG  
 CCGCCAGTTCTTCCGCAATATACGGGTGGCCAGCGCAATATCCTGATAACGATCCGCCACGCCAGACGGCCGCAATCAATA  
 AAGCCGCTAAAACGGCCATTTTCCACCATAATGTTCCGGCAGGCACGCATCACCATGGGTACCACCAGATCTTCGCCATCCGGC  
 ATGCTCGCTTTCAGACGCGCAACAGCTCTGCCGTGCCAGGCCCTGATGTTCTTCCATCCAGATCATCTGATCCACCAGGCC  
 GCTTCCATACGGGTACGCGCACGTTCAATACGATGTTTCGCTGATGATCAAAACGGACAGGTCCGCCGGTCCAGGGTATGCAGA  
 CGACGCATGGCATCCGCCATAATGCTCACTTTTTCTGCCGGCGCCAGATGGCTAGACAGCAGATCCTGACCCGGCACTTCGCC  
 AGCAGCAGCCAATCACGGCCCGCTTCGGTACCACATCCAGCACCAGCCGCACACGGAACACCCGGTGGTGGCCAGCCAGCTCA  
 GACGCGCCGCTTTCATCCTGCAGCTCGTTCCAGCGCACCGCTCAGATCGGTTTTTCAAAACAGCACCAGGACGCCCTGCGCGCTC  
 AGACGAAACACCCGCCGATCAGAGCAGCCAATGGTCTGCTGCGCCCAATCATAGCCAAACAGACGTTCCACCCACGCTGCCGG  
 GCTACCCGATGCAGGCCATCTGTTCAATCACTCTTCTTTTCAATATTATTGAAGCATTATCAGGGTATTGTCTCATGAG  
 CGGATACATATTTGAATGTATTTAGAAAAATAAACAAAATAGGGTTCCAGCGCACATTTCCCCGAAAAGTGCCAC

2.2.2 Vector 55: 4x(Tyr tRNA<sub>CUA</sub>) TyrRS\* mCherry-P2A-TAG-sGFP(1-10)

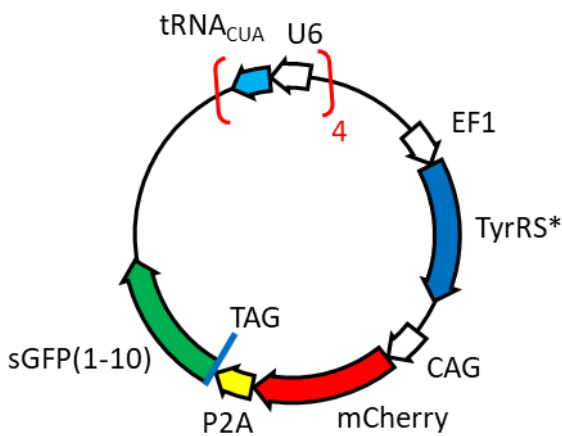

ACTCTTCTTTTTCAATATTATTGAAGCATTATCAGGGTTATTGTCTCATGAGCGGATACATATTTGAATGTATTAGAAAAATAA  
 CAAATAGGGGTTCCGCGCACATTTCCCCGAAAAGTGCCACCTAAATTGTAAGCGTTAATATTTTTGTTAAAATTCGCGTTAAATTTTT  
 GTTAAATCAGCTCATTTTTTAACCAATAGGCCGAAATCGGCAAAATCCCTTATAAATCAAAGAATAGACCGAGATAGGGTTGAGT  
 GTTGTCCAGTTTGGAAACAAGAGTCCACTATTAAAGAACGTGGACTCCAACGTCAAAGGGCGAAAAACCGTCTATCAGGGCGAT  
 GGCCACTACGTGAACCATACCCTAATCAAGTTTTTTGGGGTTCGAGGTGCCGTAAGCACTAAATCGGAACCCCTAAAGGGAGC  
 CCCCATTAGAGCTTGACGGGGAAAGCCGGCGAACGTGGCGAGAAAGGAAGGAAGAAAGCGAAAGGAGCGGGCGCTAGGG  
 CGCTGGCAAGTGTAGCGGTACGCTGCGCGTAACCACCACACCCGCCGCGCTTAATGCGCCGCTACAGGGCGCGTCCCATTCC

GCCATTCAGGCTGCGCAACTGTTGGGAAGGGCGATCGGTGCGGGCCTCTTCGCTATTACGCCAGCTGGCGAAAGGGGGATGT  
GCTGCAAGGCGATTAAGTTGGGTAACGCCAGGGTTTTCCAGTCACGACGTTGTAACACGACGGCCAGTGAGCGCGCCTCGTT  
CATTACGTTTTTTGAACCCGTGGAGGACGGGCAGACTCGCGGTGCAAATGTGTTTTACAGCGTGATGGAGCAGATGAAGATGCT  
CGACACGCTGCAGAACACGCAGCTAGATTAACCCTAGAAAGATAATCATATTGTGACGTACGTTAAAGATAATCATGCGTAAAT  
GACGCATGTGTTTTATCGTCTGTATATCGAGGTTATTTAATTTGAATAGATTAAGTTTTATTATTTACACTTACATACTA  
ATAATAAATTCAACAAACAATTTATTTATGTTTATTTATTTATTAATAAAAAACAAAACTCAAAATTTCTTCTATAAAGTAAACAACTT  
TTATGAGGGACAGCCCCCCCCAAAGCCCCAGGGATGTAATTACGTCCTCCCCCGCTAGGGGGCAGCAGCGAGCCGCCCG  
GGGCTCCGCTCCGGTCCGGCGCTCCCCCGCATCCCCGAGCCGGCAGCGTGCGGGGACAGCCCCGGGCACGGGAAGGTGG  
CACGGGATCGTTTTCTCTGAACGCTTCTCGCTGCTCTTTGAGCCTGCAGACACCTGGGGGGATACGGGAAAAGGCCCTTTAA  
GAAAAACCGCACTTGTCTGGTGGGGGAAGGATTGGAACCTTGAAGTCTGTGACGGCAGATTAGAGTCTGCTCCCTTTGGCC  
GCTCGGGAACCCACC

GGTGTTCGTCCTTTCCACAAGATATATAAAGCCAAGAAATCGAAATACTTTCAAGTTACGGTAAGCAT  
ATGATAGTCCATTTAAACATAATTTAAAACCTCAAACACCAAGAAATTTACTTTCTACGTCACGTATTTGTACTAATATC  
TTTGTGTTTACAGTCAAATTAATCTAATCTCTAACAGCCTTGATCGTATATGCAAATATGAAGGAATCATGGGAATAGG  
CCCTCTTCTGCCAATCGACGAACCTGTGGCCGTTACCCTCTTAAGAAAAACCGCACTTGTCTGGTGGGGGAAGGATTGAA  
CCTTGAAGTCTGTGACGGCAGATTAGAGTCTGCTCCCTTTGGCCGCTCGGGAACCCACC

GGTGTTCGTCCTTTCCACA  
GATATATAAAGCCAAGAAATCGAAATACTTTCAAGTTACGGTAAGCATATGATAGTCCATTTAAACATAATTTAAAACCTGCAA  
CTACCCAAGAAATTTACTTTCTACGTCACGTATTTGTACTAATATCTTTGTGTTTACAGTCAAATTAATTTAATTTATCTCTA  
CAGCCTTGATCGTATATGCAAATATGAAGGAATCATGGGAATAGGCCCTTCCCTGCCAACCAGGTTGCGATCGCTCCGGT  
TCTTAAGAAAAACCGCACTTGTCTGGTGGGGGAAGGATTGGAACCTTGAAGTCTGTGACGGCAGATTAGAGTCTGCTCCCT  
TGGCCGCTCGGGAACCCACC

GGTGTTCGTCCTTTCCACAAGATATATAAAGCCAAGAAATCGAAATACTTTCAAGTTACGGTA  
AGCATATGATAGTCCATTTAAACATAATTTAAAACCTGCAAACCTCAAAGAAATTTACTTTCTACGTCACGTATTTGTACTA  
ATATCTTTGTGTTTACAGTCAAATTAATTTAATTTATCTCTAACAGCCTTGATCGTATATGCAAATATGAAGGAATCAGGGAA  
ATAGGCCCTTCCCTGCCAACCCTTAAGAAAAACCGCACTTGTCCCTAAAAACCGCACTTGTCTGGTGGGGGAAGGATTGGA  
ACCTTGAAGTCTGTGACGGCAGATTAGAGTCTGCTCCCTTTGGCCGCTCGGGAACCCACC

GGTGTTCGTCCTTTCCACA  
AGATATATAAAGCCAAGAAATCGAAATACTTTCAAGTTACGGTAAGCATATGATAGTCCATTTAAACATAATTTAAAACCTGCAA  
ACTACCCAAGAAATTTACTTTCTACGTCACGTATTTGTACTAATATCTTTGTGTTTACAGTCAAATTAATTTAATTTATCTCTA  
ACAGCCTTGATCGTATATGCAAATATGAAGGAATCATGGGAATAGGCCCTTCCCTGCCAACCAGGTTGCGATCGCTCCGGT  
GCCGTCAGTGGGCAGAGCGCACATCGCCACAGTCCCCGAGAAGTTGGGGGGAGGGGTGGCAATTGAACGGGTGCCTAGA  
GAAGGTGGCGCGGGTAAACTGGGAAAGTGATGTCGTGACTGGCTCCGCCCTTTTCCGAGGGTGGGGGAGAACCGTATATA  
AGTGCAGTAGTCCCGTGAACGTTCTTTTCGCAACGGGTTTGCCGCCAGAACACAGCTGAAGCTTCGAGGGGCTCGCATCTCT  
CCTTACGCGCCCGCCGCTACCTGAGGCCGCCATCCACGCCGTTGAGTCGCGTTCGCCGCTCCCGCCTGTGGTGCCT  
CCTGAAGTGCCTCCGCGTCTAGGTAAGTTAAAGCTCAGGTCGAGACCGGGCCTTTGTCCGGCGCTCCCTTGGAGCCTACCTA  
GACTCAGCCGGCTCCTCCAGCTTTGCCTGACCCCTGCTTGTCAACTCTACGCTTTTGTGTTTCTGTTCTGCGCCGTTACAG  
ATCCAAGCTGTACCCGCGCTACTCTACAGATAGCGTTAAACTTACGCTTCCACCATGGTAGCCACTACAAGGACGAGC  
ACGACAAGGCAAGCAGTAACCTTGATTAAACAATTGCAAGACGGGGGCTGGTAGCCAGGTGACGGACTAGAAGGACGAG  
CAGAGCGACTGGCGCAAGGCCGATCGCACTCGTGTGGCTTCGATCCTACCGCTGACAGCTTGCATTTGGGGCATCTTGT  
CCATTGTTATGCCTGAAACGCTTCCAGCAGGCGGGCCACAAGCCGTTGCGCTGGTAGGCGGCGGACGGGTCTGATTGGC  
GACCCGAGCTTCAAAGCTGCCGAGCGTAAGCTGAACACCGAAGAACTGTTCAAGAGTGGGTGGACAAAATCCGTAAGCAG  
GTTGCCCGTCTCTCGATTTCAGTGTGGAGAAAACCTGCTATCGCGGCAATATGACTGGTTCGGCAATGTAATG  
GCTGACCTTCTGCGCATATGGCAAACACTTCCGTTAACCAGATGATCAACAAGAAGCGGTTAAGCAGCGTCTCAACC  
GTGAAGATCAGGGGATTTGTTCACTGAGTTTTCTACAACCTGCTGCAGGGTTATAGTATGGCCTGTTGAACAAACAGTAC  
GGTGTGGTGTGCAAATTTGGTGGTCTGACCAGTGGGGTAACATCACTTCTGGTATCGACCTGACCCGTCGTCTGCATCAGAA  
TCAGGTGTTTGGCCTGACCGTCCGCTGATCACTAAAGCAGATGGCACCATAATTTGGTAAAACCTGAAGGCGGCGCAGTCTGG  
TTGGATCCGAAGAAAACAGCCCGTACAAATCTACCACTTGTGATCAACACTGCGCGTGGCAGTGGCAGTGGTACCGCTTCTGAA  
GTTCTTACCTTATGACATTGAAGAGATCAACGCCCTGGAAGAAGAATAAAAAACAGCGGTAAAGCACCAGCGCCGCGCAG  
TATGACTGGCGGAGCAGGTGACTCGTCTGTTTACGGTGAAGAAGGTTTACAGGCGGCAAAACGTTATTACCGAATGCTGT  
TCAGCGGTTCTTTGAGTGCCTGAGTGAAGCGGACTTGAACAGCTGGCGCAGGACGGCGTACCGATGGTTGAGATGGAAAA  
GGGCGCAGACCTGATGCAGGCACTGGTCTGATTCTGAACTGCAACCTTCCCGTGGTCAGGCACGTAACCTATCGCCTCAAT  
GCCATCACCATTAACGGTGAATAACTGCTCGGATCTGTAATGCTTTTAAAGAAGAAGATCGTCTGTTTGGTGCCTTTACCTA  
CTGCTGCGCGGTAAGAAATACTGTCTGATTGCTGAAAGGCGCCGTTAAATGATAAGGATCCACTAGTCCAGTCCAGTGGT  
GAATTGACATTGATTATTGACTAGTTAATAAGTAATCAATACGGGGTCAATTAGTTTCAATAGCCCATATAGGAGTTCGCGTTAC  
ATAACTTACGGTAAATGGCCCGCCTGGCTGACCGCCCAACGACCCCGCCATTGACGTCAATAATGACGTATGTTCCCATAGT  
AACGCCAATAGGGACTTTCCATTGACGTCAATGGGTGGAGTATTTACGGTAAACTGCCCACTTGGCAGTACATCAAGTGTATCAT  
ATGCCAAGTACGCCCCCTATTGACGTCAATGACGGTAAATGGCCCGCCTGGCATTATGCCAGTACATGACCTTATGGGACTTTC  
CTACTTGGCAGTACATCTACGTATTAGTCACTGCTATTACCATGGTCGAGGTGAGCCCACTGTTCTGCTTCACTCTCCCATCTC  
CCCCCTCCCAACCCCAATTTTGTATTTATTTATTTTAAATTTTTTTGTCAGCGATGGGGCGGGGGGGGGGGGGCGCG  
CGCCAGGCGGGGCGGGGCGGGGCGAGGGGCGGGGCGGGGCGAGGCGGAGAGGTGCGGCGGACGCCAATCAGAGCGGGCG  
GCTCCGAAAGTTTCTTTTATGGCGAGGCGGGCGGGCGGGCCCTATAAAAAAGCAAGCGCGCGGGCGGGGAGTCTGCT  
GCGTTGCCCTTCCGCGCTGCCCCGCTCCGCGCCGCTCGCGCCGCGCCGCGCCGCTGACTGACCCGCTTACTCCACAGG  
TGAGCGGGGCGGGACGGCCCTTCTCCCGGGCTGTAATTAGCGCTTGGTTAATGACGGCTCGTTCTTTTGTGGCTGCGTG  
AAAGCCTTAAAGGGTCCGGGAGGGCCCTTTGTGCGGGGGGAGCGGCTCGGGGGGTGCGTGTGTGTGTGTGCGTGGG  
AGCGCCGCTGCGGCCCGCGCTGCCCGCGGCTGTGAGCGCTGCGGGCGGGCGGGGCTTTGTGCGCTCCGCGTGTGC  
GCGAGGGGAGCGCGGGCGGGGCGGTGCCCGCGGTGCGGGGGGCTGCGAGGGGAACAAAGGCTGCGTGCAGGGGTGTGT  
GCGTGGGGGGGTGAGCAGGGGGTGTGGCGCGGGCGGTGCGGCTGTAACCCCCCTGCACCCCTCCCGAGTTGCTGAG  
CACGCCCCGCTTCCGGTGCAGGGCTCCGATCGGGGCTGCGCGGGGCTCGCCGTGCCGGCGGGGGGTGCGCGCAGGT  
GGGGTCCGCGGGCGGGGCGGGCCCTCGGGCGGGGAGGGGAGGGGCGCGGGCCCGGAGCGCGG  
CGGCTGTGAGCGCGCGGAGCCGAGCCGACTTGCCTTTTATGTTAATCGTGCAGAGGGGCGAGGAACTTCTTTGTCCAAA  
TCTGTGCGGAGCCGAAATCTGGGAGGCGCCCGCCACCCCTTAGCGGGCGCGGGGCGAAGCGGTGCGGCGCCGGCAGGA  
AGGAAATGGGCGGGGAGGGCCTTCTGCGTGCCTGCGCGCCGCTCCCTTCTCCCTTCCAGCCTCGGGGCTGTCCGCGGG  
GGGACGGCTGCCCTTCCGGGGGACGGGGCAGGGCGGGGTTCCGCTTCTGGCGTGTGACCGCGGCTTAGAGCCTCTGCTA  
ACCATGTTTCTGCTTCTTTTCTTACAGCTCCTGGGCAACGTGCTGTTTATGCTGTCTCATATTTGGCAAAGAATTC  
GCCACCATGGTAGGAGGAGGAGGATAAATGGCCATCATCAAGGAGTTCTAGCTTCAAGTTCACATGAGGGC  
TCCGTGAACGGCCACGAGTTCGAGATCGAGGGCGAGGGCGAGGGCGCCCTACGAGGGCACCCAGACCGCAAGCTGAA  
GGTGACCAAGGGTGGCCCTGCCCTTCCGCTGGGACATCTGTCCCTCAGTTCATGTACGGCTCAAGGCTACGTGAAG

CACCCGCGGACATCCCCGACTACTTGAAGCTGTCTTCCCCGAGGGCTTCAAGTGGGAGCGCGTGATGAACTTCGAGGACG  
GCGGCGTGGTGACCGTGACCCAGGACTCTCCCTGCAGGACGGCGAGTTTCATCTACAAGGTGAAGCTGCGCGGCACCAACT  
TCCCCTCCGACGGCCCCGTAATGCAGAAAGACCATGGGCTGGGAGGCCTCCTCCGAGCGGATGTACCCCGAGGACGGCG  
CCCTGAAGGGCGAGATCAAGCAGAGGCTGAAGCTGAAGGACGGCGGCCACTACGACGCTGAGGTCAAGACCACCTACAAG  
GCCAAGAAGCCCGTGACGCTGCCCGGCGCCTACAACGTCAACATCAAGTTGGACATCACCTCCCACAACGAGGACTACACC  
ATCGTGAACAGTACGAACGCGCCGAGGGCCGCACTCCACCGCGGCATGGACGAGCTGTACGCGTCTGGAGGCGCCAC  
CAATTTACGCTGTGAACAGGCTGGCGACGTGGAAGAGAACCCTGGACCTGGACAAAAGTCGTAGTCCAAAGGAGAAGA  
ACTGTTACCCGGTGTGGCCAATTTTGGTTGAACTCGATGGTGATGTCAACGGACATAAGTTCTCAGTGAGAGGCGAAGGAG  
AAGGTGACGCCACCATTGAAAATTGACTCTTAAATTCATCTGTACTACTGGTAAACTTCTGTACCATGGCCGACTCTCGTAA  
CAACGCTTACGTACGGAGTTCAGTGCTTTTCGAGATACCCAGACCATATGAAAAGACATGACTTTTTTAAGTCGGCTATGCCTG  
AAGGTTACGTGCAAGAAAGAACAATTTTCGTTCAAAGATGATGAAAAATATAAAACTAGAGCAGTTGTTAAATTTGAAGGAGAT  
ACTTTGGTTAACCGCATTGAACGAAAGAACAGATTTTAAAGAAGATGGTAATATTCTTGGACACAAAACGAAATACAATTTT  
AATAGTAAACGTATACACTGCTGATAAGCAAAAAGACGGAAATTAAGCGAAATTTACAGACATGCCATAATGTAGAAGA  
TGGCAGTGTTCAACTTGCCGACCATTACCAACAAAACACCCCTATTGGAGACGGTCCGGTACTTCTTCTGATAATCACTACCT  
CTCAACACAAAACAGTCTGAGCAAAGATCCAAATGAAAAATGA GAATTCCTCCTCAGGTGCAGGCTGCCTATCAGAAAGTGG  
TGGCTGGTGTGGCCAATGCCCTGGCTCACAATACTACTGAGATCTTTTTCCCTCTGCCAAAATATGGGGACATCATGAAGCC  
CCTTGAGCATCTGACTTCTGGCTAATAAAGGAAATTTATTTTCATTGCAATAGTGTGTTGGAATTTTTGTGTCTCTCACTCGGAAG  
GACATATGGGAGGGGTCGACAATCAACCTCTGGATTACAAAATTTGTGAAAGATTGACTGGTATTCTTAACATGTTGCTCCTTTT  
ACGCTATGTGGATACGCTGCTTTAATGCCCTTTGTATCATGCGTTAACTAAACTTTGTTTATTGCAGCTTATAATGTTTACAAATAAG  
CAATAGCATCACAATTTTACAATAAAGCAATTTTTTCACTGCATTCTAGTTGTGGTTTTGTCCAACTCATCAATGTATCTTATCAT  
GTCTGGAATTGACTCAAATGATGTCAATTAGTCTATCAGAAGCTATCTGGTCTCCCTTCCGGGGGACAAGACATCCCTGTTTAATA  
TTTAAACAGCAGTGTTCCAAACCTGGGTTCTTATATCCCTTGCTCTGGTCAACCAGGTTGCAGGGTTTCTGTCTCACAGGAAC  
GAAGTCCCTAAGAAACAGTGGCAGCCAGGTTTAGCCCCGAATTGACTGGATTCTTTTTAGGGCCCATTGGTATGGCTTTTT  
CCCCGTATCCCCCAGGTGTCTGCAGGCTCAAAGAGCAGCGAGAAAGCTTTCAGAGGAAAGCGATCCCGTCCACCTTCCCGT  
GCCCGGGCTGTCCCCGCACGCTGCCGGCTCGGGGATGCGGGGGGAGCGCCGACCGGAGCGGAGCCCCGGGCGGCTCGCT  
GCTGCCCCCTAGCGGGGAGGGACGTAATTACATCCCTGGGGGCTTTGGGGGGGGCTGTCCCTGATATCTATAACAAGAAAA  
TATATATAATAAGTTATCACGTAAGTAGAACATGAAATAACAATATAATTATCGTATGAGTTAAATCTTAAAAGTCACGTAAGA  
TAATCATGCGTCATTTTACTCACGCGGTCGTTATAGTTCAAATCAGTGACACTTACCGCATTGACAAGCAGCCCTACGGGAG  
CTCAAAGCGGACTGAGATGTCTAAATGCACAGCAGCGGATTCCGCTATTTAGAAAGAGAGCAATATTTCAAGAATGCAT  
GCGTCAATTTTACGACACTATCTTTCTAGGGTTAATCTAGCTGCATCAGGATCATATCGTCGGGCTTTTTTCCGGCTCAGTCAT  
CGCCCAAGCTGGCGCTATCTGGGCATCGGGGAGGAAGAAGCCCGTGCCTTTTCCCGCAGGTTGAAGCGGCATGGAAAGAGTT  
TGCCGAGGATGACTGCTGCTGCATTGACGTTGAGCGAAAACGCACGTTTACCATGATGATTCGGGAAGGTGTGGCCATGCACGC  
CTTTAACGGTGAACCTGTTTCGTTTACGGCCACCTGGGATACCAAGTTCGTCGCGGCTTTTCCGGACACAGTTCGGATGGTCAGCCC  
GAAGCGCATCAGCAACCCGAACAATACCGGCGACAGCCGAACTGCCGTGCCGTGTGCAGATTAATGACAGCGGTGCGGCG  
CTGGGATATTACGTCAGCGAGGACGGGTATCTTGGCTGGATGCCGCAGAAATGGACATGGATACCCCGTGAGTTACCCGCGG  
GCGCGCTTGGCGTAATCATGGTCATAGCTGTTTCTGTGTGAAATTTGTTATCCGCTCACAATCCACACAACATACGAGCCGGAA  
GCATAAAGTGTAAGCCTGGGGTGCCTAATGAGTGAGCTAACTCACATTAATTGCGTTGCGCTCACTGCCCGCTTTCCAGTCGG  
GAAACCTGTGCTGCCAGCTGCATTAATGAATCGGCCAACGCGCGGGGAGAGGCGGTTTGCATTTGGGCGCTCTTCCGCTTCC  
TCGCTCACTGACTCGCTGCGCTCGGTCGTTCCGCTGCGGCGAGCGGTATCAGCTCACTCAAAGGCGGTAATACGGTTATCCAC  
AGAATCAGGGGATAACGCAGGAAAGAACATGTGAGCAAAAAGCCAGCAAAAAGGCCAGGAACCGTAAAAAGCCCGCTTGGTGG  
CGTTTTTCCATAGGCTCCGCCCCCTGACGAGCATCACAATAATCGACGCTCAAGTCAGAGGTGGCGAAACCCGACAGGACTAT  
AAAGATACCAGGCGTTTCCCCTGGAAGCTCCCTCGTGCCTCTCCTGTCCGACCCTGCCGCTTACCGGATACCTGTCCGCCT  
TTCTCCCTTCGGGAAGCGTGGCGCTTTCTCATAGCTCACGCTGTAGGTATCTCAGTTCGGTGTAGGTGCTTCCGCTCCAAGCTGG  
GCTGTGTGCACGAACCCCGGTTTACGCCGACCGCTGCGCCTTATCCGGTAACTATCGTCTTGTAGTCCAACCCGTAAGACACG  
ACTTATCGCCACTGGCAGCAGCCACTGGTAACAGGATTAGCAGAGCGAGGTATGTAGGCGGTGTACAGAGTTCTTGAAGTGGT  
GGCCTAACTACGGCTACACTAGAAGGACAGTATTTGGTATCTGCGCTCTGCTGAAGCCAGTTACCTTCGGAAAAAGAGTTGGTA  
GCTCTTGATCCGGCAAACAACCCAGGCTGGTAGCGGTGGTTTTTTTTGTTTGAAGCAGCAGATTACGCGCAGAAAAAAGGAT  
CTCAAGAAGATCCTTTGATCTTTTCTACGGGGTCTGACGCTCAGTGAACGAAAACCTCACGTTAAGGGATTTTGGTCAAGAGATT  
ATCAAAAAGGATCTTACCTAGATCCTTTTAAATTAATAAAGTAAATCAATCTAAAGTATATATGAGTAAACTTGGTCTGAC  
AGTTACCAATGCTTAATCAGTGAGGCACCTATCTCAGCGATCTGTCTATTTTCGTTTCCATCCATAGTTGCCTGACTCCCCGCTCGTGA  
GATAACTACGATACGGGAGGGCTTACCATCTGGCCCCAGTGTGCAATGATACCCGCGAGACCCACGCTCACCGGCTCCAGATTT  
ATCAGCAATAAACAGCCAGCCGGAAGGGCCGAGCGCAGAAGTGGTCTGCAACTTTATCCGCTCCATCCAGTCTATTAATTG  
TTGCCGGGAAGCTAGAGTAAGTAGTTCGCCAGTTAATAGTTTGCACAACGTTGTTGCCATTGCTACAGGCATCGTGGTGTACCG  
CTCGTCTTTGGTATGGCTTCAATCAGCTCCGGTCCCAACGATCAAGGCGAGTTACATGATCCCCCATGTTGTGAAAAAAGCG  
GTTAGCTCCTTCGGTCTCCGATCGTTGTGCAAGTAAGTTGGCCGAGTGTATCACTCATGGTTATGGCAGCACTGCATAATT  
CTCTTACTGTCAATGCCATCCGTAAGATGCTTTTTCTGTGACTGGTGAGTACTCAACCAAGTCATTCTGAGAATAGTGTATGCGGCG  
ACCGAGTTGCTCTTGGCCGGCTCAATACGGGATAATACCGCGCCACATAGCAGAACTTTAAAAGTGTCTCATCATTGAAAAACGT  
TCTTCCGGGGCAAAAACCTCAAGGATCTTACCGCTGTGAGATCCAGTTCGATGTAACCCACTCGTGCACCCAACTGATCTTCCAG  
CATTTTTACTTTACCAGCGTTTCTGGGTGAGCAAAAACAGGAAGGCAAAATGCCGCAAAAAGGGAATAAGGGCGACACGGA  
AATGTTGAATACTCAT

2.2.3 Vector 56: 4x(Pyl tRNA<sub>UCCU(Ev2)</sub>) PylRS mCherry-P2A-AGGA-sGFP(11)

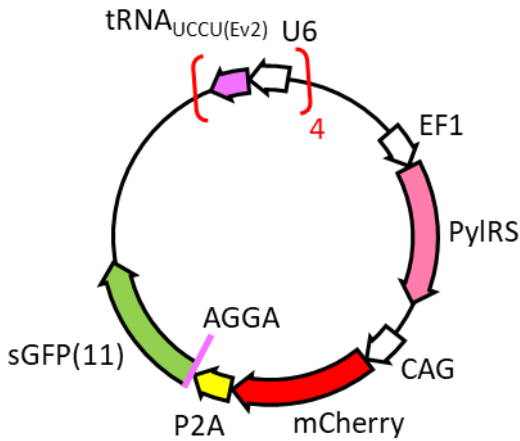

ACTCTTCCTTTTTCAATATTATTGAAGCATTATCAGGGTTATTGTCTCATGAGCGGATACATATTTGAATGTATTTAGAAAAATAA  
CAAATAGGGGTTCCGCGCACATTTCCCGGAAAAGTGCCACCTAAATTGTAAGCGTTAATATTTTGTAAAATTCGCGTTAAATTTTT  
GTTAAATCAGCTCATTTTTTAACCAATAGGCCGAAATCGGCAAAATCCCTTATAAATCAAAGAATAGACCGAGATAGGGTTGAGT  
GTTGTTCCAGTTTGAACAAGATCCACTATTAAGAACGTGGACTCCAACGTCAAAGGGCGAAAAACCGTCTATCAGGGCGAT  
GGCCACTACGTGAACCATCACCTAATCAAGTTTTTTGGGGTCGAGGTGCCGTAAAGCACTAAATCGGAACCCCTAAAGGGAGC  
CCCCGATTTAGAGCTTGACGGGGAAAAGCCGGCGAACGTGGCGAGAAAAGGAAGGAAAGAAAAGCGAAAAGGAGCGGGCGCTAGGG  
CGCTGGCAAGTGTAGCGGTACGCTGCGCGTAACCACCACACCCGCCGCGCTTAATGCGCCGCTACAGGGCGCGTCCCATT  
GCCATTGAGGCTGCGCAACTGTTGGGAAGGGCGATCGGTGCGGGCCTCTTCGCTATTACGCCAGCTGGCGAAAGGGGGATGT  
GCTGCAAGGCGATTAAGTTGGGTAACGCCAGGGTTTTCCAGTCACGACGTTGTA AAAACGACGGCCAGTGAGCGCGCCTCGTT  
CATTACGTTTTTTGAACCCGTGGAGACGGGACGACTCGCGGTGCAAAATGTGTTTTACAGCGTGATGGAGCAGATGAAGATGCT  
CGACACGCTGCAGAACACGAGCTAGATTAACCTAGAAAAGATAATCATATTGTACGTACGTTAAAGATAATCATGCGTAAAATT  
GACGCATGTGTTTTATCGTCTGTATATCGAGGTTTTATTTAATTTGAATAGATATTAAGTTTTATTATTTACACTTACATACTA  
ATAATAAATTCAACAAACAATTTATTTATGTTATTTATTTATTA AAAAAAACA AAAA ACTCAAATTTCTTCTATAAAGTAACAAA  
ACTTTATGAGGGACAGCCCCCCCCAAAGCCCCAGGGATGTAATTACGTCCCTCCCCCGCTAGGGGGCAGCAGCGAGCCGCCCG  
GGGCTCCGCTCCGGTCCGGCGCTCCCCCGCATCCCCGAGCCGGCAGCGTGCGGGGACAGCCCGGGCACGGGGAAGGTGG  
CACGGGATCGCTTTCTCTGACGCTTCTCGTGTCTTTGAGCCTGCAGACACCTGGGGGATACGGGAAAAGGCCTTTAA  
GAAAAACCGCACTTGTCCGGAAACCCCGGGAATCTAACCCGGCTGAAGCGGATAGGAAGCCCTTCGATCTACATGATCAGG  
TTTCCGGTGTTCGTCTTTCCACAAGATATATAAAGCCAAGAAATCGAAATACTTTCAAGTTACGGTAAGCATATGATAGTCCATT  
TTAAACATAATTTTAAACTGCAAACTACCAAGAAATTATTACTTTCTACGTCACGATTTTTGTACTAATATCTTTGTGTTTACAG  
TCAAATTAATCTAATTTATCTCTAACAGCCTTGATATGCAATATGAAGGAATCATGGGAAATAGGCCCTTCTCCTGCC  
CAATCGACGAACCTTGCGCGTTTACCCTCTTAAGAAAAACCGCACTTGTCCGGAAACCCCGGGAATCTAACCCGGTGAAGC  
GGATAGGAAGCCCTTCGATCTACATGATCAGGTTTCCGGTGTTCGTCTTTCCACAAGATATATAAAGCCAAGAAATCGAAAT  
ACTTTCAAGTTACGGTAAGCATATGATAGTCCATTTTAAACATAATTTTAAACTGCAAACTACCAAGAAATTATTACTTTCTACG  
TCACGATTTTTGTACTAATATCTTTGTGTTTACAGTCAAATTAATTCTAATTATCTCTAACAGCCTTGATCGTATATGCAAAT  
GAAGGAATCATGGGAAATAGGCCCTTCTCCTGCCAATTCGGCAAGTTCTCCACCAGCCTCTTAAGAAAAACCGCACTTGTCCG  
GAAACCCCGGGAATCTAACCCGGCTGAAGCGGATAGGAAGCCCTTCGATCTACATGATCAGGTTTCCGGTGTTCGTCTCTT  
CCACAAGATATAAAGCCAAGAAATCGAAATACTTTCAAGTTACGGTAAGCATATGATAGTCCATTTTAAACATAATTTTAAAC  
TGCAAACTACCAAGAAATTTACTTTCTACGTCACGATTTTTGTACTAATATCTTTGTGTTTACAGTCAAATTAATTCTAATTATC  
TCTCTAACAGCCTTGATCGTATATGCAAATATGAAGGAATCATGGGAAATAGGCCCTTCTCCTGCCAACCTCTTAAGAAAAAC  
GCACTTGTCCCTAAAACCGCACTTGTCCGGAAACCCCGGGAATCTAACCCGGCTGAAGCGGATAGGAAGCCCTTCGATCTA  
CATGATCAGGTTTCCGGTGTTCGTCTTTCCACAAGATATAAAGCCAAGAAATCGAAATACTTTCAAGTTACGGTAAGCATAT  
GATAGTCCATTTTAAACATAATTTTAAACTGCAAACTACCAAGAAATTATTACTTTCTACGTCACGATTTTTGTACTAATATCT  
TGTGTTTACAGTCAAATTAATTCTAATTATCTCTAACAGCCTTGATCGTATATGCAAATATGAAGGAATCATGGGAAATAGGCC  
CTCTTCTGCCAACCGGTTGCGATCGCTCCGGTGCCGTCAGTGGGCAGAGCGCACATCGCCACAGTCCCGGAGAAGTTGG  
GGGGAGGGTTCGGCAATTGAACGGGTGCCTAGAGAAGGTGGCGCGGGTAAACTGGGAAAGTGATGTCGTGACTGGCTCCG  
CCTTTTTCCCGAGGGTGGGGGAGAACCGTATATAAGTGCAGTAGTCGCCGTGAACGTTCTTTTTCGCAACGGGTTTTGCCGCCAG  
AACACAGCTGAAGCTTCGAGGGGCTCGCATCTCTCTTACGCGCCCGCCGCTACCTGAGGCCGCCATCCACGCCGTTGA  
GTCGCTTTCGCCCTCCCGCCTGTGGTGCCTCCTGAACTGCGTCCGCCGCTAGGTAAGTTTAAAGCTCAGGTCGAGACCG  
GGCCTTTGTCCGGCGCTCCCTTGGAGCCTACCTAGACTCAGCCGGCTCTCCACGCTTTGCCTGACCCTGCTTGTCTCAACTCTAC  
GTCTTTGTTTCTGTTTCTGTTCTGCGCCGTTACAGATCCAAGCTGTGACCGGCGCCTACTCTACAGATAGCGTTTAAACTTACGCT  
TGCCACCATGGCTAGCGACTACAAGGACGACGACGACAAGGACAAGAAGCCCTGAACACCCTGATCAGCGCCACAGGACT  
GTGGATGTCCAGAACCAGCCATCCACAAGATCAAGCACCACGAGGTGTCCCGTCCAAAATCTACATCGAGATGGCCTGC  
GGCATCACCTGGTTCGCAACAACAGCAGAGCAGCCGACGAGGACCCCTGCGGCACCACAAGTACAGAAAGACCTGC  
AAGCGGTGCAGAGTGTCCGACGAGGACCTGAACAAGTTCTGACCAAGGCCAACGAGGACACGAGCCGTTGAAAGTGAAG  
GTGGTGTCCGCCCCACCCGGACCAAGAAAGCCATGCCAAGAGCGTGGCCAGAGCCCCAACGCCCTGGAAAACACCGAA  
GCCGCTCAGGCCAGCCAGCGGCAGCAAGTTAGCCCCGCCATCCCCGTGTCTACCAGGAAAGCGTCAGCGTCCCCGCC  
AGCGTGTCCACCAGCATCTAGCATCTCAACCCGGCCACAGCTTCTGCCCTGGTCAAGGGCAACACCAACCCCATCACA  
GCTGTCTGCCCTGTGCAAGCTCTGCCAGCCCTGACCAAGTCCAGACCGACCGGCTGGAAGTCTCTCTGACCCCAA  
GGACGAGATCAGCCTGAACACGCGGAAGCCCTTCCGGAGCTGGAAGAGCAGCTGCTGAGCCGCGGAAGAAGGACCTCC  
AGCAAATCTACGCCGAGGAACGGGAGA ACTACCTGGGCAAGCTGGAAGAGAGATACCCGGTCTTCTGTTGACCGGGCT  
TCCTGGAATCAAGAGCCCATCCTGATCCCCCTGGAGTACATCGAGCGGATGGGCATCGACAACGACCCGAGCTGAGCA  
AGCAGATTTCCGGGTGGACAAGA ACTTCTGCCTGCGGCCATGCTGGCCCCAACCTGTACA ACTACCTGCGGAAACTGGA  
TCGCGCTCTGCCGACCCCATCAAGATTTTCGAGATCGGCCCTGCTACCGGAAAGAGAGCGACGGCAAAGAGCACCTGGA  
AGAGTTTACAATGCTGAACTTTTGCAGATGGGCAGCGGCTGCACCAGAGAGA ACTGGAATCCATCATCACCAGACTTTCTGA



TAAAGTATATATGAGTAACTTGGTCTGACAGTTACCAATGCTTAATCAGTGAGGCACCTATCTCAGCGATCTGTCTATTTTCGTTT  
 ATCCATAGTTGCCTGACTCCCCGCTCGTGTAGATAACTACGATACGGGAGGGCTTACCATCTGGCCCCAGTGCTGCAATGATACC  
 GCGAGACCCACGCTCACCGGCTCCAGATTTATCAGCAATAAACCCAGCCAGCCGGAAGGGCCGAGCGCAGAAGTGGTCCTGCAA  
 CTTTATCCGCTCCATCCAGTCTATTAATTGTTGCCGGAAGCTAGAGTAAGTAGTTCGCCAGTTAATAGTTTGGCAACGTTGTT  
 GCCATTGCTACAGGCATCGTGGTGTACAGCTCGTCTTTGGTATGGCTTATTTCAGCTCCGTTCCCAACGATCAAGGCGAGTT  
 ACATGATCCCCCATGTTGTGCAAAAAAGCGGTTAGCTCCTTCGGTCTCCGATCGTTGTGAGAAGTAAGTTGGCCGAGTGTAT  
 CACTCATGGTTATGGCAGCACTGCATAATTCTTACTGTATGCCATCCGTAAGATGCTTTTCTGTGACTGGTGAAGTACTCAACC  
 AAGTCATTCTGAGAAATAGTGTATGCGGCGACCCAGTTGCTCTTGCCTGGCGTCAATACGGGATAATACCGCGCCACATAGCAGA  
 ACTTTAAAAGTGCTCATCATTGGAAAACGTTCTTCGGGGCGAAAACCTCAAGGATCTTACCGCTGTTGAGATCCAGTTTCGATGT  
 AACCCACTCGTGCACCCAAGTATCTTACGATCTTTACTTTCACCAGCGTTTCTGGGTGAGCAAAAAACAGGAAGGCAAAATGC  
 CGCAAAAAAGGGAATAAGGGCGACACGGAAATGTTGAATACTCAT

**2.2.4 Vector 57: 4x(Tyr tRNA<sub>CUA</sub>) TyrRS\* sGFP(1-10)-TAG-sGFP(11)**

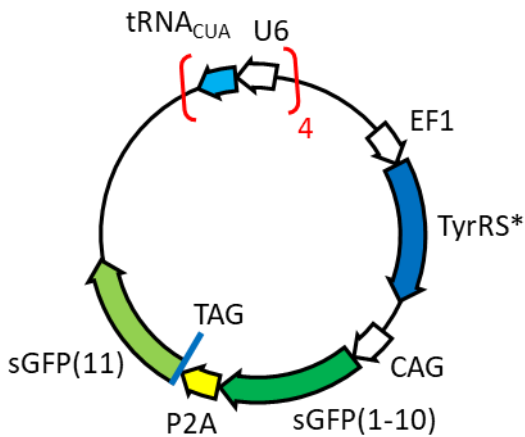

ACTCTTCCTTTTTCAATATTATTGAAGCATTATCAGGGTTATTGTCTCATGAGCGGATACATATTTGAATGTATTTAGAAAAATAAA  
 CAAATAGGGGTTCCGCGCACATTTCCCGGAAAAGTGCCACCTAAATGTAAGCGTTAATATTTTGTAAAATTCGCGTTAAATTTTT  
 GTTAAATCAGCTCATTTTTTAAACCAATAGGCCGAAATCGGCAAAATCCCTTATAAATCAAAGAATAGACCGAGATAGGGTTGAGT  
 GTTGTCCAGTTTGAACAAGAGTCCACTATTAAGAAGCTGGACTCCAACGTCAAAGGGCGAAAACCGTCTATCAGGGCGAT  
 GGCCCACTACGTGAACCATCACCTAATCAAGTTTTTTGGGGTCGAGGTGCCGTAAAGCACTAAATCGGAACCCATAAGGGGAGC  
 CCCCCATTTAGAGCTTGACGGGGAAAGCCGGCGAACGTGGCGAGAAAGGAAGGGAAGAAAGCGAAAGGAGCGGGCGCTAGGG  
 CGCTGGCAAGTGTAGCGGTACAGCTGCGCGTAACCACCACACCCGCCGCTTAATGCGCCGCTACAGGGCGCGTCCCATTC  
 GCCATTCAGGCTGCGCAACTGTTGGGAAGGGCGATCGTGTGCGGGCCTCTTCGCTATTACGCCAGCTGGCGAAAGGGGGATGT  
 GCTGCAAGGGCATTAAGTTGGGTAACGCCAGGGTTTTCCAGTCAAGCGTTGTAAAACGACGGCCAGTGAGCGCGCCTCGTT  
 CATTACGTTTTTGAACCCGTGGAGGACGGGACAGCTCGCGGTGCAAAATGTGTTTTACAGCGTGATGGAGCAGATGAAGATGCT  
 CGACACGCTGCAGAACCGCAGCTAGATTAACCTAGAAAGATAATCATTGTGACGTACGTTAAAGATAATCATGCGTAAAATT  
 GACGCATGTGTTTTATCGTCTGTATATCGAGGTTATTTAATTTGAATAGATATTAAGTTTTATTATTTACACTTACATACTA  
 ATAATAAATTCAACAAACAATTTATTTATGTTTTATTTATTTAAAAAAAACAAAACTCAAAATTTCTTCTATAAAGTAAACAACTT  
 TTATGAGGGACAGCCCCCCCCAAAGCCCCAGGGATGTAATTACGTCCCTCCCCCGCTAGGGGGCAGCAGCGAGCCGCCCG  
 GGGCTCCGCTCCGGTCCGGCGCTCCCCCGCATCCCCGAGCCGGCAGCGTGCGGGACAGCCGGGCACGGGGAAGGTGG  
 CACGGGATCGTTTTCTCTGAACGCTTCTCGCTGCTTTTTGAGCCTGCAGACACCTGGGGGATACGGGGAAAAGGCCTTTAA  
 GAAAAACCGCACTTGTCTGGTGGGGGAAGGATTTCGAACCTTCGAAGTCTGTGACGGCAGATTAGAGTCTGCTCCCTTTGGCC  
 GCTCGGGAACCCACC





ATTAATGAATCGGCCAACGCGCGGGGAGAGGCGGTTTTGCGTATTGGGCGCTCTTCCGCTTCTCGCTCACTGACTCGTGCGC  
 TCGGTGCTTCGGCTGCGGCGAGCGGTATCAGCTCACTCAAAGGCGGTAATACGGTTATCCACAGAATCAGGGGATAACGCAGG  
 AAAGAACATGTGAGCAAAAAGGCCAGCAAAAAGGCCAGGAACCGTAAAAAGGCCGCGTTGCTGGCGTTTTTCCATAGGCTCCGCC  
 CCCCTGACGAGCATCAAAAAATCGACGCTCAAGTCAGAGGTGGCGAAAACCCGACAGGACTATAAAGATACCAGGCGTTTTCCCC  
 CTGGAAGCTCCCTCGTGCGCTCTCCTGTTCCGACCCTGCCGTTACCGGATACCTGTCCGCTTTCTCCCTTCGGAAGCGTGG  
 CGTTTTCTCATAGCTCACGCTGTAGGTATCTCAGTTCCGGTGTAGGTGCTTCGCTCCAAGCTGGGCTGTGTGCACGAACCCCCCG  
 TTCAGCCCCGACCCTGCGCCTTATCCGGTAACATCGTCTTGTAGTCCAACCCCGTAAAGACACGACTTATCGCCACTGGCAGCAG  
 CCACTGGTAACAGGATTAGCAGAGCGAGGTATGTAGGCGGTGCTACAGAGTTCTTGAAGTGGTGGCCTAACTACGGCTACACTA  
 GAAGGACAGTATTTGGTATCTGCGCTCTGCTGAAGCCAGTTACCTTCGGAAGAGTGGTAGCTCTTGATCCGGCAAAACAAAC  
 CACCGCTGGTAGCGGTGGTTTTTTTTGTTTGAAGCAGCAGATTACGCGCAGAAAAAAGGATCTCAAGAAGATCCTTTGATCTTT  
 TCTACGGGGTCTGACGCTCAGTGAACGAAAACCTCACGTTAAGGGATTTTTGGTATGAGATTATCAAAAAGGATCTTCACCTAGA  
 TCCTTTTAAATTAATAAATGAAGTTTTAAATCAATCTAAAATATATAGTAACTTGGTCTGACAGTTACCAATGCTTAATCAGTGA  
 GGCACCTATCTCAGCGATCTGTCTATTTTCGTTTCATCCATAGTTGCCTGACTCCCCGTCGTGTAGATAACTACGATACGGGAGGGC  
 TTACCATCTGGCCCCAGTGTGCAATGATACCGCGAGACCCACGCTCACCGGCTCCAGATTTATCAGCAATAAACAGCCAGCC  
 GGAAGGGCCGAGCGCAGAAGTGGTCTGCAACTTTATCCGCTCCATCCAGTCTATTAATTGTTGCCGGAAGCTAGAGTAAGT  
 AGTTCGCCAGTTAATAGTTTGCACAACGTTGTTGCCATTGCTACAGGCATCGTGGTGTACAGCTCGTCTGTTGGTATGGCTTCAT  
 TCAGTCCGGTCCCAACGATCAAGGCGAGTTACATGATCCCCATGTTGTGCAAAAAAGCGGTTAGCTCCTTCGGTCTCCGA  
 TCGTTGTGAGAAGTAAGTTGGCCGAGTGTATCACTCATGGTTATGGCAGCACTGCATAATTCTTACTGTCATGCCATCCGTA  
 AGATGCTTTTTCTGTGACTGGTGAGTACTCAACCAAGTCATTCTGAGAATAGTGTATGCGGCGACCGAGTTGGCTTTGCCCGGCGT  
 CAATACGGGATAATACCGCGCCACATAGCAGAAGTTAAAAGTGTCTCATATTGAAAACGTTCTTCGGGGCGAAAACCTCTCAAG  
 GATCTTACCGCTGTTGAGATCCAGTTTCGATGTAACCCACTCGTGCACCCAAGTATCTTCAGCATCTTTTACTTTACCCAGCGTTT  
 CTGGGTGAGCAAAAACAGGAAGGCAAAAATGCCGCAAAAAGGGGAATAAGGGCGACACGGAAATGTTGAATACTCAT

**2.2.5 Vector 58: Pyl tRNA<sub>CUA(U25C)</sub> PylRS mCherry-P2A-eGFP(150TAG)**

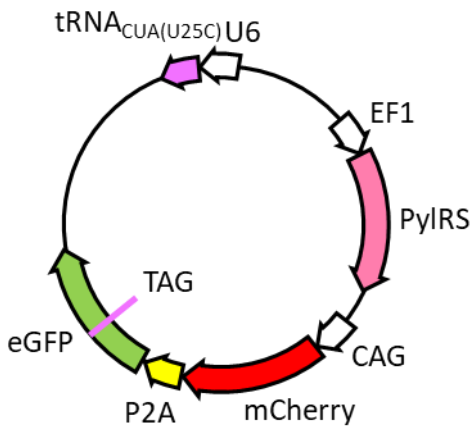

ACTCTTCCTTTTTCAATATTATTGAAGCATTATCAGGGTTATTGTCTCATGAGCGGATACATATTTGAATGTATTAGAAAAATAAA  
 CAAATAGGGGTTCCGCGCACATTTCCCGGAAAAGTGCCACCTAAATTGTAAGCGTTAATATTTTTGTTAAAATTCGCGTTAAATTTTT  
 GTTAAATCAGCTCATTTTTTAACCAATAGGCCGAAATCGGCAAAATCCCTTATAAATCAAAGAATAGACCGAGATAGGGTTGAGT  
 GTTGTCCAGTTTGGAAACAAGAGTCCACTATTAAGAACGTGGACTCCAACGTCAAAGGGCGAAAAACCGTCTATCAGGGCGAT  
 GGCCACTACGTGAACCATACCCTAATCAAGTTTTTTGGGGTCGAGGTGCCGTAAGCACTAAATCGGAACCCCTAAAGGGAGC  
 CCCCATTAGAGCTTGACGGGGAAAGCCGGCGAACGTGGCGAGAAAGGAAGGGAAGAAAGCGAAAGGAGCGGGCGCTAGGG  
 CGCTGGCAAGTGTAGCGGTACAGCTGCGCGTAACCACCACACCCGCGCGCTTAATGCGCCGCTACAGGGCGCGTCCCATTC  
 GCCATTCAGGCTGCGCAACTGTTGGGAAGGGCGATCGGTGCGGGCCTCTTCGCTATTACGCCAGCTGGCGAAAGGGGGATGT  
 GCTGCAAGCGGATTAAGTTGGTAAACGCCAGGGTTTTCCAGTACAGCTGTGAAAACGACGGCCAGTGAGCGCGCTCGTT  
 CATTACGTTTTTTGAACCCGTGGAGGACGGGCAGACTCGCGGTGCAAATGTGTTTTACAGCGTGTATGGAGCAGATGAAGATGCT  
 CGACACGCTGCAGAACACGCAGCTAGATTAACCCTAGAAAGATAATCATATTGTGACGTACGTTAAAGATAATCATGCGTAAAT  
 GACGCATGTGTTTTATCGTCTGTATATCGAGGTTATTTAATTTGAATAGATATTAAGTTTTATTATTTACACTTACATACTA  
 ATAATAAATTCAACAAACAATTTATTTATGTTTATTTATTTAATAAAAAACAAAACCTCAAAATTTCTTCTATAAAGTAAACAACTT  
 TTATGAGGGACAGCCCCCCCCAAAGCCCCAGGGATGTAATTACGTCCTCCCCGCTAGGGGGCAGCAGCGAGCCGCCCCG  
 GGGTCCGCTCCGGTCCGGCGCTCCCCCGCATCCCCGAGCCGGCAGCGTGCGGGGACAGCCCGGGCACGGGGAAGGTGG  
 CACGGGATCGCTTCTCTGAACGCTTCTCGCTGCTCTTTGAGCCTGCAGACACCTGGGGGGATACGGGGAAAAGGCCATAAAA  
 CCGCACTTGTC**CGGAAACCCCGGAATCTAACCCGGCTGAACGGATTAGAGTCCGTTTCGATCTACATGATCAGGTTCCGGT**  
 GTTTCGTCCTTTCCACAAGATATAAAGCCAAGAAATCGAAATCTTTCAAGTTACGGTAAGCATATGATAGTCCATTTTAAACA  
 TAATTTAAAACGCAACTACCAAGAATTTACTTTCTACGTCACGTATTTTGTACTAATATCTTTGTGTTTACAGTCAAATTA  
 ATTCTAATTAATCTCTTAACAGCCTTGATCGTATATGCAAAATGAAAGGAATCATGGGAAATAGGCCCTTCTCCGCAACCCGG  
 TTGCGATCGCTCCGGTGCCTGTCAGTGGCAGAGCGCACATCGCCACAGTCCCGGAGAAGTTGGGGGGAGGGGTGGCAAT  
 TGAACGGGTGCTAGAGAAGGTGGCGCGGGTAAACTGGGAAAGTGTGCTGTACTGGCTCCGCTTTTTCCGAGGGTGG  
 GGGAGAACCGTATATAAGTGCAGTAGTCGCCGTGAACGTTCTTTTTGCAACGGGTTTGCCGCCAGAACACAGCTGAAGCTTCG  
 AGGGGCTCGCATCTCTCTTACGCGCCCGCCGCTACTGAGGCCGCTCCACGCGCGTTGAGTGCCTGTTCCGCGCTC  
 CCGCTGTGGTGCCTCCTGAAGTGCCTCCGCGCTAGGTAAAGTTTAAAGCTCAGGTCGAGACCCGGCCTTTGTCCGCGCTC  
 CTTGGAGCCTACCTAGACTCAGCCGGCTCTCCACGCTTTGCCTGACCCTGCTTGCTCAACTTACGCTTTTGTGTTTCTG  
 TTCTGCGCGTTACAGATCCAAGCTGTGACCGCGCCTACTCTACAGATAGCGTTTAAACTTACGCTTGCACCATGGCTAGCG  
 ACTACAAGGACGACGACGACAAGGACAAGAAGCCCTGAACACCCTGATCAGCGCCACAGGACTGTGGATGTCCAGAACC  
 GCACCATCCAAAGATCAAGCACACGAGGTGTCCCGTCCAAAATCTACATCGAGATGGCTGCGCGCATCACCTGGTGTG  
 CAACAACAGCAGAAGCAGCCGACAGCCGCTGCGCCACCAAGTACAGAAAGCAAGCTGCAAGCGGTGCAGAGTGT  
 CCGACGAGGACTGAACAAGTTCTGACCAAGGCCAACGAGGACCAGCCGCTGAAAGTGAAGTGGTGGTCCGCCCCCA  
 CCGGACCAAGAAAAGCCATGCCAAGAGCGTGGCCAGAGCCCCAACGCCCTGGAAAACACCGAAGCCGCTCAGGCCAG



CTCACATTAATTGCGTTGCGCTCACTGCCGCTTTCCAGTCGGGAAACCTGTCGTGCCAGCTGCATTAATGAATCGGCCAACGC  
 GCGGGAGAGGCGGTTTGCATTGGGCGCTCTCCGCTTCTCGCTCACTGCTGCTGCGCTCGGTCGTTCCGGCTGCGGC  
 GAGCGGTATCAGCTCACTCAAAGGCGGTAATACGTTATCCACAGAATCAGGGGATAACGCAGGAAAGAACATGTGAGCAAAA  
 GCCAGCAAAAGGCCAGGAACCGTAAAAAGGCCGCGTTGCTGGCGTTTTTCCATAGGCTCCGCCCCCTGACGAGCATCACAAA  
 AATCGACGCTCAAGTCAGAGGTGGCGAAACCCGACAGGACTATAAAGATACCAGGCGTTTCCCCCTGGAAGCTCCCTCGTGCG  
 CTCTCCTGTTCCGACCCCTGCCGCTTACCGGATACCTGTCGCGCTTCTCCCTTCGGGAAGCGTGCGCGCTTCTCATAGCTCAGC  
 CTGTAGGTATCTCAGTTCGGTGTAGGTCGTTCCGCTCCAAGCTGGGCTGTGTGCACGAACCCCGCTTACGCCGACCCGCTGCG  
 CCTTATCCGGTAACTATCGTCTTGGTCCAACCCGGTAAGACACGACTTATCGCCACTGGCAGCAGCCACTGGTAACAGGATTA  
 GCAGAGCGAGGTATGTAGGCGGTGCTACAGAGTTCTTGAAGTGGTGGCCTAACTACGGCTACACTAGAAGGACAGTATTTGGTA  
 TCTGCGCTCTGCTGAAGCCAGTTACCTTCGAAAAAGAGTTGGTAGCTCTTATCCGGCAAACAAACCACCGCTGGTAGCGGTG  
 GTTTTTTGTTTGCAAGCAGCAGATTACGCGCAGAAAAAAGGATCTCAAGAAGATCCTTTGATCTTTTCTACGGGGTCTGACGCT  
 CAGTGAACGAAAACCTCACGTTAAGGGATTTTGGTCATGAGATTATCAAAAAGGATCTTACCTAGATCCTTTAAATTAATAAATG  
 AAGTTTTAAATCAATCTAAAGTATATAGTAAACTTGGTCTGACAGTTACCAATGCTTAAATCAGTGAGGCACCTATCTCAGCGAT  
 CTGTCTATTTTCGTTTCATCCATAGTTGCCTGACTCCCCGCTGTGTAGATAACTACGATACGGGAGGGCTTACCATCTGGCCCCAGT  
 GCTGCAATGATACCGCGAGACCCACGCTCACCGGCTCCAGATTTATCAGCAATAAACAGCCAGCCGGAAGGGCCGAGCGCAG  
 AAGTGGTCTGCAACTTTATCCGCTCCATCCAGTCTATTAATTGTTGCCGGGAAGCTAGAGTAAGTAGTTCGCCAGTTAATAGTT  
 TGCGCAACGTTGTTGCCATTGCTACAGGCATCGTGGTGTACGCTCGTCTGTTGGTATGGCTTCATTACAGCTCCGTTCCCAAC  
 GATCAAGGCGAGTTACATGATCCCCATGTTGTGCAAAAAAGCGGTTAGCTCCTTCGGTCCCGATCGTTGTGAGAAGTAAGTT  
 GGCCGAGTGTATCACTCATGGTTATGGCAGCACTGCATAATTCTTACTGTGCATGCCATCCGTAAGATGCTTTTCTGTGACTG  
 GTGAGTACTCAACCAAGTCATTCTGAGAATAGTGTATGCGGCGACCGAGTTGCTCTTGGCCGCGTCAATACGGGATAATACCG  
 CGCCACATAGCAGAACCTTTAAAGTGTCTCATATTGAAAACGTTCTTCCGGGGCGAAAACCTCTCAAGGATCTTACCGCTGTTGAG  
 ATCCAGTTCGATGTAACCCACTCGTGCACCCAACTGATCTTACGATCTTTTACTTTACCCAGCGTTTCTGGGTGAGCAAAAAACA  
 GGAAGGCAAAATGCCGCAAAAAAGGAATAAGGGCGACACGGAAATGTTGAATACTCAT

2.2.6 Vector 59: Pyl tRNA<sub>UCUA</sub> PylRS mCherry-P2A-eGFP(150TAGA)

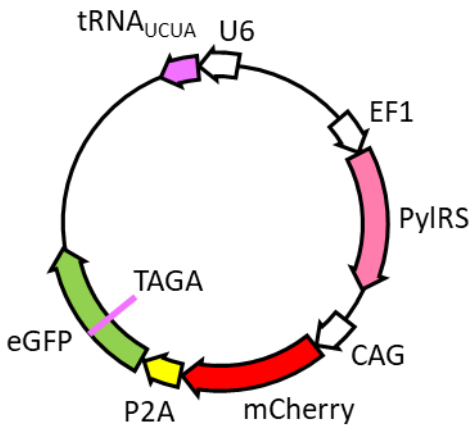

ACTCTTCCTTTTTCAATATTATTGAAGCATTATCAGGGTTATTGTCTCATGAGCGGATACATATTTGAATGTATTTAGAAAAATAA  
 CAAATAGGGGTTCCGCGCACATTTCCCGGAAAAGTGCCACCTAAATTTGTAAGCGTTAATATTTGTTAAAATTCGCGTTAAATTTTT  
 GTTAAATCAGCTCATTTTTTAACCATAAGCCGAAATCGGCAAAATCCCTTATAAAATCAAAAGAATAGACCGAGATAGGGTTGAGT  
 GTTGTCCAGTTTGAACAAGAGTCCACTATTAAGAACGTGGACTCCAACGTCAAAGGGCGAAAAACCGTCTATCAGGGCGAT  
 GGCCCACTACGTGAACCATCACCTAATCAAGTTTTTTGGGGTCGAGGTGCCGTAAGCACTAAATCGGAACCCCTAAAGGGAGC  
 CCCCATTAGAGCTTGACGGGGAAAGCCGGCGAACGTGGCGAGAAAGGAAGGGAAGAAAGCGAAAGGAGCGGGCGCTAGGG  
 CGCTGGCAAGTGTAGCGGTACGCTGCGCGTAACCACCACACCCGCGCGCTTAATGCGCCGCTACAGGGCGCGTCCCATTCC  
 GCCATTAGGTCGCAACTGTTGGGAAGGGCGATCGGTGCGGGCTCTTCGCTATTACGCCAGCTGGCGAAAGGGGGATGT  
 GCTGCAAGGCGATTAAGTTGGGTAACGCCAGGTTTTCCAGTACGACGTTGTAAAACGACGGCCAGTGAGCGCGCTCGTT  
 CATTACGTTTTTTGAACCCGTGGAGGACGGGCAGACTCGCGGTGCAATGTGTTTTACAGCGTGATGGAGCAGATGAAGATGCT  
 CGACACGCTGCAGAACACGCAGCTAGATTAACCCTAGAAAGATAATCATATTGTGACGTACGTTAAAGATAATCATGCGTAAAATT  
 GACGCATGTGTTTTATCGTCTGTATATCGAGGTTTTATTAATTTGAATAGATATTAAGTTTTATTATTTACACTTACATACTA  
 ATAATAAATTCACAAACAATTTATGTTTATTTATTTAATAAAAAACAAAAACTCAAAATTTCTTCTATAAAGTAACAAAACTT  
 TTATGAGGGACAGCCCCCCCCAAAGCCCCCAGGGATGTAATTACGTCCCTCCCCGCTAGGGGGCAGCAGCGAGCCGCCCG  
 GGGCTCCGCTCCGGTCCGGCGCTCCCCCGCATCCCCGAGCCGGCAGCGTGGGGGACAGCCGGGCACGGGGAAGGTGG  
 CACGGGATCGCTTCTCTGAACGCTTCTCGCTGCTTTGAGCCTGCAGACACCTGGGGGATACGGGAAAAGGCCATAAAAA  
 CCGCACTTGTC**CGGAAACCCCGGAACTCAACCCGGCTGAACGGATTAGAAAGTCCATTGATCTACATGATCAGGTTCCGG**  
 TGTTTC**GTCCCTCCACAAGATATAAAGCCAAAGAAATCGAAATCTTCAAGTTACGGTAAGCATATGATAGTCCATTTAAAC**  
**ATAATTTAAAACCTGCAAACTACCCAAGAAATTAATCTTCTACGTACGCTATTTGTACTAATATCTTTGTGTTTACAGTCAAAAT**  
**AATCTAATTATCTCTTAACAGCCTTGATCGTATATGCAAATATGAAGGAATCATGGGAAATAGGCCCTTCCCTGCCCAACC**  
**GTTGCGATCGCTCCGGTGCCGTCAGTGGGCAGAGCGCACATCGCCACAGTCCCGGAGAAGTTGGGGGGAGGGGTCCGGCAA**  
**TTGAACGGGTGCCTAGAGAAGGTGGCGCGGGGTAAACTGGGAAAGTGATGTCGTGACTGGCTCCGCTTTTTCCCGAGGGTG**  
**GGGGAGAACCATATAAGTGCAGTAGTCCCGTGAACGTTCTTTTTCGCAACGGGTTTGCCGCCAGAACACAGCTGAAGCTTC**  
**GAGGGCTCGCATCTCTCTTACGCGCCGCCCTACTGAGCCGCCATCCAGCCGTTGAGTCGCTTCTGCCGCT**  
**CCCCGCTGTGGTGCCTCCTGAACTGCGTCCGCTTAGGTAAGTTAAAGCTCAGGTCGAGACCCGGCTTTGTCCGGCGCT**  
**CCCTTGAGCCTACCTAGACTCAGCCGGCTCTCCAGCTTTGCTGACCCTGCTTGCTCAACTCTACGCTTTGTTTCGTTTTCT**  
**GTTCTGCGCGTTACAGATCCAAGCTGTGACCGGCGCTACTCTACAGATAGCGTTAAACTTACGCTTGCACC**ATGGCTAGC****  
**GACTACAAGGACGACGACGACAAGGACAAGAAGCCCTGAACACCCTGATCAGCGCCACAGGACTGTGGATGTCAGAAAC**  
**GGCACCATCCACAAGATCAAGCACACGAGGTGTCCGGTCCAAATCTACATCGAGATGGCTCGCCGATCACCTGTGTCG**  
**TCAACAACAGCAGAAGCAGCCGACAGCCAGACGCTCGCGCAACCAAGTACAGAAAGACCTGCAAGCCGGTGCAGAGTGT**  
**CCGACGAGGACCTGAACAAGTTCCTGACCAAGGCCAACGAGGACCAGACGCTGAAAGTGAAGGTGGTGTCCGCCCA**



GTGAAATTGTTATCCGCTCACAATTCCACACAACATACGAGCCGGAAGCATAAAGTGTAAGCCTGGGGTGCCTAATGAGTGAG  
 CTAACTCACATTAATTGCGTTGCGCTCACTGCCCGCTTTCCAGTCGGGAAACCTGTCGTGCCAGCTGCATTAATGAATCGGCCAA  
 CGCGCGGGGAGAGGGCGTTTTCGCTATTGGGCGCTCTTCCGCTTCCCTCGCTCACTGACTCGCTGCGCTCGGTTCGTTCCGGCTGCG  
 GCGAGCGGTATCAGCTCACTCAAAGGCGGTAATACGGTTATCCACAGAATCAGGGGATAACGCAGGAAAGAACATGTGAGCAAA  
 AGGCCAGCAAAAGGCCAGGAACCGTAAAAAGGCCGCGTTCGCTGGCGTTTTTCCATAGGCTCCGCCCCCTGACGAGCATACA  
 AAAATCGACGCTCAAGTCAGAGGTGGCGAAACCCGACAGGACTATAAAGATACCAGGCGTTTTCCCCCTGGAAGCTCCCTCGTGC  
 GCTCTCCTGTTCCGACCCTGCCGCTTACCGGATACCTGTCCGCTTTCTCCCTTCGGGAAGCGTGGCGCTTTCTCATAGCTCAC  
 GCTAGTGAACGAAAACCTCACGTTAAGGGATTTTGGTCATGAGATTATCAAAAAGGATCTTACCTAGATCCTTTTAAATTAAAAAT  
 GAAGTTTTAAATCAATCTAAAGTATATATGAGTAAACTTGGTCTGACAGTTACCAATGCTTAATCAGTGAGGCACCTATCTCAGCG  
 ATCTGTCTATTTTCGTTTCATCCATAGTTGCCTGACTCCCGCTCGTGTAGATAACTACGATACGGGAGGGCTTACCATCTGGCCCA  
 GTGCTGCAATGATACCGCGAGACCCACGCTCACCGGCTCCAGATTTATCAGCAATAAACAGCCAGCCGGAAGGGCCGAGCGC  
 AGAAGTGGTCTGCAACTTTATCCGCCCTCCATCCAGTCTATTAATTGTTGCCGGGAAGCTAGAGTAAGTAGTTCGCCAGTTAATA  
 GTTTGCGCAACGTTGTTGCCATTGCTACAGGCTACGTTGTTGTCACGCTCGTCTTTGGTATGGCTTCATTAGCTCCGGTTCCCA  
 ACGATCAAGGCGAGTTACATGATCCCCCATGTTGTGCAAAAAGCGGTTAGCTCCTTCGGTCTCCGATCGTTGTGAGAAGTAAG  
 TTGGCCGAGTGTATCACTCATGTTATGGCAGCACTGCATAATTCTTACTGTCATGCCATCCGTAAGATGCTTTTCTGTGAC  
 TGGTGAAGTACTCAACCAAGTCATTCTGAGAATAGTGTATGCGGGCAGCGAGTTGCTCTTGGCCGCGTCAATACGGGATAATAC  
 CGCGCCACATAGCAGAACCTTTAAAAGTGTCTATCATTGAAAACGTTCTTCGGGGCGAAAACCTCTCAAGGATCTTACCGCTGTTG  
 AGATCCAGTTCCGATGTAACCCACTCGTGCACCCAACTGATCTTCAGCATCTTTTACTTTACCAGCGTTTCTGGGTGAGCAAAAA  
 CAGGAAGGCCAAAATGCCGCAAAAAGGGAATAAGGGCGACACGGAAATGTTGAATACTCAT

**2.2.7 Vector 60: Pyl tRNA<sub>UCUA(Ev1)</sub> PyIRS mCherry-P2A-eGFP(150TAGA)**

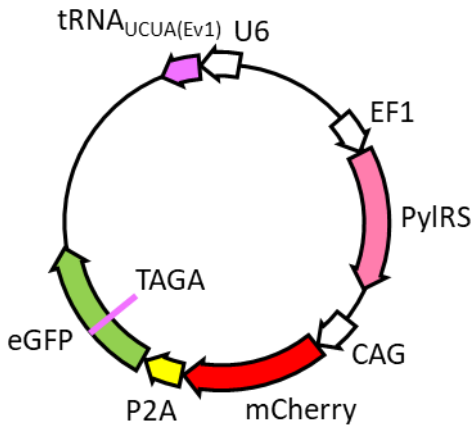

ACTCTTCTTTTCAATATTATTGAAGCATTTATCAGGGTTATTGTCTCATGAGCGGATACATATTTGAATGTATTTAGAAAAATAAA  
 CAAATAGGGGTTCCGCGCACATTTCCCGAAAAGTGCCACCTAAATTGTAAGCGTTAATATTTTGTAAAAATTCGCTTAAATTTTT  
 GTTAAATCAGCTCATTTTTTAAACCAATAGGCCGAAATCGGCAAAATCCCTTATAAATCAAAAGAATAGACCGAGATAGGGTTGAGT  
 GTTGTCCAGTTTGAACAAGAGTCCACTATTAAGAACGTGGACTCCAACGTCAAAGGGCGAAAAACCGTCTATCAGGGCGAT  
 GGCCCACTACGTGAACCATCACCTAATCAAGTTTTTGGGGTCGAGGTGCCGTAAGCACTAAATCGGAACCTAAAGGGAGC  
 CCCCAGTTAGAGCTTGACGGGGAAAGCCGGCGAACGTGGCGAGAAAGGAAGGAAGAAAGCGAAAGGAGCGGGCGCTAGGG  
 CGCTGGCAAGTGTAGCGGTACGCTGCGCGTAACCAACACACCCGCGCTTAATGCGCCGCTACAGGGCGCGTCCCATTC  
 GCCATTCAGGCTGCGCAACTGTTGGGAAGGGCGATCGGTGCGGGCCTTTCGCTATTACGCCAGCTGGCGAAAGGGGGATGT  
 GCTGCAAGGCGATTAAGTTGGGTAACGCCAGGGTTTTCCAGTACGACGTTGTA AACGACGGCCAGTGAGCGCGCCTCGTT  
 CATTACGTTTTTGAACCCGTGGAGGACGGGACAGCTCGCGGTGCAAAATGTGTTTTACAGCGTGATGGAGCAGATGAAGATGCT  
 CGACACGCTGCAGAACACGCAGCTAGATTAACCCTAGAAAGATAATCATATTGTGACGTACGTTAAAGATAATCATGCGTAAAT  
 GACGCATGTGTTTTATCGGTCTGTATATCGAGGTTTATTTAATTTGAATAGATATTAAGTTTTATTATTTACACTTACATACTA  
 ATAATAAATTCACAAACAATTTATTTATGTTTTATTTAATTTAAAAAACA AAAA ACTCAAATTTCTTCTATAAAAGTAACAAAACCT  
 TTATGAGGGACAGCCCCCCCCAAAGCCCCAGGGATGTAATTACGTCCCTCCCCCGCTAGGGGGCAGCAGCGAGCCGCCCG  
 GGGCTCCGCTCCGGTCCGGCGCTCCCCCGCATCCCCGAGCCGGCAGCGTGCGGGGACAGCCGGGCACGGGGAAGGTGG  
 CACGGGATCGCTTCTCTGAACGCTTCTCGCTGCTTTGAGCCTGCAGACACCTGGGGGGATACGGGGAAGGGCTAAAAA  
 CCGCACTTGT**CGGAAACCCCGGGAATCTAACCCGGCTGAACCGAGATTAGAGCCCATTCAGTCTACATGATCAGGTTCCG**  
 GTGTTTCGTCCTTTCCACAAGATATAAAGCCAAGAAATCGAAATACTTTCAAGTTACGGTAAGCATATGATAGTCCATTTAAAA  
 CATAATTTTAAACTGCAAACCTACCCAAGAAATTATTACTTTCTACGTCACGATTTTTGACTAATATCTTTGTGTTTACAGTCAAAT  
 TAATTCATATTCTCTCTAACAGCCTTGATCGTATATGCAAATATGAAGGAATCATGGGAAATAGGCCCTTTCCTGCCAACCC  
 GGTTGCGATCGCTCCGGTGCCCGTCAGTGGGCAGAGCGCACATCGCCACAGTCCCGGAGAAGTTGGGGGAGGGGTCCGGCA  
 ATTGAACGGGTGCTAGAGAAGGTGGCGCGGGTAAACTGGGAAAGTGATGTCGTGACTGGCTCCGCTTTTTCCCGAGGGT  
 GGGGGAACCGTATATAAGTGCAGTAGTCGCCGTGAACGTTCTTTTTTCGCAACGGGTTTCCCGCCAGAACACAGCTGAAGCTT  
 CGAGGGGCTCGCATCTCTCTTACGCGCCCGCCGCCCTACCTGAGGCCGCCATCCACGCCGTTGAGTTCGCTTCTGCCG  
 CTCCCGCTGTGGTGCCTCCTGAAGTGCCTCGCCGCTAGGTAAGTTAAAGCTCAGGTCGAGACCGGGCCTTTGTCCGGCG  
 CTCCTTGGAGCCTACCTAGACTCAGCCGGCTCTCCACGCTTTGCCTGACCCTGCTTGCTCAACTCTACGCTTTTGTTCGTTTT  
 CTGTTCTGCGCCGTTACAGATCCAAGCTGTGACCGGCGCCTACTCTACAGATAGCGTTTAAACTTACGCTTGCACCA**ATGGCTA**  
**CGCACTCAAGGACGACGACGACAAGACAAGAACCCCTGTAACACCCCTGATCAGCGCCACAGGACTGTGGATGCCAGAA**  
**CCGGCACCATCCACAAGATCAAGCACCCAGGTTGCCGGTCCAAAATCTACATCGAGATGGCCTCGCGCATCACCTGGT**  
**CGTCAACAACAGCAGAAGCAGCCGGACAGCCAGAGCCCTGCGGCACCACAAGTACAGAAAGACCTGCAAGCGGTGCAGAG**

TGTCGACGAGGACCTGAACAAGTTCCTGACCAAGGCCAACGAGGACCAGACCAGCGTGAAAGTGAAGGTGGTGTCCGCC  
CCACCCGGACCAAGAAAGCCATGCCAAGAGCGTGGCCAGAGCCCCAAGCCCTGAAAAACCCGAAGCCGCTCAGGCC  
CAGCCCAGCGGCAGCAAGTTCAGCCCCGCCATCCCCGTGTCTACCCAGGAAAGCGTCAGCGTCCCCGCCAGCGTGTCCACC  
AGCATCTCTAGCATCTCAACCGGGCCACAGCTTCTGCCCTGGTCAAGGGCAACACCAACCCCATCACCAGCATGTCTGCC  
CTGTGCAAGCCTCTGCCCCAGCCCTGACCAAGTCCCAGACCGACCGGCTGGAAGTGTCTCTGAACCCCAAGGACGAGATCA  
GCCTGAACAGCGGCAAGCCCTTCCGGGAGCTGGAAGCGAGCTGCTGAGCCGGCGGAAGAAGGACCTCCAGCAAATCTACG  
CCGAGGAACGGGAGAATCTCTGGCAAGCTGGAAGAGAGATCACCCGGTCTTCTGTGACCGGGGCTTCTGAAATCA  
AGAGCCCCATCTGATCCCCCTGGAGTACATCGAGCGGATGGGCATCGACAACGACACCCGAGCTGAGCAAGCAGATTTCCG  
GGTGGACAAGAACTTCTGCCTGCGGCCATGCTGGCCCCAACCTGTACAACCTGCGGAACTGGATCGCGCTCTGCC  
GACCCCATCAAGATTTTCGAGATCGGCCCTGCTACCGGAAAGAGAGCGACGGCAAAGAGCACCTGGAAGAGTTACAATGC  
TGAATTTTCCAGATGGGCAGCGGCTGCACCGAGGAGAACCTGGAATCCATCATCACCGACTTCTGAACCACCTGGGGAT  
CGACTTCAAGATCTGGGCGACGACTGCTGGTGACGGCAGACCCCTGGACGTGATGCACGGCGACTGGAATGTCTAG  
CGCGTCTGTGGACCCATCCCCTGACCGGGAGTGGGCATCGATAAGCCCTGGATCGGAGCGGCTTCCGCTGGAACG  
GCTGCTGAAAGTCAAGCAGACTTTAAGAACATCAAGCGGGGCTGCCAGAAGCGAGAGCTACTACAACGGCATCAGCACAA  
CCTGTGATGATAAGGATCCACTAGTCCAGTGTGGTGAATTGACATTGATTATTGACTAGTTATTAATAGTAATCAATTACGGGGT  
CATTAGTTCATAGCCCATATATGGAGTTCGCGTTACATAACTTACGGTAAATGCCCCGCTGGCTGACCGCCCAACGACCCCC  
GCCAATTGACGTCAATAATGACGTATGTTCCCATAGTAACGCCAATAGGGACTTTCCATTGACGTCAATGGGTGGAGTATTTACG  
GTAACCTGCCACTTGGCAGTACATCAAGTGTATCATATGCCAAGTACGCCCTTATTGACGTCAATGACGGTAAATGCCCCGCC  
TGGCATTATGCCAGTACATGACCTTATGGACTTTCTACTTTGGCAGTACATCTACGTATTAGTCATCGCTATTACCATGGTCGA  
GGTGGAGCCCCAGTTCGCTTACTCTCCCCATCTCCCCCCCCCTCCCCACCCCAATTTTGTATTTATTTATTTTAAATTTTTG  
TGCAGCGATGGGGGCGGGGGGGGGGGGGGGCGCGCCAGCGGGGGCGGGGCGGGGCGAGGGGCGGGGCGGGGCGAGGGC  
GGAGAGGTGCGGCGGCAGCCAATCAGAGCGGGCGCTCCGAAAGTTTCTTTTATGGCGAGGCGGGCGGGCGGGCGGGCCCT  
ATAAAAAGCAAGCGCGCGGGGGGGGGGAGTCTGCTGCTTCCCTCCCGCTGCCCGCTCCCGCGCCCGCTCCGCGCCG  
CGCCCCGCTCTGACTGACCGCTTACTCCCACAGTGTAGCGGGCGGACGGCCCTTCTCCTCCGGCTTAATTAAGCGTTG  
GTTTAAATGACGGCTCGTTTCTTTCTGTGGCTGCGTGAAGCCTTAAGGGCTCCGGGAGGGCCCTTTGTGCGGGGGGAGCG  
GCTCGGGGGGTGCGTGCCTGTGTGTGCTGGGGAGCGCCGCTGCGGCCCGCGCTGCCCGCGGCTGTGAGCGCTGCG  
GGCGCGCGCGGGGCTTTGTGCGCTCCGCGTGTGCGCGAGGGGAGCGCGGCCCGGGGCGGTGCCCGCGGTGCGGGGG  
GCTGCGAGGGGAACAAAGGCTGCTGCGGGGTGTGTGCGTGGGGGGTGTGAGCAGGGGGTGTGGCGCGGGGCTGGGGT  
TAACCCCCCTGCACCCCTCCCCGAGTTGCTGAGCACGGCCCGCTTCCGGTGCGGGGCTCCGTACGGGGCGTGGCGC  
GGGGCTCGCCGTGCCGGGCGGGGGTGGCGGCAGGTGGGGTGCGGGGCGGGGCGGGGCGCCCTCGGGCCGGGAGGG  
CTCGGGGAGGGGCGGGCGGCCCCCGGAGCGCGGGCGCTGTCGAGGCGGGCGAGCCGACCCATTGCCTTTTATGGTA  
ATCGTGCAGAGGGCGCAGGGACTTCCTTTGTCCAAATCTGTGCGGAGCCGAAATCTGGGAGCGCCGCGCACCCCTCTA  
CGGGTCCGGGGGCAAGCGGCTGCGCGCCCGCAGGAAGAAATGGGCGGGGAGGGCCCTCTGCTGCTGCCCGCGCCCT  
CCCCCTTCCCTCCAGCCTCGGGCTGCCCCGGGGGAGGACGGCTGCCCTTCCGGGGGACGGGGCAGGGCGGGTTCGGC  
TTCTGGCGTGTGACCGGGGCTCTAGAGCCTGTCTAACCATTGTTTCATGCCTTCTTTTCTTCTTCTTCTTCTTCTTCT  
TGTTATTGTGCTGTCTCATCATTTTTGGCAAAGAATTCGCCACCATGGTGAGCAAGGGCGAGGAGGATAACATGGCCATCATCA  
AGGAGTTCATGCGCTTCAAGGTGCACATGGAGGGCTCCGTGAACGGCCACGAGTTCGAGATCGAGGGCGAGGGCGAGGGCC  
GCCCTACGAGTGCACCCAGCCGCAAGCTGAAGGTGACCCAGGGTGGCCCCCTGCCCTTCGCTGGACATCCTGTCCC  
CTCAGTTCTAGGCTCAAGGCTACGTGAAGCACCCCGGACATCCCCGACTACTTGAAGCTGTCTTCCCCGAGGG  
CTTCAAGTGGGAGCGCTGAACCTTCGAGGACGGCGGCTGTTGACCGTACCCAGGACTCCTCCTCGAGGACGGCGA  
GTTTCATCTACAAGGTGAAGCTGCGCGCACCAACTTCCCTCCGACGGCCCCGTAATGCAGAAGAAGACCATGGGCTGGGA  
GGCCTCCTCCGAGCGGATGTACCCCGAGGACGGCGCCTGAAGGGCGAGATCAAGCAGAGGCTGAAGCTGAAGGACGGCG  
GCCACTACGACGCTGAGTCAAGACCACCTACAAGGCCAAGAAGCCCGTGCAGCTGCCCGGCGCCTACAACGTCAACATCA  
AGTTGGACATCACCTCCACAACGAGGACTACACCATCGTGAACAGTACGAAACGGCGCCGAGGGCCGCACTCCACCGCG  
GATGGACGAGCTGACGCTGGAGGCGCCCAATTTACGCTGTGAAACAGGCTGGCGACGTTGGCAAGAGAACCCTG  
GACCTGGACAAAAGTCCGTTGAGCAAGGGCGAGGAGCTGTTACCAGGGGTGGTGCCATCCTGGTTCGAGCTGGACGGCGACG  
TAAACGGCCACAAGTTCAGCGTGTCCGGCGAGGGCGAGGGCGATGCCACCTACGGCAAGCTGACCCTGAAGTTCATCTGCA  
CCACCGCAAGCTGCCCGTGCCTGGCCACCCTCGTACCACCTGACCTACGGCGTGCAGTGCTTACGCCGCTACCCCGA  
CCACATGAAGCAGCAGCATCTTCAAGTCCGCCATGCCGAAGGCTACGTCAGGAGCGCACCATCTTCTTCAAGGACGAC  
GGCAACTACAAGACCGCGAGGTGAAGTTCGAGGGCGACACCTGGTGAACCGCATCGAGCTGAAGGGCATCGACTTC  
AAGGAGGACGGCAACATCTGGGGCACAAGCTGGAGTACAACATAACAGCCACTAGAGTCTATATCATGGCCGACAAGCA  
GAAGAACGGCATCAAGGTGAACCTCAAGATCCGCCACAACATCGAGGACGGCAGCGTGCAGCTCGCCGACCACTACCAGCA  
GAACACCCCATCGGCGACGGCCCCGTGCTGCTGCCCGACAACCACTACCTGAGCACCCAGTCCGCCCTGAGCAAAGACC  
CAACGAGAAGCGGATCACATGGTCTGCTGGAGTTCGTGACCGCCGCGGGGATCACTCTCGGCATGGACGAGCTGTACAA  
GTAAGAATTAACCTCAGGTGCAGGCTGCCTATCAGAAGTGGTGGCTGGTGTGGCAATGCCCTGGCTCACAATACCACTG  
AGATCTTTTTCCCTCTGCCAAAATATGGGACATCATGAAGCCCTTGAAGTCTGACTTCTGGCTAATAAAGGAAATTTATTT  
TCATTGCAATAGTGTGTTGGAATTTTTGTGTCTCTCACTCGGAAGGACATATGGGAGGGGTCGACAATCAACCTCTGGATTACA  
AAATTTGTGAAAGATTGACTGGTATTCTTAACTATGTTGCTCCTTTTACGCTATGTGGATACGCTGCTTAAATGCCTTTGTATCATG  
CGTTAACTAACTTGTATTGACGCTTATAATGTTTACAATAAAGCAATAGCATCACAAATTTACAAATAAAGCATTTTTTTAC  
TGCATTTAGTTGGTTTTGTCCAAACTCATCAATGTATCTTATCATGTCTGGAATTGACTCAAATGATGTCAATTAGTCTATCAGA  
AGCTATCTGGTCCCTTCCGGGGGACAAGACATCCCTGTTTAAATTTAAACAGCAGTGTTCCAAACCTGGGTTCTTATATCCCT  
TGCTCTGGTCAACCAGGTTGCAGGGTTTTCTGTCTCACAGGAACGAAGTCCCTAAAGAAACAGTGGCAGCCAGGTTTAGCCCC  
GGAATTGACTGGATTCTTTTTAGGGCCATTGGTATGGCTTTTTCCCGTATCCCCCAGGTGTCTGCAGGCTCAAAGAGCAG  
CGAGAAGCGTTTCAGAGGAAAGCGATCCCGTGCACCTTCCCGTGCCTGGGCTGTCCCGCACGCTGCCGGCTCGGGGATGC  
GGGGGGAGCGCCGACCGGAGCGGAGCCCGGGCGGCTCGCTGCTGCCCTAGCGGGGGAGGGACGTAATTACATCCCTG  
GGGGCTTTGGGGGGGGGCTGCCCTGATATCTATAACAAGAAAATATATAATAAAGTTATCACGTAAGTAGAACATGAAATAA  
CAATAAATTCGTAATGATTAATGTTAAAGTCAAGTAAAGATAATCAATCGCTTATTTGACTCACCGGCTGTTATAGTTCA  
AATCAGTGACACTTACCGCATTGACAAGCAGCCTCACGGGAGCTCCAAGCGGCGACTGAGATGCTCTAAATGCACAGCGACG  
GATTCGCGCTATTTAGAAAGAGAGAGCAATATTTCAAGAATGCATGCGTCAATTTTACGCAACTATCTTTCTAGGGTTAATCTAG  
CTGCATCAGGATCATATCGTCGGGTCTTTTTCCGGCTCAGTCATCGCCAAAGCTGGCGCTATCTGGGCATCGGGGAGGAAGAA  
GCCCGTGCCTTTCCCGGAGGTTGAAGCGGATGGAAGAGTTTCCCGAGGATGACTGCTGCTGCATTGACGTTGAGCGAAA  
ACGCACGTTTACCATGATGATTCGGGAAGGTGTGGCCATGCACGCTTTAACCGGTGAAGTTCGTTACAGGCCACTGGGATAC  
CAGTTCGTCGCGGCTTTTCCGGACACAGTTCGGATGGTACGCCGAAGCGCATCAGCAACCCGAACAATACCGGCGACAGCC  
GGAATGCCGTGCCGGTGTGCAGATTAATGACAGCGGTGCGGCGCTGGGATATTACGTCAGCGAGGACGGGTATCCTGGCTG

GATGCCGCAGAAATGGACATGGATACCCCGTGAGTTACCCGGCGGGCGCGCTTGGCGTAATCATGGTCATAGCTGTTTTCTGT  
 GTGAAATTGTTATCCGCTCACAATTCACACAACATACGAGCCGGAAGCATAAAGTGTAAGCCTGGGGTGCTAATGAGTGAG  
 CTAACCTACATTAATTGCGTTGCGCTCACTGCCCGCTTTCCAGTCGGGAAACCTGTCGTGCCAGCTGCATTAATGAATCGGCCAA  
 CGCGCGGGGAGAGGCGGTTTGCATTTGGGCGCTCTCCGCTTCCCTCGCTCACTGACTCGCTGCGCTCGGTCTCGGCTGCG  
 GCGAGCGGTATCAGCTCACTCAAAGGCGGTAATACGGTTATCCACAGAATCAGGGGATAACGCAGGAAAGAACATGTGAGCAA  
 AGGCCAGCAAAGGCCAGGAACCGTAAAAAGGCCGCGTGTGCTGGCGTTTTTCCATAGGCTCCGCCCCCTGACGAGCATCACA  
 AAAATCGACGCTCAAGTCAGAGGTGGCGAAACCCGACAGGACTATAAGATACCAGGCGTTTTCCCTGGAAGCTCCCTCGTGC  
 GCTCTCCTGTTCCGACCCTGCCGCTTACCGGATACCTGTCCGCTTTCTCCCTTCGGGAAGCGTGGCGCTTTCTCATAGCTCAC  
 GCTGTAGGTATCTCAGTTCGGTGTAGTTCGCTCCAAGCTGGGCTGTGTGCACGAACCCCGTTCAGCCCGACCGCTGC  
 GCCTTATCCGTAACATATCGTCTTGTAGTCCAACCCGTAAGACAGACTTATCGCCACTGGCAGCAGCCACTGGTAAACAGGATT  
 AGCAGAGCGAGGTATGTAGGCGGTGCTACAGAGTCTTGAAGTGGTGGCTAACTACGGCTACACTAGAAGGACAGTATTTGGT  
 ATCTGCGCTCTGCTGAAGCCAGTTACCTTCGGAAAAAGAGTTGGTAGCTCTTGTATCCGGCAAACAAACCACCGCTGGTAGCGGT  
 GGTTTTTTTGTTCGCAAGCAGCAGATTACGCGCAGAAAAAAGGATCTCAAGAAGATCCTTTGATCTTTTACGGGGTCTGACG  
 CTCAGTGAACGAAAACCTCACGTTAAGGGATTTTGGTCATGAGATTATCAAAAAGGATCTTCACCTAGATCCTTTTAAATTAATAA  
 GAAGTTTTAAATCAATCTAAAGTATATATGAGTAAACTTGGTCTGACAGTTACCAATGCTTAATCAGTGAGGCACCTATCTCAGCG  
 ATCTGTCTATTTTCGTTTCATCCATAGTTGCCTGACTCCCGCTCGTGTAGATAACTACGATACGGGAGGGCTTACCATCTGGCCCA  
 GTGCTGCAATGATACCGCGAGACCCACGCTCACCGGCTCCAGATTTATCAGCAATAAACAGCCAGCCGGAAGGGCCGAGCGC  
 AGAAGTGGTCTGCAACTTTATCCGCTCCATCCAGTCTATTAATTGTTGCCGGAAGCTAGAGTAAGTAGTTCGCCAGTTAATA  
 GTTTGCGCAACGTTGTTGCCATTGCTACAGGCATCGTGGTGTACGCTCGTCTGTTGGTATGGCTTCATTCAGCTCCGTTCCCA  
 ACGATCAAGGCGAGTTACATGATCCCCATGTTGTGCAAAAAAGCGTTAGCTCCTTCGGTCTCCGATCGTTGTGCAAGTAAG  
 TTGGCCGAGTGTATCACTCATGTTATGGCAGCACTGCATAATTCTTACTGTATGCCATCCGTAAGATGCTTTTCTGTGAC  
 TGGTGAAGTACTCAACCAAGTCATTCTGAGAATAGTGTATGCGGCGACCGAGTTGCTCTTGGCCGCGTCAATACGGGATAATAC  
 CGCGCCACATAGCAGAACCTTAAAGTGTCTATCATTGAAAACGTTCTTCCGGGGCAAACCTCTCAAGGATCTTACCGCTGTTG  
 AGATCCAGTTCGATGAACCCACTCGTGCAACCAACTGATCTTCCAGCATTTTTACTTTTACCACGCTTTCTGGGTGAGCAAAAA  
 CAGGAAGGCAAAATGCCGCAAAAAAGGGAATAAGGGCGACACGGAATGTTGAATACTCAT

**2.2.8 Vector 61: Pyl tRNA<sub>UCUA(Ev2)</sub> PylRS mCherry-P2A-eGFP(150TAGA)**

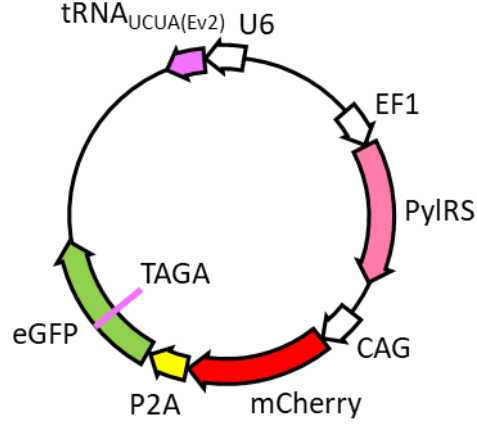

ACTCTTCTTTTCAATATTATTGAAGCATTATCAGGGTTATTGTCTCATGAGCGGATACATATTTGAATGTATTGAAAAATAA  
 CAAATAGGGGTTCCGCGCACATTTCCCGAAAAGTGCCACCTAAATTGTAAGCGTTAATATTTTGTAAAATTCGCTTAAATTTTT  
 GTTAAATCAGCTCATTTTTTAACCAATAGGCCGAAATCGGCAAAATCCCTTATAAATCAAAGAATAGACCGAGATAGGGTTGAGT  
 GTTGTCCAGTTTGAACAAGAGTCCACTATTAAGAACGTGGACTCCAACGTCAAAGGGCGAAAAACCGTCTATCAGGGCGAT  
 GGCCCACTAGTGAACCATCACCTAATCAAGTTTTTGGGGTCGAGGTGCCGTAAGCACTAAATCGGAACCCCTAAAGGGGAGC  
 CCCCATTAGCTTACCGGTTGACGGGAAAGCCGGCAACCTGGCGAGAAAGGAAGGAAAGGAAAGGAGCGGGCGCTAGGG  
 CGCTGGCAAGTGTAGCGGTACGCTGCGCTGACCCAGTACCCACCCGCGCTTAATGCGCCGCTACAGGGCGCGTCCCATT  
 GCCATTACGGTGCACACTGTTGGGAAGGGCGATCGGTGCGGGCCTCTTCGCTATTACGCCAGCTGGCGAAAGGGGGATGT  
 GCTGCAAGGCGATTAAGTTGGGTAACGCCAGGGTTTTCCAGTACGACGTTGTAACGACGGCCAGTGAGCGCGCCTCGTT  
 CATTACGTTTTTGAACCCGTGGAGGACGGGACGACTCGCGGTGCAAAATGTGTTTTACAGCGTGATGGAGCAGATGAAGATGCT  
 CGACACGCTGCAGAACCGCAGCTAGATTAACCCTAGAAAGATAATCATATTGTACGTACGTTAAAGATAATCATGCGTAAAAT  
 GACGCATGTGTTTTATCGTCTGTATATCGAGTTTTATTAATTTGAATAGATATTAAGTTTTATTATTTACACTTACATACTA  
 ATAATAAATTCAACAAACAATTTATTTATGTTATTTATTTATTAAAAAAACAACAACTCAAAATTTCTTCTATAAAGTAACAAA  
 ACTTTATGAGGGACAGCCCCCCCCAAAGCCCCAGGGATGTAATTACGTCCCTCCCCGCTAGGGGGCAGCAGCGAGCCGCCCG  
 GGGCTCCGCTCCGGTCCGCGCTCCCCCGCATCCCCGAGCCGGCAGCGTGCGGGGACAGCCCGGGCACGGGGAAGGTGG  
 CACGGGATCGTTTTCTCTGACGCTTCTCGTCTTTGAGCCTGCAGACACCTGGGGGGATACGGGAAAAGGCCATAAAA  
 CCGCACTTGTC**CGGA AACCCCGGAATCTAACCCGGCTGAAGCGGATTAGAGCCCATTCGATCTACATGATCAGGTTCCG**  
**GTGTTTCGTCTTTCCACAAGATATATAAAGCCAAGAAATCGAAATACTTTCAAGTTACGGTAAGCATATGATAGTCCATTTTAAA**  
**CATAATTTTAAACTGCAAACCTACCAAGAAATTTACTTTCTACGTCACGATTTTTGACTAATATCTTTGTGTTTACAGTCAA**  
**TAATTTCTAATTATCTCTCTAACAGCCTTGATCGTATATGCAAAATATGAAGGAATCATGGGAAATAGGCCCTC****TTCTGCCAACC**  
**GGTTGCGATCGCTCCGGTGCCCGTCAGTGGGCAGAGCGCACATCGCCACAGTCCCGGAGAAGTTGGGGGAGGGGTCCGCA**  
**ATTGAACGGGTGCTAGAGAAGGTGGCGGGGTAACCTGGGAAAGTGTGCTGTACTGGCTCCGCTTTTCCCGAGGGT**  
**GGGGGAGAACCCTATATAAGTGCAGTAGTCCGCTGAACGTTCTTTTTCGCAACGGGTTTGGCGCCAGAACACAGCTGAAGCTT**  
**CGAGGGGCTCGCATCTCTCTTACGCGCCCGCCGCCCTACCTGAGGCCGCCATCCACGCCGTTGAGTCGCGTTCTGCCGC**  
**CTCCCGCTGTGGTGCCTCCTGAACTGCGTCCGCGTCTAGGTAAGTTAAAGCTCAGGTCGAGACCGGGCTTTGTCCGGCG**  
**CTCCCTGGAGCCTACCTAGACTCAGCCGGCTCTCCACGCTTTGCTGACCCCTGCTTGTCTCAACTCTACGCTTTTGTTCGTTT**  
**CTGTTCTGCGCCTACAGATCCAAGCTGTGACCGGCTACTCTACAGATAGCGTTTAAACTTACGCTTCCACC****ATGGCTA**  
**GCGACTCAAGGACGACGACAAGGACAAGAAGCCCTGAACCCCTGATCAGCGCCACAGGACTGTGGATGTCCAGAA**  
**CCGGCACCATCCACAAGATCAAGCACACGAGGTGTCCGGTCCAAAATCTACATCGAGATGGCTGCGGCGATCACCTGTT**

CGTCAACAACAGCAGAAGCAGCCGGACAGCCAGAGCCCTGCGGCACCACAAGTACAGAAAGACCTGCAAGCGGTGCAGAG  
TGTCCGACGAGGACCTGAACAAGTTCCTGACCAAGGCCAACGAGGACCAGACCAGCGTGAAGTGAAGGTGGTGTCCGCC  
CCACCCGGACCAAGAAAGCCATGCCAAGAGCGTGCCAGAGCCCCAAGCCCTGGAAAACACCGAAGCCGCTCAGGCC  
CAGCCCAGCGGCAGCAAGTTCAGCCCCGCCATCCCCGTGTCTACCCAGGAAAGCGTCAGCGTCCCCGCCAGCGTGTCCACC  
AGCATCTCTAGCATCTCAACCGGCCACAGCTTCTGCCCTGGTCAAGGGCAACACCAACCCCATCACCAGCATGTCTGCC  
CTGTGCAAGCCTCTGCCACGCCCTGACCAAGTCCCAGACCAGCCGGTGGAAAGTGTCTCTGAAACCCCAAGGACGAGATCA  
GCCTGAACAGCGGCAGCCCTCCGGAGCTGAAAAGCGAGTGTCTGAGCCGGCGGAAGAAGGACCTCCAGCAAATCTACG  
CCGAGAACGGGAGAACTACCTGGGCAAGCTGGAAAGAGAGATCACCCGGTCTTCTCGTGACCCGGGCTTCTGGAAATCA  
AGAGCCCCATCTGATCCCCCTGGAGTACATCGAGCGGATGGGCATCGACAACGACACCGAGCTGAGCAAGCAGATTTCCG  
GGTGGACAAGAACTTCTGCTGCGGCCATGTGGCCCCAACCTGTACAACCTGCGGAAACTGGATCGCGCTCTGCC  
GACCCCATCAAGATTTTCGAGATCGGCCCTGTACCAGGAAAGAGAGCGACGGCAAAGAGCACCTGGAAGAGTTTACAATGC  
TGAACTTTTGCCAGATGGGCAGCGGCTGCACAGAGAGAACCTGGAATCCATCACCAGCTTTCTGAACCACTGGGGAT  
CGACTTCAAGATCGTGGGCAGCTGCATGGTGTACGGCGACACCTGGACGTGATGCACGGCGACCTGGAACCTGTCTAG  
CGCCGTCTGGGACCCATCCCTCTGGACCGGGAGTGGGCATCGATAAGCCCTGGATCGGAGCCGGCTTGGCCTGGAACG  
GCTGCTGAAAGTCAAGCAGACTTTAAGAACATCAAGCGGGCTGCCAGAAGCGAGAGCTACTACAACGGCATCAGCACCAA  
CCTGTGATGATAAGGATCCACTAGTCCAGTGTGGTGAATTGACATTGATTATTGACTAGTTATTAATAGTAATCAATTACGGGGT  
CATTAGTTCATAGCCCATATATGGAGTTCGCGTTACATAAATTACGGTAAATGGCCCGCTGGCTGACCGCCCAACGACCCCC  
GCCATTGACGTCAATAATGACGTATGTTCCCATAGTAACGCCAATAGGGACTTTCCATTGACGTCAATGGTGGAGATTTTACG  
GTAAACTGCCACTTGGCAGTACATCAAGTGTATCATATGCCAAGTACGCCCTTATTGACGTCAATGGTAAATGGCCCGC  
TGGCATTATGCCAGTACATGACCTTATGGGACTTTCTACTTGGCAGTACATCTACGTATTAGTCATCGCTATTACCATGGTCCA  
GGTGAGCCCCACGTTCTGCTTACTCTCCCCATCTCCCCCCCCCTCCCCACCCCAATTTTGTATTTATTTATTTTTAATTTTTG  
TGCAGCGATGGGGGCGGGGGGGGGGGGGGGGGGGCGCGGCCAGGCGGGGGCGGGGGCGGGGGCGAGGGGCGGGGGCGGGGGCGAGGG  
GGAGAGGTGCGGCGCAGCCAATCAGAGCGGCGCGCTCCGAAAGTTTCTTTTATGGCGAGGCGGGCGCGCGCGGGCCCT  
ATAAAAGCGAAGCGCGCGGGCGGGAGTCTGCTGCTTCCCTCGCCCGTGGCCCGTGGCCCGCTCCCGCGCCGCTCGCGCCG  
CGCCCCGGCTCTGACTGACCGGCTTACTCCACAGGTGAGCGGGCGGGACGGCCCTTCTCTCCGGGCTGTAATTAGCGCTTG  
GTTAATGACGGCTCGTTTCTTTTCTGTGGCTGCGTGAAGCCCTAAAGGGCTCCGGGAGGGCCCTTTGTGCGGGGGGGAGCG  
GCTCGGGGGGTGCGTGCCTGTGTGTGCTGCGTGGGAGCGCCCGCTGCGGCCCGCGCTGCCCGCGGGCTGTGAGCGCTGCG  
GGCGCGCGCGGGGCTTTGTGCGCTCCGCGTGTGCGCGAGGGGAGCGCGCGCCGGGGCGGTGCCCGCGGTGCGGGGGG  
GCTGCGAGGGGAACAAAGGCTGCGTGCGGGTGTGTGCTGCGTGGGGGGTGGAGCGGGGGTGGCGCGGGCGGCTCGGGCTG  
TAACCCCCCTGCACCCCCCTCCCCGAGTTGCTGAGCACGGCCGGCTTCGGGTGCGGGGCTCCGTACGGGGCGTGGCGC  
GGGGCTCGCGTGCAGGGCGGGGGTGGCGGCAGGTGGGGTGCAGGGCGGGGGCGGGGGCGCCTCGGGCCGGGGAGGG  
CTCGGGGAGGGGCGCGCGGCCCCCGAGCGCCGGCGGCTGTCGAGGCGCGGCGAGCCGACGCCATTGCCTTTTATGGTA  
ATCGTGCAGAGGGGCGCAGGACTTCTTTTCCCAAAATCTGTGCGGAGCCGAAATCTGGGAGGCGCCCGCCGACCCCTCTA  
CGGGGCGCGGAGCGGTGCGGCGCGCAGGAAGAAATGGCGGGGAGGGCTTCTGCTGCTCGCCCGCCCGCT  
CCCCCTTCCCTTCCAGCCTCGGGCTGTCCGCGGGGGACGGCTGCTTCCGGGGGACGGGGCAGGGCGGGGTTCCGGC  
TTCTGGCGTGTGACCGGGCTCTAGAGCCTCTGCTAACCATGTTTATGCTTCTTCTTTTCTTCTACAGCTCCTGGGCAACGTGC  
TGTTATTGTGCTGTCTCATCATTTTTGGCAAAGAATTCGCCACCATGGTGAGCAAGGGCGAGGAGGATAACATGGCCATCATCA  
AGGAGTTTATGCGCTTCAAGGTGCACATGGAGGGCTCCGTGAACGGCCACGAGTTCGAGATCGAGGGCGAGGGCGAGGGCC  
GCCCTACGAGGGCACCCAGCCGCAAGCTGAAGTGAACAGGGTGGCCCTGCCCTCGCTGGACATCTGTCC  
CTCAGTTATGTACGGCTCAAGGCCTACGTGAAGCACCCCGCCGACTACCCCGACTACTTGAAGTGCCTTCCCGGAGGG  
CTTCAAGTGGGAGCGCTGATGAACTTCGAGGACGGCGGGTGGTACCCTGACCCAGGACTCCTCCTGCAGGACGGCGA  
GTTTATCTACAAGGTGAAGCTGCGGGCACCAACTTCCCTCCGACGGCCCCGTAAATGCAGAAGAAGACCATGGGCTGGGA  
GGCCTCCTCCGAGCGGATGTACCCGAGGACGGCGCCCTGAAGGGCGAGATCAAGCAGAGGCTGAAGCTGAAGGACGGCG  
GCCACTACGACGCTGAGGTCAAGACCCACTACAAGGCCAAGAAGCCCGTGCAGCTGCCCGGGCCTACAACCTCAACATCA  
AGTTGGACATCACTCCACAACGAGACTACACCTCGTGAACAGTACGAACGGCCGAGGGCGCCACTCCACCTCCAGCGG  
GCATGGACGAGCTGTACCGCTCTGGAGGCGCCACCAATTTAGCCTGCTGAAACAGGCTGGCGACGTGGAAGAGAACCCTG  
GACCTGGACAAAAGTCCGTGAGCAAGGGCGAGGAGCTGTTACCAGGGGTGGTGGCCATCCTGGTGCAGCTGGACGGCGACG  
TAAACGGCCACAAGTTCAGCGTGTCCGGCGAGGGCGAGGGCGATGCCACCTACGGCAAGCTGACCCTGAAGTTTATCTGCA  
CCACCGGAAGCTGCCCGTCCCTGGCCACCCCTGTGACCACCTGACCTACGGCGTGCAGTGTCTCAGCCGCTACCCCGA  
CCACATGAAGCAGCAGACTTCTTCAAGTCCGCTACCCGAGGCTACGTCAGGAGCGCACCATCTTCTTCAAGGACGAC  
GGCAACTACAAGACCCCGCGGAGGTGAAGTTCGAGGGCGACACCCTGGTGAACCGCATCGAGCTGAAGGGCATCGACTTC  
AAGGAGGACGGCAACATCTGGGGCACAAGCTGGAGTACAACCTACAACAGCCACTAGAGTCTATATCATGGCCGACAAGCA  
GAAGAACGGCATCAAGGTGAACCTTCAAGATCCGCCACAACATCGAGGACGGCAGCGTGCAGCTGCGCGACCACTACCAGCA  
GAACACCCCATCGGCGACGGCCCGTGTGCTGCCGACAACCACTACCTGAGCACCCAGTCCGCCCTGAGCAAAGACCC  
CAACGAGAAGCGGATCACATGCTCTGAGTCTGAGTCTGACCGCCGGGATCACTCTCGCATGGACGAGCTGTACAA  
GTAAGAATTCACTCCTCAGGTGCAGGCTGCCTATCAGAAGGTGGTGGCTGGTGTGGCCAATGCCCTGGCTCACAAATACCACTG  
AGATCTTTTTCCCTCTGCCAAAATATGGGGACATCATGAAGCCCTTGGATCTGACTTCTGGCTAATAAAGGAAATTTATTT  
TCATTGCAATAGTGTGTTGGAATTTTTGTGTCTCTCACTCGGAAGGACATATGGGAGGGTGCACAATCAACCTCTGGATTACA  
AAATTTGTGAAAGATTGACTGGTATTCTTAACATATGTTGCTCCTTTTACGCTATGTGGATACGCTGCTTAAATGCCTTTGTATCATG  
CGTAACTAAACTTGTATTTGAGCTTATAATGGTTACAATAAAGCAATAGCATCACAAATTTACAATAAAGCATTTTTTTTAC  
TGCATTCAGTTGTGGTTTGTCCAAACTCATCAATGTATCTTATCATGTCTGGAATTGACTCAAATGATGTCAATTAGTCTATCAGA  
AGCTATCTGGTCTCCCTCCGGGGGACAAGACATCCCTGTTAATATTTAAACAGCAGTGTTCCAAACCTGGGTTCTTATATCCCT  
TGCTCTGGTCAACCAGTTGCAGGGTTTCTGTCTCACAGGAACGAAGTCCCTAAAGAAACAGTGGCAGCCAGGTTTAGCCCC  
GGAATTGACTGGATTCTTTTTTAGGGCCATTGGTATGGCTTTTTCCCCGATCCCCCAGGTGTCTGCAGGCTCAAAGAGCAG  
CGAGAAGCGTTAGAGGAAAGCGATCCCGTGCACCTTCCCCGTGCCCGGGCTGTCCCCGACGCTGCCGGCTCGGGGATGC  
GGGGGAGCGCCGACCGGAGCGGAGCCCGGGCTCGCTGCTGCCCTAGCGGGGAGGGACGTAATTACATCCCTG  
GGGGTTTTGGGGGGGGCTGTCCCTGATATCTATAACAAGAAATATATATAATAAGTTATACGTAAGTGAACATGAAATAA  
CAATATAATTATCGTATGAGTTAAATCTTAAAAGTACGTAAGAATAATCATGCGTCATTTTGACTCACGCGGTGTTATAGTTCA  
AAATCAGTGACACTTACCGCATTGACAAGCAGCCTCACGGGAGCTCCAAGCGGCGACTGAGATGTCTAAATGCACAGCGACG  
GATTCGCGCTATTTAGAAAGAGAGGCAATATTTCAAGAATGCATGCGTCAATTTTACGACACTATCTTTTACGGGTTAATCTAG  
CTGCATCAGGATCATATCGTGGGCTTTTTTCCGGCTCAGTATCGCCCAAGCTGGCGCTATCTGGGCATCGGGGAGGAAGAA  
GCCCCGTCCCTTTCCCGCAGGTTGAAGCGGCATGGAAGAGATTTGCCGAGATGACTGCTGCTGCAATTGACGTTGAGCGAAA  
ACGCACGTTTACCATGATGATTCCGGGAAGGTGTGGCCATGCACGCTTTAACGGTGAACGTTTCTGTTACAGGCCACCTGGGATAC  
CAGTTCGTCGCGCTTTTCCGGACACAGTTCGGATGGTACGCCGAAGCGCATCAGCAACCCGAACAATACCGGCGACAGCC



GGAAGTCCGTCGCCGGTGTGCAGATTAATGACAGCGGTGCGGCGCTGGGATATTACGTCAGCGAGGACGGGTATCCTGGCTG  
 GATGCCGCAGAAATGGACATGGATACCCCGTGAGTTACCCGGCGGGCGCGCTTGGCGTAATCATGGTCATAGCTGTTTCCTGT  
 GTGAAATTGTTATCCGCTCACAAATCCACACAACATACGAGCCGGAAGCATAAAGTGTAAGCCTGGGGTGCTAATGAGTGAG  
 CTAATCACAATTAATTGCGTTGCGCTCACTGCCCGCTTCCAGTCGGGAAACCTGTGCTGCCAGCTGCATTAATGAATCGGCCAA  
 CGCGCGGGGAGAGGGCGTTTGGCTATTGGGGCGCTTCCGCTTCCCTCGCTCACTGACTCGCTGCGCTCGGTCGTTCCGGCTGCG  
 GCGAGCGGTATCAGCTCACTCAAAGGCGGTAATACGGTTATCCACAGAATCAGGGGATAACGCAGGAAAGAACATGTGAGCAAA  
 AGGCCAGCAAAAGGCCAGGAACCGTAAAAAGGCCGCGTTGCTGGCGTTTTCCATAGGCTCCGCCCCCTGACGAGCATCACA  
 AAAATCGACGCTCAAGTCAGAGGTGGCGAAAACCCGACAGGACTATAAAGATACCAGGCGTTTTCCCCCTGGAAGCTCCCTCGTGC  
 GCTCTCCTGTTCCGACCCTGCCGCTTACCGGATACCTGTCCGCTTTCTCCCTTCGGGAAGCGTGGCGCTTTCTCATAGCTCAC  
 GCTGTAGGTATCTCAGTTCGGTGTAGGTCGTTCCGCTCAAGCTGGGCTGTGTGCACGAACCCCGTTCCAGCCCACCGCTGC  
 GCCTTATCCGGTAACTATCGTCTTGAGTCCAACCCGGTAAGACACGACTTATCGCCACTGGCAGCAGCCACTGGTAACAGGATT  
 AGCAGAGCGAGGTATGTAGGCGGTGTACAGAGTTCTTGAAGTGGTGGCTAACTACGGCTACACTAGAAGGACAGTATTTGGT  
 ATCTGCGCTGTCTGAAGCCAGTTACCTTCGGAAGAGTTGGTAGCTTTGATCCGGCAAAACAAACCACCGCTGGTAGCGGT  
 GGTTTTTTTGTGGCAAGCAGCAGATTACGCGCAGAAAAAAGGATCTCAAGAAGATCCTTTGATCTTTTCTACGGGGTCTGACG  
 CTCAGTGAACGAAAACCTCACGTTAAGGGATTTTGGTCATGAGATTATCAAAAAGGATCTTCACCTAGATCCTTTTAAATTAATAA  
 GAAGTTTTAAATCAATCTAAAGTATATGAGTAAACTTGGTCTGACAGTTACCAATGCTTAATCAGTGAGGCACCTATCTCAGCG  
 ATCTGTCTATTTTCTTATCCATAGTTGCCTGACTCCCGCTCGTGTAGATAACTACGATACGGGAGGGCTTACCATCTGGCCCCA  
 GTGTGCAATGATACCGCGAGACCCACGCTCACCAGGCTCCAGATTTATCAGCAATAAACCAGCCAGCCGGAAGGGCCGAGCGC  
 AGAAGTGGTCTGCAACTTTATCCGCTCCATCCAGTCTATTAATTGTTGCCGGAAGCTAGAGTAAGTAGTTCGCCAGTTAATA  
 GTTTGCCAACGTTGTTGCCATTGCTACAGGCATCGTGGTGTACGCTCGTCTTTGGTATGGCTTCATTACAGCTCCGGTTCCCA  
 ACGATCAAGGCGAGTTACATGATCCCCATGTTGTGCAAAAAGCGGTTAGCTCCTTCGGTCTCCGATCGTTGTGAGAAGTAAG  
 TTGGCCGCAAGTGTATCACTCATGTTATGGCAGCACTGCATAATTCTTACTGTATGCCATCCGTAAGATGCTTTTCTGTGAC  
 TGGTGTACTCAACCAAGTCACTTCTGAGAATAGTGTATGCGGGCAGCCGAGTTGCTCTTGGCCGCGTCAATACGGGATAATAC  
 CGCGCCACATAGCAGAACTTTAAAAGTGCTCATCATTGAAAAACGTTCTTCGGGGCAGAAAACCTCAAGGATCTTACCGCTGTTG  
 AGATCCAGTTCGATGTAACCCACTCGTGCACCCAACTGATCTTCAGCATCTTTTACTTTACCAGCGTTTCTGGGTGAGCAAAAA  
 CAGGAAGGCAAAATGCCGCAAAAAGGGAATAAGGGCGACACGAAATGTTGAATACTCAT

2.2.9 Vector 62: Pyl tRNA<sub>CUAG</sub> PylRS mCherry-P2A-eGFP(150CTAG)

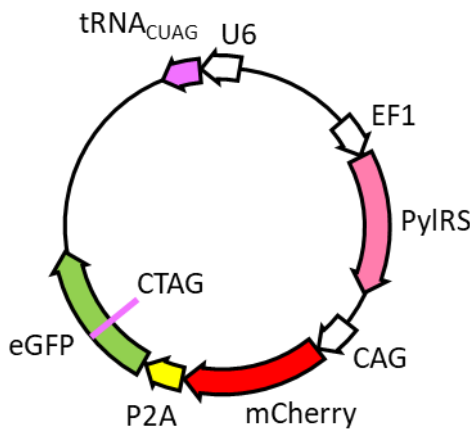

ACTCTTCTTTTCAATATTATTGAAGCATTATCAGGGTTATTGTCTCATGAGCGGATACATATTTGAATGTATTTAGAAAAATAA  
 CAAATAGGGGTTCCGCGCACATTTCCCGAAAAGTGCCACCTAAATGTAAGCGTAAATATTTGTTAAAATTCGCGTAAATTTTT  
 GTTAAATCAGCTCATTTTTTAAACCAATAGCCGAAAATCGGCAAAATCCCTTATAAATCAAAAGAATAGACCGAGATAGGGTTGAGT  
 GTTGTTCCAGTTTGAACAAGAGTCCACTATTAAGAACGTTGGACTCCAACGTCAAAGGGCGAAAAACCGTCTATCAGGGCGAT  
 GGCCACTACGTGAACCATACCATAAGTTTTTTGGGGTCGAGGTGCCGTAAGCACTAAATCGGAACCCATAAAGGGGAGC  
 CCCCAGTTTAGAGCTTGACGGGGAAAGCCGGCGAACGTGCGCAGAAAAGGAAGGGAAGAAAGCGAAAAGGAGCGGGCGCTAGGG  
 CGCTGGCAAGTGTAGCGGTACGCTGCGGTAACCACCACACCCGCCGCGCTTAATGCGCCGCTACAGGGCGCGTCCCATTC  
 GCCATTCAGGCTGCGCAACTGTTGGGAAGGGCGATCGGTGCGGGCCTCTTCGCTATTACGCCAGCTGGCGAAAGGGGGATGT  
 GCTGCAAGGGGATTAAGTTGGGTAACGCCAGGGTTTTCCAGTACGACGTTGTA AACGACGGCCAGTGAGCGCGCCTCGTT  
 CATTACGTTTTTGAACCCGTGGAGGACGGGCAGACTCGCGGTGCAAAATGTGTTTTACAGCGTGATGGAGCAGATGAAGATGCT  
 CGACACGCTGCAGAACACGCAGCTAGATTAACCCTAGAAAAGATAATCATATTGTGACGTACGTTAAAGATAATCATGCGTAAAAT  
 GACGCATGTGTTTTATCGGTCTGTATATCGAGGTTATTTAATTTGAATAGATATTAAGTTTTATTATTTACACTTACATACTA  
 ATAATAAATTCAACAAACAATTTATTTATGTTATTTATTTATTA AAAAAAACAAAACTCAAAATTTCTTCTATAAAGTAACAAAATT  
 TTATGAGGGACAGCCCCCCCCAAAGCCCCAGGGATGTAATTACGTCCCTCCCCCGCTAGGGGGCAGCAGCGAGCCGCCCG  
 GGGCTCCGCTCCGGTCCGGCTCCCGCCGATCCCGAGCCCGCAGCGTGCGGGGACAGCCGGGCACGGGAAGGTGG  
 CACGGGATCGTTTTCTCTGAACGCTTCTCGTGTCTTTGAGCCTGCAGACACCTGGGGGATACGGGGAAAAGGCCATAAAAA  
 CCGCACTTGTCCGAAACCCCGGAAATCTAACCCGGCTGAACGGATTCTAGAGTCCATTGATCTACATGATCAGGTTTCCGG  
 TGTTCGTCCTTTCCACAAGATATATAAAGCCAAGAAATCGAAATACTTTCAAGTTACGGTAAGCATATGATAGTCCATTTTAAAC  
 ATAATTTTAAAAGTCAAACCTACCCAAGAAATTAATCTTTCTACGTCACGATTTTTGACTAATATCTTTGTGTTTACAGTCAAAT  
 AATTCTAATTAATCTCTTAACAGCCTTGATCGTATGCAATATGAAGGAATCATGGGAAATAGGCCCTTTCCTGCCCAACCCG  
 GTTGCAGTCCGTCGCTCCGCTCAGTGGGCAGAGCCACATCGCCACAGTCCCGGAGAAGTTGGGGGAGGGTCCGGCAA  
 TTGAACGGGTGCCTAGAGAAGGTGGCGCGGGTAAACTGGGAAAGTGATGTCGTGACTGGCTCCGCCTTTTCCCGAGGGTG  
 GGGGAGAACCCTATATAAGTGCAGTAGTCGCCGTGAACGTTCTTTTTCGCAACGGGTTTGGCCGACAGACAGCTGAAGCTTC  
 GAGGGGCTCGCATCTCTCTTACGCGCCCGCCGCCCTACCTGAGGCCGCCATCCACGCCGTTGAGTGCAGTCTTCCGCGCT  
 CCCGCTGTGTTGCTCCTCTGAACCTGCGTCCGCGCTCAGTTAAGCTTAAAGCTCAGGTCGAGACCCGGCCCTTTGTCCGGCGCT  
 CCTTGGAGGCTACCTAGACTCAGCGGCTCTCCAGCTTAAGTTCAGCTGACCCTGTTGCTCAACTACGCTTTTGTCTGTTTTCT  
 GTTCTGCGCGTTACAGATCCAAGCTGTGACCGCGCCTACTCTACAGATAGCGTTTAAACTTACGCTTACCCTGCCACCATTGGCTAGC  
 GACTACAAGGACGACGACGACAAGGACAAGAAGCCCTGAACACCCTGATCAGCGCCACAGGACTGTGGATGTCCAGAACC

GGCACCATCCACAAGATCAAGCACACGAGGTGCCGGTCCAAAATCTACATCGAGATGGCCTGCGGCGATCACCTGGTCG  
TCAACAACAGCAGAAGCAGCCGACAGCCAGAGCCCTGCGGCACCACAAGTACAGAAAACCTGCAAGCGGTGCAGAGTGT  
CCGACGAGGACCTGAACAAGTTCCTGACCAAGGCCAACGAGGACCAGACCAGCGTGAAAGTGAAGTGGTGTCCGCCCCCA  
CCCGGACCAAGAAAAGCCATGCCAAGAGCGTGGCCAGAGCCCCAAGCCCCTGGAAAACACCGAAGCCGCTCAGGCCAG  
CCCAGCGGCAGCAAGTTCAGCCCCGCCATCCCCGTGTCTACCCAGGAAAAGCGTACGCGTCCCCGCCAGCGTGTCCACCAGC  
ATCTCTAGCATCTCAACCGGCGCCACAGCTTTCGCCCTGGTCAAGGGCAACACCAACCCCATCACCAGCATGTCTGCCCTGT  
GCAAGCCTCTGCCCCAGCCCTGACCAAGTCCCAGACCGACCCGCTGGAAGTGTCTCTGAACCCCAAGCAGCATGACCT  
GAACAGCGGCAAGCCCTTCGCGGAGCTGGAAGAGAGTCTGCTGAGCCGCGGAAGAAGGACCTCCAGCAAATCTACGCGG  
AGGAACGGGAGAACTACCTGGGCAAGCTGGAAGAGAGATCACCCGTTCTTCGTGGACCGGGGCTTCTGGAAATCAAGA  
GCCCCATCCTGATCCCCCTGGAGTACATCGAGCGGATGGGCATCGACAACGACACCGAGCTGAGCAAGCAGATTTTCCGGGT  
GGACAAGAATTCTGCCTGCGGCCATGCTGGCCCCAACCTGTACAACCTACCTGCGGAAACTGGATCGCGCTGCCCCGAC  
CCCATAAGATTTTCGAGATCGGCCCTGCTACCGGAAAAGAGAGCAGCGGCAAGAGCACCTGGAAAGTTCACAATGTGA  
ACTTTTCCAGATGGGACGCGCTGACCAGAGAACTGGAATCATCATCACCAGCTTTTGAACCAAGTTCGGATCGA  
CTTCAAGATCGTGGGCGACAGCTGCATGGTGTACGGCGACACCCTGGACGTGATGCACGCGACCTGGAAGTGTCTAGCGC  
CGTGTGGGACCCATCCCTCTGGACCGGGAGTGGGGCATCGATAAGCCCTGGATCGGAGCCGGCTTCCGCTGGAACGGCT  
GCTGAAAGTCAAGCAGGACTTTAAGAATCAAGCGGGTGCAGAAAGCGAGAGCTACTACAACGGCATCAGCACCAACT  
GTGATGATAAGGATCCACTAGTCCAGTGTGGTGAATTGACATTGATTATTGACTAGTTATTAATAGTAATCAATTACGGGGT  
TAGTTCATAGCCATATATGGAGTTCGCGTTACATAACTACGGTAAATGGCCCGCTGGCTGACCGCCCAACGACCCCGCC  
CATTGACGTCAATAATGACGTATGTTCCCATAGTAACGCCAATAGGGACTTTCCATTGACGTCAATGGGTGGAGTATTTACG  
AACTGCCCACTTGGCAGTACATCAAGTGTATCATATGCCAAGTACGCCCTATTGACGTCAATGACGGTAAATGGCCCGCCTG  
GCATTATGCCAGTACATGACCTTATGGGACTTTCTACTTGGCAGTACATCTACGTATTAGTCATCGCTATTACCATGGT  
TGAGCCCCACGTTCTGCTTCACTCTCCCCATCTCCCCCCCCCTCCCCACCCCAATTTGTATTTATTTATTTTAAATTTTGT  
CAGCGATGGGGGCGGGGGGGGGGGGGGGGGGGGGGGGGGGGGGGGGGGGGGGGGGGGGGGGGGGGGGGGGGGGGGGGG  
GAGAGGTGCGCGGCGAGCCAATCAGAGCGGCGCGCTCCGAAAGTTTCTTTTATGGCGAGGCGGCGCGCGCGCGCGCTAT  
AAAAAGCGAAGCGCGCGGGGGGGGGGGGGGGGGGGGGGGGGGGGGGGGGGGGGGGGGGGGGGGGGGGGGGGGGGGGG  
CCCCGGCTCTGACTGACCGGCTTACTCCACAGGTGAGCGGGCGGGACGCGCCCTTCTCCTCCGGGCTGTAATTAGCGCTT  
TTAATGACGGCTCGTTTCTTTCTGTGGCTGCGTGAAGGCTTAAAGGGCTCCGGGAGGGCCCTTGTGCGGGGGGGAGCGGC  
TCGGGGGGTGCCTGCGTGTGTGTGCGTGGGGAGCGCCGCTGCGGCCCGCGCTGCCCGCGGCTGTGAGCGCTGCGGG  
CGCGCGCGGGGCTTTGTGCGCTCCGCTGTGCGGAGGGGAGCGCGCGGGGGGGGGGGGGGGGGGGGGGGGGGGGGGG  
GCGAGGGGAACAAGGCTGCGTGCAGGGTGTGTGCGTGGGGGGTGTGAGCAGGGGGTGTGGGCGCGGGCTGCGGGCTGTA  
CCCCCCCCCTGCACCCCCCTCCCGAGTTGCTGAGCACGGCCCGGCTTCCGGTGCGGGGCTCCGTACGGGGCGTGGCGCGGG  
GCTCGCCGTGCCGGGCGGGGGTGGCGCAGGTGGGGGTGCCGGGCGGGGCGGGGCCCGCTCGGGCCGGGAGGGCTCG  
GGGGAGGGGCGCGGGGCCCGGAGCGCGGGCTGTGCGAGGCGCGGGGAGCCGACGCCATTGCTTTTATGGTAATCG  
TGGAGAGGGGCGCAGGACTTCTTTGCCAAATCTGTGCGGAGCCGAAATCTGGAGGCGCCCGCACCCCTCTAGCG  
GGCGCGGGGCAAGCGGTGCGCGCGCGCAGGAAGGAAATGGCGGGGAGGGGCTTCTGCGTGCCTGCGCGCGCGCTCC  
CTTCTCCCTCTCCAGCCTCGGGGCTGTCCGCGGGGGACGGCTGCCTTCCGGGGGGACGGGGCAGGGCGGGGTTCCGGCTC  
TGGCGTGTGACCGGGCGCTTAGAGCCCTGCTAACCATGTTTCATGCCTTCTTCTTTTCTACAGCTCCTGGGCAACGTGCTG  
GTTATTGTGCTGTCTCATCATTTTGGCAAAGAATTGCGCCACCATGGTGAGCAAGGGCGAGGAGGATAACATGGCCATCAAA  
GGAGTTCATCGCTTCAAGGTGCATGGAGGGCTCCGTGAACGGCCAGGTTTCGAGATCGAGGGCGAGGGCGAGGGCC  
GCCCTACGAGGCCACAGCCCAAGCTGAAGTGAACAGGGCTGACCCCTGCCCCCTGCCCTTCCCTGGGACTCCTGTCCC  
CTCAGTTCATGTACGGCTCAAGGCCTACGTGAAGCACCCGCGGACATCCCCGACTACTTGAAGTGTCTTCCCCGAGGG  
CTTCAAGTGGGAGCGGTGATGAACCTCGAGGACGGCGGGCTGGTACCCTGACCCAGGACTCCTCCCTGCAGGACGGCGA  
GTTTCATCTACAAGGTGAAGTGCAGCGCACCAACTTCCCTCCGACGGCCCCGTAATGCAGAAGAAGACCATGGGCTGGGA  
GGCCTCCTCGAGCGGATGTACCCCGAGGACGGCGCCCTGAAGGGCGAGATCAAGCAGAGGCTGAAGTGAAGGACGGCG  
GCCACTACGCTGAGTCAAGACCACCTACAAGGCCAAGAAGCCGCTGACGCTGCCCGGCGCTCAACAGTCAACATCA  
AGTTGGACATCACTCCACAACGAGGACTACACCATCGTGAACAGTACGAACGCGCCGAGGGCGCCACTCCACCGCG  
GCATGGACGAGCTGACGCGTCTGGAGGCGCCACCAATTTAGCCTGCTGAAACAGGCTGGCGACGTGGAAGAGAACCCTG  
GACCTGGACAAAAGTCGGTAGCAAGGGCGAGGAGCTGTTACCGGGGTGGTGCCATCCTGGTGCAGCTGGACGGCGACG  
TAAACGGCCACAAGTTCAGCGTGTCCGGCGAGGGCGAGGGCGATGCCACCTACGGCAAGCTGACCTGACAGTTCATCTGCA  
CCACCGGCAAGCTGCCCGTCCCTGCCACCCCTGACCCACTGACCTACCGCGTGCAGTGTTCAGCTGCTACCCGCA  
CCACATGAAGCAGCAGCACTTCTTCAAGTCCGCTATGCCCGAAGGCTACGTCCAGGAGCGCACCATCTTCTTCAAGGACGAC  
GGCAACTACAAGACCCGCGCCGAGGTGAAGTTCGAGGGCGACACCCTGGTGAACCGCATCGAGCTGAAGGGCATCGACTTC  
AAGGAGGACGGCAACATCCTGGGGCACAAGCTGGAGTACAACCTACAACAGCCACTAGGTTCTATATCATGGCCGACAAGCA  
GAAGAACGGCATCAAGGTGAACCTCAAGATCCGCCACAACATCGAGGACGGCAGCGTGCAGCTGCGCGACCACTACCAGCA  
GAACACCCCATCGGCGACGGCCCCGTGCTGCTGCCGACAACCCTACCTGAGCACCCAGTCCGCGCTGAGCAAAGACCC  
CAACGAGAAGCGCGATCACATGGTCTGCTGGAGTTCGTGACCGCCGCGGGATCACTCTCGGCATGGACGAGCTGACAA  
GTAA GAATTACTCCTCAGGTGCAGGCTGCCTATCAGAAGGTGGTGGCTGGTGTGGCAATGCCCTGGCTCACAATACTACTG  
AGATCTTTTCCCTCTGCCAAAATATGGGGACATCATGAAGCCCTTGGATCTGACTTCTGGCTAATAAAGGAAATTTATTT  
TCATTGCAATAGTGTGTTGGAATTTTTGTGTCTCTCACTCGGAAGGACATATGGGAGGGGTGACAATCAACCTCTGGATTACA  
AAATTTGTGAAAGATTGACTGGTATTCTTAACTATGTTGCTCCTTTTACGCTATGTGGATACGCTGCTTAAATGCCTTTGTATCATG  
CGTTAACTAACTTGTATTGACGCTTAAATGGTTACAATAAAGCAATAGCATCACAATTTACAATAAAGCAATTTTTTTTAC  
TGCATTCTAGTTGTGGTTTGTCCAACTCATCAATGTATCTTATCATGTCTGGAATTGACTCAAATGATGTCAATTAGTCTATCAGA  
AGCTATCTGGTCTCCCTCCGGGGGACAAGACATCCCTGTTAATATTTAACAGCAGTGTCCCAAAGTGGTCTTATATCCCT  
TGCTCTGGTCAACCAGTTGCAGGGTTTCTGTCTCACAGGAACGAAGTCCCTAAAGAAACAGTGGCAGCCAGGTTTAGCCCC  
GGAATTGACTGGATTCCTTTTTAGGGCCATTGGTATGGCTTTTTCCCCGTATCCCCCAGGTGTCTGCAGGCTCAAAGAGCAG  
CGAGAAGCGTTTCAGAGGAAAGCGATCCCGTGCACCTTCCCCGTGCCGGGCTGTCCCGCACGCTGCCGCTCGGGATGC  
GGGGAGCGCCGAGCCGAGCGGAGCCCGGGCTCGCTGCCCTAGCCCCAGCGGAGGACGTAATTAATCCCTG  
GGGGCTTTGGGGGGGGGCTGTCCCTGATATCTATAACAAGAAAATATATATAATAAGTTATCACGTAAGTAGAACATGAAATAA  
CAATATAATTATCGTATGAGTTAAATCTTAAAAGTACGTAAGATAATCATGCGTCAATTTGACTCACGCGGTGTTATAGTTCA  
AAATCAGTGACACTTACCGCATTGACAAGCAGCCCTACGCGGAGCTCAAGCGGGGACTGAGATGTCTAAATGCACAGCGCAG  
GATTCGCGCTATTTAGAAAAGAGAGCAATATTTCAAGAATGCATGCTCAATTTTACGACAGACTATCTTTCTAGGGTTAATCTAG  
CTGCATCAGGATCATATCGTGGTCTTTTTTCCGGTCTCAGTCTGCCCCAAGCTGGCGCTACTGGGCATCGGGAGGAAGAA  
GCCCCGTGCTTTTCCCGCAGGTTGAAGCGGCATGGAAAGAGTTTGGCGAGGATGACTGCTGCTGCATTGACGTTGAGCGAAA  
ACGCACGTTTACCATGATGATTCGGGAAGGTGTGGCCATGCACGCTTAAACGGTGAAGTTCGTTACAGCCACTGGGATAC





ACGCACGTTTACCATGATGATTTCGGGAAGGTGTGGCCATGCACGCCCTTTAACGGTGAAGTGTTCGTTTCAGGCCACCTGGGATAC  
 CAGTTCGTCGCGGCTTTTCCGGACACAGTTCGGATGGTCAGCCCGAAGCGCATCAGCAACCCGAACAATACCGGCGACAGCC  
 GGAAGTGCCTGCGGGTGTGCAGATTAATGACAGCGGTGCGGCGCTGGGATATTACGTCAGCGAGGACGGGTATCCTGGCTG  
 GATGCCGCAGAAATGGACATGGATACCCCGTGAGTTACCCGGCGGGCGCGCTTGGCGTAATCATGGTCATAGCTGTTTCCTGT  
 GTGAAATTGTTATCCGCTCACAATCCACACAACATACGAGCCGGAAGCATAAAGTGTAAAGCCTGGGGTGCCTAATGAGTGAG  
 CTAATCACAATTAATTGCGTTGCGCTCACTGCCCGCTTCCAGTCCGGAAACCTGTCGTGCCAGCTGCATTAATGAATCGGCCAA  
 CGCGCGGGGAGAGGCGGTTTTCGATTGGCGCTCTCCGCTTCCTCGTCACTGACTCGTGCCTCGGTCGTTCCGGCTGCG  
 GCGAGCGGTATCAGCTCACTCAAAGCGGTAATACGTTATCCACAGAATCAGGGGATAACGCAGGAAAGAACATGTGAGCAAA  
 AGGCCAGCAAAAGGCCAGGAACCGTAAAAAGGCCGCGTTGCTGGCGTTTTTCCATAGGCTCCGCCCCCTGACGAGCATCACA  
 AAAATCGACGCTCAAGTCAGAGGTGGCGAAACCCGACAGGACTATAAAGATACCAGGCGTTTCCCCCTGGAAGCTCCCTCGTGC  
 GCTCTCCTGTTCCGACCCCTGCCGCTTACCGGATACCTGTCCGCTTTCTCCCTTCGGGAAGCGTGGCGCTTTCTCATAGCTCAC  
 GCTGTAGGTATCTCAGTTCGGTGTAGGTGCTTCGCTCCAAGCTGGGCTGTGTGCACGAACCCCCGTTACGCCGACCCGCTGC  
 GCCTTATCCGGTAACTATCGTCTTGTAGTCCAACCCGGTAAGACACGACTTATCGCCACTGGCAGCAGCCACTGGTAACAGGATT  
 AGCAGAGCGAGGTATGTAGGCGGTGCTACAGAGTTCTTGAAGTGGTGGCTAACTACGGCTACACTAGAAGGACAGTATTTGGT  
 ATCTGCGCTCTGCTGAAGCCAGTTACCTTCGAAAAAGAGTTGGTAGCTCTTGATCCGGCAAAACAAACCACCGCTGGTAGCGGT  
 GGTTTTTTTGTGCAAGCAGCAGATTACGCGCAGAAAAAAGGATCTCAAGAAGATCCTTTGATCTTTTCTACGGGGTCTGACG  
 CTCAGTGAACGAAAACCTCACGTTAAGGGATTTTGGTCATGAGATTATCAAAAAGGATCTTCACCTAGATCCTTTTAAATTAATAA  
 GAAGTTTAAATCAATCTAAAGTATATGAGTAAACTTGGTCTGACAGTTACCAATGCTTAATCAGTGAGGCACCTATCTCAGCG  
 ATCTGTCTATTTTCGTTTCATCCATAGTTGCCGACTCCCGCTGCTGTAGATAACTACGATACGGGAGGGCTTACCATCTGGCCCCA  
 GTGCTGCAATGATACCGCGAGACCCACGCTCACCGGCTCCAGATTTATCAGCAATAAACAGCCAGCCGGAAGGGCCGAGCGC  
 AGAAGTGGTCTGCAACTTTTACCGCTCCATCCAGTCTATTAATTGTTGCCGGGAAGCTAGAGTAAGTAGTTCGCCAGTTAATA  
 GTTTGCGCAACGTTGTTGCCATTGCTACAGGCATCGTGGTGTACGCTCGTCTTTGGTATGGCTTATTAGCTCCGGTTCCCA  
 ACGATCAAGGCGAGTTACATGATCCCCATGTTGTGCAAAAAAGCGTTAGCTCCTTCGGTCTCCGATCGTTGTGAGAAGTAAG  
 TTGGCCGAGTGTATCACTCATGGTTATGGCAGCACTGCATAATTTCTTACTGTGCATGCCATCCGTAAGATGCCATTTCTGTGAC  
 TGGTGAAGTACTCAACCAAGTCATTCTGAGAATAGTGTATGCGGGCAGCGAGTTGCTCTTGGCCGCGTCAATACGGGATAATAC  
 CGCGCCACATAGCAGAACCTTTAAAGTGCTCATATTGAAAACGTTCTTCGGGGCGAAAACCTCTCAAGGATCTTACCGCTGTTG  
 AGATCCAGTTCGATGTAACCCACTCGTGCACCCAACTGATCTTCAGCATCTTTTACTTTTACCAGCGTTTTCTGGGTGAGCAAAAA  
 CAGGAAGGCCAAAATGCCGCAAAAAAGGGAATAAGGGCGACACGGAAATGTTGAATACTCAT

2.2.11 Vector 64: Pyl tRNA<sub>UCCU</sub> PylRS mCherry-P2A-eGFP(150AGGA)

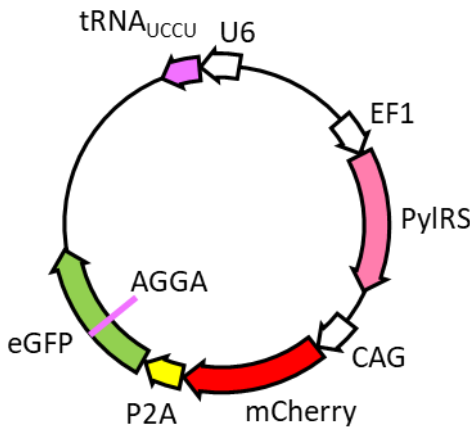

ACTCTTCCTTTTTCAATATTATTGAAGCATTATCAGGGTTATTGTCTCATGAGCGGATACATATTTGAATGTATTTAGAAAAATAAA  
 CAAATAGGGGTTCCGCGCACATTTCCCGGAAAAGTGCCACCTAAATTGTAAGCGTTAATATTTTGTAAAATTCGCGTTAAATTTTT  
 GTTAAATCAGTCAATTTTTAACCAATAGGCCAAAATCGGCAAAATCCCTATAAATCAAAGAATAGACCCAGATAGGGTTGAGT  
 GTTGTCCAGTTTGAACAAGAGTCCACTATTAAGAACGTGGACTCCAACGTCAAAGGGCGAAAAACCGTCTATCAGGGCGAT  
 GGCCCACTACGTGAACCATCACCTAATCAAGTTTTTTGGGGTCGAGGTGCCGTAAGCACTAAATCGGAACCCTAAAGGGAGC  
 CCCCATTAGAGCTTGACGGGGAAAGCCGGCGAACGTGGCGAGAAAGGAAGGGAAGAAAGCGAAAGGAGCGGGCGCTAGGG  
 CGCTGGCAAGTGTAGCGGTCACGCTGCGGTAACCACCACACCCGCCGCGCTTAATGCGCCGCTACAGGGCGCGTCCCATT  
 GCCATTAGGCTGCGCAACTGTTGGGAAGGGCGATCGGTGCGGGCCTCTTCGCTATTACGCCAGCTGGCGAAAGGGGATGT  
 GCTGCAAGGCGATTAAGTTGGGTAACGCCAGGTTTTCCAGTCACGACGTTGTAACCGACGCGCCAGTGAGCGCGCCTCGTT  
 CATTACGTTTTTTGAACCCGTGGAGGACGGGCAGACTCGCGGTGCAAAATGTGTTTTACAGCGTGATGGAGCAGATGAAGATGCT  
 CGACACGCTGCAGAACACGCAGCTAGATTAACCCTAGAAAGATAATCATATTGTGACGTACGTTAAAGATAATCATGCGTAAAAT  
 GACGCATGTGTTTTATCGTCTGTATATCGAGGTTTTATTAATTTGAATAGATATTAAGTTTTATATTTTACACTTACATACTA  
 ATAATAAATCAACAAAATTTATGTTTTATTTATTTAAAAAACAAAACCTAAATTTCTTATAAAGTAAACAAAACCT  
 TTATGAGGGACAGCCCCCCCCAAAGCCCCAGGAGTGAATTACGTCCTCCCCGCTAGGGGGCAGCAGCGAGCCGCCCG  
 GGGCTCCGCTCCGGTCCGGCGCTCCCCCGCATCCCCGAGCCGGCAGCGTGCGGGGACAGCCGGGCAGGGGAAGGTGG  
 CACGGGATCGTTTTCTCTGAACGCTTCTCGCTGCTTTGAGCCTGCAGACACCTGGGGGATACGGGAAAAGGCCATAAAAA  
 CCGCACTTGTCCGAAACCCCGGGAATCTAACCCGGCTGAACGGATTAGGAAGTCCATTGATCTACATGATCAGGTTCCG  
 GTGTTTCGTCCTTTCCACAAGATATAAAGCCAAGAATCGAAACTTTCAAGTTACGGTAAGCATATGATAGTCCATTTTAA  
 CATAATTTAAAATGCAACTACCAAGAAATTTACTTTTACGTCAGTATTTTGTACTAATATCTTTGTGTTTACAGTCAA  
 TAATTTCTAATATCTCTCTAACAGCCTTGATCGTATATGCAAAATGAAGGAATCATGGGAAATAGCCCCCTTCTGCCCCAAC  
 GGTTGCGATCGCTCCGGTGCCGTCAGTGGGCAGAGCGCACATCGCCACAGTCCCCGAGAAGTTGGGGGAGGGGTCCGCA  
 ATTGAACGGGTGCTAGAGAAGGTGGCGCGGGGTAAACTGGGAAAGTGATGTCGTGACTGGCTCCGCTTTTTCCCGAGGGT  
 GGGGGAGAACCGTATATAAGTGCAGTAGTCCCGTGAACGTTCTTTTTCGCAACGGGTTTCCCGCCAGAACACAGCTGAAGCTT  
 CGAGGGGCTGCATCTCTTCCAGCGCCCGCCCTACCTGAGGCCGCTCCACGCGGTTGAGTGCCTTCTGCCG  
 CTCCCGCTGTGGTGCCTCCTGAAGTGCCTCCGCGCTAGTAAAGTTTAAAGCTCAGGTCGAGACCGGCTTTGTCCGCG  
 CTCCCTGGAGCCTACCTAGACTCAGCCGGCTCTCCAGCTTTGCTGACCCTGCTGCTCAACTCTACGCTTTTGTTCGTTTT

CTGTTCTGCGCCGTTACAGATCCAAGCTGTGACCGGCGCCTACTCTACAGATAGCGTTAAACTTACGTTGCCACCATGGCTA  
CGACTACAAGGACGACGACGACAAGGACAAGAAGCCCCTGAACACCCTGATCAGCGCCACAGGACTGTGGATGCCAGAA  
CCGGCACCATCCACAAGATCAAGCACCACGAGGTGTCCCGGTCCAAAATCTACATCGAGATGGCCTCGGGGATCACCTGGT  
CGTCAACAACAGCAGAAGCAGCCGGACAGCCAGAGCCCTGCGGCACCACAAGTACAGAAAAGACCTGCAAGCGGTGCAGAG  
TGTCGACGAGGACCTGAACAAGTTCCTGACCAAGGCCAAGGACCAGACCAGCGTGAAGTGAAGGTGGTGTCCGCC  
CCACCCGGACCAAGAAAGCCATGCCAAGAGCGTGGCCAGAGCCCCAAGCCCCTGGAAAACACCGAAGCCGCTCAGGCC  
AGCCCTCAGCGGACGAAAGTTCAGCCCGCCATCCCCGTGTCTACCCAGGAAAGCGTCAGCGTCCCCGCCAGCGTGTCCACC  
AGCATCTAGCATCTCAACCGGCGCCACAGCTTCTGCCCTGGTCAAGGGCAACACCAACCCCATCACCAGCATGTCTGCC  
CTGTGCAAGCCTCTGCCCCAGCCCTGACCAAGTCCCAGACCAGCGGCTGGAAGTGTCTCTGAACCCCAAGGACGAGATCA  
GCCTGAACAGCGGCAAGCCCTCCGGGAGCTGGAAAGCGAGCTGCTGAGCCGGCGGAAGAAGGACCTCCAGCAATCTACG  
CCGAGGAACGGGAGAAGTACCTGGGCAAGCTGGAAAGGAGATACCCCGGTTCTTCTGTGGACCGGGGCTTCTGGAAATCA  
AGAGCCCCACTCTGCTCCCTGGAGTACATCGAGCGGATGGGCATGCAACAACGACCCGAGCTGAGCAAGCAGATTTCCG  
GGTGGAACAAGAATCTGCTCGCGCCATGTGGCCCCAACCTGTACAACACTACCTGCGGACCTGAGTGCAGCTCGCTGCC  
GACCCCATCAAGATTTTCGAGATCGGCCCTGCTACCGGAAAGAGAGCGACGGCAAGAGCACCTGGAAGAGTTTACAATGC  
TGAACTTTTGCCAGATGGGACGCGCTGCACCAGAGAGAACCTGGAATCCATCATCACCAGCTTTCTGAACCACCTGGGGAT  
CGACTTCAAGATCGTGGGCGACAGCTGCATGGTGTACGGCGACACCCTGGACGTGATGCACGGCGACCTGGAAGTGTCTAG  
CGCGCTGTGGGACCCATCCCTGTGACCAGCGGAGTGGGGCATGATAAGCCCTGGATCGGAGCCGGCTTCCGCTGGAAAC  
CCTGTGATGATAAGGATCCACTAGTCCAGTGGTGGAAATTGACATTGATTATTGACTAGTTATTAATAGTAATCAATTACGGGGT  
CATTAGTTCATAGCCCATATATGGAGTTCGCGGTTACATAAATTACGGTAAATGGCCCGCCTGGCTGACCGCCCAACGACCCCC  
GCCATTGACGTCAATAATGACGTATGTTCCCATAGTAACGCCAATAGGGACTTTCCATTGACGTCAATGGGTGGAGTATTTACG  
GTAAACTGCCCACTGGCAGTACATCAAGTGTATCATATGCCAAGTACGCCCTTATTGACGTCAATGACGGTAAATGGCCCGC  
TGGCATTATGCCAGTACATGACCTTATGGGACTTCTACTTGGCAGTGGCAGTACATACGTATTAGTCATGCTATTACATGGTCCGA  
GGTGAGCCCCACGTTCTGCTTCACTTCCCCACTCCCCCTCCCCACCCCAATTTTGTATTTTAAATTTTAAATTTTGG  
TGCAGCGATGGGGGCGGGGGGGGGGGGGGGCGCGCCAGCGGGGCGGGGCGGGGCGAGGGGCGGGGCGGGGCGAGGGC  
GGAGAGGTGCGGCGGACCAATCAGAGCGGCGCGCTCCGAAAGTTCCTTTTATGGCGAGGCGGCGGCGGCGGCGGCCCT  
ATAAAAAGCGAAGCGCGCGCGGGGCGGGAGTCTGCTGCTTCCGCCCCGTGCCCGCTCCGCGCCGCTCGCGCCGCC  
CGCCCCGGCTCTGACTGACCGCGTTACTCCCACAGGTGAGCGGGGCGGGACCGCCCTTCTCCTCCGGGCTGTAATTAGCGCTT  
GTTTAAATGACGGCTCGTTTCTTTCTGTGGCTCGTGAAGCCCTTAAAGGGCTCCGGGAGGGCCCTTTGTGCGGGGGGAGCG  
GCTCGGGGGGTGCGTGCCTGTGTGTGCTGCGGAGCGCCCGTGCGGCCCGCGCTGCCCGCGGGTGTGAGCGCTGCG  
GGCGCGGCGGGGCTTTGTGCGCTCCGCGTGTGCGCGAGGGGAGCGCGGCGGGGCGGTGCCCGCGGTGCGGGGGG  
GCTGCGAGGGGAACAAAGGCTGCGTCCGGGGTGTGTGCGTGGGGGGGTGAGCAGGGGGTGTGGCGCGGCGGTGCGGCTG  
TAAACCCCCCTGCACCCCTCCCCGAGTGTGCTGAGCAGCCCGCGCTTCCGGTGCGGGGCTCCGTACGGGCGGTGGCG  
GGGCTCGCGGTGCCGGGCGGGGGTGGCGAGTGGGGTGGCGGGGCGGGGCGGGGCGGGGCGGGGCGGGGAGGG  
CTCGGGGGAGCGCGCGGCCCGGAGCGCCGCGGCTGTGAGGCGCGGAGCCGAGCCGAGCCATTGCCTTTTATGGTA  
ATCGTGCAGAGGGGCGCAGGGACTTCTTTGTCCAAATCTGTGCGGAGCCGAAATCTGGGAGGCGCCGCGCACCCCTCTA  
GCGGGCGCGGGGCGAAGCGGTGCGGCGCCGGCAGGAAGGAAATGGGCGGGGAGGGCTTCTGTCGTGCGCGCGCCGCT  
CCCCTTCTCCCTCCAGCCTCGGGGCTGTCCGCGGGGAGCGGCTGCCCTCCGGGGGAGCGGGGCGGGGCGGGGTTCCGG  
TCTGCGGTGACCGCGGCTTAGAGCCTCTGCTAACCATTTTCATGCCCTTCTTTTCTACAGCTCCTGGGCAACGTGTC  
TGGTATTGTGCTGTCTCATCATTGGCAAAGAATTCGCCACCATGGTGAGCAAGGGCGAGGATAACATGGCCATCATCA  
AGGAGTTCATGCGCTTCAAGGTGCACATGGAGGGCTCCGTGAACGGCCACGAGTTCGAGATCGAGGGCGAGGGCGAGGGCC  
GCCCTACGAGGGCACCCAGACCGCCAAGCTGAAGGTGACCAAGGTGGCCCCCTGCCCTTCCCTGGGACATCCTGTCC  
CTCAGTTCATGTACGGCTCAAGGCCTACGTGAAGCACC CGCCGACATCCCCGACTACTTGAAGCTGTCTTCCCCGAGGG  
CTTCAAGTGGAGCGCGTATGAACTTCGAGGACGGCGGGTGGTACCCTGACCCAGGACTCCTCCTGCGAGGACGGGA  
GTTACTACAAGGTGAAGTGCAGCGCACCAACTTCCCTCCGAGCCCGTAATGCAGAAGAAGACCATGGGCTGGCG  
GGCCTCCTCCGAGCGGATGTACCCGAGGACGGCGCCCTGAAGGGCGAGATCAAGCAGAGGCTGAAGCTGAAGGACGGCG  
GCCACTACGACGCTGAGGTCAAGACCACCTACAAGGCCAAGAAGCCCGTGCAGCTGCCCGGCGCCTACAACGTCAACATCA  
AGTTGGACATCACTCCACAACGAGGACTACACCATCGTGAACAGTACGAACCGCGCCGAGGGCGCCACTCCACCGGCG  
GCATGGACGAGTGTACGCGTCTGGAGGCGCCACCAATTTACCGCTGTGAAACAGGCTGGCGACGTGGAAGAGAACCCTG  
YACCTGGACAAAAGTTCGGTAGCAAGGGCGAGGAGCTTCCACCGGGTGGTCCCATCCTGGTCCGAGCTGGACGGCGACG  
TAAACGGCCACAAGTTACGCTGTCCGGCGAGGGCGAGGCGATGCCACCTACGGCAAGCTGACCTGAAAGTTCATCTGCA  
CCACCGGCAAGCTGCCCGTCCCTGGCCACCCCTGCTGACCACCCTGACCTACGGCGTGCAGTGTTCAGCCGCTACCCCGA  
CCACATGAAGCAGCAGACTTCTTCAAGTCCGCCATGCCGAAGGCTACGTCCAGGAGCGCACCATCTTCTTCAAGGACGAC  
GGCAACTACAAGACCCGCGCCGAGGTGAAGTTCGAGGGCGACACCCTGGTGAACCCGATCGAGCTGAAGGGCATCGACTTC  
AAGGAGGACGGCAACATCCTGGGGCACAAGCTGGAGTACAACACTACAACAGCCACAGGAGTCTATATCATGGCCGACAAGCA  
GAAGAACGGCATCAAGGTGAACCTCAAGATCCGCCACAACATCGAGGACGCGAGCGTGCAGCTGCGGACCACTACCAGCA  
GAACACCCCATCGGCGACGGCCCGTGTGCTGCCGACAACCACTACCTGAGCACCCAGTCCGCCCTGAGCAAAGACCC  
CAACGAGAAGCGGATCACATGTTCTGCTGGAGTTCGTGACCGCCGCGGGATCACTCTGGCATGGACGAGCTGTACAA  
GTAAGAATCACTCCTCAGGTGCAGGCTGCCTATCAGAAGGTGGTGGCTGGTGTGGCAATGCCCTGGCTCACAATAACCACTG  
AGATCTTTTTCCCTCTGCCAAAATTTATGGGGACATCATGAAGCCCTTGAAGTCTGACTTCTGGCTAATAAAGGAAATTTATTT  
TCATTGCAATAGTGTGTTGGAATTTTTGTGCTCTCACTCGGAAGGACATATGGGAGGGGTGCACAATCAACCTCGGATTACA  
AAATTTGTGAAAGATTGACTGGTATTCTTAACTATGTTGCTCCTTTTACGCTATGTGGATACGCTGCTTAAATGCCTTTGTATCATG  
CGTAACTAAACTTGTATTGTCAGCTTATAATGGTTACAATAAAGCAATAGCATCACAATAATTTACAATAAAGCATTTTTTTTAC  
TGCATTCTAGTTGTGGTTTGTCCAAACTCATCAATGTATCTTATCATGTCTGGAATTGACTCAATGATGTCAATTAGTCTATCAGA  
AGTATCTGGTCTCCCTCCGGGGGACAAGACATCCCTGTTAATATTTAAACAGCAGTGTCCCAAACCTGGGTTCTTATATCCCT  
TGCTCTGGTCAACCAGTTCAGGGTTTCCCTGTCTCACAGGACGAAGTCCCTAAAGAAACAGTGGCAGCCAGTGTATGCC  
GGAATTGACTGGATTTTATAGGCCATTGGTATGCTTTTTCCCGTATCCCCCGAGTGTGCGAGCTTCCCGGATCAAGGAGCAG  
CGAGAAGCGTTCAGAGGAAAGCGATCCCGTGCACCTTCCCGTGCCTGGGCTGTCCCGCACGCTGCCGGCTCGGGGATGC  
GGGGGAGCGCCGGACCGGAGCGGAGCCCGGGCGGCTCGCTGCTGCCCCCTAGCGGGGGAGGGACGTAATTACATCCCTG  
GGGGCTTTGGGGGGGGGCTGTCCCTGATATCTATAACAAGAAAATATATATAATAAGTTATCACGTAAGTAGAACATGAAATAA  
CAATATAATTATCGTATGAGTTAAATCTTAAAAGTCAAGTAAAAGATAATCATGCGTCAATTTGACTCACCGCGGTGTTATAGTTCA  
AAATCAGTGACACTTACCGAATTGACAAGCACGCTCACGGGAGCTCCAAGCGGCGACTGAGATGTCTTAAATGCAGGACGACG  
GATTCGCGCTATTTAGAAAAGAGAGCAATATTTCAAGAATGCATGCGTCAATTTTACGCAGACTATCTTTCTAGGGTTAATCTAG  
CTGCATCAGGATCATATCGTCCGGTCTTTTTCCGGCTCAGTCACTGCCCAAGCTGGCGCTATCTGGGCATCGGGGAGGAAGAA

GCCCGTGCCCTTTCCCGCGAGGTTGAAGCGGCATGGAAAGAGTTTGCCGAGGATGACTGCTGCTGCATTGACGTTGAGCGAAA  
 ACGCACGTTTACCATGATGATTTCGGGAAGGTGTGGCCATGCACGCCTTTAACGGTGAAGTGTTCGTTACAGCCACCTGGGATAC  
 CAGTTCGTCGCGCTTTTCCGGACACAGTTCGGATGGTCAGCCGAAGCGCATCAGCAACCCGAACAATACCGGCGACAGCC  
 GGAAGTCCCGTGCCGGTGTGCAGATTAATGACAGCGGTGCGGCGCTGGGATATTACGTCAGCGAGGACGGGTATCCTGGCTG  
 GATGCCGCAGAAATGGACATGGATACCCCGTGAGTTACCCGGCGGGCGCGCTTGGCGTAATCATGGTCATAGCTGTTTCCTGT  
 GTGAAATTGTTATCCGCTCACAATCCACACAACATACGAGCCGGAAGCATAAAGTGTAAAGCCTGGGGTGCCTAATGAGTGA  
 CTAATCACATTAATTGCGTTGCGTCACTGCCCGCTTTCCAGTCGGGAAACCTGTGCTGCCAGCTGCATTAATGAATCGGCCAA  
 CGCGCGGGGAGAGGCGGTTTGCATTTGGGCGCTCTCCGCTTCCCTCGTCACTGACTCGCTCGGCTCGGTCGTTCCGGCTGCG  
 GCGAGCGGTATCAGCTCACTCAAAGGCGGTAATACGTTATCCACAGAATCAGGGGATAACGCAGGAAAGAACATGTGAGCAA  
 AGGCCAGCAAAAGGCCAGGAACCGTAAAAAGGCCGCGTGTGCTGGCGTTTTTCCATAGGCTCCGCCCCCTGACGAGCATACA  
 AAAATCGACGCTCAAGTCAGAGGTGGCGAAACCCGACAGGACTATAAAGATACCAGGCGTTTTCCCCCTGGAAGCTCCCTCGTGC  
 GCTCTCCTGTTCCGACCCTGCCGCTTACCGGATACCTGTCCGCTTTCTCCCTCGGGAAGCGTGGCGCTTTCTCATAGCTCAC  
 GCTGATGGTATCTCAGTTCGGTGTAGGTGCTCCGCTCAAAGCTGGGCTGTGTGCACGAACCCCGTTTCCAGCCGACCGCTGC  
 GCCTTATCCGGTAACTATCGTCTTGAGTCCAACCCGGTAAGACACGACTTATCGCCACTGGCAGCAGCCACTGGTAACAGGATT  
 AGCAGAGCGAGGTATGTAGGCGGTGCTACAGAGTTCTTGAAGTGGTGGCCTAACTACGGCTACACTAGAAGGACAGTATTTGGT  
 ATCTGCGCTCTGCTGAAGCCAGTTACCTTCGGAAAAAGAGTTGGTAGCTCTTGATCCGGCAAACAACCACCGCTGGTAGCGGT  
 GGTTTTTTTGTTTGAAGCAGCAGATTACGCGCAGAAAAAAGGATCTCAAGAAGATCCTTTGATCTTTTCTACGGGGTCTGACG  
 CTCAGTGAACGAAAACCTACGTTAAGGGATTTTGGTCATGAGATTATCAAAAAGGATCTTACCTAGATCCTTTTAAATTAATAA  
 GAAGTTTTAAATCAATCTAAAGTATATGAGTAAACTTTGGTCTGACAGTTACCAATGCTTAATCAGTGAGGCACCTATCTCAGCG  
 ATCTGTCTATTTTCGTTTATCCATAGTTGCCTGACTCCCGCTCGTGTAGATAACTACGATACGGGAGGGCTTACCATCTGGCCCA  
 GTGCTGCAATGATACCGCGAGACCCACGCTCACCGGCTCCAGATTTATCAGCAATAAACAGCCAGCCGGAAGGGCCGAGCGC  
 AGAAGTGGTCTGCAACTTTATCCGCTCCATCCAGTCTATTAATTGTTGCCGGGAAGCTAGAGTAAGTAGTTCGCCAGTTAATA  
 GTTTGCGCAACGTTGTTGCCATTGCTACAGGCATCGTGGTGTACGCTCGTCTTGGTATGGCTTATTAGCTCCGGTTCCTTCCCA  
 ACGTAAAGGCGAGTTACATGATCCCCATGTTTGGCAAAAAAGCGGTTAGCTCCTTCGGTCTCCGATCGTTGTGCAAGTAAG  
 TTGGCCGAGTGTATCACTCATGGTTATGGCAGCACTGCATAATTCTTACTGTATGCCATCCGTAAGATGCTTTTCTGTGAC  
 TGGTGAAGTCAACCAAGTCATTCTGAGAATAGTGTATGCGGCGACCGAGTTGCTCTTGGCCGCGTCAATACGGGATAATAC  
 CGCGCCACATAGCAGAAGTTTAAAGTGCTCATATTGAAAAACGTTCTTCGGGGCGAAAACTCTCAAGGATCTTACCGCTGTTG  
 AGATCCAGTTCGATGTAACCCACTCGTGCACCCAACTGATCTTCAGCATCTTTACTTTTACCAGCGTTTCTGGGTGAGCAAAAA  
 CAGGAAGGCAAAATGCCGCAAAAAAGGGAATAAGGGCGACACGGAAATGTTGAATACTCAT

2.2.12 Vector 65: Pyl tRNA<sub>UCCU(Ev1)</sub> PylIRS mCherry-P2A-eGFP(150AGGA)

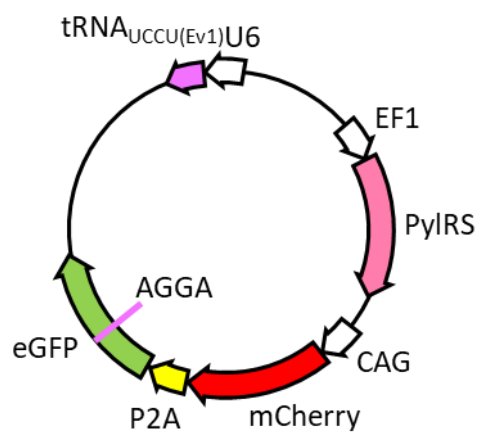

ACTCTTCCCTTTTCAATATTATGAAGCATTATCAGGGTTATTGTCTCATGAGCGGATACATATTTGAATGTATTTAGAAAAATAA  
 CAAATAGGGGTTCCGCGCACATTTCCCGAAAAGTGCCACCTAAATTTGAAGCGTAAATTTTTGTTAAAATTCGCGTTAAATTTTT  
 GTTAAATCAGCTCATTTTTTAAACCAATAGGCCGAAATCGGCAAAATCCCTTATAAATCAAAAGAATAGACCGAGATAGGGTTGAGT  
 GTTGTCCAGTTTGAACAAGAGTCCACTATTAAGAACGTGGACTCCAACGTCAAAGGGCGAAAAACCGTCTATCAGGGCGAT  
 GGCCACTACGTGAACCATCACCTAATCAAGTTTTTTGGGGTTCGAGGTGCCGTAAGCACTAAATCGGAACCCCTAAAGGGAGC  
 CCCCAGTTTAGAGCTTGACGGGGAAAGCCGGCGAACGTGGCGAGAAAGGAAGGGAAAGAAAGCGAAAGGAGCGGGCGCTAGGG  
 CGCTGGCAAGTGTAGCGGTACGCTGCGCGTAACCACCACACCCGCCGCTTAATGCGCCGTACAGGGCGCGTCCCATTCC  
 GCCATTAGGCTGCGCAACTGTTGGGAAGGGCGATCGGTGCGGGCCTTTCGCTATTACGCCAGCTGGCGAAAAGGGGATGT  
 GCTGCAAGGCGATTAAGTTGGGTAACGCCAGGGTTTTCCAGTACGACGTTGTA AACGACGGCCAGTGAGCGCGCTCGTT  
 CATTACGTTTTTTGAACCCGTGGAGGACGGGCAGACTCGCGGTGCAAAATGTGTTTTACAGCGTGATGGAGCAGATGAAGATGCT  
 CGACAGCTGCAGAAACCGCATAGATTAACCCTAGAAAGATAATCATATTGTGACGTACGTTAAAGATAATCATGCGTAAAT  
 GACGATGTGTTTTATCGGCTGTATATCGAGGTTTTATTAATTTGAATAGATATTAAGTTTTATTATTTACACTTACATACTA  
 ATAATAAATCAACAACAATTTATTTATGTTTATTTATTTAATAAATAAATAAATAAATAAATAAATAAATAAATAAATAAATAA  
 TTAGAGGGACAGCCCCCCCCAAAGCCCCAGGGATGTAATTACGTCCCTCCCCCGTAGGGGGCAGCAGCGAGCCGCCCCG  
 GGGCTCCGCTCCGGTCCGGCGCTCCCCCGCATCCCCGAGCCGGCAGCGTGGGGGACAGCCGGGCACGGGGAAGGTGG  
 CACGGGATCGCTTCTCTGAACGCTTCTCGCTGCTTTGAGCCTGCAGACACCTGGGGGGATACGGGGAAAAGGCCATAAAAA  
 CCGCACTGTCCGGAAACCCGGGAATCAACCCGGCTGAACCTATTAGGAAGAGGATTTCGATCTACATGATCAGGTTCCG  
 GTGTTTCGCTTTCCAAAGATATAAAGCCAAGAAATCGAAATCTTTCAAGTTACGGTAAGCATATGATATCCATTTAAAA  
 CATAATTTTAAACTGCAAACCTACCCAAGAAATTTACTTTCTACGTCACGATTTTTGACTAATATCTTTGTGTTTACAGTCAA  
 TAATTTCTAATTATCTCTAACAGCCTTGATCGTATATGCAAAATATGAAGGAATCATGGGAAATAGGCCCTTTCCTGCCAAC  
 GGTTGCGATCGCTCCGGTGCCTGTCAGTGGGAGAGCGCACATCGCCACAGTCCCCGAGAAGTTGGGGGAGGGGTCCGGCA  
 ATTGAACGGGTGCCTAGAGAAGGTGGCGCGGGGTAAACTGGGAAAGTGATGTCGTGACTGGCTCCGCGCTTTTCCCGAGGGT  
 GGGGGAGAACCGTATAAAGTCAGTAGTCCGCGTGAACGTTCTTTTTCGCAACGGGTTTGGCCGAGAACACAGCTGAAGCTT  
 CGAGGGCTCGCATCTCTCTTACGCGCCCGCCCTACCTGAGGCGCCATCCACGCGGTTGAGTGCCTGCTGCGCTTCTGCGC  
 CTCCCGCTGTGGTGCCTCTGAACTGCGTCCGCGCTAGGTAAGTTAAAGCTCAGGTCGAGACCGGGCTTTGTCCGGCG

CTCCCTTGGAGCCTACCTAGACTCAGCCGGCTCTCCACGCTTTGCGCTGACCCTGCTTGCTCAACTCTACGTCTTTGTTTCGTTTT  
CTGTTCTGCGCCGTTACAGATCCAAGCTGTGACC GGCGCTACTCTACAGATAGCGTTTAAACTTACGCTTGCCACC**ATGGCTA**  
**GCGACTACAAGGACGACGACGACAAGGACAAGAAGCCCTGAACACCCTGATCAGCGCCACAGGACTGTGGATGTCCAGAA**  
**CCGGCACCATCCACAAGATCAAGCACCACGAGGTGTCCGGTCCAAAATCTACATCGAGATGGCTGCGGGCAGTACCTGGT**  
**CGTCAACAACAGCAGAAGCAGCCGACAGCCAGAGCCCTGCGGCACCACAAGTACAGAAAGACCTGCAAGCGGTGCAGAG**  
**TGTCCGACGAGGACCTGAACAAGTTCTGACCAAGGCCAACGAGGACAGACCAGCGTGAAAGTGAAGGTGGTGTCCGCC**  
**CCACCCGGACCAAGAAAGCCATGCCAAGAGCGTGGCCAGAGCCCCAACGCCCTGGAAAAACCCGAAGCCGCTCAGGCC**  
**CAGCCCAGCGGCAGCAAGTTACGCCCGCATCCCCGTGTCTACCCAGGAAAGCGTCAGCGTCCCCGACGCGTGTCCACC**  
**AGCATCTTAGCATCTCAACCGGCGCCACAGCTTCTGCCCTGGTCAAGGGCAACACCAACCCCATCACCAGCATGTCTGCC**  
**CTGTGCAAGCCTCTGCCCCAGCCCTGACCAAGTCCCAGACCGACCGGCTGGAAGTGTCTCTGAACCCCAAGGACGAGATCA**  
**GCCTGAACAGCGGCAAGCCCTTCCGGGAGCTGGAAGCGAGCTGCTGAGCCGGCGGAAGAAGGACCTCCAGCAAATCTACG**  
**CCGAGGAACGGGAGAATCTCTGGGCAAGCTGGAAGAGAGATCACCCGGTCTTCTGTGGACCGGGGCTCTCTGAAATCA**  
**AGAGCCCCATCTGATCCCCCTGGAGTACATCGAGCGGATGGGCATCGACAACGACACCGAGCTCGCAGCAGATGTTCCG**  
**GGTGGACAAGAACTTCTGCTGCGGCCATGCTGGCCCCAACCTGTACAACCTACCTGCGGAAACTGGATCGCGCTCTGCC**  
**GACCCCATCAAGATTTTCGAGATCGGCCCTGCTACCGGAAAGAGAGCGACGGCAAAGAGCACCTGGAAGAGTTACAATGC**  
**TGAACTTTTGCCAGATGGGCAGCGGCTGCACCAGAGAGAACCTGGAATCCATCATCACCGACTTTCTGAACCACCTGGGGAT**  
**CGACTTCAAGATCGTGGGCGACAGCTGCATGGTGTACGGCGACACCCTGGACGTGATGCACGGCGACTGGAACCTGTAG**  
**CGCCCTCGTGGGACCCATCCCTGACCCGGGAGTGGGCATGATAAGCCCTGGATCGGAGCCGCTTCCGCTGGAACG**  
**GCTGCTGAAAGTCAAGCACGACTTAAAGAACATCAAGCGGGCTGCAGAAGCGAGAGCTACTACAACCGCATCAGCAAA**  
**CCTGTGATGATAAGGATCCACTAGTCCAGTGTGGTGAATTGACATTGATTATTGACTAGTTATTAATAGTAATCAATTACGGGGT**  
CATTAGTTCATAGCCCATATATGGAGTTCGCGTTACATAACTTACGGTAAATGGCCCGCTGGCTGACCGCCCAACGACCCCC  
GCCATTGACGTCAATAATGACGTATGTTCCCATAGTAACGCCAATAGGGACTTCCATTGACGTCAATGGGTGGAGTATTTACG  
GTAACCTGCCACTTGGCAGTACATCAAGTGTATCATATGCCAAGTACGCCCTTATTGACGTCAATGACGGTAAATGGCCCGC  
TGGCATTATGCCAGTACATGACCTTATGGACTTTCTACTTGGCAGTACATCTACGTATTAGTCAATTACCATGTTCCGA  
GGTGAGCCCCACGTTCTGCTTACTCTCCCCATCTCCCCCCCCCTCCCCACCCCAATTTTGTATTTATTTATTTTAAATTTT  
TGCAGCGATGGGGGCGGGGGGGGGGGGGGGGGGGGGGGGGGGGGGGGGGGGGGGGGGGGGGGGGGGGGGGGGGGGGGGGG  
GGAGAGGTGCGGCGGCAGCCAATCAGAGCGGCGCGCTCCGAAAGTTTCTTTTATGGCGAGGCGGCGGCGGCGGCGGCGCC  
ATAAAAAGCGAAGCGCGCGGGGGGGGAGTGCCTGCGTTGCTTCCGCCCGTCCCGCTCCGCGCCGCTCCGCGCCCTCGCGCC  
CGCCCCGGCTCTGACTGACCGGTTACTCCACAGGTGAGCGGGCGGACGCCCCCTTCTCTCCGGCTTAATTAGCGCTTG  
GTTTAAATGACGGCTCGTTTCTTTCTGTGGCTGCGTGAAGCCCTAAAGGGCTCCGGGAGGGCCCTTTGTGCGGGGGGAGCG  
GCTCGGGGGGTGCGTGCCTGTGTGTGCTGGGAGCGCCGCTGCGGCCCGCGCTGCCCGCGGCTGTGAGCGCTGCG  
GGCGCGCGCGGGGCTTTGTGCGCTCCGCGTGTGCGCGAGGGGAGCGCGGCCGGGGCGGTGCCCGCGGTGCGGGGGG  
GCTGCGAGGGGAACAAGGCTGCGTGCCTGCTGCTGCTGGGGGGGTGAGCAGGGGGTGTGGCGCGGGCGGTGGGGCT  
TAACCCCCCTGCACCCCTCCCGAGTTGCTGAGCAGCGCCGCTTCCGGTCCGGGCTCCGATCGGCGCGGCGTCCGCGC  
GGGGCTCGCCGTGCCGGGGGGGGGGGGGGGGGGGGGGGGGGGGGGGGGGGGGGGGGGGGGGGGGGGGGGGGGGGGGGGG  
CTCGGGGGAGGGGGCGGGCGGCCCCCGGAGCGCGGGCGCTGTGAGGCGCGGGCGAGCCGACCCATTGCCTTTTATGGTA  
ATCGTGCAGAGGGGGCGAGGGACTTCCCTTTGTCCAAATCTGTGCGGAGCCGAAATCTGGGAGGCGCCGCGCACCCCTCTA  
GCGGGCGCGGGGCGAAGCGGTGCGCGCCCGGCAGGAAGGAAATGGGCGGGGAGGGCCCTTCTGCTGCGTCCGCGCGCCCGCT  
CCCCTTCCCTCCAGCCCTCGGGCTTCCCGGGGGGACGGCTGCCCTTCCGGGGGACGGGGCGGGGGGGGGTTCGGC  
TTCTGGCGTGTGACCGCGCTCTAGAGCTCTGTCAACCATGTTTCATGCGCTTCTTTTCTTCTTCTTCTTCTTCTTCTTCT  
TGTTATTGTGCTGTCTCATCATTTTGGCAAAGAATTCCGCCACC**ATGGTGAGCAAGGGCGAGGAGGATAACATGGCCATCATCA**  
**AGGAGTTCATGCGCTTCAAGGTGCACATGGAGGGCTCCGTGAACGGCCACGAGTTCGAGATCGAGGGCGAGGGCGAGGGCC**  
**GCCCCTACGAGGGCACCCAGACCGCCAAGCTGAAGGTGACCAAGGGTGGCCCCCTGCCCTTCGCTGGGACATCCTGTCC**  
**CTCAGTTCATGTACGGCTCAAGGCCTACGTGAAGCACCCCGCCGACATCCCCGACTACTTGAAGCTGCTCTCCCCGAGGG**  
**CTTCAAGTGGGAGCGGTGATGAACCTTCGAGGACGGCGGCTGGTACCCTGACCCAGGACTCTCCCTCGAGGACGGCGA**  
**GTTTCATCTACAAGGTGAAGCTGCGCGCACCAACTTCCCTCCGACGGCCCCGTAATGCAGAAGAAGACCATGGGCTGGGA**  
**GGCTCCTCCGAGCGGATGTACCCCGAGGACGGCGCCCTGAAGGGCGAGATCAAGCAGAGGCTGAAGCTGAAGGACGGCG**  
**GCCACTACGACGCTGAGTCAAGACCACCTACAAGGCCAAGAAGCCCGTGCAGCTGCCCGGCGCCTACAACGTCAACATCA**  
**AGTTGGACATCACCTCCACAACGAGGACTACACCATCGTGAACAGTACGAACGCGCCGAGGGCGCCACTCCACCCGGC**  
**GCATGGACGAGCTGACGCTGAGGCGGAGGCAACTTTCAGCCAAATTCAGCTGCTGTAACAGGCTGGCAGGAACCTC**  
**GACCTGGACA AAAAGTTCGTTGAGCAAGGGCGAGGAGCTTTCACCTGGGTGTTGCCATCTGTCGAGCTGGACGGCGACG**  
**TAAACGGCCACAAGTTCAGCGTGTCCGGCGAGGGCGAGGGCGATGCCACCTACGGCAAGCTGACCCTGAAGTTCATCTGCA**  
**CCACCGGCAAGCTGCCCGTGCCTGGCCACCCTCGTGACCACCTGACCTACGGCGTGCAGTGTTCAGCCGCTACCCCGA**  
**CCACATGAAGCAGCAGACTTCTTCAAGTCCGCCATGCCCGAAGGCTACGTCCAGGAGCGCACCATCTTCTTCAAGGACGAC**  
**GGCAACTACAAGACCCGCGCGAGGTGAAGTTCGAGGGCGACACCCTGGTGAACCGCATCGAGCTGAAGGGCATCGACTTC**  
**AAGGAGGACGCAACATCCTGGGGCACAAGCTGGAGTACAACCTACAACAGCCAC**AGGA**GTCCTATATCGCCGACAAGCA**  
**GAAGAACGGCATCAAGGTGAACCTCAAGATCCGCCACAACATCGAGGACGGCAGCGTGCAGCTGCGCGACCACTACCAGCA**  
**GAACACCCCATCGGCGACGGCCCCGTGCTGCTGCCCGACAACCCTACCTGAGCACCCAGTCCGCCCTGAGCAAAGACCC**  
**CAACGAGAAGCGCGATCACATGGTCTGCTGGAGTTCGTGACCGCCGCGGGGATCACTCTCGGCATGGACGAGCTGTACAA**  
**GTAAGAATTCACCTCCTCAGGTGCAGGCTGCCTATCAGAAGTGGTGGCTGGTGTGGCCAATGCCCTGGCTACAAAATCCACTG**  
AGATCTTTTTCCCTCTGCCAAAATATGGGGACATCATGAAGCCCTTGAAGCATCTGACTTCTGGCTAATAAAGGAAATTTATTT  
TCATTGCAATAGTGTGTTGGAATTTTTTGTGCTCTCACTCGGAAGGACATATGGGAGGGGTGACAATCAACCTCTGGATTACA  
AAATTTGTGAAAGATTGACTGGTATTCTTAACTATGTTGCTCCTTTTACGCTATGTGGATACGCTGCTTAAATGCCTTTGTATCATG  
CGTTAACTAACTTGTATTGACGCTTATAATGGTTACAAATAAAGCAATAGCATCACAAATTTACAAATAAAGCATTTTTTTAC  
TGCATTTAGTTGTGGTTTTGTCCAAACTCAATGATCTTATCATGTCTGGAATTGACTCAAATGATGTCAATTAGTCTATCAGA  
AGCTACTGTCTCCCTCCGGGGACAAGACATCCCTGTTAATATTTAAACAGCAGTGTCCCAAACCTGGGTTCTTATATCCCT  
TGCTCTGGTACCCAGGTTGAGGGTTTTCTGCTCCTCACAGGAACAGTCCCTAAAGAAACAGTGGCAGCCAGGTTTTAGCCCC  
GGAATTGACTGGATTCTTTTTTAGGGCCATTGGTATGGCTTTTTCCCCGATCCCCCAGGTGTCTGCAGGCTCAAAGAGCAG  
CGAGAAGCGTTTACAGAGAAAGCGATCCCGTGCACCTTCCCCGTGCCCGGGCTGTCCCCGCACGCTGCCGGCTCGGGGATGC  
GGGGGGAGCGCCGGACCGGAGCGGAGCCCGGGGGCTCGCTGCTGCCCCCTAGCGGGGGAGGGACGTAATTACATCCCTG  
GGGGCTTTGGGGGGGGGTGCTCCTGATATCTATAACAAGAAAATATATATAATAAGTTATCAGTAAAGTAAACATGAATAA  
CAATATAAATTATCGTATGAGTTAAATCTTAAAGTACACGTAAGAAATAATCATGCTCATTTTACTCACGCGGCTGTTATAGTTCA  
AAATCAGTGACACTTACCGCATTGACAAGCACGCTCACGGGAGCTCCAAGCGGCGACTGAGATGCTCTAAATGCACAGCGACG  
GATTCGCGCTATTTAGAAAAGAGAGCAATATTTCAAGAATGCATGCGTCAATTTACGCAGACTATCTTTCTAGGGTTAATCTAG



CTGCATCAGGATCATATCGTCCGGTCTTTTTCCGGCTCAGTCATCGCCCAAGCTGGCGCTATCTGGGCATCGGGGAGGAAGAA  
 GCCCGTGCCTTTTCCCGCAGAGTTGAAGCGGCATGGAAAGAGTTGCCGAGGATGACTGCTGCTGCATTGACGTTGAGCGAAA  
 ACGCACGTTTACCATGATGATTCCGGGAAGGTGTGGCCATGCACGCCTTTAACGGTGAAGTGTTCGTTTCAGGCCACCTGGGATAC  
 CAGTTCGTCGCGGCTTTTCCGGACACAGTTCGGGATGGTCAGCCCAAGCGCATCAGCAACCCGAACAATACCGGCGACAGCC  
 GGAAGTGCCTGCGGTTGTGCAGATTAATGACAGCGGTGCGGCGCTGGGATATTACGTCAGCGAGGACGGGTATCCTGGCTG  
 GATGCCGCAGAAATGGACATGGATACCCCGTGAGTTACCCGGCGGGCGCGCTTGGCGTAATCATGGTCATAGCTGTTTCCTGT  
 GTGAAATTGTTATCCGCTACAATTCACACAACATACGAGCCGAAGCATAAAGTGTAAAGCCTGGGGTGCCTAATGAGTGAG  
 CTAACCTCACATTAATTGCGTTGCGTCACTGCCGCTTTCCAGTCGGGAAACCTGTCGTGCCAGCTGCATTAATGAATCGGCCAA  
 CGCGCGGGGAGAGGCGGTTTTCGCTATTGGGCGCTTCCGCTTCCGCTCACTGACTCGCTGCGCTCGGTCGTTCCGGCTGCG  
 GCGAGCGGTATCAGCTCACTCAAAGGCGGTAATACGGTTATCCACAGAATCAGGGGATAACGCAGGAAAGAACATGTGAGCAAA  
 AGGCCAGCAAAAGGCCAGGAACCGTAAAAAGGCCGCGTTCGCTGGCGTTTTTCCATAGGCTCCGCCCCCTGACGAGCATCACA  
 AAAATCGACGCTCAAGTCAGAGGTGGCGAAACCCGACAGGACTATAAAGATACCAGGCGTTTTCCCCCTGGAAGCTCCCTCGTGC  
 GCTCCTCGTTCGACCCCTGCCGTTACCGGATACCTGTCCGCTTTCCCTTCGGGAAGCGTGGCGCTTTCATAGCTCAC  
 GCTGTAGGTATCTCAGTTCGGTGTAGTTCGTTCCGCTCCAAGCTGGGCTGTGTGCACGAACCCCGTTCAGCCCGACCGCTGC  
 GCCTTATCCGGTAACTATCGTCTTGAGTCCAACCCGGTAAGACAGCACTTATCGCCACTGGCAGCAGCCACTGGTAACAGGATT  
 AGCAGAGCGAGGTATGTAGGCGGTGCTACAGAGTTCTTGAAGTGGTGGCCTAACTACGGCTACACTAGAAGGACAGTATTTGGT  
 ATCTGCGCTCTGCTGAAGCCAGTTACCTTCGGAAAAAGAGTTGGTAGCTCTTGATCCGGCAAAACAAACCACCGCTGGTAGCGGT  
 GGTTTTTTTGTGCAAGCAGCAGATTACGCGCAGAAAAAAGGATCTCAAGAAGATCCTTTGATCTTTTACGGGGTCTGACG  
 CTCAGTGAACGAAAACACGTTAAGGGATTTTGGTATGAGATTATCAAAAAGGATCTTCACCTAGATCCTTTTAAATTAATAA  
 GAAGTTTTAAATCAATCTAAAGTATATATGAGTAAACTTGGTCTGACAGTTACCAATGCTTAATCAGTGAGGCACCTATCTCAGCG  
 ATCTGTCTATTTTCGTTTCATCCATAGTTGCCTGACTCCCGCTCGTGTAGATAACTACGATACGGGAGGGCTTACCATCTGGCCCA  
 GTGCTGCAATGATACCGCGAGACCCACGCTCACCGGCTCCAGATTTATCAGCAATAAACAGCCAGCCGGAAGGGCCGAGCGC  
 AGAAGTGGTCTGCAACTTTATCCGCTCCATCCAGTCTATTAATTGTTGCCGGAAGCTAGAGTAAGTAGTTCGCCAGTTAATA  
 GTTTCGCAACGTTGTTGCCATTGCTACAGGCATCGTGGTGCACGCTCGTCTTTGGTATGGCTTACCTCAGCTCCGTTCCCA  
 ACGATCAAGGCGAGTTACATGATCCCCATGTTGTGCAAAAAAGCGTTAGCTCCTTCGGTCTCCGATCGTTGTCAGAAGTAAG  
 TTGGCCGAGTGTATCACTCATGGTTATGGCAGCACTGCATAATTCTTACTGTATGCCATCCGTAAGATGCTTTTCTGTGAC  
 TGGTGTAGTACTCAACCAAGTCATTCTGAGAATAGTGTATGCGGCGACCGAGTTGCTCTTGGCCGCGTCAATACGGGATAATAC  
 CGCGCCACATAGCAGAAGTTTAAAGTGTCTCATCATTGGAAAACGTTCTTCGGGGGCGAAAACCTCAAGGATCTTACCGCTGTTG  
 AGATCCAGTTCGATGTAACCCACTCGTGCACCAACTGATCTTCAGCATCTTTTACTTTTACCAGCGTTTCTGGGTGAGCAAAAA  
 CAGGAAGGCAAAATGCCGCAAAAAAGGGAATAAGGGCGACACGAAATGTTGAATACTCAT

**2.2.13 Vector 66: Pyl tRNA<sub>UCCU(Ev2)</sub> PylRS mCherry-P2A-eGFP(150AGGA)**

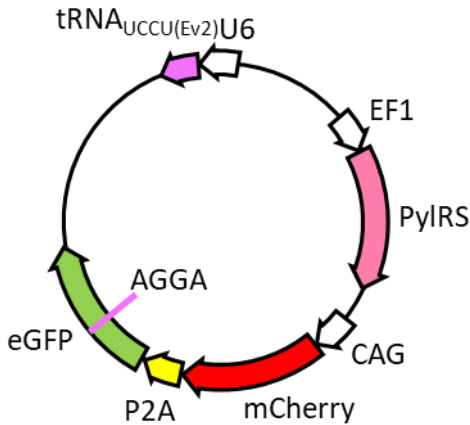

ACTCTTCCTTTTTCAATATTATTGAAGCATTATCAGGGTTATTGTCTCATGAGCGGATACATATTTGAATGTATTGAAAAATAAA  
 CAAATAGGGGTTCCGCGCACATTTCCCGGAAAAGTGCCACCTAAATTGTAAGCGTTAATATTTTGTAAAAATTCGCTTAAATTTTT  
 GTTAAATCAGCTCATTTTTTAACCAATAGGCCGAAATCGGCAAAATCCCTTATAAATCAAAAGAATAGACCGAGATAGGGTTGAGT  
 GTTGTTCAGTTTGAACAAGAGTCCACTATTAAGAACGTGGACTCCAACGTCAAAGGGCGAAAAACCGTCTATCAGGGCGAT  
 GGCCCACTAGCTGAACCATCACCTAATCAAGTTTTTGGGGTTCGAGGTGCCGTAAGCACTAAATCGGAACCCATAAGGGGAGC  
 CCCCATTAGAGCTTGACGGGAAAGCCGGCGAACGTGGCGAGAAAGGAAGGAAAGCAAGGAGCGGGCGTAGGG  
 CGCTGGCAAGTGTAGCGGTACGCTGCGCGTAACCACCACACCCGCCGCGCTTAATGCGCCGCTACAGGGCGCGTCCCATT  
 GCCATTACGGCTGCGCAACTGTTGGGAAGGGCGATCGGTGCGGGCCTCTTCGCTATTACGCCAGCTGGCGAAAGGGGGATGT  
 GCTGCAAGGCGATTAAGTTGGGTAACGCCAGGGTTTTCCAGTACGACGTTGTA AACGACGGCCAGTGAGCGCGCTCGTT  
 CATTACGTTTTTGAACCCGTGGAGGACGGGCGAGACTCGCGGTCAAATATTGTTTTACAGCGTGATGGAGCAGATGAAGATGCT  
 CGACCGCTGCAGAACCGCAGCTAGATTAACCTAGAAAGATAATCATATTTGACGTACGTTAAAGATAATCATGCGTAAAAAT  
 GACGCATGTGTTTTATCGTCTGTATATCGAGGTTTTATTAATTTGAATAGATATTAAGTTTTATTATTTACACTTACATACTA  
 ATAATAAATTCAACAACAATTTATTTATGTTTATTTATTTATTA AAAAAAACA AAAA ACTCAAAATTTCTTCTATAAAGTAACAAACTT  
 TTATGAGGGACAGCCCCCCCCAAAGCCCCAGGGATGTAATTACGTCCCTCCCCCGCTAGGGGGCAGCAGCGAGCCGCCCG  
 GGGCTCCGCTCCGTTCCGGCGCTCCCCCGCATCCCCGAGCCGGCAGCGTGCGGGGACAGCCCGGCCAGGGGAAGGTGG  
 CACGGGATCGTTTTCTGACCGCTTCTCGTCTTTGAGCTGCAGACACCTGGGGGGATACGGGGAAAAGGCCTAAAAA  
 CCGCACTTGTCT**CGGAACCCCGGAATCTAACCCGGTGAAGCGGATAGGAAGCCCTTCGATCTACATGATCAGGTTCCG**  
 GTGTTTC**GTCTTTCCACAAGATATATAAAGCCAAGAAATCGAAATACTTTCAAGTTACGGTAAGCATATGATAGTCCATTTTAAAA**  
**CATAATTTTAAACTGCAAACCTACCCAAGAAATTTACTTTCTACGTCACGTATTTTGTACTAATATCTTTGTGTTTACAGTCAAAT**  
**TAATTCATAATTCTCTCTAACACGCTTGATCGTATATGCAAAATATGAAGGAATCATGGGAAATAGGCCCTCTCCTGCCAACC**  
**GGTTGCGATCGCTCCGGTGCCCGTCAGTGGGAGAGCGCACATCGCCACAGTCCCGGAGAAAGTTGGGGGGAGGGGTCCGGA**  
**ATTGAACGGTGCCTAGAGAAGGTGGCGGGGTAACCTGGGAAAGTATGTCGTGTACTGGCTCCGCTTTTTCCCGAGGGT**  
**GGGGGAGAACCCTATATAAGTGCAGTAGTCCCGTGAACGTTCTTTTTTCGCAACGGGTTTTGCCCGCCAGAACACAGCTGAAGCTT**  
**CGAGGGGCTCGCATCTCTCTTACGCGCCCGCCGCTACCTGAGGCCGCCATCCACGCCGTTGAGTCGCGTCTGCGC**

CTCCCGCTGTGGTGCCTCTGAAGTGCCTCCGCGTCTAGTAAAGTTAAAGCTCAGGTCGAGACCGGGCCTTTGTCGGGG  
CTCCCTGGAGCCTACCTAGACTCAGCCGGCTCTCCACGCTTTGCTGACCCTGCTTGTCAACTCTACGCTTTGTTTCGTTTT  
CTGTTCTGCGCGTTACAGATCCAAGCTGTGACCGGCGCCTACTCTACAGATAGCGTTTAAACTTACGCTTGCCACC**ATGGCTA**  
**GCGACTACAAGGACGACGACGACAAGGACAAGAAGCCCTGAACACCCTGATCAGCGCCACAGGACTGTGGATGTCCAGAA**  
**CGGCACCATCCACAAGATCAAGCACCACGAGGTGTCCCGGTCAAATCTACATCGAGATGGCCTGCGGGGATCACCTGGT**  
**CGTCAACAACAGCAGAAGCAGCCGGACAGCCAGAGCCCTGCGGCACCACAAGTACAGAAAGACCTGCAAGCGGTGCAGAG**  
**TGTCCGACGAGGACTGAACAAGTTCCTGACCAAGGCAACGAGGACAGCCAGCCGTGAAAGTGAAGTGGTGTCCGCC**  
**CCACCCGACCAAGAAAGCCATGCCCAAGAGCGTGGCCAGAGCCCAAGCCCTGGAAAACACCGAAGCCGCTCAGGCC**  
**CAGCCCAGCGGCAGCAAGTTCAGCCCGCCATCCCCGTGTCTACCCAGGAAAGCGTCAGCGTCCCCGCCAGCGTGTCCACC**  
**AGCATCTCTAGCATCTCAACCGGCGCCACAGCTTCTGCCCTGGTCAAGGGCAACACCAACCCCATCACAGCATGTCTGCC**  
**CTGTGCAAGCCTCTGCCCCAGCCCTGACCAAGTCCCAGACCGACCGGTGGAAGTGTCTCTGAAACCCCAAGGACGAGATCA**  
**GCCTGAACAGCGGCAAGCCCTCCGGGAGCTGGAAGAGGAGCTGTGAGCCGGCGGAAGAAGGACCTCCAGCAAATCTACG**  
**CCGAGAACCGGGAAGTACCTGGGCAAGCTGGAAGAGAGATACCCGGTTCTTCGTGGAGCCGGGCTTCTGGAATCA**  
**AGAGCCCATCTGATCCCCCTGGAGTACATCGAGCGGATGGGCATCGACAACGACACCGAGCTGAGCAAGCAGATTTCCG**  
**GGTGACAAGAACTTCTGCTGCGGCCATGTGGCCCCAACCTGTACAACCTGCGGAAACTGGATCGCGCTCTGCC**  
**GACCCCATCAAGATTTTCGAGATCGGCCCTGCTACCGGAAAGAGAGCGACGGCAAAGAGCACCTGGAAGAGTTACAATGC**  
**TGAATTTTCCAGATGGGCAGCGGCTGCACAGAGAGAACCTGGAATCCATCATCACCGACTTTCTGAACCACTGGGGAT**  
**CGACTTCAAGATCGTGGGACAGCTGCATGGTGTACGGCAGACCCCTGGACGTGATGCACGGGACCTGGAATGTCTAG**  
**CGCGTCTGGGACCCATCCCTCTGACCCGGGAGTGGGCATCGATAAGCCCTGGATCGGAGCCGGCTTCCGCTGGAACG**  
**GCTGTGAAAGTCAAGCAGACTTTAAGAACATCAAGCGGGCTGCCAGAAGCGAGAGCTACTACAACGGCATCAGCACCAA**  
**CCTGTGATGATAAGGATCCACTAGTCCAGTGTGGTGAATTGACATTGATTATTGACTAGTTATTAATAGTAATCAATTACGGGGT**  
**CATTAGTTCATAGCCCATATATGGAGTTCGCGTTACATAACTTACGGTAAATGGCCCGCCTGGCTGACCGCCCAACGACCCCC**  
**GCCCATTTGACGTCAATAATGACGTATGTTCCCATAGTAACGCCAATAGGGACTTTCCATTGACGTCAATGGTGGAGATTTACG**  
**GTAACCTGCCACTTGGCAGTACATCAAGTGTATCATAGCAAGTACGCCCTTATTGACGTCAATGACGTTAAATGGCCCGC**  
**TGGCATTATGCCAGTACATGACCTTATGGGACTTTTCTACTTGGCAGTACATCTACGTATTAGTCATCGCTATTACCATGGTCA**  
**GGTGAGCCCCAGTTCTGCTTCACTCTCCCCATCTCCCCCCCCCTCCCCACCCCAATTTGTATTTATTTATTTTAAATATTTT**  
**TGCAGCGATGGGGGCGGGGGGGGGGGGGGGGGGGGGGGGGGGGGGGGGGGGGGGGGGGGGGGGGGGGGGGGGGGGGGG**  
**GGAGAGGTGCGGCGGCAGCCAATCAGAGCGGCGCGCTCCGAAAGTTTCTTTTATGGCGAGGGCGGGCGGGCGGGCGGGG**  
**ATAAAAAGCGAAGCGCGCGCGGGGGGGAGTCTGCTGCTTCCCTTCCCGCCCTGCCCCGCTCCCGCCCGCTCCGCGCCCTCGCGCC**  
**CGCCCCGGCTCTGACTGACCGCTTACTCCACAGGTGAGCGGGCGGGACCGCCCTTCTCTCCGGGCTGTAATTAGCGCTTG**  
**GTTTAAATGACGGCTCGTTTCTTTCTGTGGCTGCGTAAAGCCTTAAAGGGCTCCGGGAGGGCCCTTTGTGCGGGGGGGAGCG**  
**GCTCGGGGGGTGCGTGCCTGTGTGTGTGCGTGGGAGCGCCGCGTGCGGCCCGCGCTGCCCGCGGGCTGTGAGCGCTGCG**  
**GGCGCGGCGCGGGGCTTTGTGCGCTCCGCTGTGCGGAGGGAGCGCGCCGGGGGGGGGGGGGGGGGGGGGGGGGGGGGG**  
**GCTCGGAGGGAAACAAGGCTGCTGCGGGTGTGCTGCTGGGGGTGAGCAGGGGTGTGGCGCGGGCTGCGCGGGCTGCGG**  
**TAACCCCCCTCGACCCCTCCCGAGTTGCTGAGCACGGCCCGCTTCGGGTGCGGGGCTCCGTACGGGCGTGGCG**  
**GGGGCTCGCGTGCAGGGCGGGGGTGGCGGCAGGTGGGGTGCAGGGCGGGGGCGGGGGCGCCCTCGGGCCGGGGAGGG**  
**CTCGGGGAGGGGCGGGCGGGCCCGGAGCGCGGGCGCTGTGAGGGCGGGCGAGCCGCAGCCATTGCCTTTTATGGTA**  
**ATCGTGCAGAGGGGCGCAGGGACTTCTTTTCCCAAATCTGTGCGGAGGCCAAATCTGGGAGGGCGCCGCGCACCCCTCTA**  
**GCGGGCGGGGCGAAGCGGTGCGGCGCGGAGGAAAGTGGCGGGGAGGGCCCTTCTGCTGCGCGCCCGCCCTG**  
**CCCCTTCCCTCCAGCTCGGGCTGCGCGGGGGAGCGGTGCTTCCGGGGGAGCGGGGAGGGGGGGGGGGGGGGGGGGGG**  
**TTCTGGCGTGTGACCGGGCTCTAGAGCCTCTGCTAACCATGTTTATGCTTCTTTTCTTCTTCTTCTTCTTCTTCTTCTTCTT**  
**TGTTATTGTGCTGTCTCATTTTTGGCAAAGAATTGCGCCACC**ATGGTGAGCAAGGGCGAGGAGGATAACATGGCCATCATCA****  
**AGGAGTTTATGCGCTTCAAGGTGCACATGGAGGGTCCGTGAACGGCCACGAGTTCGAGATCGAGGGCGAGGGCGAGGGCC**  
**GCCCTACGAGGGCACCCAGCCGCAAGTGAAGGTGACCAAGGTGGCCCCCTGCCCTTCCCTGGGACATCCTGTCCC**  
**CTCAGTTATGACGGCTCAGGCTCAGGCTGAGTGAAGTGAAGTGAAGTGAAGTGAAGTGAAGTGAAGTGAAGTGAAGTGAAGT**  
**CTTCAAGTGGGAGCGCTGATGAACTTCGAGGACGGCGGGCTGGTACCCTGACCCAGGACTCCTCCCTGCAGGACGGCGA**  
**GTTTATCTACAAGGTGAAGTGCAGGACCAACTTCCCCTCCGACGGCCCCGTAAATGCAGAAGAAGACCATGGGCTGGGA**  
**GGCCTCTCCGAGCGGATGTACCCGAGGACGGCGCCCTGAAGGGCGAGATCAAGCAGAGGCTGAAGCTGAAGGACGGCG**  
**GCCACTACGACGCTGAGTCAAGACCACCTACAAGGCCAAGAAGCCCTGTCAGCTGCCCGGCGCTACAACCTCAACATCA**  
**AGTTGGACACTCCCAACAGGACTACACCTGTGGAACAGTACGAACAGGCGCCGAGGGCCGACCTCCACCTCCACCGCG**  
**GCATGGACGAGCTGTACGCGTCTGGAGGCGCCACCAATTTAGCGCTGTGAAACAGGCTGGCGACGTGGAAGAGAACCCTG**  
**GACCTGGACAAAAGTCCGTGAGCAAGGGCGAGGAGCTTTCACCGGGGTGGTGGCCATCCTGGTTCGAGCTGGACGGCGACG**  
**TAAACGGCCACAAGTTCAGCGTGTCCGCGAGGGCGAGGGCGATGCCACCTACGGCAAGCTGACCTGAAGTTCATCTGCA**  
**CCACCGGCAAGCTGCCCGTGGCCCTGGCCACCCTCGTACCACCCTGACCTACGGCGTGCAGTGTTCAGCCGCTACCCCGA**  
**CCACATGAAGCAGCAGACTTCTTCAAGTCCGCGATGCCGAGGCTACGTCAGGAGCGCACCATCTTCTTCAAGGACGAC**  
**GGCAACTACAAGACCCGCGCCGAGGTGAAGTTCGAGGGCAGCCCTGGTGAACCGCATCGAGCTGAAGGGCATCGACTTC**  
**AAGGAGGACGGCAACATCCTGGGGCACAAGCTGGAGTACAACCTACAACAGCCACAGGAGTCTATATCATGGCCGACAAGCA**  
**GAAGAACGGCATCAAGGTGAACCTCAAGATCCGCCACAACATCGAGGACGGCAGCGTGCAGCTGCGCGACCACTACCAGCA**  
**GAACACCCCATCGGCGACGGCCCGTGTGCTGCCGACAACCACTACCTGAGCAGCCAGTCCGCGCTGAGCAAAGACCC**  
**CAACGAGAAGCGGATCACATGCTCTGGAGTTCGTGACCGCCGCGGGATCACTCTCGCATGGACGAGCTGTACA**  
**GTAAGAATTCACCTCAGGTGCAGGCTGCCTATCAGAAGGTGGTGGCTGGTGTGGCCAATGCCCTGGCTCACAAATACCACTG**  
**AGATCTTTTTCCCTCTGCCAAAATATGGGGACATCATGAAGCCCTTGGATCTGACTTCTGGCTAATAAAGGAAATTTATTT**  
**TCATTGCAATAGTGTGTTGGAATTTTTGTGTCTCTCACTCGGAAGGACATATGGGAGGGTGCACAATCAACCTCTGGATTACA**  
**AAATTTGTGAAAGATTGACTGGTATTCTTAACTATGTTGCTCCTTTACGCTATGTGGATACGCTGCTTAAATGCCTTTGTATCATG**  
**CGTTAACTAACTTGTATTGTCAGCTTATAATGGTTACAATAAAGCAATAGCATCACAAATTTACAATAAAGCATTTTTTTTAC**  
**TGCATTCTAGTTGTGGTTTGTCCAAACTCATATGATCTTATCATGTCTGGAATTGACTCAAATGATGCAATAGTCTATCAGA**  
**AGCTATCTGGTCCCTTCCGGGGACAAGACATCCCTGTTAATATTTAAACAGCAGTGTTCCTCAAACTGGTATATATCCCT**  
**TGCTCTGGTCAACCAGTTGCAGGGTTTCTGTCTCACAGGAACGAAGTCCCTAAAGAAACAGTGGCAGCCAGGTTTAGCCCC**  
**GGAATTGACTGGATTCTTTTTAGGGCCATTGGTATGGCTTTTTCCCCGATCCCCCAGGTGTCTGCAGGCTCAAAGAGCAG**  
**CGAGAAGCGTTACAGAGGAAAGCAGTCCCGTGCACCTTCCCCGTCGCCGGGCTGTCCCCGACGCTGCCGGCTCGGGGATGC**  
**GGGGGAGCGCCGACCGGAGCGGAGCCCCGGGCTGCTGCTGCCCTAGCGGGGGAGGGGACGTAATTACATCCCTG**  
**GGGGCTTTGGGGGGGGTGTCCCTGATATCTATAACAAGAAATATATATAATAAAGTTATACGTAAGTGAACATGAAATAA**  
**CAATAAATATCGTATGAGTTAAATCTTAAAAGTACGTAAGATAATCATGCGTCAATTTGACTCACGCGGTGTTATAGTTCA**  
**AAATCAGTGACACTTACCGCATTGACAAGCAGCCTCACGGGAGCTCCAAGCGGCGACTGAGATGCTCTAAATGCACAGCGACG**

GATTCGCGCTATTTAGAAAAGAGAGCAATATTTCAAGAATGCATGCGTCAATTTTACGCAGACTATCTTTCTAGGGTTAATCTAG  
 CTGCATCAGGATCATATCGTCGGGTCTTTTTCCGGCTCAGTCATCGCCAAAGCTGGCGCTATCTGGGCATCGGGGAGGAAGAA  
 GCCCCGTGCTTTTTCCCGCGAGGTTGAAGCGGCATGGAAAGAGTTTGCCGAGGATGACTGCTGCTGCATTGACGTTGAGCGAAA  
 ACGCACGTTTACCATGATGATTTCGGGAAGGTGTGGCCATGCACGCCTTTAACGGTGAAGTGTTCGTTTCAGGCCACCTGGGATAC  
 CAGTTCGTGCGGGCTTTTTCCGGACACAGTTCGGGATGGTCAGCCCGAAGCGCATCAGCAACCCGAACAATACCGGCGACAGCC  
 GGAAGTCCCGTGCCGGTGTGCAGATTAATGACAGCGGTGCGGCGCTGGGATATTACGTCAGCGAGGACGGGTATCCTGGCTG  
 GATGCCGCAGAAATGGACATGGATACCCCGTGAAGTACCCGGCGGGCGCGCTTGGCGTAATCATGGTCATAGCTGTTTCTGT  
 GTGAAATTTGTTATCCGCTCACAATCCACACAACATACGAGCCGGAAGCATAAAAGTGTAAGCCTGGGGTGCCTAATGAGTGAG  
 CTAAGTACATTAATTGCGTTGCGCTCACTGCCCGCTTTCCAGTCGGGAAACCTGTGCTGCCAGCTGCATTAATGAATCGGCCAA  
 CGCGCGGGGAGAGGGGTTTGCATATTGGGCGCTCTTCCGCTTCTCGCTCACTGACTCGCTGCGCTCGGTCGTTCCGGCTGCG  
 GCGAGCGGTATCAGCTCACTCAAAGGCGGTAATACGGTTATCCACAGAATCAGGGGATAACGCAGGAAAGAACATGTGAGCAAA  
 AGGCCAGCAAAAGGCCAGGAACCGTAAAAAGGCCGCGTTGCTGGCGTTTTTCCATAGGCTCCGCCCCCTGACGAGCATCACA  
 AAAATCGACGCTCAAGTCAGAGGTGGCGAAACCCGACAGGACTATAAAGATACCAGGCGTTTTCCCCCTGGAAGCTCCCTCGTGC  
 GCTCTCCTGTTCCGACCCTGCCGCTTACCGGATACCTGTCCGCTTTCTCCCTTCGGGAAGCGTGGCGCTTTCTCATAGCTCAC  
 GCTGTAGGTATCTCAGTTCGGTGTAGGTCGTTCCGCTCCAAGCTGGGCTGTGTGCACGAACCCCGTTTCAGCCCGACCGCTGC  
 GCCTTATCCGGTAACTATCGTCTTGAAGTCCAACCCGTAAGACACGACTTATCGCCACTGGCAGCAGCCACTGGTAACAGGATT  
 AGCAGAGCGAGGTATGATAGGCGGTGCTACAGAGTTCCTGAAGTGGTGGCCTAACTACGGCTACACTAGAAGGACAGTATTTGGT  
 ATCTGCGCTCTGTGAAGCCAGTTACCTTCGAAAAAGAGTTGGTAGCTCTTATGATCCGGCAAACAACCACCGCTGGTAGCGGT  
 GGTTTTTTTTGTTGCAAGCAGCAGATTACGCGCAGAAAAAAGGATCTCAAGAAGATCCTTTGATCTTTTACGGGGTCTGACG  
 CTCAGTGGAAACGAAAACCTCACGTTAAGGGATTTTGGTCATGAGATTATCAAAAAGGATCTTCACCTAGATCCTTTTAAATTAATAA  
 GAAGTTTTAAATCAATCTAAAGTATATGAGTAAACTTGGTCTGACAGTTACCAATGCTTAATCAGTGAGGCACCTATCTCAGCG  
 ATCTGTCTATTTTCGTTTCATCCATAGTTGCCTGACTCCCGCTCGTGTAGATAACTACGATACGGGAGGGCTTACCATCTGGCCCCA  
 GTGCTGCAATGATACCGCGAGACCCACGCTCACCGGCTCCAGATTTATCAGCAATAAACCAGCCAGCCGGAAGGGCCGAGCGC  
 AGAAGTGGTCTGCAACTTTATCCGCTCCAATCCAGTCTATTAATTTGGCCGGAAGCTAGAGTAAGTAGTTCGCCAGTTAATA  
 GTTTGGCAACGTTGTTGCCATTGCTACAGGCATCGTGGTGTACGCTCGTCTTTGGTATGGCTTCATTACAGCTCCGGTTCCCA  
 ACGATCAAGGCGAGTTACATGATCCCCATGTTGTGCAAAAAGCGGTTAGCTCCTTCGGTCTCCGATCGTTGTCAGAAGTAAG  
 TTGGCCGAGTGTATCACTCATGTTATGGCAGCACTGCATAATTCTTACTGTATGCCATCCGTAAGATGCTTTTTCTGTGAC  
 TGGTGAAGTCAACCAAGTCACTTCTGAGAATAGTGTATGCGGGCAGCCGAGTTGCTCTTGGCCGCGTCAATACGGGATAATAC  
 CGCGCCACATAGCAGAACCTTAAAAAGTGTCTCATCATTGAAAACGTTCTTCCGGGCGAAAACCTCAAGGATCTTACCGCTGTTG  
 AGATCCAGTTCGATGTAACCCACTCGTGCACCCAACTGATCTTCAGCATCTTTTACTTTTACCAGCGTTTTCTGGGTGAGCAAAAA  
 CAGGAAGGCAAAATGCCGCAAAAAGGGAATAAGGGCGACACGAAATGTTGAATACTCAT

2.2.14 Vector 67: Pyl tRNA<sub>ACUA</sub> PylRS mCherry-P2A-eGFP(150TAGT)

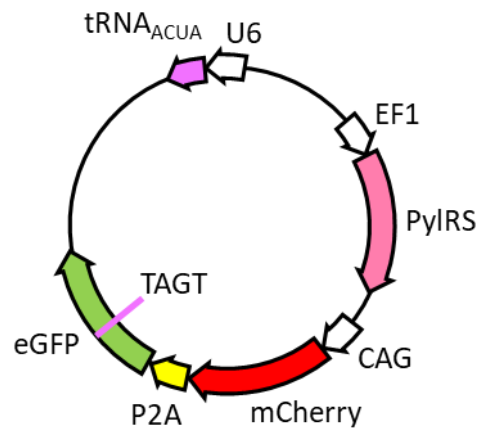

ACTCTTCTTTTTCAATATTATTGAAGCATTATCAGGGTTATTGTCTCATGAGCGGATACATATTTGAATGTATTTAGAAAAATAA  
 CAAATAGGGGTTCCGCGCACATTTCCCGGAAAAGTGCCACCTAAATGTAAGCGTAAATATTTGTTAAAATTCGCGTTAAATTTTT  
 GTTAAATCAGCTATTTTTAAACCAATAGGCCGAAATCGGCAAAATCCCTTATAAATCAAAAAGAAATAGACCGAGATAGGGTTGAGT  
 GTTGTCCAGTTTGAACAAGAGTCCACTATTAAGAACGTGGACTCCAACGTCAAAGGGGCGAAAAACCGTCTATCAGGGCGAT  
 GGCCCACTACGTGAACCATCACCTAATCAAGTTTTTTGGGTGAGGTGCCGTAAAGCACTAAATCGGAACCCCTAAAGGGAGC  
 CCCCATTAGAGCTTGACGGGGAAAGCCGCGCAACGTGGCGAGAAAGGAAGGGAAGAAAGCGAAAAGGAGCGGGCGCTAGGG  
 CGCTGGCAAGTGTAGCGGTACGCTGCGGTAACCACCACACCCGCGCGCTTAATGCGCCGCTACAGGGCGCGTCCATTCC  
 GCCATTACGGCTGCGCAACTGTTGGGAAGGGCGATCGGTGCGGGCCTCTTCGCTATTACGCCAGCTGGCGAAAGGGGGATGT  
 GCTGCAAGGCGATTAAGTTGGTAACGCCAGGGTTTTCCAGTACGACGTTGTAAAACGACGGCCAGTGAGCGCGCCTCGTT  
 CATTACGTTTTTGAACCCGTGGAGGACGGGACAGCTCGCGGTGCAAAATGTGTTTTACAGCTGATGGAGCAGATGAAGATGCT  
 CGACACGCTGCAGAAACACGCACTAGATTAACCCTAGAAAAGATAATCATATTGTGACGTACGTTAAAGATAATCATGCGTAAAAT  
 GACGCATGTGTTTTATCGGTCTGTATATCGAGGTTATTTAATTTGAATAGATATTAAGTTTTATTATTTACACTTACATACTA  
 ATAATAAATTAACAAAACAATTTATTTATGTTATTTATTTAATAAAAAAACAATAAACTCAAAATTTCTTCTATAAAGTAACAAAACCT  
 TTATGAGGGACAGCCCCCCCCAAAGCCCCAGGGATGTAATTACGTCCCTCCCCCGCTAGGGGGCAGCAGCGAGCCGCCCG  
 GGGCTCCGCTCCGGTCCCGCGCTCCCCCGCATCCCCGAGCCCGGACGCGTGGGGGACAGCCCGGGCACGGGGAAGGTGG  
 CACGGGATCGCTTCTCTGAACGCTTCTCGTGTCTTTGAGCCTGCAGACACCTGGGGGATACGGGGAAAAGCCCTAAAAA  
 CCGCACTTGTCCGAAACCCCGGAACTCAACCCGGCTGAACGGATTAGTAGTCCATTTCGATCTACATGATCAGGTTTCCGG  
 TGTTCGTCCTTTCCACAAGATATATAAAGCCAAGAAATCGAAACTTTCAAGTTACGGTAAGCATATGATAGTCCATTTTAAAC  
 ATAATTTTAAAAGTCAAACCTACCCAAGAAATTAATCTTTCTACGTCAGCATTTTGTACTAATATCTTTGTGTTTACAGTCAAAT  
 AATTCTAATTAATCTCTTAACAGCCTTGTATCGTATGCAAAATGAAAGATCATGGGAAATAGGCCCTTTCCTGCCAACCCG  
 GTTGCATCGCTCCGGTCCCGTCAAGTGGCGAGAGCCACATCGCCACAGTCCCGGAGAAGTTGGGGGAGGGGTCGGCAA  
 TTGAACGGGTGCCTAGAGAAGGTGGCGCGGGTAAACTGGGAAAGTGATGTCGTGTACTGGCTCCGCTTTTTCCCGAGGGTG  
 GGGGAGAACCCTATATAAGTGCAGTAGTCGCCGTGAACGTTCTTTTTCGCAACGGGTTTGGCCGAGAACACAGCTGAAGCTT



AAATCAGTGACACTTACCGCATTGACAAGCACGCCTCACGGGAGCTCCAAGCGGGGACTGAGATGTCTAAATGCACAGCGCAGC  
 GATTCGCGCTATTTAGAAAAGAGAGCAATATTTCAAGAATGCATGCGTCAATTTTACGCAGACTATCTTTCTAGGGTTAATCTAG  
 CTGCATCAGGATCATATCGTCGGGTCTTTTTCCGGCTCAGTCATCGCCCAAGCTGGCGCTATCTGGGCATCGGGGAGGAAGAA  
 GCCCCGTGCCTTTCCCGCAGAGTTGAAGCGGCATGGAAAGAGTTTGCCGAGGATGACTGCTGCTGCATTGACGTTGAGCGAAA  
 ACGCACGTTTACCATGATGATTTCGGGAAGGTGTGGCCATGCACGCCTTTAACGGTGAAGTGTTCGTTTCAGGCCACCTGGGATAC  
 CAGTTTCGTCGCGGCTTTCCGGACACAGTCCGGATGGTCAGCCCGAAGCGCATCAGCAACCCGAACAATACCGGCGACAGCC  
 GGAAGTCCCGTGCCGGTGTGCAGATTAATGACAGCGGTGCGGCGCTGGGATATTACGTCAGCGAGGACGGGTATCCTGGCTG  
 GATGCCGCAGAAATGGACATGGATACCCCGTGAGTTACCCGGCGCGCTTGGCGTAATCATGGTCATAGCTGTTTCCTGT  
 GTGAAATTGTTATCCGCTCACAATCCACACAACATACGAGCCGGAAGCATAAAGTGTAAGCCTGGGGTGCCTAATGAGTGAG  
 CTAATCACAATTAATTGCGTTGCGCTCACTGCCCGCTTTCCAGTCGGGAAACCTGTCGTGCCAGCTGCATTAAATGAATCGGCCAA  
 CGCGCGGGGAGAGGGCGGTTTGCATATTGGGCGCTCTTCCGCTTCCCTCGCTCACTGACTCGCTGCGCTCGGTCTCGGCTGCG  
 GCGAGCGGATCAGCTCACTCAAAGGCGGTAATACGGTTATCCACAGAATCAGGGGATAACGCAGGAAAGAACATGTGAGCAAA  
 AGCCAGCAAAAAGGCCAGGAACCGTAAAAAGGCCGCTGCTGGCGTTTTTCCATAGGCTCCGCCCCCTGACGAGCATCACA  
 AAAATCGACGCTCAAGTCAGAGGTGGCGAAACCCGACAGGACTATAAAGATACCAGGCGTTTTCCCCCTGGAAGCTCCCTCGTGC  
 GCTCTCCTGTTCCGACCCTGCCGTTACCGGATACCTGTCCGCTTTCTCCCTTCGGGAAGCGTGGCGTTTTCTCATAGCTCAC  
 GCTGTAGGTATCTCAGTTCGGTGTAGGTCGTTCCGCTCCAAGCTGGGCTGTGTGCACGAACCCCGTTCCAGCCCGACCGCTGC  
 GCCTTATCCGGTAACTATCGTCTTGAGTCCAACCCGGTAAGACACGACTTATCGCCACTGGCAGCAGCCACTGGTAACAGGATT  
 AGCAGAGCGAGGTATGTAGCGGTGTACAGAGTTCTTGAAGTGGTGGCCTAACTACGGCTACACTAGAAGGACAGTATTTGGT  
 ATCTGCGCTCTGCTGAAGCCAGTTACCTTCGGAAGGAGTTGGTAGCTTTGATCCGGCAAAACAAACCCAGCTGGTAGCGGT  
 GGTTTTTTTGTTTGAAGCAGCAGATTACGCGCAGAAAAAAGGATCTCAAGAAGATCCTTTGATCTTTTCTACGGGGTCTGACG  
 CTCAGTGAACGAAAACCTCACGTTAAGGGATTTTGGTCATGAGATTATCAAAAAGGATCTTACCTAGATCCTTTTAAATAAAAAT  
 GAAGTTTTAAATCAATCTAAAGTATATGAGTAAACTTGGTCTGACAGTTACCAATGCTTAATCAGTGAGGCACCTATCTCAGCG  
 ATCTGTCTATTTGTTTATCCATAGTTGCTGACTCCCCGTCGTGTAGATAACTACGATACGGGAGGGCTTACCATCTGGCCCCA  
 GTGTGCAATGATACCGCGAGACCCAGCTCACCAGGCTCCAGATTTATCAGCAATAAACAGCCAGCCGGAAGGGCCGAGCGC  
 AGAAGTGGTCTGCAACTTTATCCGCTCCATCCAGTCTATTAATTGTTGCCGGAAGCTAGAGTAAGTAGTTCGCCAGTTAATA  
 GTTTGCGCAACGTTGTTGCCATTGCTACAGGCATCGTGGTGTACGCTCGTCTTTGGTATGGCTTCATTACGCTCCGGTTCCCA  
 ACGATCAAGGCGAGTTACATGATCCCCATGTTGTGCAAAAAAGCGGTTAGCTCCTTCGGTCTCCGATCGTTGTGAGAAGTAAG  
 TTGGCCGAGTGTATCACTCATGTTATGGCAGCAGTGCATAATTCTTACTGTATGCCATCCGTAAGATGCTTTTCTGTGAC  
 TGGTAGTACTCAACCAAGTCATTCTGAGAATAGTGTATGCGGCGACCGAGTTGCTCTTGGCCGCGTCAATACGGGATAATAC  
 CGCGCCACATAGCAGAACTTTAAAAAGTCTCATCATTGGAACCGTTCTTCCGGGGCGAAAACTCTCAAGGATCTTACCGCTGTTG  
 AGATCCAGTTCGATGTAACCCACTCGTGCACCCAACTGATCTTACGATCTTTTACTTTTACCAGCGTTTTCTGGGTGAGCAAAAA  
 CAGGAAGGCCAAAATGCCGCAAAAAAGGGAATAAGGGCGACACGAAATGTTGAATACTCAT

2.2.15 Vector 68: Pyl tRNA<sub>CCUA</sub> PylRS mCherry-P2A-eGFP(150TAGG)

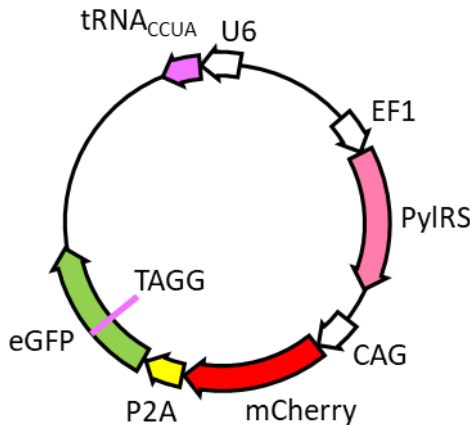

ACTCTTCTTTTTCAATATTATTGAAGCATTATCAGGGTTATTGTCTCATGAGCGGATACATATTTGAATGTATTTAGAAAAATAAA  
 CAAATAGGGGTTCCGCGCACATTTCCCGGAAAAGTGCCACCTAAATGTAAGCGTTAATATTTTGTAAAAATTCGCGTTAAATTTTT  
 GTTAAATCAGCTCATTTTTTAACCATAAGGCCGAAATCGGCAAAATCCCTTATAAATCAAAGAATAGACCGAGATAGGGTTGAGT  
 GTTGTCCAGTTTGAACAAGAGTCCACTATTAAGAACGTGGACTCCAACGTCAAAGGGCGAAAAACCGTCTATCAGGGCGAT  
 GGCCCACTACGTGAACCATCACCTAATCAAGTTTTTTGGGTCGAGGTGCCGTAAGCACTAAATCGGAACCCATAAGGGGAGC  
 CCCCCATTTAGAGCTTGACGGGGAAAGCCGGCGAACGTGGCGAGAAAGGAAGGGAAGAAAGCGAAAGGAGCGGGCGCTAGGG  
 CGCTGGCAAGTGTAGCGGTCACGCTGCGCGTAACCACACACCCGCCGCGCTTAATGCGCCGCTACAGGGCGCGTCCCATTC  
 GCCATTCAGGCTGCGCAACTGTTGGGAAGGGCGATCGGTGCGGGCTCTTCGCTATTACGCCAGCTGGCGAAAGGGGGATGT  
 GCTGCAAGGCGAATTAAGTTGGTAACGCCAGGGTTTTCCAGTACGACGTTGTA AACGACGCGCCAGTGAGCGCGCTCGT  
 CATTACGTTTTTGAACCCGTGGAGACGGGACGACTCGCGTGC AAATGTGTTTTACAGCGTGATGGAGCAGATGAAGATGCT  
 CGACACGCTGCAGAACACGCAGCTAGATTAACCCTAGAAAGATAATCATATTGTGACGTACGTTAAAGATAATCATGCGTAAAT  
 GACGCATGTGTTTTATCGTCTGTATATCGAGGTTATTTATTAATTTGAATAGATATTAAGTTTTATTATTTTACACTTACATACTA  
 ATAATAAATTAACAACAATTTATTTATGTTTATTTATTTAAAAAAAACAAAACTCAAAATTTCTTCTATAAAGTAACAAAATT  
 TTATGAGGGACAGCCCCCCCCAAAGCCCCAGGGATGTAATACGTCCCTCCCCCGCTAGGGGGCAGCAGCGAGCCGGCCCC  
 GGGCTCCGCTCCGGTCCGCGCTCCCGGCATCCCGGACCGCGCAGCTGCGGGGACAGCCGGCACGGGACAGGGTGG  
 CACGGGATCGCTTTCTCTGAACGCTTCTCGCTGCTTTT GAGCCTGCAGACACTGGGGGATACGGGAAAAAGGCTAAAAA  
 CCGCACTTGTCCGAAACCCGGGAATCTAACCCGGCTGAACGGATTAGGAGTCCATTTCGATCTACATGATCAGGTTCCGG  
 TGTTTCGCTTTCCACAAGATATATAAAGCCAAGAAATCGAAATACTTTCAAGTTACGGTAAGCATATGATAGTCCATTTTAAAC  
 ATAATTTTAAACTGCAAACTACCCAAAGAAATTAATCTTTCTACGTCAGCATGTAATTTGACTAATATCTTTGTGTTTACAGTCAAAT  
 AATTCTAATTACTCTAACAGCCTTGATCGTATATGCAAAATGACAGGATTCATGGAAATAGGCCCTTCCCTGCCAACCCG  
 GTTGCATCGCTCCGGTCCCGTCAAGTGGCAGAGCGCACATCGCCACAGTCCCGGAGAAGTTGGGGGAGGGGTCGGCAA  
 TTGAACGGGTGCCTAGAGAAGGTGGCGGGGTAACCTGGGAAAGTGTGCTGCTGACTGGCTCCGCTTTTTCCGAGGGTG

GGGGGAAACCGTATATAAGTGCAGTAGTCGCCGTGAACGTTCTTTTTTCGCAACGGGTTTGCCGCCAGAACACAGCTGAAGCTTC  
GAGGGGCTCGCATCTCTCCTTACGCGCCCGCCGCTACCTGAGGCCCATCCACGCCGTTGAGTCGCTTCTGCCGCT  
CCCCGCTGTGGTGCCTCTGAAGTGCCTCCGCTTAGGTAAGTTAAAGCTCAGGTCGAGACCGGGCTTTGTCCGGCGCT  
CCCTTGAGCCTACCTAGACTCAGCCGGCTCTCCACGCTTTGCTGACCCTGCTTGCTCAACTCTACGCTTTGTTTCGTTTTCT  
GTTCTGCGCGTTACAGATCCAAGCTGTGACCGGGCGCTACTCTACAGATAGCGTTAAACTTACGCTTGCCACC**ATGGCTAGC**  
**GACTACAAGGACGACGACGACAAGGACAAGAAGCCCTGAACACCCTGATCAGCGCCACAGGACTGTGGATGCCAGAACC**  
**GGCACCATCCACAAGATCAAGCACCACGAGGTGTCCCGTCCAAAATCTACATCGAGATGGCTGCGGGCATCACCTGTGTC**  
**TCAACAACAGCAGAAGCAGCCGGACAGCCAGAGCCCTGCGGCACCACAAGTACAGAAAGACCTGCAAGCGGTGCAGAGTGT**  
**CCGACGAGGACCTGAACAAGTTCCTGACCAAGGCCAACGAGGACCAGACCAGCGTGAAAGTGAAGTGGTGTCCGCCCCCA**  
**CCCGGACCAAGAAAGCCATGCCAAGAGCGTGGCCAGAGCCCAAGCCCTGGAAAACACCGAAGCCGCTCAGGCCAG**  
**CCCAGCGGCAGTAAGTTCAGCCCCGCCATCCCCGTGTCTACCCAGGAAAGCGTCAAGCGTCCCCGCCAGCGTTCACCAGC**  
**ATCTAGCATCTCAACCGGCGCCACAGCTTCTGCCCTGGTCAAGGGCAACCAACCCCATACCAGCATGTCTGCCCTGT**  
**GCAAGCTCTGCCCAAGCCCTGACCAAGTCCCAGACCCAGCCGCTGGAAGTGTCTCTGAACCCCAAGGACGATGACGCT**  
**GAACAGCGCAAGCCCTTCCGGGAGCTGGAAGCGAGCTGCTGAGCCGGCGGAAGAAGGACCTCCAGCAAATCTACGCCG**  
**AGGAACGGGAGAACTACCTGGCAAGCTGGAAGAGAGATCACCCGTTCTTCTGAGCCGGGGCTTCTGGAAATCAAGA**  
**GCCCCATCCTGATCCCCCTGGAGTACATCGAGCGGATGGGCATCGACAACGACACCGAGCTGAGCAAGCAGATTTCCGGGT**  
**GGACAAGAATTCTGCCTGCGGCCATGCTGGCCCCAACCTGTACAACCTGCGGAAACTGGATCGGCTCTGCCGAC**  
**CCCATCAAGATTTTCGAGATCGGCCCTGCTACCGGAAAGAGCGACGGCAAGAGCACCTGGAAGATTTACAATGCTGA**  
**ACTTTTCCAGATGGGCAGCGCTGACCCAGAGAGAACCTGGAATCCATCATCACCAGCTTTCTGAACCCATGATGACGCT**  
**CTTCAAGATCGTGGGCGACAGCTGCATGGTGTACGGCGACACCCTGGACGTGATGCACGGCGACCTGGAAGTGTCTAGCGC**  
**CGTCTGGGACCCATCCCTCTGGACCGGGAGTGGGGCATCGATAAGCCCTGGATCGGAGCCGGCTTCCGGCTGGAACGGCT**  
**GCTGAAAGTCAAGCAGACTTAAAGAATCAAGCGGGCTGCCAGAAGCGAGAGCTACTACAACGGCATCAGCACCAACT**  
**GTGATGATAAGGATCCACTAGTCCAGTGTGGTGAATTGACATTGATTATTGACTATTATAATAGTAATCAATTACGGGGCTCAT**  
**TAGTTCATAGCCCATATATGGAGTTCGCGCTTACATAAATTACGGTAAATGGCCCGCTGGCTGACCCGCCAACGACCCCGCC**  
**CATTGACGTCAATAATGACGTATGTTCCCATAGTAACGCCAATAGGGACTTTCCATTGACGTCAATGGGTGGAGTATTTACGGTA**  
**AACTGCCCACTTGGCAGTACATCAAGTGTATCATATGCCAAGTACGCCCCCTATTGACGTCAATGACGGTAAATGGCCCGCCTG**  
**GCATTATGCCAGTACATGACCTTATGGGACTTTCTACTTGGCAGTACATCTACGTATTAGTCATCGCTATTACCATGGTCGAGG**  
**TGAGCCCCACGTTCTGCTTCACTCTCCCCATCTCCCCCCCCCCCCACCCCAATTTGTATTTATTTATTTTAAATTTTTGTG**  
**CAGCGATGGGGCGGGGGGGGGGGGGGGGGGGCGCGCCAGGCGGGGGGGGGGGGGGGGGGGGGGGGGGGGGGGGGGGGGGG**  
**GAGAGGTGCGGCGGCAGCCAATCAGAGCGGCGCGCTCCGAAAAGTTTCTTTTATGGCGAGGCGGCGGGCGGCGGCGCCCTAT**  
**AAAAAGCGAAGCGCGCGGGCGGGGGGAGTCTGCTGCTTCCGCTTCCGCGCTCCGCGCCGCTCCGCGCCGCTCCGCGCCCG**  
**CCCCGGCTCTGACTGACCGCTTACTCCACAGGTGAGCGGGCGGGACGCGCCCTTCTCTCCGGGCTGTAATTAGCGCTTGGT**  
**TAAATGACGGCTCGTTCTTTCTGTGGCTGCGTGAAGGCTTAAAGGGCTCCGGGAGGGCCCTTGTGCGGGGGGGAGCGGC**  
**TCGGGGGTGCGTGTGTGTGTGTGTGTGTGTGTGTGTGTGTGTGTGTGTGTGTGTGTGTGTGTGTGTGTGTGTGTGTGTGT**  
**CGCGCGCGGGGCTTTGTGCGCTCCGCGTGTGCGCGAGGGGAGCGCGCGCGGGGGGGGGGGGGGGGGGGGGGGGGGGGGGG**  
**GCGAGGGGAACAAAGGCTGCGTGTGGGGTGTGTGCGTGGGGGGGTGAGCAGGGGGTGTGGCGCGGCGGTCGGGCTGTAA**  
**CCCCCCCCCTGCACCCCCCTCCCGAGTTGCTGAGCACGGCCCGGCTTCCGGTGTGGGGCTCCGTACGGGGCGTGGCGCGGG**  
**GCTCGCCGTGCGGGCGGGGGGGTGGCGGCAGGTGGGGGTGCCGGCGGGGGCGGGGGCCGCTCGGGCCGGGGAGGGCTCG**  
**GGGAGGGGGCGGGGGCCCGGAGCGCGCGGGCTGTGAGGCGCGGGCGAGCCGACGCCATTGCCTTTATGGTAATCG**  
**TCCGAGAGGCGCAGGGACTTCCCTTGTCCAAATCTGTGCGAGCCGAAATCTGGAGGCGCCCTGACCCCGCACCCTCTAGCG**  
**GGCGCGGGGCGAAGCGGTGCGGCGCCGGCAGGAAGGAAATGGGCGGGGAGGGCCTTCTGCGTGTGCGCGCGCCGCTCC**  
**CTTCTCCCTCTCCAGCCTCGGGGCTGTCCGCGGGGGGACGGCTGCCTTCCGGGGGGACGGGGCAGGGCGGGGTTCCGGCTC**  
**TGGCGTGTGACCGGGCGGCTCTAGAGCCCTGCTAACCATGTTTCATGCTTCTTCTTTTCTTCTTCTTCTTCTTCTTCTTCTTCT**  
**GTTATTGTGCTGTCTCATTTTTGGCAAAGAATTCGCCACC**ATGGTGAGCAAGGGCGAGGAGGATAACATGGCCATCATCAA****  
**GGAGTTCATGCGCTTCAAGGTGCATGGAGGGCTCGTGAACGGCCACGAGTTCGAGATCGAGGGCGAGGGCGAGGGCC**  
**GCCCCACGAGGGCACCCAGACCGCCAAGCTGAAGGTGACCAAGGGTGGCCCCCTGCCCTTCGCTGGGACATCCTGTCC**  
**CTCAGTTCATGTACGGCTCAAGGCCTACGTGAAGCACCCGCGGACATCCCCGACTACTTGAAGCTGTCTTCCCCGAGGG**  
**CTTCAAGTGGGAGCGCGTGAATTCGAGGACGGCGGGCTGGTGAACCGTACCCAGGACTCCTCCCTGCAGGACGGCGA**  
**GTTTCATACAAGGTGAAGCTGCGCGCACCAACTTCCCTCCGACGGCCCCGTAATGCAGAAGAAGACCATGGGCTGGGA**  
**GGCCTCTCCGAGCGGATGATACCCGAGGACGGCCCTGAAGGGCGAGATCAAGCAGAGGCTGAAGCTGAAGGACGGCG**  
**GCCACTACGACGCTGAGTCAAGACCCTACAAGGCCAAGAAGCCGTCAGCTGCCGGCGCCTACAACCTCAACATCA**  
**AGTTGGACATCACCTCCACAACGAGGACTACACCATCGTGAACAGTACGAACGCGCCGAGGGCGCCACTCCACCGCG**  
**GCATGGACGAGCTGTACGCGTGTGGAGGC**GCCACCAATTTAGCCTGCTGAAACAGGCTGGCGACGTGGAAGAGAACCCTG****  
****GACCTGGACAAAAGTCGGTGAGCAAGGGCGAGGAGCTGTTACCCGGGTGGTGCCATCCTGGTTCGAGCTGGACGGCGACG****  
**TAAACGGCCACAAGTTCAGCGTGTCCGGCGAGGGCGAGGGCGATGCCACCTACGGCAAGCTGACCTGAAGTTCATCTGCA**  
**CCACCGCAAGCTGCCCGTCCCTGGCCACCCTCGTACCACCTGACCTACGCGTGCAGTCTTACGCCGCTACCCCGA**  
**CCACATGAAGCAGCAGACTTCTTCAAGTCCGCCATGCCGAAAGGCTACGTCCAGGAGCGCACCATCTTCTTCAAGGACGAC**  
**GGCAACTACAAGACCCGCGCCGAGGTGAAGTTCGAGGGCGACACCCTGGTGAACCGCATCGAGCTGAAGGGCATCGACTTC**  
**AAGGAGGACGGCAACATCCTGGGGCACAAGCTGGAGTACAACATAACAGCCACT**TAGG**GTCTATATCATGGCCGACAAGCA**  
**GAAGAACGGCATCAAGGTGAACCTCAAGATCCGCCACAACATCGAGGACGGCAGCGTGCAGCTGCCGACCACTACAGCA**  
**GAACACCCCATCGGCGACGGCCCGTGTGTCTGCCCGACAACCACTACCTGAGCACCCAGTCCGCCCTGAGCAAAAGACCC**  
**CAACGAGAAGCGGATCACATGGTCTGCTGGAGTTCGTGACCGCCGCGGGATCACTCTCGGCATGGACGAGCTGTACAA**  
**GTAA**GAAATCACTCCTCAGGTGCAGGCTGCCTATCAGAAGTGGTGGCTGGTGTGGCCAATGCCCTGGCTCACAATACCACTG  
AGATCTTTTTCCCTCTGCCAAAATATGGGGACATCATGAAGCCCTTGAAGTCTGACTTCTGGCTAATAAAGGAAATTTATTT  
TCATTGCAATAGTGTGTTGAAATTTTTGTGTCTCTCACTCGGAAGGACATATGGGAGGGTTCGACAATCAACCTCTGGATTACA  
AAATTTGTGAAAGATTGACTGGTATTCTAACTATGTTGCTCCTTTTACGCTATGTGGATACGCTGCTTAAATGCCTTTGTATCATG  
CGTTAACTAACTTTGTTTATTGACGTTATAATGGTTACAATAAAGCAATAGCATCACAATTTTCAACAATAAAGCAATTTTTCAC  
TGCATTCTAGTTGTGGTTTGTCCAAACTCATCAATGTATCTTATCATGTCTGGAATTGACTCAAATGATGTCAATTAGTCTATCAGA  
AGCTATCTGGTCTCCCTTCCGGGGGACAAGACATCCCTGTTTAAATTTAAACAGCAGTGTCCCAAACCTGGGTTCTTATATCCCT  
TGCTCTGGTCAACCAGGTTGCAGGGTTTCTGTCTCACAGGAACGAAGTCCCTAAAGAAACAGTGGCAGCCAGGTTTAGCCCC  
GGAATTGACTGGATTCTTTTATGGGCCATTTGGTATGGCTTTTCCCGGATCCCCCAGGTGCTGCAGGCTCAAAGAGCAG  
CGAGAAGCGTTCAGAGGAAAGGACGATCCCGTGCCACTTCCCGTCCCGGATCCCCGACGCTGCCCCGACGCTGCCCCGAGGATGC  
GGGGGGAGCGCCGACCGGAGCGGAGCCCGGGCGGCTCGCTGCTGCCCCCTAGCGGGGGAGGGACGTAATTACATCCCTG  
GGGGCTTTGGGGGGGGGGTGTCCCTGATATCTATAACAAGAAAATATATATAATAAGTTATCACGTAAGTAGAACATGAAATAA

CAATATAATTATCGTATGAGTAAATCTTAAAAGTCACGTAAAAGATAATCATGCGTCATTTTGACTCACGCGGTGCTTATAGTTCA  
AAATCAGTGACACTTACCGCATTGACAAGCACGCCCTCACGGGAGCTCCAAGCGGCGACTGAGATGTCTAAATGCACAGCGACG  
GATTCGCGCTATTTAGAAAAGAGAGCAATATTTCAAGAATGCATGCGTCAATTTTACGCAGACTATCTTTCTAGGGTTAATCTAG  
CTGCATCAGGATCATATCGTCGGGTCTTTTTCCGGCTCAGTCATCGCCAAAGCTGGCGCTATCTGGGCATCGGGGAGGAAGAA  
GCCCCGTGCCTTTTCCCGCGAGGTTGAAGCGGCATGGAAGAGTTTGGCGAGGATGACTGCTGCTGCATTGACGTTGAGCGAAA  
ACGCACGTTTACCATGATGATTTCGGGAAGGTGTGGCCATGCACGCCCTTAAACGGTGAACGTTTCGTTTCAGGCCACCTGGGATAC  
CAGTTCTGTCGCGGCTTTTCCGGACACAGTTCGGGATGGTCAGCCCCGAAGCGCATCAGCAACCCGAACAATACCGGCGACAGCC  
GGAAGTCCCGTGCAGCTCACTCAAAGCGGTAATACGGTTATCCACAGAATCAGGGGATAACGCAGGAAAGAACATGTGAGCAA  
GATGCCGCAGAAATGGACATGGATAACCCGTGAGTTACCCGGCGGGCGCGCTTGGCGTAATCATGGTCATAGCTGTTTCTGT  
GTGAAATTGTTATCCGCTCACAATCCACACAACATACGAGCCGGAAGCATAAAGTGTAAGCCTGGGGTGCCTAATGAGTGAG  
CTAACTCACATTAATTGCGTTGCGCTCACTGCCCGCTTTCCAGTCGGGAAACCTGTGCTGCCAGCTGCATTAATGAATCGGCCAA  
CGCGCGGGGAGAGGCGGTTTGCATTTGGCGCTCTTCCGCTTCTCGCTCACTGACTCGCTGCGCTCGGTCGTTCCGGCTGCG  
GCGAGCGGTATCAGCTCACTCAAAGCGGTAATACGGTTATCCACAGAATCAGGGGATAACGCAGGAAAGAACATGTGAGCAA  
AGGCCAGCAAAAAGGCCAGGAACCGTAAAAAGGCCGCGTGTGCTGGCGTTTTTCCATAGGCTCCGCCCCCTGACGAGCATCACA  
AAAATCGACGCTCAAGTCAGAGGTGGCGAAACCCGACAGGACTATAAAGATACCAGGCGTTTTCCCCCTGGAAGCTCCCTCGTGC  
GCTCTCCTGTTCCGACCCTGCCGTTACCGGATACCTGTCCGCTTTCTCCCTTCGGGAAGCGTGGCGCTTTCTCATAGCTCAC  
GCTGTAGGTATCTCAGTTCGGTGTAGTTCGTTCCGCTCCAAGCTGGGCTGTGTGCACGAACCCCGTTTCAGCCCGACCGCTGC  
GCCTTATCCGGTAACTATCGTCTTGTAGTCCAACCCGGTAAGACAGGACTTATCGCCACTGGCAGCAGCCACTGGTAACAGGAT  
AGCAGAGCGAGGTATGTAGCGGTGCTACAGAGTTCCTTGAAGTGGTGGCCTAACTACGGCTACACTAGAAGGACAGTATTTGGT  
ATCTGCGCTCTGCTGAAGCCAGTTACCTTCGGAAAAAGAGTTGGTAGCTCTTGATCCGGCAAAACAAACCACCGCTGGTAGCGGT  
GGTTTTTTGTTTGAAGCAGCAGATTACGCGCAGAAAAAAGGATCTCAAGAAGATCCTTTGATCTTTTCTACGGGGTCTGACG  
CTCAGTGAACGAAAACCTCACGTTAAGGGATTTTGGTCATGAGATTATCAAAAAGGATCTTACCTAGATCCTTTTAAATTAATAAAT  
GAAGTTTAAATCAATCTAAAGTATATGAGTAACTTGGTCTGACAGTTACCAATGCTTAATCAGTGAGGCACCTATCTCAGCG  
ATCTGCTATTTTCGTTTCATCCATAGTTGCCTGACTCCCCGTCGTGTAGATAACTACGATACGGGAGGGCTTACCATCTGGCCCCA  
GTGCTGCAATGATACCGCGAGACCCACGCTCACCGGCTCCAGATTTATCAGCAATAAACCCAGCCAGCCGGAAGGGCCGAGCGC  
AGAAGTGGTCTGCAACTTTATCCGCTCCATCCAGTCTATTAATTGTTGCCGGGAAGCTAGAGTAAGTAGTTCGCCAGTTAATA  
GTTTGGCAACGTTGTTGCCATTGCTACAGGCATCGTGGTGTACGCTCGTCTTGGTATGGCTTCATTACAGCTCCGGTTCCCA  
ACGATCAAGGCGAGTTACATGATCCCCCATGTTGTGCAAAAAAGCGTTAGCTCCTTCGGTCTCCGATCGTTGTGAGAAGTAAG  
TTGCCCGCAGTGTATCACTCATGGTTATGGCAGCACTGCATAATTCTTACTGTGCATGCCATCCGTAAGATGCTTTTCTGTGAC  
TGGTGAGTACTCAACCAAGTCATTCTGAGAATAGTGTATGCCGGGACCGAGTTGCTCTTGGCCGCGTCAATACGGGATAATAC  
CGCGCCACATAGCAGAACCTTAAAAGTGCTCATCATTGGAACCGTTCTTCGGGGCGAAAACCTCTCAAGGATCTTACCGCTGTTG  
AGATCCAGTTCGATGTAACCCACTCGTGCACCCAACTGATCTTCAGCATCTTTTACTTTTACCAGCGTTTCTGGGTGAGCAAAAA  
CAGGAAGGCCAAAATGCCGCAAAAAAGGGAATAAGGGCGACACGGAAATGTTGAATACTCAT

2.2.16 Vector 69: Pyl tRNA<sub>GCUA</sub> PylRS mCherry-P2A-eGFP(150TAGC)

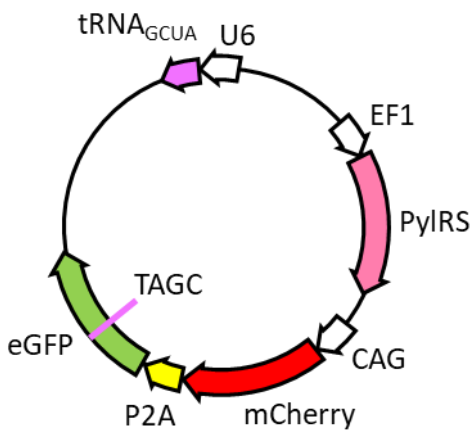

ACTCTTCTTTTTCAATATTATTGAAGCATTATCAGGGTTATTGTCTCATGAGCGGATACATATTTGAATGTATTTAGAAAAATAAA  
CAAATAGGGGTTCCGCGCACATTTCCCGGAAAAGTGCCACCTAAATTGTAAGCGTTAATATTTTGTAAAATTCGCGTTAAATTTTT  
GTTAAATCAGCTCATTTTTTAACCAATAGGCCGAAATCGGCAAAATCCCTATAAATCAAAGAATAGACCGAGATAGGGTTGAGT  
GTTGTTCCAGTTTGGAAACAAGAGTCCACTATTAAGAACGTGGACTCCAACGTCAAAGGGCGAAAAACCGTCTATCAGGGCGAT  
GGCCACTACGTGAACCATCACCTAATCAAGTTTTTGGGGTCGAGGTGCCGTAAGCACTAAATCGGAACCCCTAAAGGGAGC  
CCCCGATTTAGAGCTTGACGGGGAAAGCCGGCGAACGTGGCGAGAAAGGAAGGGAAGAAAGCGAAAGGAGCGGGCGCTAGGG  
CGCTGGCAAGTGTAGCGGTACCGCTGCGCGTAACCACCACACCCGCGCGCTTAATGCGCCGCTACAGGGCGCGTCCCATTCC  
GCCATTCAGGCTGCGCACTGTTGGAAAGGGCGATCGGTGCGGCTCTTCGCTATTACGCCAGCTGGCGAAAGGGGGATGT  
GCTGCAAGCGATTAAGTTGGTAACGCCAGGGTTTTCCAGTCACGACGTTGTA AAAACGACGGCCAGTGAGCGCGCCTCGTT  
CATTACGTTTTTGAACCCGTGGAGGACGGGACAGCTCGCGGTGCAAAATGTGTTTTACAGCGTGATGGAGCAGATGAAGATGCT  
CGACACGCTGCAGAACACGCAGCTAGATTAACCCTAGAAAGATAATCATATTGTGACGTACGTTAAAGATAATCATGCGTAAAAT  
GACGCATGTGTTTTATCGTCTGTATATCGAGGTTATTTAATTTGAATAGATTAAGTTTTATTATTTACACTTACATACTA  
ATAATAAATCAACAACAATTTATTTATGTTTATTTATTTAATAAAAAAACA AAAA ACTCAAATTTCTTCTATAAAGTAACAAAACCT  
TTATGAGGGACAGCCCCCCCCAAAGCCCCAGGATGTAATTACGTCCTCCCTCCCGCTAGGGGCGAGCAGCGAGCCGCCCG  
GGGCTCCGCTCCGGTCCGCGCTCCCCCGCATCCCCGAGCCGCGAGCGTGCGGGGACAGCCGGCCACGGGAAGGTGG  
CACGGGATCGCTTCTCTGAACGTTCTCGCTGCTCTTTGAGCCTGCAGACACCTGGGGGATAACGGGAAAAGGCCATAAAA  
CCGCACTTGTCCGAAACCCCGGGAATCTAACCCGGCTGAACGGATTAGCAGTCCATTTCGATCTACATGATCAGGTTCCGG  
TGTTTCGTCTTTCCACAAGATATATAAAGCCAAAGAAATCGAAATACTTTCAAGTTACGGTAAGCATATGATAGTCCATTTAAAC  
ATAATTTAAAACCTACCAACTACCCAAAGAAATTAATCTTACGTCACGTAATTTGTAATAATCTTTGTTTACAGTCAAAT  
AATTCATAATATCTCTCTAACAGCCTTGATCGTATATGCAAAATGAAGGAATCATGGGAAATAGGCCCTTCTCCGCCAACCG  
GTTGCGATCGCTCCGGTGCCGTCAGTGGGACAGCGCACATCGCCACAGTCCCCGAGAAGTTGGGGGGAGGGTCCGGCAA

TTGAACGGGTGCCTAGAGAAGGTGGCGGGGTAAACTGGGAAAGTGATGTCGTGTAAGTGGCTCCGCCTTTTTCCCGAGGGTG  
GGGGAACCGTATATAAGTGCAGTAGTCGCCGTGAACGTTCTTTTTCGCAACGGGTTTCCGCCAGAACACAGCTGAAGCTC  
GAGGGGCTCGCATCTCTCCTTACGCGCCCGCCGCCCTACCTGAGGCGCCATCCACGCCGTTGAGTCGCGTTCTGCCGCCT  
CCCGCCTGTGGTGCCTCCTGAAGTGCCTCCGCGTCTAGGTAAGTTAAAGCTCAGGTCGAGACCGGGCCTTTGTCCGGCGCT  
CCCTTGAGCCTACCTAGACTCAGCCGGCTCTCCACGCTTTGCCCTGACCCTGCTTGTCAACTCTACGTCTTTGTTTCGTTTTCT  
GTTCTGCGCGTTACAGATCCAAGCTGTGACCGGCGCCTACTCTACAGATAGCGTTTAAACTTACGCTTGCCACC**ATGGCTAGC**  
**GACTACAAGGACGACGACGACAAGGACAAGAAGCCCTGAACACCTGTACAGCGCCACAGGACTGTGGATGCCAGAACC**  
**GGCACCATCCACAAGATCAAGCACCACGAGGTGTCCCGTCCAAAATCTACATCGAGATGGCCTGCGCGCATCACCTGGTGC**  
**TCAACAACAGCAGAAGCAGCCGGACAGCCAGAGCCCTGCGGCACCACAAGTACAGAAAGACCTGCAAGCGGTGCAGAGTGT**  
**CCGACGAGGACCTGAACAAGTTCCTGACCAAGGCCAACGAGGACCAGACCAGCGTGAAGTGAAGTGGTGTCCGCCCCCA**  
**CCCGGACCAAGAAAGCCATGCCAAAGAGCGTGGCCGATGCCCCCAAGCCCTGGAAAACACCGAACGCCGCTCAGGCCAG**  
**CCGACGCGCAGCAAGTTCAGCCCGCCCTCCCGTGTCTACCCAGGAAAGCGTCAGCGTCCCGCAGCGTGTCCACCAGC**  
**ATCTCTAGATCTCAACCGCGCCACAGCTTCTGCCCTGGTCAAGGGAAACCAACCCCATCACCAGCATGTCTGCCCTGT**  
**GCAAGCCTCTGCCCAGCCCTGACCAAGTCCAGACCCGAGCCGCTGGAAGTGTCTCTGAACCCCAAGGACGAGATCAGCCT**  
**GAACAGCGCAAGCCCTCCGGGAGCTGGAAGCGAGCTGTGAGCCGGCGGAAGAAGGACCTCCAGCAAATCTACGCCG**  
**AGGAACGGGAGAAGTACCTGGGCAAGCTGGAAGAGAGATCACCCGTTCTTCGTGGACCGGGGCTTCTGGAATCAAGA**  
**GCCCCACTGATCCCTGGAGTACATCGAGCGATGGGCATCGACAACGACACCGAGCTGAGCAAGCAGATTTTCCGGGT**  
**GGACAAGAATCTGCCTCGGCCCTGCTGGCCCAACTGTACAACCTGCGGAACTGGATCGGCTCGCCGAC**  
**CCCATCAAGATTTTCAGATCGGCCCTGCTACCGAAAGAGAGCGCAAGAGCACCTGGAAGAGTTTACAATGCTGA**  
**ACTTTTCCAGATGGGCGAGCGGCTGCACCAGAGAGAAGCTGGAATCCATCATCACCGACTTTCTGAACCACCTGGGGATCGA**  
**CTTCAAGATCGTGGGCGACAGCTGCATGGTGTACGGCGACACCCTGGACGTGATGCACGGCGACCTGGAAGTGTCTAGCGC**  
**CGTCTGGGACCCATCCCTGCTGACCCGGAGTGGGGCTGAAAGCCCTGGATCGGAGCCGGCTCCGGCTGGAACGGCT**  
**GCTGAAAGTCAAGCAGCAGCTTTAAGAACATCAAGCGGGTGCACAAGCGAGAGCTACTACAACCGCATCAGACCAACT**  
**GTGATGATAAGGATCCACTAGTCCAGTGTGGTGAATTGACATTGATTATTGACTAGTTAATAAGTAATCAATTACGGGGTCAT**  
**TAGTTCATAGCCATATATGGAGTTCGCGTTACATAACTTACGGTAAATGGCCCGCCTGGCTGACCGCCCAACGACCCCGCC**  
**CATTGACGTCAATAATGACGTATGTTCCCATAGTAACGCCAATAGGGACTTTCCATTGACGTCAATGGGTGGAGTATTACGGTA**  
**AACTGCCCACTTGGCAGTACATCAAGTGTATCATATGCCAAGTACGCCCCCTATTGACGTCAATGACGGTAAATGGCCCGCCTG**  
**GCATTATGCCAGTACATGACCTTATGGGACTTTCCTACTTGGCAGTACATCTACGTATTAGTCATCGCTATTACCATGGTTCGAGG**  
**TGAGCCCCACGTTCTGCTTCACTCTCCCATCTCCCCCCTCCCCACCCCAATTTTGTATTATTTTAAATTTTAAATTTTGTG**  
**CAGCGATGGGGCGGGGGGGGGGGGGGGCGCGCCAGGCGGGGGCGGGCGGGGCGAGGGGCGGGGCGGGGCGAGGGC**  
**GAGAGGTGCGGCGCAGCCAATCAGAGCGGCGCGCTCCGAAAGTTTCTTTTATGGCGAGGCGGCGGGCGGCGGCGCCCTAT**  
**AAAAAGCGAAGCGCGCGGGCGGGGAGTCCGCTGCGTTGCTTCCGCCCGTCCCGCGCTCCGCGCCGCTCGCGCCGCCCG**  
**CCCCGGCTGACTGACCCGCTTACTCCACAGGTGAGCGGGGAGCGGGGACCGCCCTTCTCTCCGGGCTGTAATTAGCGCTTGGT**  
**TTAATGACGGCTCGTTCTTTTCTGGCTCGTGAAGGCTTAAAGGCTCCGGGAGGGCCCTTTGTGCGGGGGGAGCGGC**  
**TCGGGGGTGCGTGCCTGTGTGTGTGCTGGGAGCGCGCTGCGGCCCGCGCTGCCCGCGGCTGTGAGCGCTGCGGG**  
**CGCGGCGCGGGGCTTTGTGCGCTCCGCGTGTGCGGAGGGGAGCGCGGGCGGGGGCGGTGCCCGCGGTGCGGGGGGGCT**  
**GCGAGGGGAACAAAGGCTGCGTGCGGGGTGTGTGCGTGGGGGGTGTGAGCAGGGGGTGTGGGCGCGCGGTCGGGCTGTAA**  
**CCCCCCCCGACCCCCCTCCCCGAGTTGCTGAGCACGGCCCGGCTTCGGGTGCGGGGCTCCGTACGGGGCGTGGCGCGG**  
**GCTCGCCGTGCGGGCGGGGGTGGCGGAGTGGGGTTCGGGCGGGGCGGGGCGGGGCGGGGCGGGGCGGGGCGGGGCTCG**  
**GGGAGGGGCGCGCGGCCCGGAGCGCGCGGCTGTCGAGGCGCGGAGCCGACGCCATTGCTTTTTATGGTAATCG**  
**TGCGAGAGGGCGCAGGGACTTCTTTGTCCCAAATCTGTGCGGAGCCGAAATCTGGGAGGCGCCGCGCACCCCTCTAGCG**  
**GGCGGGGGCGAAGCGGTGCGGCGCCGCGAGGAAGGAATGGCGGGGAGGGCCTTCGTGCGTCCCGCGCCGCGCTCC**  
**CTTCTCCCTCTCCAGCCTCGGGGCTGTCCGCGGGGGACGGCTGCCTTCGGGGGGACGGGGCAGGGCGGGGTTCCGGCTT**  
**TGGCGTGTGACCGGGCGGCTTAGAGCCTGTGTAACCATGTTATGCTTCTTTTCTTCTACAGCTCCTGGGCAACGTGCTG**  
**GTTATTGCTGTCTCATTTTTGGCAAAGAATTCGCCACCATGGTGAGCAAGGGCAGGGAGGATAACATGGCCATCATCAA**  
**GGAGTTCATGCGCTTCAAGGTGCACATGGAGGGCTCCGTGAACGGCCACGAGTTTCGAGATCGAGGGCGAGGGCGAGGGCC**  
**GCCCCTACGAGGGCACCCAGACCGCCAAGCTGAAGGTGACCAAGGTGGCCCCCTGCCCTTCGCTGGGACATCCTGTCCC**  
**CTCAGTTCATGTACGGCTCAAGGCCTACGTGAAGCACCCGCGGACATCCCCGACTACTTGAAGCTGTCTTCCCCGAGGG**  
**CTTCAAGTGAAGGCGCGTGTGAACTTCGAGGACGGCGGGTGTGACCGTGACCCAGGACTCCTCCCTGCAGGACGGCGA**  
**GTTTCATCAAGGTGAAGTGCAGGCGACCAACTCCCTCCGACGGCCCGTAAATGCAGAAGAAGACCATGGGCTGGGA**  
**GGCCTCTCCGAGCGGATGTACCCGAGGACGGCGCCCTGAAGGGCAGATCAAGCAGAGGCTGAAGCTGAAGGACGGCG**  
**GCCACTACGACGCTGAGGTCAAGACCACCTACAAGGCCAAGAAGCCCGTGCAGCTGCCCGGCGCCTACAACGTCAACATCA**  
**AGTTGGACATCACCTCCACAACGAGGACTACACCATCGTGAACAGTACGAACCGCGCCGAGGGCGCCACTCCACCGCG**  
**GCATGGACGAGCTGTACGCGTCTGGAGGCGCCACCAATTTAGCCTGCTGAAACAGGCTGGCGACGTGGAAGAGAACCCTG**  
**GACCTGGACAAAAGTCGGTGAGCAAGGGCGAGGAGCTGTTACCCGGGTGGTGGCCATCCTGGTGCAGCTGGACGGCGACG**  
**TAAACGGCCACAAGTTCAGCGTGTCCGCGAGGGCGAGGGCGATGCCACCTACGGCAAGCTGACCTGAAGTTCATCTGCA**  
**CCACCGGCAAGCTGCCCGTGCCTGGCCACCCTCGTACCACCCTGACCTACGGCGTGCAGTGTCTCAGCCGCTACCCCGA**  
**CCACATGAAGCAGCAGACTTCTTCAAGTCCGCCATGCCGAAGGCTACGTCCAGGAGCGCACCATCTTCTTCAAGGACGAC**  
**GGCAACTACAAGACCCGCGCCGAGGTGAAGTTCGAGGGCGACACCCTGGTGAACCGCATCGAGCTGAAGGGCATCGACTTC**  
**AAGGAGGACGGCAACATCTGGGGCACAAGCTGGAGTACAACACTACAACAGCCACTAGCGTCTATATCATGGCCGACAAGCA**  
**GAAGAACGGCATCAAGGTGAACCTCAAGATCCGCGACAACATCGAGGACGGCGAGCTGCGCCAGCCACTACAGCA**  
**GAACACCCCATCGGCGACGGCCCGTGTGCTGCCGACAACCACTAGCTGAGCACCCAGTCCGCCCTGAGCAAAGACC**  
**CAACGAGAAGCGGATCACATGGTCTGTGGAGTTCGTGACCGCGCGGGATCACTCTCGGCATGGACGAGCTGTACAA**  
**GTAAGAATCACTCCTCAGGTGCAGGCTGCCTATCAGAAGGTGGTGGCTGGTGTGGCAATGCCCTGGCTCACAATAACCACTG**  
**AGATCTTTTTCCCTCTGCCAAAATATGGGGACATCATGAAGCCCTTGAGCATCTGACTTCTGGCTAATAAAGGAAATTTATTT**  
**TCTATTGCAATAGTGTGTTGAAATTTTTGTGTCTCTCACTCGGAAGACATATGGGAGGGTGCACAATCAACCTCTGGATTACA**  
**AAATTTGTGAAGATTGACTGTTTAACTATGTTGCTCTTTTACGCTATGTTGGATCGTCTTAAATGCTTTGTATCATG**  
**CGTTAACTAAACTTGTATTGTCAGCTTATAATGGTTACAATAAAGCAATAGCATCACAAATTTACAATAAAGCATTTTTTTTAC**  
**TGCATTCTAGTTGTGTTTGTCCAAACTCATCAATGTATCTTATCATGTCTGGAATTGACTCAAATGATGTCAATTAGTCTATCAGA**  
**AGCTATCTGGTCTCCCTCCGGGGACAAGACATCCCTGTTTAAATTTAAACAGCAGTGTTCCAAACCTGGGTTCTTATACCTT**  
**GTCTGTGTCACCAAGTTGAGGGTTTCTGTCTCACAGGAACCAAGTCCCTAAAGAAACAGTGGCAGCCAGTTTAGCCCC**  
**GGAATTGACTGGATTCCTTTTTAGGGCCACTTGGTATGCTTTTTCCCGTATCCCCCAAGTGTCTCCCGCAGGCTCAAAGAGCAG**  
**CGAGAAGCGTTACAGAGAAAGCGATCCCGTGCACCTTCCCGTGCCTGGGCTGTCCCGCACGCTGCCGGCTCGGGGATGC**  
**GGGGGAGCGCCGACCGGAGCGGAGCCCGGGCGGCTCGCTGCTGCCCTAGCGGGGAGGGACGTAATTACATCCCTG**



GGGGCTTTGGGGGGGGGGCTGTCCCTGATATCTATAACAAGAAAATATATATAATAAGTTATCACGTAAGTAGAACATGAAATAA  
 CAATATAATTATCGTATGAGTTAAATCTTAAAAGTCACGTAAGATAATCATGCGTCATTTTACTCACGCGGTGTTATAGTTCA  
 AAATCAGTGACACTTACCGCATTGACAAGCACGCTCACGGGAGCTCCAAGCGGGGACTGAGATGTCTAAATGCACAGCGACG  
 GATTCGCGCTATTTAGAAAAGAGAGCAATATTTCAAGAATGCATGCGTCAATTTTACGCAGACTATCTTTCTAGGGTTAATCTAG  
 CTGCATCAGGATCATATCGTCGGGTCTTTTTCCGGCTCAGTCATCGCCAAAGCTGGCGCTATCTGGGCATCGGGGAGGAAGAA  
 GCCCGTGCCTTTTCCGCGAGGTTGAAGCGGCATGGAAGAGATTTGCCGAGGATGACTGCTGCTGACATTGACGTTGAGCGAAA  
 ACGCAGCTTTACCATGATGATTCGGGAAGGTGTGGCCATGCACGCTTTAACGGTGAAGTGTTCGTTTCAGGCCACCTGGGATA  
 CAGTTTCGTCGCGCTTTTCCGGACACAGTTCCGGATGGTCAGCCGAGCCGATCAGCAACCCGAACAATACCGGCGACAGCC  
 GGAAGTCCCGTGCCGGTGTGCAGATTAATGACAGCGGTGCGGCGCTGGGATATTACGTCAGCGAGGACGGGTATCCTGGCTG  
 GATGCCGACAGAAATGGACATGGATACCCCGTGAGTTACCCGGCGGGCGCGCTTGGCGTAATCATGGTCATAGCTGTTTCTGT  
 GTGAAATTGTTATCCGCTCACAAATCCACACAACATACGAGCCGGAAGCATAAAGTGTAAAGCCTGGGGTGCCTAATGAGTGAG  
 CTAAGTCACTAATTTGCGTTGCGCTCACTGCCCGCTTTCCAGTCGGGAAACCTGTGCTGCCAGCTGCATTAATGAATCGGCCAA  
 CGCGCGGGGAGAGGGCGTTTGGCTATTGGGCGCTTCCGCTTCCCTCGTCACTGACTCGCTCGGTCGGTTCGGCTGCG  
 GCGAGCGGTATCAGCTCACTCAAAGGCGGTAATACGGTTATCCACAGAATCAGGGGATAACGCAGGAAAGAACATGTGAGCAAA  
 AGGCCAGCAAAAGGCCAGGAACCGTAAAAAGGCCGCGTGTGCTGGCGTTTTTCCATAGGCTCCGCCCCCTGACGAGCATCACA  
 AAAATCGACGCTCAAGTCAGAGGTGGCGAAACCCGACAGGACTATAAAGATACCAGGCGTTTTCCCCCTGGAAGCTCCCTCGTGC  
 GCTCTCCTGTTCCGACCCCTGCCGCTTACCGGATACCTGTCCGCTTTCTCCCTTCGGGAAGCGTGGCGCTTTCTCATAGCTCAC  
 GCTGTAGGTATCTCAGTTCGTTGTTAGTTCGTTCCGTTCCGACTGGGCTGTGTGCACGAACCCCGTTCCAGCCGACCGCTGC  
 GCCTTATCCGGTAACTATCGTCTTGGTCCAACCCGTAAGACACGACTTATCGCCACTGGCAGCAGCCACTGGTAAACAGGATT  
 AGCAGAGCGAGGTATGTAGGCGGTGCTACAGAGTTCTTGAAGTGGTGGCTAACTACGGCTACACTAGAAGGACAGTATTTGGT  
 ATCTGCGCTCTGCTGAAGCCAGTTACCTTCGGAAAAAGAGTTGGTAGCTCTTGATCCGGCAAACAACCACCGCTGGTAGCGGT  
 GGTTTTTTGTTTGAAGCAGCAGATTACGCGCAGAAAAAAGGATCTCAAGAAGATCCTTTGATCTTTTCTACGGGGTCTGACG  
 CTCAGTGGAAACGAAAACCTCACGTTAAGGGATTTTGGTTCATGAGATTATCAAAAAGGATCTTACCTAGATCCTTTTAAATAAAAAT  
 GAAGTTTTAAATCAATCAAAGTATATGAGTAAACTTGGTCTGACAGTTACCAATGCTTAATCAGTGAGGCACCTATCTCAGCG  
 ATCTGTCTATTTTGGTTATCCATAGTTGCCTGACTCCCGCTCGTGTAGATAACTACGATACGGGAGGGCTTACCATCTGGCCCA  
 GTGCTGCAATGATACCGCGAGACCCACGCTCACCGGCTCCAGATTTATCAGCAATAAACCAGCCAGCCGGAAGGGCCGAGCGC  
 AGAAGTGGTCTGCAACTTTATCCGCCCTCATCCAGTCTATTAATTGTTGCCGGGAAGCTAGAGTAAGTAGTTCGCCAGTTAATA  
 GTTTGCGCAACGTTGTTGCCATTGCTACAGGCATCGTGGTGTACGCTCGTCTTGGTATGGCTTCACTCAGCTCCGGTCCCA  
 ACGATCAAGGCGAGTTACATGATCCCCCATGTTGTGCAAAAAAGCGTTAGCTCCTTCGGTCTCCGATCGTTGTCAGAAGTAAG  
 TTGGCCGAGTGTATCACTCATGTTATGGCAGCACTGCATAATTCTTACTGTGATGCCATCCGTAAGATGCTTTTCTGTGAC  
 TGGTGAGTACTCAACCAAGTCATTCTGAGAATAGTGTATGCGGGGACCGAGTTGCTCTTGGCCGCGTCAATACGGGATAATAC  
 CGCGCCACATAGCAGAAGTTTAAAAGTGCTCATATTGAAAACGTTCTTCCGGGGCGAAAACCTCTCAAGGATCTTACCGCTGTTG  
 AGATCCAGTTCGATGTAACCCACTCGTGCACCCAACTGATCTTACGATCTTTTACTTTTACCAGCGTTTTCTGGGTGAGCAAAAA  
 CAGGAAGGCAAAATGCCGCAAAAAAGGGAATAAGGGCGACACGGAAATGTTGAATACTCAT

2.2.17 Vector 71: Tyr tRNA<sub>CUA</sub> TyrRS\* mCherry-P2A-eGFP(150TAG)

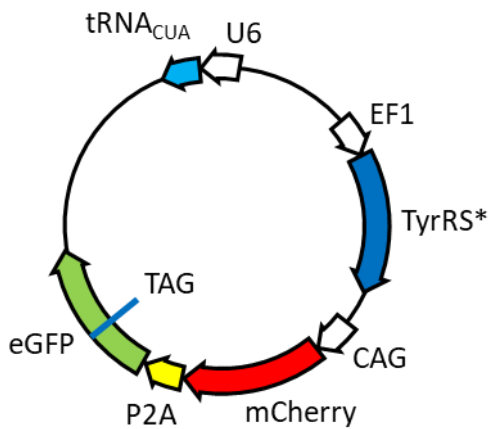

ACTCTTCCTTTTCAATATTATGAAGCATTATCAGGGTTATTGTCTCATGAGCGGATACATATTTGAATGTATTTAGAAAAATAA  
 CAAATAGGGTCCGCGCACATTTCCCGAAAAGTGCCACCTAAATGTAAGCGTTAATATTTGTTAAAATTCGCGTTAAATTTTT  
 GTTAAATCAGCTCATTTTTTAAACCAATAGGCCGAAAATCGGCAAAAATCCCTTATAAATCAAAAAGAATAGACCGAGATAGGGTTGAGT  
 GTTGTCCAGTTTGAACAAGAGTCCACTATTAAGAACGTGGACTCCAACGTCAAAGGGCGAAAAACCGTCTATCAGGGCGAT  
 GGCCCACTACGTGAACCATCACCTAATCAAGTTTTTTGGGGTTCGAGGTGCCGTAAGCACTAAATCGGAACCCATAAAGGGAGC  
 CCCCAGTTTAGAGCTTGACGGGGAAAGCCGGCGAACGTGGCGAGAAAGGAAAGGAAAGCGAAAGGAGCGGGCGCTAGGG  
 CGCTGGCAAGTGTAGCGGTACGCTGCGCGTAACCACACACCCGCGCTTAAATGCGCCGCTACAGGGCGCGTCCCATT  
 GCCATTACGGTACGCAACTGTTGGGAAGGGGATCCGTTGCGGGCCCTTTCGCTATTACGCCAGCTGGCGAAAAGGGGGATGT  
 GCTGCAAGGCGATTAAGTTGGGTAACGCCAGGGTTTTCCAGTACGACGTTGTA AACGACGGCCAGTGAGCGCGCTCGTT  
 CATTACGTTTTTGAACCCGTGGAGGACGGCAGACTCGCGGTGCAATGTGTTTTACAGCGTGATGGAGCAGATGAAGATGCT  
 CGACACGCTGCAGAACACGCAGCTAGATTAACCCTAGAAAGATAATCATATTGTGACGTACGTTAAAGATAATCATGCGTAAAT  
 CAGCGATGTGTTTTATCGTGTATATCGAGGTTATTTATTAATTTGAATAGATATTAAGTTTTATTATTTACACTTACATACTA  
 ATAATAAATCAACAACAATTTATTTATTTATTTATTTAAAAAACAACCAAAATTTCTTCTATAAAGTAAACAACAACTT  
 TTATGAGGGACAGCCCCCCCCCAAAGCCCCAGGGATGTAATTACGTCCCTCCCCCGTAGGGGGCAGCAGCGAGCCGCCCC  
 GGGCTCCGCTCCGGTCCGGCGCTCCCCCGCATCCCCGAGCCGGCAGCGTGGGGGACAGCCGGGCAGGGGAAGGTGG  
 CACGGGATCGCTTCTCTGAACGCTTCTCGCTGCTTTGAGCCTGCAGACCTTGGGGGATACGGGGAAAAGGCCATAAAAA  
 CCACACTTGTCTGGTGGGGGAAGGATTCGAACCTTCGAAGTCTGTGACGGCAGATTAGAGTCTGCTCCCTTGGCCGCTCGG  
 GACCCACCGGTTCTGTCCTTTCCACAAAGATATATAAAGCCAAAGAACTCGAAACTTTCAAGTTGCTGTAAGCATATGATG  
 TCCATTTTAAAAACATAATTTTAAAAGTCAAACCTACCCAAAGAAATTTACTTTCTACGTCAGTATTTTGTACTAATATCTTTGT  
 TACAGTCAAATTAATTCTAATTATCTCTAACAGCCTTGATCGTATATGCAAAATGAAGGAATCATGGGAATAGGCCCTTCT



GGGGGCTGTCCCTGATATCTATAACAAGAAAATATATATATAAAGTTATCACGTAAGTAGAACATGAAATAACAATAATTATC  
 GTATGAGTTAAATCTTAAAAGTCACGTAAGATAATCATGCGTCAATTTGACTCACGCGGTCGTTATAGTTCAAAAACAGTGACA  
 CTTACCGCATTGACAAGCACGCCTCACGGGAGCTCCAAGCGGGGACTGAGATGTCTAAATGCACAGCGACGGATTTCGCGCTA  
 TTTAGAAAAGAGAGCAATATTTCAAGAATGCATGCGTCAATTTACGCAGACTATCTTTCTAGGGTTAATCTAGCTGCATCAGGA  
 TCATATCGTGGGTCTTTTTCCGGCTCAGTCATCGCCCAAGCTGGCGCTATCTGGGCATCGGGGAGGAAGAAGCCCGTGCCCT  
 TTCCCGCAGGTTGAAGCGGCATGGAAAAGAGTTTGCCGAGGATGACTGCTGCTGATTGACGTTGAGCGAAAACGCACGTTTAC  
 CATGATGATTCGGGAAGGTGTGGCCATGCACGCCTTAAACGGTGAACGTGTTCTGTTAGGCCACCTGGGATACCAGTTCCGTCGG  
 GCTTTCCGGACACAGTTCCGGATGGTCAGCCCGAAGCGCATCAGCAACCCGAACAATACCAGCGACAGCCGGAACCTGCCGTG  
 CCGGTGTGCAGATTAATGACAGCGGTGCGGCGCTGGGATATTACGTCAGCGAGGACGGGTATCCTGGCTGGATGCCGAGAAA  
 TGGACATGGATACCCCGTGAGTTACCCGGCGGGCGCGCTGGCGTAATCATGGTCATAGCTGTTTCTGTGTGAAATTGTTATC  
 CGCTCACAATTCACACACATACGAGCCGGAAGCATAAAGTGTAAAGCCTGGGGTGCCTAATGAGTGAGCTAACTCACATTAAT  
 TGCGTTGCGCTCACTGCCCGCTTTCCAGTCGGGAAACCTGTGTCGCCAGCTGCATTAATGAATCGGCCAACGCGCGGGGAGAG  
 GCGTTTTGCGTATTGGGCGCTTCCGCTTCCGCTCACTGACTCGTGCCTCGGCTCGGTCGTTCCGGCTGCGGCGAGCGGTATCA  
 GCTCACTCAAAGGCGGTAATACGGTTATCCACAGAATCAGGGGATAACGCAGGAAAGAATGTGAGCAAAAAGGCCAGCAAAAAG  
 GCCAGGAACCGTAAAAGGCCGCTTGTGCGCTTTTTCCATAGGCTCCGCCCCCTGACGAGCATCAGAAAATCGACGCTCA  
 AGTCAGAGGTGGCGAAACCCGACAGGACTATAAAGATACCAGGCGTTTCCCCCTGGAAGCTCCCTCGTGCGCTCTCCTGTTCCG  
 ACCCTGCCGCTTACCGGATACCTGTCCGCTTTCTCCCTTCGGGAAGCGTGGCGCTTTCTCATAGCTCACGCTGTAGGTATCTC  
 AGTTCCGTGTAGTCTGCTCCAGCTCCAAGCTGGGCTGTGTGCACGAACCCCGTTCAGCCCGACCGCTGCGCCTTATCCGGTAA  
 CTATCGTCTTGAGTCCAACCCGGTAAGACACGACTTATCGCCACTGGCAGCAGCCACTGGTAACAGGATTAGCAGAGCGAGGTA  
 TGTAGGCGGTGCTACAGAGTTCTTGAAGTGGTGGCCTAACTACGGCTACACTAGAAGGACAGTATTTGGTATCTGCGCTCTGCT  
 GAAGCCAGTTACCTTCGGA AAAAGAGTTGGTAGCTCTTGATCCGGCAAACAAACCACCGCTGGTAGCGGTGGTTTTTTGTTTGC  
 AAGCAGCAGATTACGCGCAGAAAAAAGGATCTCAAGAAGATCCTTTGATCTTTTCTACGGGGTCTGACGCTCAGTGAACGAAA  
 ACTCACGTTAAGGGATTTTGGTATGAGATTATCAAAAAGGATCTCACCTAGATCCTTTAAATTA AAAATGAAGTTTTAAATCAA  
 TCTAAAGTATATATGAGTAAACTTGGTGTGACAGTTACCAATGCTTAATCAGTGAGGCACCTATCTCAGCGATCTGTCTATTTTCGT  
 TCATCCATAGTTGCTGACTCCCGTCTGTAGATAACTACGATACGGGAGGGCTTACCATCTGGCCCCAGTGCTGCAATGATA  
 CCGCGAGACCCACGCTCACCGGCTCCAGATTTATCAGCAATAAACCAGCCAGCCGGAAGGGCCGAGCGCAGAAGTGGTCTCTGC  
 AACTTTATCCGCTCCATCCAGTCTATTAATTGTTGCCGGGAAGCTAGAGTAAGTAGTTCGCCAGTTAATAGTTTGCGCAACGTTG  
 TTGCCATTGCTACAGGCATCGTGGTGTACGCTCGTCTTGGTATGGCTTCATTAGCTCCGGTTCCCAACGATCAAGGCGAG  
 TTACATGATCCCCATGTTGTGCAAAAAGCGGTTAGCTCCTTCGGTCTCCGATCGTTGTGCAGAAGTAAGTTGGCCGAGTGT  
 ATCACTCATGTTATGGCAGCACTGCATAATTCTTACTGTATGCCATCCGTAAGATGCTTTTCTGTGACTGGTGTGACTACTCAA  
 CCAAGTCATTCTGAGAATAGTGTATGCGGCGACCGAGTTGCTCTTGCCCGGCGTCAATACGGGATAATACCGCGCCACATAGCA  
 GAACTTTAAAAGTGTCTCATATTGAAAACGTTCTTCGGGGCGAAAACCTCTCAAGGATCTTACCGCTGTTGAGATCCAGTTTCGAT  
 GTAACCACTCGTGACCCAACCTGATCTTCAGCATCTTTACTTTACCAAGCGTTTCTGGGTGAGCAAAAACAGGAAGGCCAAAAT  
 GCCGCAAAAAGGGAATAAGGGCGACAGGAAATGTTGAATACTCAT

2.2.18 Vector 73: 4x(PyI tRNA<sub>UCCU(Ev2)</sub>) PyIRS mCherry-P2A-eGFP(150AGGA)

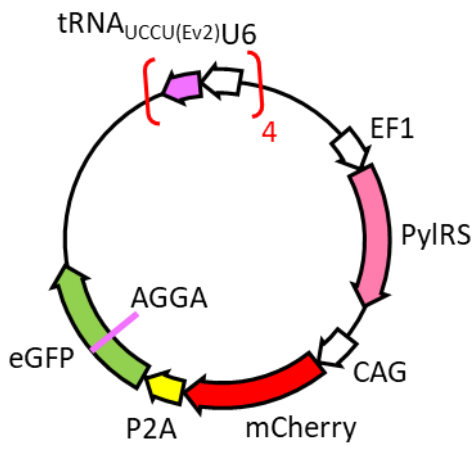

ACTCTTCTTTTTCAATATTATTGAAGCATTTATCAGGGTTATTGTCTCATGAGCGGATACATATTTGAATGTATTTAGAAAAATAA  
 CAAATAGGGGTTCCGCGCACATTTCCCGAAAAGTGCCACCTAAATGTAAGCGTAAATATTTGTTAAAATTCGCGTTAAATTTT  
 GTTAAATCAGCTCATTTTTTAACCATAGGCCGAAAATCGGCAAAAATCCCTTATAAATCAAAAGAATAGACCGAGATAGGGTTGAGT  
 GTTGTCCAGTTTGAACAAGAGTCCACTATTAAGAAGCTGGACTCCAACGTCAAAGGGCGAAAACCGTCTATCAGGGCGAT  
 GGCCCACTAGTGAACCATCACCTAATCAAGTTTTTGGGTCGAGGTGCCGTAAGCACTAAATCGGAACCTAAAGGGAGC  
 CCCCATTAGAGCTTGACGGGGAAAGCCGGCGAACGTGGCGAGAAAGGAAGGGAAAGAAAGCGAAAAGGAGCGGGCGCTAGGG  
 CGCTGGCAAGTGTAGCGGTACGCTGCGGTAACCACCACACCCGCCGCTTAATGCGCCGCTACAGGGCGCGTCCATTC  
 GCCATTCAGGCTGCGCAACTGTTGGGAAGGGCGATCGGTGCGGGCCTTTCGCTATTACGCCAGCTGGCGAAAGGGGGATGT  
 GCTGCAAGGCGATTAAGTTGGGTAACGCCAGGGTTTTCCAGTCACGACGTTGTA AACGACGGCCAGTGAGCGCGCCTCGTT  
 CATTACGTTTTTGAACCGTGGAGGACGGGACGCTCGCGGTGCAAAATGTTTTACAGCGTGATGGAGCAGATGAAGATGCT  
 CGACACGCTGCAGAACACGCACTAGATTAACCCTAGAAAGATAATCATATTGTGACGTACGTTAAAGATAATCATGCGTAAAAT  
 GACGCATGTGTTTTATCGTCTGTATATCGAGGTTATTTAATTTGAATAGATATTAAGTTTTATTATTTACACTTACATACTA  
 ATAATAAATTCAACAAACAATTTATTTATGTTATTTATTTAATAAAAAACAAAACCTCAAAATTTCTTCTATAAAGTAAACAACTT  
 TTATGAGGGACAGCCCCCCCCAAAGCCCCAGGGATGTAATACGTCCCTCCCCGCTAGGGGGCAGCAGCGAGCCGCCCC  
 GGGCTCCGCTCCGGTCCGGCTCCCCCGCATCCCCGAGCCGGCAGCGTGCGGGACAGCCGGGCACGGGGAAGGTGG  
 CACGGGATCGTTTTCTTCAACGCTTCTCGTCTTTCAGCCTGCAGACACCTGGGGGATACGGGGAAGGCCCTTTAA  
 GAAAACCGCACTTGTCCGGAAACCCGGGAATCTAACCCGGCTGAAGCGGATAGGAAGCCCTTCGATCTACATGATCAGG  
 TTTCCGGTGTTCGTCTTTCCACAAGATATATAAGCCAAAGAAATCGAAATACTTTCAAGTTACGGTAAGCATATGATAGTCCATT  
 TTA AACATAATTTAAAAGTCAAACTACCAAGAAATTTACTTTCTACGTCACGATTTTTGACTAATATCTTTGTGTTACAG

TCAAATTAATTCTAATTATCTCTCTAACAGCCTTGTATCGTATATGCAAATATGAAGGAATCATGGGAAATAGGCCCTTCTCTGCC  
CAATCGACGAACCTGTGGCCGTTTACCCTCTTAAGAAAAACCGCACTTGTCC**CGGAAACCCCGGGAATCTAACCCGGCTGAAGC**  
**GGATAGGAAGCCCTTCGATCTACATGATCAGTTTTCC**GGTGTTCGTCTTTCCACAAGATATATAAGCCAAGAAATCGAAAT  
ACTTTCAAGTTACGGTAAGCATATGATAGTCCATTTTAAAACATAATTTTAAAACACTGCAAACACTACCCAAGAAATATTACTTTCTACG  
TCACGTATTTTGTACTAATATCTTTGTGTTACAGTCAAATTAATTCTAATTATCTCTCTAACAGCCTTGTATCGTATATGCAAATAT  
GAAGGAATCATGGGAAATAGGCCCTTCTCTGCCAAATTCGGCAAGTTCTCCACCAGCCTCTTAAGAAAAACCGCACTTGTCC**CG**  
**GAAACCCCGGGAATCTAACCCGGCTGAAGCGGATAGGAAGCCCTTCGATCTACATGATCAGTTTTCC**GGTGTTCGTCTTT  
CCACAAGATATATAAGCCAAGAAATCGAAATCTGAAATACTTTCAAGTTACGGTAAGCATATGATAGTCCATTTTAAAACATAATTTTAAAAC  
TGCAAACACTACCCAAGAAATATTACTTTCTACGTACGTTATTTGTTACTAATATCTTTGTGTTTACAGTCAAATTAATTCTAATTATC  
TCTCTAACAGCCTTGTATCGTATATGCAAATATGAAGGAATCATGGGAAATAGGCCCTTCTCTGCCAACTCTTAAGAAAAACCG  
GCACTTGTCCCTAAAACCGCACTTGTCC**CGGAAACCCCGGGAATCTAACCCGGCTGAAGCGGATAGGAAGCCCTTCGATCTA**  
**CATGATCAGTTTTCC**GGTGTTCGTCTTTCCACAAGATATATAAGCCAAGAAATCGAAATACTTTCAAGTTACGGTAAGCATAT  
GATAGTCCATTTTAAAACATAATTTTAAAACACTACCCAAGAAATTAATTACTTTTCTACGTACGTTATTTGTTACTAATATCTT  
TGTGTTTACAGTCAAATTAATTCTAATTATCTCTCTAACAGCCTTGTATCGTATATGCAAATATGAAGGAATCATGGGAAATAGGCC  
CTTCTCTGCCAAACCGGTTGCGATCGCTCCGGTGCCCGTCACT**GGGCAGAGCGCACATCGCCACAGTCCCGGAGAAGTTGG**  
**GGGGAGGGGTGGCAATTGAACGGGTGCCTAGAGAAGGTGGCGCGGGGTAAACTGGGAAAGTGATGTCGTGACTGGCTCCG**  
**CCTTTTTCCCGAGGGTGGGGGAGAACCGTATATAAGTGCAGTAGTCGCCGTGAACGTTCTTTTTCGCAACGGGTTTGCCGCCAG**  
**AACAGCTGAAGCTTCGAGGGGCTCGCATCTCTCTCACGCGCCCGCCCTACCTGAGGCCCATCCACGCGGTTGA**  
**GTCCGCTTCTGCCCTCCCGCTGTGGTGCCTCTCTGCTCCGCGCTAGGTAAGTTTAAAGCTCAGGTCGAGACCG**  
**GGCCTTTGTCCGGCGCTCCCTTGAGCCTACCTAGACTCAGCCGGCTCTCCACGCTTTGCCTGACCCTGCTTGTCAACTCTAC**  
**GTCTTTGTTTCTGTTTCTGTTCTGCGCCGTTACAGATCCAAGCTGTGACCGCGCCTACTCTACAGATAGCGTTTAAACTTACGCT**  
**TGCCACCATGGCTAGCGACTCAAGGACGACGACGACAAGGACAAGAAGCCCTGAACACCTGATCAGCGCCACAGGACT**  
**GTGGATGCCAGAACCCGACCATCCACAAGATCAAGCACCACGAGGTGTCCCGTCCAAAATCTACATCGAGATGGCTCTG**  
**GCATGTCTGCCCTGTGCAAGCCTCTGCCAGCCCTGACCAAGTCCAGACCCGACCCGCTGGAAGTCTCTGTAACCCAA**  
**GGACGAGATCAGCCTGAACAGCGGCAAGCCCTTCCGGGAGCTGGAAGCGAGCTGCTGAGCCGGGAAGAAGGACCTCC**  
**AGCAAATCTACGCCGAGGAACGGGAGAACTACCTGGGCAAGCTGGAAGAGAGATCACCCGGTCTTCTGTTGACCGGGCT**  
**TCCTGGAATCAAGAGCCCATCTGATCCCTGGAGTACATCGAGCGGATGGGCATCGACAACGACCCGAGCTGAGCA**  
**AGCAGATTTCCGGGTGGACAAGAACTTCTGCCTGCGGCCATGCTGGCCCCAACCTGTACAACCTCTGCGGAACTGGA**  
**TCGGCTCTGCCGACCCCATCAAGATTTTCGAGATCGGCCCTGCTACCGGAAAGAGAGCGACGGCAAGAGCACCTGGA**  
**AGAGTTTACAATCTGAACCTTTTCCAGATGGGACGCGCTGACCCAGAGAGAACCTGGAATCCATCATCACCAGCTTTCTGA**  
**ACCACCTGGGGATCGACTTCAAGATCGTGGGCGACAGCTGCATGGTGTACGGCGACACCCTGGACGTGATGCACGGCGACC**  
**TGGAAGTGTCTAGCGCCGTCGTGGGACCCATCCCTTGGACCGGGAGTGGGGCATCGATAAGCCCTGGATCGGAGCCGGCT**  
**TCGGCTGGAACGGCTGCTGAAAGTCAAGCAGCACTTAAAGAACATCAAGCGGGCTGCCAGAAGCGAGAGCTACTACAACG**  
**GCATCAGCAACCACTGTGATGATAAGGATCCACTAGTCCAGTGTGGTAATTGACATTGATTATGACTAGTTATTAATAGTA**  
**ATCAATACGGGGTCATTAGTTTAAAGCCATATATGGAGTTCCCGCTTACATAACTTACGGTAAATGACCCCGCTGGCTGACCG**  
**CCCAACGACCCCGCCATTGACGTCAATAATGACGTATGTTCCCATAGTAACGCCAATAGGGACTTTCCATTGACGTCAATGGG**  
**TGGAGTATTTACGGTAAACTGCCCACTTGGCAGTACATCAAGTGTATCATATGCCAAGTACGCCCCCTATTGACGTCAATGACGG**  
**TAAATGGCCCGCCTGGCATTATGCCCAGTACATGACCTTATGGGACTTTCTACTTGGCAGTACATCTACGTATTAGTCATCGCT**  
**ATTACCATGGTTCGAGGTGAGCCCCACGTTCTGCTTCACTCTCCCATCTCCCCCTCCCAACCCCAATTTTGTATTTATTTAT**  
**TTTTAATTATTTGTGACGAGTATGGGGGCGGGGGGGGGGGGGGGGGGGGGGGGGGGGGGGGGGGGGGGGGGGGGGGGGGG**  
**GGCGGGGGGAGGCGGAGAGGTGCGGCGGCGAGCCAATCAGAGCGGCGCGCTCCGAAAGTTTCTTTTATGGCGAGGCGGGCGG**  
**CGGCGGCGGCCCTATAAAAAGCGAAGCGCGGGCGGGGGGGGAGTCCGCTGCGTTGCTTCCGCCCGTCCCGGCTCCGCGCC**  
**GCCTCGCGCGCCCGCCCGGCTCTGACTGACCGCTTACTCCACAGGTGAGCGGGCGGGACGGCCCTTCTCTCCGGGGCT**  
**GTAATTAGCGCTTGGTTAATGACGGCTCGTTTCTTTCTGTGGCTGCGTGAAGCCCTTAAAGGGCTCCGGGAGGGGCCCTTTGT**  
**CGGGGGGGGAGCGGCTCGGGGGTGCCTGCTGTGTGTGCTGCTGGGAGCGCCGCTGCGGCCCGCTGCCGCGCGG**  
**TGTGAGCGCTGCGGCGCGGGCGGGCTTTGTGCGCTCCGCTGTGCGCAGGGGAGCGCGGGGGGGGGGGGGGGGGGGGGGGGG**  
**CGGTGCGGGGGGGGCTGCGAGGGGAACAAAGGCTGCGTGCGGGGTGTGTGCGTGGGGGGGTGAGCAGGGGGGTGTGGGCGCG**  
**GCGGTGCGGCTGTAACCCCGCCCTGCACCCCGCTCCCGAGTTGCTGAGCACGGCCCGGCTTCCGGTGCGGGGCTCCGTACG**  
**GGGCGTGGCGCGGGGCTCGCCGTGCCGGGCGGGGGGTGGCGGCAGGTGGGGGTGCCGGGCGGGGGCGGGGCCCGCTCGGG**  
**CCGGGGAGGGCTCGGGGGAGGGGCGCGGCGGCCCGGAGCGCCGGCGGCTGTGAGGCGCGGCGAGCCGAGCCATTG**  
**CCTTTTATGGTAATCGTGCAGAGAGGGCGAGGGACTTCTTTGTCCAAATCTGTGCGGAGCCGAAATCTGGGAGGCGCGCGG**  
**GCACCCCTCTAGCGGGCGCGGGGCGAAGCGGTGCGGCGCCGGCAGGAAGGAAATGGGCGGGGAGGGCCTTCTGTGCGTCCG**  
**CCGCGCGCGCTCCCTTCTCCCTCTCCAGCCTCGGGGCTGTCCGCGGGGGGACGGCTGCCTTCCGGGGGGACGGGGCAGG**  
**GCGGGGTTCCGGCTTCTGCGTGTGACCGCGGGCTCTAGAGCCTCTGCTAACCATGTTTCATGCCTTCTTCTTTTCTTCTACAGCTC**  
**CTGGGCAACGTCGTGGTTATTGTGCTGTCTCATATTTTGGCAAAGAATTCGCCACC**ATGGTGAGCAAGGGCGAGGAGGATAA****  
**CATGGCCATCATCAAGGAGTTTCATGCGCTTCAAGGTGCACATGGAGGGCTCCGTGAACGGCCACGATTCGAGATCGAGGG**  
**CGAGGGCGAGGGCCGCCCTACGAGGGCACCCAGACCGCCAAGCTGAAGGTGACCAAGGGTGGCCCCCTGCCCTTCGCT**  
**GGGACATCCTGTCCCTCAGTTTATGTACGGCTCCAAGGCTACGTGAAGCACCCCGCGACATCCCGACTACTTGAAGCT**  
**GTCCTTCCCGGAGGGCTTCAAGTGGGAGCGCGTGTGAACCTTCGAGGACGGCGCGTGGTGAACCGTGAACCGAGGACTCCTC**  
**CCTGCAGGACGGCGAGTTTCAATCAAGGTGAAGCTGCGCGGACCAACTTCCCTCCGACGGCCCCGTAATGCAGAAGAA**  
**GACCATGGGCTGGAGGGCTCTCCGAGCTGATACCCGAGGACCTGACCCCTGAAGGGCGAGATCAAGCGAGGGCTGA**  
**AGCTGAAGGACGGCGCCACTACGAGCTGAGTCAAGACCCTACAAGGCCAAGAAGCCGCTGCAGCTGCCCGGCGCT**  
**ACAACGTCAACATCAAGTTGACATCACCTCCACAACGAGGACTACCCATCGTGAACAGTACGAACGCGCGGAGGGCC**  
**GCCACTCCACCGGGCGCATGGACGAGCTGTACGCGTCTGGAGGC**GCCACCAATTTAGCCTGCTGAAACAGGCTGGCGAGC****  
**TGGAAGAGAACCCTGGACCTGGACAAAAGTCCGTGAGCAAGGGCGAGGAGCTGTTACCCGGGGTGGTGGCCATCCTGGTCCG**  
**AGCTGAGCGCGCAGCTAAACGGCCACAAGTTCAAGCTGCGCGTCCGGCAGGGCGAGGGCGATGCCACCTACGGCAAGCTGACC**  
**CTGAAGTTCTGACCAACCGCAAGCTGCCGTGCCCTGGCCACCCCTGCTGACCACCTGACCTACCGCGTGCAGTGTCT**  
**TCAGCCGCTACCCCGACCACATGAAGCAGCAGACTTCTTCAAGTCCGCCATGCCGAAGGCTACGTCCAGGAGCGCACCAT**  
**CTTCTCAAGGACGACGGCAACTACAAGACCCGCGCGGAGGTGAAGTTGAGGGCGACACCCTGGTGAACCGCATCGAGCT**

GAAGGGCATCGACTTCAAGGAGGACGGCAACATCTGGGGCACAAAGCTGGAGTACAACACAGCCACAGGAGTCTATA  
 TCATGGCCGACAAGCAGAAGAACGGCATCAAGGTGAACCTTCAAGATCCGCCACAACATCGAGGACGGCAGCGTGCAGCTCG  
 CCGACCACTACCAGCAGAACACCCCATCGGGCAGCGCCCGTCTGCTGCTGCCGACAACCACTACCTGAGCACCCAGTCCG  
 CCCTGAGCAAAGACCCCAACGAGAAGCGCGATCACATGGTCTGCTGGAGTTCGTGACCGCCGCGGGGATCACTCTCGGCA  
 TGGACGAGCTGTACAAGTAA GAATTCCTCCTCAGGTGCAGGCTGCCTATCAGAAGGTGGTGGCTGGTGTGGCCAATGCCCTG  
 GCTCACAAATACCACTGAGATCTTTTTCCCTCTGCCAAAAATATGGGGACATCATGAAGCCCTTGAGCATCTGACTTCTGGCTA  
 ATAAAGGAAATTTATTTTCATTGCAATAGTGTGTTGGAATTTTTGTGTCTCTCACTCGGAAGGACATATGGGAGGGGTCGACAAT  
 CAACCTCTGGATTACAAAATTTGTGAAAGATTGACTGGTATTCTTAACTATGTTGCTCCTTTTACGCTATGTGGATACGCTGCTTTA  
 ATGCCTTTGTATCATGCGTTAACTAACTTGTATTGCGACTTATAATGGTTACAAATAAAGCAATAGCATCACAAATTTACAAA  
 TAAAGCATTTTTTCTACTGCATTCTAGTTGTGGTTTGTCCAACTCATCAATGTATCTTATCATGTCTGGAATTGACTCAAATGATG  
 TCAATTAGTCTATCAGAAGCTATCTGGTCTCCCTTCCGGGGGACAAGACATCCCTGTTTAAATTTAAACAGCAGTGTTCCTCAAAC  
 TGGGTTCTTATACCTTGTCTGGTCAACCAGGTTGCAGGGTTTCTGTCTCACAGGAACGAAGTCCCTAAAGAAACAGTGGC  
 AGCCAGTTTATAGCCCCGGAATTGACTGGATTCCCTTTTTAGGGCCCATGGTATGGCTTTTTCCCGTATCCCCCAGGTGCTG  
 CAGGCTCAAAGAGCAGCGAGAAGCGTTTCAAGAGAAAGCGATCCCGTGCCACCTTCCCCGTGCCCGGGCTGTCCCCGCACGCT  
 GCCGGCTCGGGGATGCGGGGGGAGCGCCGACCGGAGCGGAGCCCCGGGCGGCTCGCTGCTGCCCCCTAGCGGGGGAGGG  
 ACGTAATTACATCCCTGGGGGCTTTGGGGGGGGGCTGTCCCTGATATCTATAACAAGAAAAATATATATAAATAGTTATCACGTA  
 AGTAGAACATGAAATAACAATATAATTCGTATGAGTTAAATCTTAAAAGTCACGTA AAAAGATAATCATGCGTCATTTTGACTCAC  
 GCGGTGCTTATAGTTCAAAATCAGTGACACTTACCGCATTGACAAGCAGCGCTCACGGGAGCTCCAAGCGCCGACTGAGATGTC  
 CTAATGCACAGCGACGGATTCCGCGCTATTTAGAAAGAGAGAGCAATAATTTCAAGAATGCATGCGTCAATTTTACGCAGACTATC  
 TTTCTAGGGTAACTAGCTGCATCAGGATCATATCGTCCGGTCTTTTTTCCGGCTCAGTCATCGCCCAAGCTGGCGCTATCTGG  
 GCATCGGGGAGGAAGAAGCCCGTGCCTTTTCCCGCAGGTTGAAGCGGCATGGAAAGAGTTTGCAGGATGACTGCTGCTGC  
 ATTGACGTTGAGCGAAAACGCACGTTTACCATGATGATTCCGGGAAGGTGTGGCCATGCACGCCTTAAACGGTGAAGTGTTCGTT  
 CAGGCCACCTGGGATACCAAGTTCGTCGCGGCTTTTCCGGACACAGTTCGGATGGTCAGCCCCGAAGCGCATCAGCAACCCGAA  
 CAATACCGGCAGCAGCCGGAATTCGCGTCCCGTGTGCGAGTTAATGACAGCGGTGCCGGCTGGGATATTACGTCAGCGAG  
 GACGGGTATCCTGGCTGGATGCCGAGAAATGGACATGGATACCCCGTGAAGTACCCGGCGGGCGCGCTTGGCGTAATCATGG  
 TCATAGCTGTTTCTGTGTGAAATTGTTATCCGCTCACAATCCACACAACATACGAGCCGGAAGCATAAAGTGTAAAGCCTGGG  
 GTGCCTAATGAGTGAGCTAACTCACATTAATTGCGTTGCGCTCACTGCCCGCTTTCCAGTCGGGAAACCTGTGCTGCCAGCTGC  
 ATTAATGAATCGGCCAACCGCGCGGGGAGAGGCGGTTTTCGTTATGGGCGCTCTTCCGCTTCTCGCTCACTGACTCGTCTGCGC  
 TCGGTGTTCCGGCTGCGGCGAGCGGTATCAGCTCACTCAAAGCGGTAAATACGGTTATCCACAGAATCAGGGGATAACGCAGG  
 AAAGAACATGTGAGCAAAAAGGCCAGCAAAAAGGCCAGGAACCGTAAAAAGGCCGCTTGTGCGTTTTTCCATAGGCTCCGCC  
 CCCCTGACGAGCATCACA AAAATCGACGCTCAAGTCAGAGGTGGCGAAACCCGACAGGACTATAAAGATACCAGGCGTTTTCCCC  
 CTGGAAGCTCCCTCGTGCCTCTCCTGTTCCGACCCTGCCGTTACCGGATACCTGTCCGCTTTCTCCCTTCGGGAAGCGTGG  
 CGTTTTCTCATAGCTCACGCTGTAGGTATCTCAGTTCGGTGTAGGTGCTTCCGCTCCAAGCTGGGCTGTGTGCACGAACCCCCCG  
 TTCAGCCGACCGCTGCGCTTATCCGGTAACATCGTCTTGTAGTCCAACCCGGTAAGACACGACTTATCGCCACTGGCAGCAG  
 CCACTGGTAACAGGATTAGCAGAGCGAGGTATGTAGGCGGTGCTACAGAGTTCTTGAAGTGGTGGCCAACTACGGCTACACTA  
 GAAGGACAGTATTTGGTATCTGCGCTCTGCTGAAGCCAGTTACCTTCGGA AAAAGAGTTGGTAGCTCTTGATCCGGCAAACAAC  
 CACCGCTGGTAGCGGTGGTTTTTTTTGTTTGAAGCAGCAGATTACGCGCAGAAAAAAGGATCTCAAGAAGATCCTTTGATCTTT  
 TCTACGGGGTCTGACGCTCAGTGAACGAAAACCTCACGTTAAGGGATTTTGGTCAATGAGATTATCAAAAAGGATCTTACCTAGA  
 TCCTTTTAAATTA AAAATGAAGTTTTAAATCAATCTAAAATATATAGTAACTTGGTCTGACAGTTACCAATGCTTAATCAGTGA  
 GGCACCTATCTCAGCGATCTGTCTATTTGTTTCATCCATAGTTGCCTGACTCCCCGTCGTGTAGATAACTACGATACGGGAGGGC  
 TTACCATCTGGCCCCAGTGTGCAATGATACCGCGAGACCCACGCTCACCGGCTCCAGATTTATCAGCAATAAACCAGCCAGCC  
 GGAAGGGCCGAGCGCAGAAGTGGTCTGCAACTTTATCCGCTCCATCCAGTCTATTAATTGTTGCCGGAAGCTAGAGTAAGT  
 AGTTCGCCAGTTAATAGTTTGCACAACGTTGTTGCCATTGCTACAGGCATCGTGGTGTACAGCTCGTCTGTTGGTATGGCTTCAT  
 TCAGCTCCGGTTCCCAACGATCAAGCGAGTTACATGATCCCCATGTTGTGCAAAAAAGCGGTTAGCTCCTTCGGTCTCCGA  
 TCGTTGTGAGAAAGTTGGCCGAGTGTATCACTCATGGTTATGGCAGCACTGCATAATTTCTTACTGTCATGCCATCCGTA  
 AGATGCTTTTCTGTGACTGGTACTCAACCAAGTCAATTCTGAGAATAGTGTATGCGGCGACCGAGTTGCTCTTGCCCGGCGT  
 CAATACGGGATAATACCGCGCCACATAGCAGA ACTTTAAAAGTGTCTCATCATTGAAAACGTTCTTCGGGGCGAAAACCTCTCAAG  
 GATCTTACCGCTGTTGAGATCCAGTTTCGATGTAACCCACTCGTGCACCCA ACTGATCTTCAGCATCTTTACTTTACCAGCGTTT  
 CTGGGTGAGCAAAAACAGGAAGGCAAAAATGCCGCAAAAAGGGGAATAAGGGCGACACGGAAATGTTGAATACTCAT

**2.2.19 Vector 74: 4x(Tyr tRNA<sub>CUA</sub>) TyrRS\* mCherry-P2A-eGFP(150TAG)**

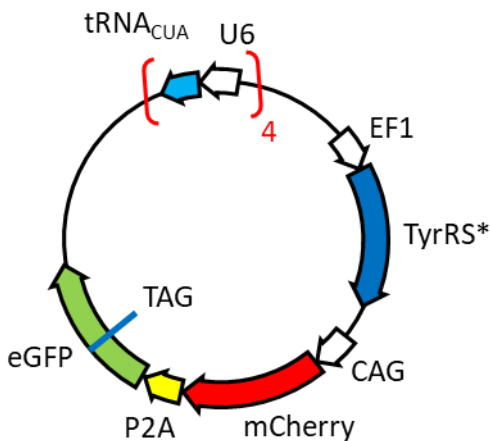

ACTCTTCTTTTTCAATATTATTGAAGCATTTATCAGGGTTATTGTCTCATGAGCGGATACATATTTGAATGTATTGAAAAATAA  
 CAAATAGGGGTTCCGCGCACATTTCCCCGAAAAGTGCCACCTAAATTTGAAGCGTTAATATTTTGTAAAATTCGCGTTAAATTTTT  
 GTTAAATCAGCTCATTTTTTAAACCAATAGGCCGAAATCGGCAAAAATCCCTTATAAATCAAAAAGAAATAGACCGAGATAGGGTTGAGT  
 GTTGTCCAGTTTGAACAAGAGTCCACTATTAAGAACGTGGACTCCAACGTCAAAGGGCGAAAAACCGTCTATCAGGGCGAT

GGCCCACTACGTGAACCATCACCTAATCAAGTTTTTTGGGGTCGAGGTGCCGTAAGCACTAAATCGGAACCCCTAAAGGGAGC  
CCCCGATTTAGAGCTTGACGGGGAAAGCCGGCGAACGTGGCGAGAAAGGAAGGGAAAGAAAGCGAAAGGAGCGGGCGCTAGGG  
CGCTGGCAAGTGTAGCGGTACAGCTGCGCGTAACCACCACACCCGCCGCGCTTAATGCGCCGCTACAGGGCGCGTCCCATTC  
GCCATTCAGGCTGCGCAACTGTTGGGAAGGGCGATCGGTGCGGGCCTCTTCGCTATTACGCCAGCTGGCGAAAGGGGGATGT  
GCTGCAAGGGGATTAAGTTGGGTAACGCCAGGGTTTTCCAGTCACGACGTTGTAACACGACGGCCAGTGAGCGCGCCTCGTT  
CATTACGTTTTTTGAACCCGTGGAGGACGGGCAGACTCGCGGTGCAAAATGTGTTTTACAGCGTGATGGAGCAGATGAAGATGCT  
CGACACGCTGCAGAACCGCAGCTAGATTAACCCTAGAAAGATAATCATATTGTGACGTACGTTAAAGATAATCATCGTAAAATT  
GACGCATGTGTTTTATCGTCTGTATATCGAGGTTTATTTATTTAATTTGAATAGATATTAAGTTTTATTATATTTACACTTACATA  
ATAATAAATTCAACAAACAATTTATTTATGTTTATTTATTTAATAAAAAACAACAACTCAAAATTTCTTCTATAAAAGTAACAAA  
TTATGAGGGACAGCCCCCCCCAAAGCCCCAGGGATGTAATTACGTCCCTCCCCCGCTAGGGGGCAGCAGCGAGCCGCCCG  
GGGCTCCGCTCCGGTCCGCGCTCCCCCGCATCCCCGAGCCGGCAGCGTGCGGGGACAGCCCGGGCAGGGGAAGGTGG  
CACGGGATCGCTTTCCTGACCGCTTCTCGCTGCTTTGAGCCTGCAGACACCTGGGGGGATACGGGGAAAGGGCCTTTAA  
GAAAACCGCACTTGCT**TGGTGGGGGAAGGATTCGAACCTTCGAAGTCTGTGACGGCAGATTAGAGTCTGCCCTTTGGC**  
**GCTCGGGAACCCACC**GGTGTTC**GTCTTTCCACA**AGATATATAAAGCCAAAGAAATCGAAATACTTTCAAGTTACGGTAAGCAT  
ATGATAGTCCATTTTAAAACATAATTTTAAAACGCAAACCTACCCAAGAAATTTACTTTCTACGTCACGTATTTTGTACTAATATC  
TTTGTGTTTACAGTCAAATTAATTCTAATTATCTCTCTAACAGCCTTGATCGTATATGCAAATATGAAGGAATCATGGAAATAGG  
CCCTCTTCTGCCCAATCGACGAACCTTGCGCCGTTAACCTCTTAAGAAAACCGCACTTGCT**TGGTGGGGGAAGGATTCGAA**  
**CCTCGAAGTCTGTGACGGCAGATTAGAGTCTGCTCCCTTTGGCCGCTCGGGAACCCACC**GGTGTTC**GTCTTTCCACA**  
GATATATAAAGCCAAAGAAATCGAAATACTTTCAAGTTACGGTAAGCATATGATAGTCCATTTTAAAACATAATTTTAAAACGCAA  
CTACCCAAGAAATTTACTTTCTACGTCACGTATTTTGTACTAATATCTTTGTGTTTACAGTCAAATTAATTCTAATTATCTCTCTAA  
CAGCCTTGATCGTATATGCAAATATGAAGGAATCATGGAAATAGGCCCTTTCCTGCCCAATTCGGCAAGTTCTCCACCAGCC  
TCTTAAGAAAACCGCACTTGCT**TGGTGGGGGAAGGATTCGAACCTTCGAAGTCTGTGACGGCAGATTAGAGTCTGCTCCCTT**  
**TGGCCGCTCGGGAACCCACC**GGTGTTC**GTCTTTCCACA**AGATATAAAGCCAAAGAAATCGAAATACTTTCAAGTTACGGTA  
AGCATATGATAGTCCATTTTAAAACATAATTTTAAAACGCAAACCTACCCAAGAAATTTACTTTCTACGTCACGTATTTTGTACTA  
ATATCTTTGTGTTTACAGTCAAATTAATTCTAATTATCTCTCTAACAGCCTTGATCGTATATGCAAATATGAAGGAATCATGGAA  
ATAGGCCCTTTCCTGCCCAACCTTAAAGAAAACCGCACTTGCTCCCTAAAACCGCACTTGCT**TGGTGGGGGAAGGATTCGA**  
**ACCTTCGAAGTCTGTGACGGCAGATTAGAGTCTGCTCCCTTTGGCCGCTCGGGAACCCACC**GGTGTTC**GTCTTTCCACA**  
AGATATAAAGCCAAAGAAATCGAAATACTTTCAAGTTACGGTAAGCATATGATAGTCCATTTTAAAACATAATTTTAAAACGCAA  
ACTACCCAAGAAATTTACTTTCTACGTCACGTATTTTGTACTAATATCTTTGTGTTTACAGTCAAATTAATTCTAATTATCTCTCTA  
ACAGCCTTGATCGTATATGCAAATATGAAGGAATCATGGAAATAGGCCCTTTCCTGCCCAACCGTTGCGATCGCTCCGGT  
GCCGTCAGTGGGCAGAGCGCACATCGCCACAGTCCCGGAGAAGTTGGGGGGAGGGTCCGGCAATTGAACGGGTGCCTAGA  
GAAGGTGGCGCGGGGTAAACTGGGAAAGTGATGTCGTGACTGGCTCCGCCTTTTTCCCGAGGGTGGGGGAGAACCGTATATA  
AGTGCAGTAGTCCGCCGTAACGTTCTTTTTCCGAACGGGTTTCCCGCCAGAACACAGCTGAAGCTTCGAGGGGCTGCATCTCT  
CCTTACGCGCCCGCCCTACCTGAGCCGCCATCCAGCCGGTGTAGTCCGCTTTCGCGCTCCGCTCCGCTGTTGGTGCCT  
CCTGAAGTGCCTCCGCTAGGTAAAGTTAAAGCTCAGGTCAGGACGGCCGCTTTGTCGGGCTCCCTTTGGAGCCTACCTA  
GACTCAGCCGGCTCTCCACGCTTGCCTGACCCTGCTTGTCACTACGCTTTGTTTCTGTTCTGCGCCGTTACAG  
ATCCAAGCTGTGACCGGCGCCTACTCTACAGATAGCGTTTAAACTTACGCTTGCCACC**ATGGCTAGCGACTACAAGGACGAGC**  
**ACGACAAGGCAAGCAGTAACCTTGATTAACAATTGCAAGAGCGGGGGCTGGTAGCCAGGTGACGGACGAGGAAGCGTTAG**  
**CAGAGCAGTGGCGAAGGCCGCTGACGCTCGTGTGGTCTGCATCTACCGCTGACAGCTTGCAATTTGGGCATCTTGT**  
**CCATTGTTATGCTGAAACGCTTCCAGCAGCGCCGCAAGCCGGTTGCGCTGGTAGGCGCGCAGCGGCTGATTGGC**  
**GACCCGAGCTTCAAAGCTGCCGAGCGTAAGCTGAACACCGAAGAACTGTTCAAGGAGTGGGTGGACAAAATCCGTAAGCAG**  
**GTTGCCCGTTCCTCGATTCGACTGTGGAGAAAACCTGCTATCGCGCCAATAATTATGACTGGTTCGGCAATATGAATGT**  
**GCTGACCTTCTGCGGATATTGGCAAACACTTCTCCGTTAACAGATGATCAACAAAGAAGCGGTTAAGCAGCGTCTCAACC**  
**GTGAAGTACAGGGATTTTCGTTACTGAGTTTTCTACAACCTGCTGACGGGTTATAGTATGGCCTGTTGAACAAACAGTAC**  
**GGTGTGGTCTGCAAATTTGGTGTCTGACCAGTGGGTAACTCACTCTGTTATCGACTGACCTGACCTGCTGATCGAGAA**  
**TCAGGTGTTTGGCCTGACCGTTCGCTGATCACTAAGGACAGATGGCACCATAATTTGGTAAAACGAAAGCGCGCATCTGG**  
**TTGGATCCGAAGAAAACAGCCCGTACAAATTTCTACCAGTTCTGGATCAACACTGCGCGTCCGACGTTTACCGCTTCTGAA**  
**GTTCTTACCTTTATGAGCATTGAAGAGATCAACGCCCTGGAAGAAGAAGATAAAAACAGCGGTAAGCACCAGCGCGCCAG**  
**TATGACTGGCGGAGCAGGTGACTCGTCTGGTTCACGGTGAAGAAGGTTTACAGGCGGCAAAACGTTATTACCGAATGCCTGT**  
**TCAGCGTCTTTGAGTGCCTGAGTGAAGCGGACTCGAACAGCTGGCGCAGGACGGCGTACCGTGGTGGATGGGTA**  
**GGGCGACCTGATGCAGGCACTGGTCACTGAACTGCAACCTTCCCGTGGTCAAGCAGTAAAACATCGCCTCCAAT**  
**GCCATCACCATTAACGGTGA AAAACAGTCCGATCCTGAATACTTCTTTAAGAAGAAGATCGTCTGTTGGTCTGTTTACCTTA**  
**CTGCGTCCGGTAAAAGAATTACTGTCTGATTTGCTGGAAGGGCCCGTTAA**TGATAAGGATCCACTAGTCCAGTGTGGTG  
GAATTGACATTGATTATTGACTAGTTATTAATAGTAATCAATTACGGGGTCATTAGTTTCATAGCCCATATATGGAGTTCGCGGTTAC  
ATAACTTACGGTAAATGGCCCGCTGGCTGACCGCCCAACGACCCCGCCCATTTGACGTCAATAATGACGTATGTTCCCATAGT  
AACGCCAATAGGGACTTTCCATTGACGTCAATGGGTGGAGTATTTACGGTAAACTGCCACTTGGCAGTACATCAAGTGTATCAT  
ATGCCAAGTACGCCCCCTATTGACGTCAATGACGGTAAATGGCCCGCTGGCATTATGCCAGTACATGACCTTATGGGACTTTT  
CTACTTGGCAGTACATCTACGTATTAGTCATCGCTATTACCATGGTCGAGGTGAGCCCCACGTTCTGCTTCACTCTCCCATCTC  
CCCCCCTCCCCACCCCAATTTTGTATTTATTTTAAATTTTGTGTCAGCGATGGGGCGGGGGGGGGGGGGGGGGCGCG  
CGCCAGGCGGGGCGGGGCGGGGCGAGGGGCGGGGCGAGGCGGAGAGGTGCGGCGCGCAGCCAAATCAGAGCGGGCG  
GCTCCGAAAGTTTCTTTTATGGCGAGGCGGGCGGGCGGGCGCCCTATAAAAAGCCGAAGCGCGCGGGCGGGGAGTCTGCT  
GCGTTGCCCTTCCGCGCTGCCCGCTCCGCGCCGCTCGCGCCGCGCCCGCCCGGCTCTGACTGACCGCGTTACTCCACAGG  
TGAGCGGGCGGGACGGCCCTTCTCCTCCGGGCTGTAATTAGCGCTTGGTTAATGACGGCTCGTTTCTTTTCTGTGGCTGCGTG  
AAAGCCTTAAAGGGCTCCGGGAGGGCCCTTTGTGCGGGGGGAGCGGCTCGGGGGGTGCGTGCCTGTGTGTGCGTGGGG  
AGCGCCGCTGCGGCCCGCGCTGCCCGCGGCTGTGAGCGCTGCGGGCGCGGCGCGGGGCTTTGTGCGCTCCGCGGTGTC  
GCGAGGGGAGCGCGCGGGGGCGGTGCCCGCGGTGCGGGGGCTGCGAGGGGAACAAAGGCTGCTGCGGGGTGTGT  
GCGTGGGGGGTGAGCAGGGGTGTGGCGCGGGCGGTGCGGCTTAACCCCGCTGCAACCCCGTCCCGAGTTGCTGAG  
CACGGCCCGGCTTCGGGTGCGGGGCTCCGTACGGGGCGTGGCGCGGGGCTCGCGTGCCGGGCGGGGGTGGCGGCAGGT  
GGGGGTGCCGGGCGGGGCGGGGCCGCTCGGGCCGGGAGGGCTCGGGGAGGGGCGCGCGGCCCGGAGCGCCGG  
CGGCTGTGAGGCGCGGCGAGCCGACGCACTTCTTTATGTTAATCGTGCGAGAGGGGCGCAGGGACTTCTTTTCCCAA  
TCTGTGCGGAGCCGAATCTGGGAGCGCCCGCACCCCTTAGCGGGCGGGGCGGAGCGGCGGGCGAGGAGGAGG  
AGGAAATGGGCGGGAGGGGCTTCTGCTGCGCGCGCCCGCTCCCTTCTCCCTCCAGCCTCGGGGCTGCGCGGG  
GGGACGGCTGCCTTCCGGGGGACGGGGCAGGGCGGGGTTGCGCTTCTGGCGTGTGACCGGCGGCTCTAGAGCCTCTGCTA  
ACCATGTTTCATGCCTTCTTCTTTTCTACAGCTCCTGGCAACGTGCTGGTTATTGTGCTGTCTCATATTTGGCAAAGAATTC

GCCACCATGGTGAGCAAGGGCGAGGAGGATAACATGGCCATCATCAAGGAGTTTCATGCGCTTCAAGGTGCACATGGAGGGC  
TCCGTGAACGGCCACGAGTTGAGATCGAGGGCGAGGGCGAGGGCCGCCCTACGAGGGCACCCAGACCGCCAAGCTGAA  
GGTGACCAAGGGTGGCCCCCTGCCCTTCGCTGGGACATCTGTCCCCTCAGTTTCATGTACGGCTCCAAGGCTACGTGAAG  
CACCCCGCCGACATCCCCGACTACTTGAAGCTGTCTTCCCCGAGGGCTTCAAGTGGGAGCGCGTGATGAACTTCGAGGACG  
GCGGCGTGGTGACCGTGACCCAGGACTCCTCCCTGCAGGACGGCGAGTTTCATCTACAAGGTGAAGCTGCGCGGCACCAACT  
TCCCCTCCGACGGCCCCGTAATGCAGAGAAGACCATGGGCTGGGAGGCCCTCCTCCGAGCGGATGTACCCCGAGGACGGCG  
CCCTGAAGGGCGAGATCAAGCAGAGGCTGAAGCTGAAGGACGGCGGCCACTACGACGCTGAGGTCAAGACCACCTACAAG  
GCCAAGAAGCCCGTGCAGCTGCCCGGCGCCTACAACGTCAACATCAAGTTGGACATCACCTCCCACAACGAGGACTACACC  
ATCGTGAACAGTACGAACGCGCCGAGGGCGCCACTCCACCGCGGCATGGACGAGCTGTACGCGTCTGGAGGCGCCAC  
CAATTTAGCCTGCTGAAACAGGCTGGGACGTGGAAGAGAACCCTGGACCTGGACAAAAGTCGGTGAGCAAGGGCGAGGA  
GCTGTTACCCGGGGTGGTGCCATCCTGGTCGAGCTGGACGGCGACGTAAACGGCCACAAGTTACGCGTGTCCGGCGAGGG  
CGAGGGCGATGCCACCTACGGCAAGCTGACCTGAAGTTTCATCTGCACCAACCGCAAGCTGCCCGTCCCTGGCCACCCT  
CGTGACCCTGACCTACGGCGTGCAGTCTCAGCCGTACCCGCTACCCACACATGAAGCAGCACGACTTCTTCAAGTCCGCC  
ATGCCGAAGGCTACGTCCAGGAGCGCACCATCTTCTTCAAGGACGACGGCAACTACAAGACCCGCGCCGAGGTGAAGTTC  
GAGGGCGACACCCTGGTGAACCGCATCGAGCTGAAGGGCATCGACTTCAAGGAGGACGGCAACATCCTGGGGCACAAGCTG  
GAGTACAACATAACAGCCACTAGTCTATATCATGGCCGACAAGCAGAAGAACGGCATCAAGGTGAACTTCAAGATCCGCC  
ACAACATCGAGGACGGCAGCGTGCAGCTCGCCGACCACACTACCAGCAAGAACACCCCATCGGCGACGGCCCCGTGCTGCTGC  
CCGACAACCACTACCTGAGCACCCAGTCCGCCGTGACCAAGACCCCAAGCAGAGAAGCGCGATCATGCTGCTGGAGT  
TCGTGACCCGCGCCGGGATCACTCTCGGCATGGACGAGCTGTACAAGTAA GAATTCCTCCTCAGGTGCAGGCTGCCTATCAG  
AAGGTGGTGGCTGGTGTGGCCAATGCCCTGGCTCACAAATACCACTGAGATCTTTTTCCCTCTGCCAAAAATTATGGGGACATCA  
TGAAGCCCCTTGAGCATCTGACTTCTGGCTAATAAAGGAAATTTATTTTCATTGCAATAGTGTGTTGGAATTTTTGTGTCTCTCAC  
TCGGAAGGACATATGGGAGGGGTGCACAATCAACCTCTGGATTACAAAATTTGTGAAAGATTGACTGGTATTCTTAACTATGTTG  
CTCCTTTTACGCTATGTGGATAACGCTGCTTTAATGCCTTTGTATCATGCGTTAACTAACTGTTTATTGACGCTTATAATGGTTAC  
AAATAAAGCAATAGCATCACAAATTTACAAATAAAGCAATTTTTCTACTGCACTTAGTTGTGGTTTGTCCAAACTCATCAATGTAT  
CTTATCATGTCTGGAATTGACTCAAATGATGTCAATTAGTCTATCAGAAGCTATCTGGTCTCCCTTCCGGGGGACAAGACATCCCT  
GTTTAAATTTAAACAGCAGTGTTCCAAACCTGGGTTCTTATATCCCTTGTCTGGTCAACCAGGTTGCAGGGTTTTCTGTCTCA  
CAGGAACGAAGTCCCTAAGAAACAGTGGCAGCCAGTTTTAGCCCCGGAATTGACTGGATTCTTTTTTAGGGCCATTGGTAT  
GGCTTTTTCCCGTATCCCCCAGGTGTCTGCAGGCTCAAAGAGCAGCGAGAAGCGTTAGAGGAAAGCGATCCCGTGCCACC  
TCCCCGTGCCGGGCTGTCCCGCACGCTGCCGGCTCGGGGATGCGGGGGAGCGCCGACCCGAGCGGAGCCCGGGC  
GGCTCGCTGCTGCCCCCTAGCGGGGGAGGGACGTAATTACATCCCTGGGGGCTTTGGGGGGGGGCTGTCCCTGATATCTATAA  
CAAGAAAATATATATAATAAGTTATCAGTAAGTAGAACATGAAATAACAATATAATTATCGTATGAGTTAAATCTTAAAAGTCAC  
GTAAGATAATCATGCGTCATTTTACTCACGCGGTGTTATAGTTCAAATCAGTGACACTTACCGCATTGACAAGCACGCTC  
ACGGGAGCTCCAAGCGGGGACTGAGATGTCTTAAATGCACAGCGACGGATTTCGCGCTATTTAGAAAGAGAGCAATATTTCAA  
GAATGCATGCGTCAATTTTACGCGACTATCTTTCTAGGGTTAATCTAGCTGCATCAGGATCATATCGTCGGGTCTTTTTCCGGC  
TCAGTCATCGCCCAAGCTGGCGTATCTGGGCATCGGGGAGGAAGAACCCCGTGCCTTTTTCCCGCAGGTTGAAGCAGCGATGG  
AAAGAGTTTGGCGAGGATGACTGCTGCTGCATTGACGTTGAGCGAAAACGCACGTTTACCATGATGATTCCGGAAAGGTGTGGCC  
ATGCACGCCTTAAACGGTGAAGTTCGTTTCAGGCCACCTGGGATACCAGTTCGTCGCGGCTTTCCGGACACAGTTCGGGATG  
GTCAGCCCCAAGCGCATCAGCAACCCGAACAATACCGGGCAGACCGGAACTGCCGTGCCGGTGTGCAGATTAATGACAGCGG  
TGCGGCGCTGGGATATTACGTCAGCGAGGACGGGTATCCTGGCTGGATGCCGCAGAAATGGACATGGATACCCCGTGAGTTAC  
CCGGCGGGCGCGCTTGGCGTAATCATGGTCATAGCTGTTTCTGTGTGAAATTGTTATCCGCTACAATTCACACAACATACGA  
GCCGGAAGCATAAAGTGTAAGCCTGGGGTGCCTAATGAGTGAGCTAACTCACATTAATTGCGTTGCGCTCACTGCCCGCTTTC  
CAGTCGGGAAACCTGTCTGTGCCAGCTGCATTAATGAATCGGCCAACGCGCGGGGAGAGGCGGTTTGGTATTGGGCGCTCTTC  
CGCTTCTCGCTCACTGACTCGCTGCGCTCGGTGTTCCGGCTGCGGGCAGCGGTATCAGCTCAAAAGGCGGTAATACGGT  
TATCCACAGAATCAGGGGATAACGCAGGAAAGAATGTGAGCAAAAGGCCAGCAAAAGGCCAGGAACCGTAAAAAGGCCGCG  
TTGCTGGCCTTTTTCCATAGGCTCCGCCCCCTGACGAGCATCACAAAAATCGACGCTCAAGTCAGAGGTGGCGAAACCCGACA  
GGACATAAAGATACCAGGCGTTTTCCCCCTGGAAGCTCCCTCGTGCCTCTCCTGTTCCGACCCTGCCGTTACCGGATACCTG  
TCCGCTTTCTCCCTTCGGGAAGCGTGGCGCTTTCTCATAGCTCACGCTGTAGGTATCTCAGTTCCGGTGTAGGTGCTTCCGCTC  
AAGCTGGGCTGTGTGCACGAACCCCGCTTACGCCGACCGCTGCGCCTTATCCGTAACATATCGTCTTGAGTCCAACCCGGTA  
AGACACGACTTATCGCCACTGGCAGCAGCCACTGGTAACAGGATTAGCAGAGCGAGGTATGTAGGCGGTGCTACAGAGTTCTTG  
AAGTGGTGGCCTAACTACGGCTACACTAGAAGGACAGTATTTGGTATCTGCGCTGCTGTAAGCCAGTTACCTTCGGAAAAAGA  
GTTGGTAGCTCTTGATCCGGCAAAACAAACCACCGCTGGTAGCGGTGTTTTTTTTTTGTTTGAAGCAGCAGATTACGCGCAGAAAAA  
AAGGATCTCAAGAAGATCCTTTGATCTTTTCTACGGGGTCTGACGCTCAGTGAACGAAAACCTCACGTTAAGGGATTTTGGTCA  
GAGATTATCAAAAAGGATCTTACCTAGATCCTTTTAAATTAATAAAGTATTAATCAATCTAAAGTATATATGAGTAAACTTGG  
TCTGACAGTTACCAATGCTTAATCAGTGAGGCACCTATCTCAGCGATCTGTCTATTTTCGTTTCATCCATAGTTGCCTGACTCCCCGT  
CGTGTAGATAACTACGATACGGGAGGGCTTACCATCTGGCCCCAGTGTGCAATGATACCGCGAGACCCACGCTCACCGGCTC  
CAGATTTATCAGCAATAAACACAGCCAGCCGGAAGGGCCGAGCGAGAAGTGGTCCCTGCAACTTTATCCGCTCCATCCAGTCTA  
TTAATTGTTGCCGGGAAGCTAGAGTAAGTAGTTCCGCCAGTTAATAGTTTGGCAACGTTGTTGCCATTGCTACAGGCATCGTGGT  
GTCACGCTCGTCTTTGGTATGGCTTCATCAGCTCCGGTCCCAACGATCAAGGCGAGTTACATGATCCCCATGTTGTGCAAA  
AAAGCGGTTAGCTCCTTCGGTCCCTCCGATCGTTGTGAGAAGTAAAGTTGGCCGAGTGTATCACTCATGTTATGGCAGCACTG  
CATAATTCTCTTACTGTCAATGCCATCCGTAAGATGCTTTTTCTGTGACTGGTGACTCAACCAAGTCAATCTGAGAATAGTGTAT  
GCGGCGACCGAGTTGCTCTTGGCCGCGTCAATACGGGATAAATACCGCGCACATAGCAGAACTTTAAAAGTGTCTCATCTTTGG  
AAAACGTTCTTCGGGGCGAAAACCTCAAGGATCTTACCCTGTTGAGATCCAGTTTCGATGTAACCCACTCGTGCACCCAACTGA  
TCTTCAGCATCTTTTACTTTACCAGCGTTTCTGGGTGAGCAAAAACAGGAAGGCAAAATGCCGCAAAAAAGGGAATAAGGGCGA  
CACGGAAATGTTGAATACTCAT
